# Supplementary material for: Studying the Bulk and Contour Ice Nucleation of Water Droplets via Quartz Crystal Microbalances
Source: Micromachines (Basel). 2021 Apr 20;12(4):463. doi: 10.3390/mi12040463 (PMC8074365; doi:10.3390/mi12040463)
Supplement: Supplementary file 1 [file micromachines-12-00463-s001.zip › Supporting information_freezing mode.xlsx]

## Sheet: Bulk mode_1
SRS QCM200 Data File							the droplet deposition event is marked as the beginning of frequency decrease
Data Taken on 1/27/2021 at 11:22:03 AM							the droplet's recalescent freezing is marked as the last value of f prior to getting out-of-resonance
Tag Definitions							the droplet's initial thawing is marked as the first frequency value after getting back to resonance
Zero Rel F = 1							the droplet's full thawing is marked as the last frequency value, where steady signal fluctuations occur
Zero Rel R = 2
Zero Rel F and R = 3							The above legend applies to all three bulk freezing assays
User Tag = 4
Begining of File = 5
The Sauerbrey model was used to calculate the relative mass change.
Notes:
Raw F (Hz)	Raw R (Ohms)	Delta F (Hz)	Delta R (Ohms)	Delta Mass (ug/cm2)	Time (s)	Tag
4.98427e+06	1297.6	0	0	0	0.048	5
4.98428e+06	1297.6	3.5	0	-0.0618368	59.044	0
4.98428e+06	1297.6	3.5	0	-0.0618368	59.228	0
4.98428e+06	1297.6	3.6	0	-0.0636036	60.313	0
4.98428e+06	1297.6	3.6	0	-0.0636036	61.292	0
4984276	1297.6	3.7	0	-0.0653703	62.263	0
4984276	1297.6	3.7	0	-0.0653703	63.233	0
4.98428e+06	1297.6	3.8	0	-0.0671371	64.316	0
4.98428e+06	1297.6	3.8	0	-0.0671371	65.287	0
4.98428e+06	1297.6	3.9	0	-0.0689039	66.264	0
4.98428e+06	1297.6	4	0	-0.0706706	67.236	0
4.98428e+06	1297.6	4	0	-0.0706706	68.321	0
4.98428e+06	1297.6	4.1	0	-0.0724374	69.292	0
4.98428e+06	1297.6	4.1	0	-0.0724374	70.264	0
4.98428e+06	1297.6	4.1	0	-0.0724374	71.241	0
4.98428e+06	1297.6	4.3	0	-0.0759709	72.324	0
4.98428e+06	1297.6	4.3	0	-0.0759709	73.294	0
4.98428e+06	1297.6	4.4	0	-0.0777377	74.264	0
4.98428e+06	1297.6	4.5	0	-0.0795045	75.236	0
4.98428e+06	1297.6	4.5	0	-0.0795045	76.325	0
4.98428e+06	1297.6	4.6	0	-0.0812712	77.294	0
4.98428e+06	1297.6	4.6	0	-0.0812712	78.264	0
4984277	1297.6	4.7	0	-0.083038	79.236	0
4984277	1297.6	4.7	0	-0.083038	80.321	0
4.98428e+06	1297.6	4.8	0	-0.0848048	81.294	0
4.98428e+06	1297.6	4.8	0	-0.0848048	82.265	0
4.98428e+06	1297.6	4.9	0	-0.0865715	83.237	0
4.98428e+06	1297.6	5	0	-0.0883383	84.322	0
4.98428e+06	1297.6	5	0	-0.0883383	85.293	0
4.98428e+06	1297.6	5.1	0	-0.0901051	86.272	0
4.98428e+06	1297.6	5.1	0	-0.0901051	87.242	0
4.98428e+06	1297.6	5.3	0	-0.0936386	88.325	0
4.98428e+06	1297.6	5.3	0	-0.0936386	89.294	0
4.98428e+06	1297.6	5.3	0	-0.0936386	90.264	0
4.98428e+06	1297.6	5.4	0	-0.0954054	91.24	0
4.98428e+06	1297.6	5.5	0	-0.0971721	92.323	0
4.98428e+06	1297.6	5.5	0	-0.0971721	93.292	0
4.98428e+06	1297.6	5.6	0	-0.0989389	94.264	0
4984278	1297.6	5.7	0	-0.100706	95.236	0
4984278	1297.6	5.7	0	-0.100706	96.325	0
4.98428e+06	1297.6	5.8	0	-0.102472	97.294	0
4.98428e+06	1297.6	5.8	0	-0.102472	98.265	0
4.98428e+06	1297.6	5.8	0	-0.102472	99.239	0
4.98428e+06	1297.6	6	0	-0.106006	100.324	0
4.98428e+06	1297.6	6	0	-0.106006	101.301	0
4.98428e+06	1297.6	6.1	0	-0.107773	102.273	0
4.98428e+06	1297.6	6.1	0	-0.107773	103.243	0
4.98428e+06	1297.6	6.3	0	-0.111306	104.324	0
4.98428e+06	1297.6	6.3	0	-0.111306	105.293	0
4.98428e+06	1297.6	6.3	0	-0.111306	106.263	0
4.98428e+06	1297.6	6.4	0	-0.113073	107.348	0
4.98428e+06	1297.6	6.5	0	-0.11484	108.32	0
4.98428e+06	1297.6	6.5	0	-0.11484	109.292	0
4.98428e+06	1297.6	6.6	0	-0.116607	110.263	0
4.98428e+06	1297.6	6.6	0	-0.116607	111.356	0
4984279	1297.6	6.7	0	-0.118373	112.324	0
4984279	1297.6	6.7	0	-0.118373	113.293	0
4.98428e+06	1297.6	6.8	0	-0.12014	114.263	0
4.98428e+06	1297.6	6.8	0	-0.12014	115.351	0
4.98428e+06	1297.6	6.9	0	-0.121907	116.323	0
4.98428e+06	1297.6	7	0	-0.123674	117.292	0
4.98428e+06	1297.6	7.1	0	-0.12544	118.264	0
4.98428e+06	1297.6	7.1	0	-0.12544	119.351	0
4.98428e+06	1297.6	7.1	0	-0.12544	120.323	0
4.98428e+06	1297.6	7.3	0	-0.128974	121.298	0
4.98428e+06	1297.6	7.3	0	-0.128974	122.27	0
4.98428e+06	1297.6	7.3	0	-0.128974	123.355	0
4.98428e+06	1297.6	7.5	0	-0.132508	124.325	0
4.98428e+06	1297.6	7.5	0	-0.132508	125.294	0
4.98428e+06	1297.6	7.6	0	-0.134274	126.268	0
4.98428e+06	1297.6	7.6	0	-0.134274	127.355	0
4984280	1297.6	7.7	0	-0.136041	128.325	0
4.98428e+06	1297.6	7.8	0	-0.137808	129.294	0
4.98428e+06	1297.6	7.8	0	-0.137808	130.265	0
4.98428e+06	1297.6	7.8	0	-0.137808	131.356	0
4.98428e+06	1297.6	7.9	0	-0.139574	132.324	0
4.98428e+06	1297.6	8	0	-0.141341	133.293	0
4.98428e+06	1297.6	8	0	-0.141341	134.376	0
4.98428e+06	1297.6	8	0	-0.141341	135.346	0
4.98428e+06	1297.6	8.1	0	-0.143108	136.316	0
4.98428e+06	1297.6	8.2	0	-0.144875	137.284	0
4.98428e+06	1297.6	8.3	0	-0.146642	138.367	0
4.98428e+06	1297.6	8.3	0	-0.146642	139.336	0
4.98428e+06	1297.6	8.4	0	-0.148408	140.306	0
4.98428e+06	1297.6	8.5	0	-0.150175	141.282	0
4.98428e+06	1297.6	8.5	0	-0.150175	142.365	0
4.98428e+06	1297.6	8.6	0	-0.151942	143.334	0
4.98428e+06	1297.6	8.6	0	-0.151942	144.304	0
4984281	1297.6	8.7	0	-0.153709	145.389	0
4984281	1297.6	8.7	0	-0.153709	146.361	0
4.98428e+06	1297.6	8.8	0	-0.155475	147.333	0
4.98428e+06	1297.6	8.9	0	-0.157242	148.305	0
4.98428e+06	1297.6	8.9	0	-0.157242	149.39	0
4.98428e+06	1297.6	9	0	-0.159009	150.362	0
4.98428e+06	1297.6	9	0	-0.159009	151.335	0
4.98428e+06	1297.6	9.1	0	-0.160776	152.305	0
4.98428e+06	1297.6	9.1	0	-0.160776	153.39	0
4.98428e+06	1297.6	9.2	0	-0.162543	154.362	0
4.98428e+06	1297.6	9.3	0	-0.164309	155.333	0
4.98428e+06	1297.6	9.3	0	-0.164309	156.305	0
4.98428e+06	1297.6	9.5	0	-0.167843	157.39	0
4.98428e+06	1297.6	9.5	0	-0.167843	158.362	0
4.98428e+06	1297.6	9.6	0	-0.169609	159.333	0
4.98428e+06	1297.6	9.6	0	-0.169609	160.305	0
4.98428e+06	1297.6	9.6	0	-0.169609	161.397	0
4984282	1297.6	9.7	0	-0.171376	162.367	0
4.98428e+06	1297.6	9.8	0	-0.173143	163.336	0
4.98428e+06	1297.6	9.8	0	-0.173143	164.307	0
4.98428e+06	1297.6	9.9	0	-0.17491	165.394	0
4.98428e+06	1297.6	9.9	0	-0.17491	166.366	0
4.98428e+06	1297.6	10	0	-0.176677	167.335	0
4.98428e+06	1297.6	10.1	0	-0.178443	168.305	0
4.98428e+06	1297.6	10.1	0	-0.178443	169.39	0
4.98428e+06	1297.6	10.3	0	-0.181977	170.362	0
4.98428e+06	1297.6	10.2	0	-0.18021	171.335	0
4.98428e+06	1297.6	10.4	0	-0.183744	172.307	0
4.98428e+06	1297.6	10.4	0	-0.183744	173.394	0
4.98428e+06	1297.6	10.5	0	-0.18551	174.366	0
4.98428e+06	1297.6	10.6	0	-0.187277	175.335	0
4.98428e+06	1297.6	10.5	0	-0.18551	176.305	0
4984283	1297.6	10.7	0	-0.189044	177.39	0
4984283	1297.5	10.7	-0.1	-0.189044	178.362	0
4984283	1297.5	10.7	-0.1	-0.189044	179.334	0
4.98428e+06	1297.5	10.8	-0.1	-0.190811	180.417	0
4.98428e+06	1297.6	11	0	-0.194344	181.396	0
4.98428e+06	1297.5	11	-0.1	-0.194344	182.366	0
4.98428e+06	1297.5	11	-0.1	-0.194344	183.335	0
4.98428e+06	1297.5	11.1	-0.1	-0.196111	184.418	0
4.98428e+06	1297.5	11.1	-0.1	-0.196111	185.388	0
4.98428e+06	1297.6	11.1	0	-0.196111	186.358	0
4.98428e+06	1297.5	11.3	-0.1	-0.199645	187.328	0
4.98428e+06	1297.6	11.4	0	-0.201411	188.409	0
4.98428e+06	1297.6	11.4	0	-0.201411	189.378	0
4.98428e+06	1297.6	11.5	0	-0.203178	190.348	0
4.98428e+06	1297.6	11.5	0	-0.203178	191.324	0
4.98428e+06	1297.6	11.6	0	-0.204945	192.407	0
4.98428e+06	1297.6	11.6	0	-0.204945	193.376	0
4984284	1297.6	11.7	0	-0.206712	194.346	0
4984284	1297.6	11.7	0	-0.206712	195.431	0
4.98428e+06	1297.6	11.8	0	-0.208478	196.403	0
4.98428e+06	1297.6	11.8	0	-0.208478	197.375	0
4.98428e+06	1297.6	12	0	-0.212012	198.347	0
4.98428e+06	1297.6	12	0	-0.212012	199.432	0
4.98428e+06	1297.6	12	0	-0.212012	200.404	0
4.98428e+06	1297.6	12.1	0	-0.213779	201.377	0
4.98428e+06	1297.6	12.1	0	-0.213779	202.347	0
4.98428e+06	1297.6	12.2	0	-0.215546	203.432	0
4.98428e+06	1297.6	12.4	0	-0.219079	204.404	0
4.98428e+06	1297.6	12.4	0	-0.219079	205.375	0
4.98428e+06	1297.6	12.5	0	-0.220846	206.347	0
4.98428e+06	1297.6	12.6	0	-0.222612	207.432	0
4.98428e+06	1297.6	12.6	0	-0.222612	208.404	0
4984285	1297.6	12.7	0	-0.224379	209.375	0
4984285	1297.6	12.7	0	-0.224379	210.347	0
4.98429e+06	1297.6	12.8	0	-0.226146	211.432	0
4.98429e+06	1297.6	12.9	0	-0.227913	212.404	0
4.98429e+06	1297.6	12.9	0	-0.227913	213.375	0
4.98429e+06	1297.6	13	0	-0.22968	214.347	0
4.98429e+06	1297.6	13.1	0	-0.231446	215.432	0
4.98429e+06	1297.6	13.1	0	-0.231446	216.404	0
4.98429e+06	1297.6	13.1	0	-0.231446	217.375	0
4.98429e+06	1297.6	13.2	0	-0.233213	218.347	0
4.98429e+06	1297.6	13.3	0	-0.23498	219.432	0
4.98429e+06	1297.6	13.3	0	-0.23498	220.404	0
4.98429e+06	1297.6	13.5	0	-0.238513	221.377	0
4.98429e+06	1297.6	13.5	0	-0.238513	222.351	0
4.98429e+06	1297.6	13.6	0	-0.24028	223.438	0
4.98429e+06	1297.6	13.6	0	-0.24028	224.408	0
4984286	1297.5	13.7	-0.1	-0.242047	225.377	0
4984286	1297.5	13.7	-0.1	-0.242047	226.349	0
4.98429e+06	1297.5	13.8	-0.1	-0.243814	227.436	0
4.98429e+06	1297.6	13.8	0	-0.243814	228.407	0
4.98429e+06	1297.5	13.9	-0.1	-0.245581	229.376	0
4.98429e+06	1297.6	14	0	-0.247347	230.459	0
4.98429e+06	1297.6	14.1	0	-0.249114	231.429	0
4.98429e+06	1297.6	14.2	0	-0.250881	232.399	0
4.98429e+06	1297.6	14.3	0	-0.252648	233.367	0
4.98429e+06	1297.6	14.3	0	-0.252648	234.45	0
4.98429e+06	1297.6	14.5	0	-0.256181	235.419	0
4.98429e+06	1297.6	14.6	0	-0.257948	236.389	0
4.98429e+06	1297.6	14.6	0	-0.257948	237.363	0
4984287	1297.6	14.7	0	-0.259715	238.448	0
4.98429e+06	1297.6	14.8	0	-0.261481	239.417	0
4.98429e+06	1297.6	15	0	-0.265015	240.389	0
4984294	1297.6	21.7	0	-0.383388	241.368	0
4.98429e+06	1297.5	21.4	-0.1	-0.378088	242.45	0
4.98429e+06	1297.6	21	0	-0.371021	243.419	0
4984293	1297.7	20.7	0.1	-0.365721	244.389	0
4.98429e+06	1297.6	20.5	0	-0.362187	245.477	0
4.98429e+06	1297.6	20.4	0	-0.36042	246.449	0
4.98429e+06	1297.6	20.3	0	-0.358654	247.418	0
4.98429e+06	1297.6	20.6	0	-0.363954	248.388	0
4.98429e+06	1297.6	21	0	-0.371021	249.473	0
4.98429e+06	1297.6	21.5	0	-0.379855	250.445	0
4.98429e+06	1297.6	22.3	0	-0.393989	251.417	0
4.9843e+06	1297.6	23.1	0	-0.408123	252.388	0
4.9843e+06	1297.6	24.1	0	-0.425791	253.476	0
4.9843e+06	1297.6	25.3	0	-0.446992	254.448	0
4984299	1297.6	26.7	0	-0.471726	255.42	0
4.9843e+06	1297.6	28	0	-0.494694	256.39	0
4.9843e+06	1297.6	29.5	0	-0.521196	257.478	0
4.9843e+06	1297.5	31.1	-0.1	-0.549464	258.448	0
4.98431e+06	1297.5	32.8	-0.1	-0.579499	259.417	0
4.98431e+06	1297.6	34.6	0	-0.611301	260.388	0
4.98431e+06	1297.6	36.6	0	-0.646636	261.481	0
4984311	1297.6	38.7	0	-0.683739	262.449	0
4.98431e+06	1297.6	41	0	-0.724374	263.419	0
4.98432e+06	1297.6	43.3	0	-0.76501	264.389	0
4984318	1297.6	45.7	0	-0.807412	265.477	0
4.98432e+06	1297.6	48.3	0	-0.853348	266.449	0
4.98432e+06	1297.6	51	0	-0.901051	267.419	0
4984326	1297.6	53.7	0	-0.948753	268.391	0
4984329	1297.6	56.7	0	-1.00176	269.478	0
4984332	1297.6	59.7	0	-1.05476	270.448	0
4.98434e+06	1297.6	62.8	0	-1.10953	271.418	0
4.98434e+06	1297.7	66.1	0.1	-1.16783	272.39	0
4.98434e+06	1297.7	69.5	0.1	-1.2279	273.477	0
4.98435e+06	1297.7	72.9	0.1	-1.28797	274.448	0
4.98435e+06	1297.7	76.5	0.1	-1.35158	275.417	0
4.98435e+06	1297.7	80.2	0.1	-1.41695	276.502	0
4.98436e+06	1297.8	84	0.2	-1.48408	277.473	0
4.98436e+06	1297.8	87.8	0.2	-1.55122	278.446	0
4984364	1297.8	91.7	0.2	-1.62013	279.418	0
4.98437e+06	1297.9	95.8	0.3	-1.69256	280.501	0
4.98437e+06	1297.9	99.9	0.3	-1.765	281.479	0
4.98438e+06	1297.9	104.1	0.3	-1.8392	282.45	0
4.98438e+06	1298	108.5	0.4	-1.91694	283.419	0
4.98439e+06	1298	112.8	0.4	-1.99291	284.511	0
4.98439e+06	1298	117.3	0.4	-2.07242	285.481	0
4.98439e+06	1298	122	0.4	-2.15545	286.449	0
4.9844e+06	1298.1	126.6	0.5	-2.23673	287.418	0
4.9844e+06	1298.1	131.3	0.5	-2.31976	288.502	0
4.98441e+06	1298.1	136.1	0.5	-2.40457	289.473	0
4.98441e+06	1298.1	141	0.5	-2.49114	290.445	0
4.98442e+06	1298.2	145.9	0.6	-2.57771	291.417	0
4.98442e+06	1298.2	151	0.6	-2.66782	292.502	0
4.98443e+06	1298.3	156	0.7	-2.75616	293.473	0
4.98443e+06	1298.3	161.1	0.7	-2.84626	294.446	0
4.98444e+06	1298.3	166.3	0.7	-2.93813	295.417	0
4.98444e+06	1298.4	171.6	0.8	-3.03177	296.502	0
4.98445e+06	1298.4	176.9	0.8	-3.12541	297.479	0
4.98445e+06	1298.4	182.3	0.8	-3.22081	298.449	0
4984460	1298.4	187.7	0.8	-3.31622	299.418	0
4.98447e+06	1298.4	193.3	0.8	-3.41516	300.501	0
4.98447e+06	1298.5	198.8	0.9	-3.51233	301.482	0
4.98448e+06	1298.5	204.4	0.9	-3.61127	302.453	0
4.98448e+06	1298.5	210.1	0.9	-3.71198	303.423	0
4.98449e+06	1298.6	215.8	1	-3.81268	304.51	0
4.98449e+06	1298.6	221.6	1	-3.91515	305.482	0
4.9845e+06	1298.6	227.5	1	-4.01939	306.45	0
4.98451e+06	1298.7	233.3	1.1	-4.12186	307.419	0
4.98451e+06	1298.7	239.1	1.1	-4.22434	308.511	0
4.98452e+06	1298.8	245	1.2	-4.32858	309.481	0
4.98452e+06	1298.8	251	1.2	-4.43458	310.449	0
4.98453e+06	1298.9	257	1.3	-4.54059	311.532	0
4.98454e+06	1298.9	263.1	1.3	-4.64836	312.506	0
4.98454e+06	1298.9	269.3	1.3	-4.7579	313.478	0
4.98455e+06	1298.9	275.5	1.3	-4.86744	314.448	0
4984554	1299	281.7	1.4	-4.97698	315.531	0
4.98456e+06	1299	287.8	1.4	-5.08475	316.501	0
4.98457e+06	1299	294.1	1.4	-5.19606	317.471	0
4.98457e+06	1299	300.4	1.4	-5.30736	318.441	0
4984579	1299.1	306.7	1.5	-5.41867	319.524	0
4.98459e+06	1299.1	313.1	1.5	-5.53174	320.495	0
4.98459e+06	1299.1	319.6	1.5	-5.64658	321.471	0
4.9846e+06	1299.1	326	1.5	-5.75966	322.441	0
4.9846e+06	1299.1	332.4	1.5	-5.87273	323.524	0
4.98461e+06	1299.1	338.9	1.5	-5.98757	324.495	0
4.98462e+06	1299.2	345.5	1.6	-6.10418	325.464	0
4.98462e+06	1299.2	351.9	1.6	-6.21725	326.436	0
4.98463e+06	1299.2	358.5	1.6	-6.33386	327.521	0
4.98464e+06	1299.3	365	1.7	-6.4487	328.491	0
4984644	1299.3	371.7	1.7	-6.56707	329.461	0
4.98465e+06	1299.3	378.3	1.7	-6.68368	330.544	0
4.98466e+06	1299.3	384.8	1.7	-6.79852	331.515	0
4.98466e+06	1299.4	391.6	1.8	-6.91866	332.487	0
4.98467e+06	1299.4	398.3	1.8	-7.03703	333.458	0
4.98468e+06	1299.4	404.9	1.8	-7.15364	334.543	0
4.98468e+06	1299.5	411.6	1.9	-7.27201	335.513	0
4.98469e+06	1299.5	418.4	1.9	-7.39215	336.486	0
4.9847e+06	1299.6	425.1	2	-7.51052	337.458	0
4.9847e+06	1299.6	431.8	2	-7.6289	338.543	0
4.98471e+06	1299.6	438.6	2	-7.74904	339.514	0
4.98472e+06	1299.7	445.5	2.1	-7.87094	340.486	0
4.98472e+06	1299.7	452.3	2.1	-7.99108	341.461	0
4.98473e+06	1299.8	459.1	2.2	-8.11122	342.544	0
4.98474e+06	1299.8	465.8	2.2	-8.2296	343.515	0
4.98475e+06	1299.8	472.8	2.2	-8.35327	344.487	0
4.98475e+06	1299.9	479.6	2.3	-8.47341	345.458	0
4.98476e+06	1299.9	486.5	2.3	-8.59532	346.542	0
4.98477e+06	1300	493.4	2.4	-8.71722	347.514	0
4.98477e+06	1300	500.1	2.4	-8.8356	348.486	0
4.98478e+06	1300.1	507.1	2.5	-8.95927	349.458	0
4.98479e+06	1300.1	514	2.5	-9.08118	350.543	0
4.98479e+06	1300.2	520.8	2.6	-9.20132	351.521	0
4.9848e+06	1300.2	527.8	2.6	-9.32499	352.492	0
4984807	1300.3	534.7	2.7	-9.4469	353.46	0
4984814	1300.3	541.7	2.7	-9.57057	354.543	0
4.98482e+06	1300.4	548.6	2.8	-9.69248	355.513	0
4.98483e+06	1300.4	555.5	2.8	-9.81439	356.482	0
4.98483e+06	1300.4	562.5	2.8	-9.93806	357.565	0
4.98484e+06	1300.5	569.5	2.9	-10.0617	358.533	0
4.98485e+06	1300.5	576.3	2.9	-10.1819	359.502	0
4.98486e+06	1300.5	583.3	2.9	-10.3056	360.472	0
4.98486e+06	1300.6	590.2	3	-10.4275	361.557	0
4.98487e+06	1300.6	597.2	3	-10.5511	362.53	0
4.98488e+06	1300.7	604.2	3.1	-10.6748	363.5	0
4.98488e+06	1300.7	611.1	3.1	-10.7967	364.474	0
4.98489e+06	1300.8	618.1	3.2	-10.9204	365.561	0
4.9849e+06	1300.8	625.1	3.2	-11.0441	366.531	0
4.9849e+06	1300.8	632	3.2	-11.166	367.502	0
4.98491e+06	1300.9	639.1	3.3	-11.2914	368.473	0
4.98492e+06	1300.9	646	3.3	-11.4133	369.56	0
4.98493e+06	1301	652.9	3.4	-11.5352	370.532	0
4.98493e+06	1301	660	3.4	-11.6607	371.501	0
4.98494e+06	1301.1	666.9	3.5	-11.7826	372.584	0
4.98495e+06	1301.2	673.8	3.6	-11.9045	373.556	0
4.98495e+06	1301.2	680.8	3.6	-12.0281	374.528	0
4984960	1301.2	687.7	3.6	-12.1501	375.5	0
4984967	1301.3	694.7	3.7	-12.2737	376.593	0
4984974	1301.3	701.7	3.7	-12.3974	377.565	0
4.98498e+06	1301.4	708.6	3.8	-12.5193	378.534	0
4.98499e+06	1301.5	715.6	3.9	-12.643	379.503	0
4.98499e+06	1301.5	722.5	3.9	-12.7649	380.586	0
4.985e+06	1301.6	729.4	4	-12.8868	381.556	0
4.98501e+06	1301.7	736.3	4.1	-13.0087	382.531	0
4.98502e+06	1301.7	743.3	4.1	-13.1324	383.501	0
4.98502e+06	1301.8	750.1	4.2	-13.2525	384.584	0
4.98503e+06	1301.9	757	4.3	-13.3744	385.554	0
4.98504e+06	1301.9	763.8	4.3	-13.4946	386.524	0
4985043	1301.9	770.7	4.3	-13.6165	387.497	0
4.98505e+06	1302	777.6	4.4	-13.7384	388.583	0
4.98506e+06	1302.1	784.5	4.5	-13.8603	389.554	0
4.98506e+06	1302.1	791.3	4.5	-13.9804	390.528	0
4.98507e+06	1302.2	798.1	4.6	-14.1006	391.5	0
4.98508e+06	1302.3	804.9	4.7	-14.2207	392.585	0
4.98508e+06	1302.3	811.8	4.7	-14.3426	393.556	0
4.98509e+06	1302.4	818.6	4.8	-14.4627	394.528	0
4.9851e+06	1302.4	825.5	4.8	-14.5846	395.504	0
4.9851e+06	1302.5	832.3	4.9	-14.7048	396.589	0
4.98511e+06	1302.6	839.1	5	-14.8249	397.561	0
4.98512e+06	1302.6	845.8	5	-14.9433	398.532	0
4.98512e+06	1302.7	852.5	5.1	-15.0617	399.502	0
4.98513e+06	1302.8	859.3	5.2	-15.1818	400.585	0
4.98514e+06	1302.8	866.1	5.2	-15.302	401.564	0
4.98515e+06	1302.8	872.8	5.2	-15.4203	402.533	0
4.98515e+06	1302.9	879.6	5.3	-15.5405	403.617	0
4.98516e+06	1302.9	886.3	5.3	-15.6588	404.586	0
4.98517e+06	1303	893.1	5.4	-15.779	405.557	0
4985172	1303.1	899.7	5.5	-15.8956	406.53	0
4.98518e+06	1303.1	906.5	5.5	-16.0157	407.615	0
4.98519e+06	1303.2	913.2	5.6	-16.1341	408.584	0
4.98519e+06	1303.2	919.8	5.6	-16.2507	409.554	0
4.9852e+06	1303.3	926.5	5.7	-16.3691	410.525	0
4.98521e+06	1303.3	933.2	5.7	-16.4875	411.611	0
4.98521e+06	1303.4	939.8	5.8	-16.6041	412.584	0
4.98522e+06	1303.5	946.5	5.9	-16.7224	413.554	0
4.98523e+06	1303.5	953.1	5.9	-16.8391	414.525	0
4985232	1303.6	959.7	6	-16.9556	415.611	0
4.98524e+06	1303.7	966.2	6.1	-17.0705	416.582	0
4.98525e+06	1303.7	972.8	6.1	-17.1871	417.553	0
4.98525e+06	1303.7	979.5	6.1	-17.3055	418.526	0
4.98526e+06	1303.8	986	6.2	-17.4203	419.612	0
4.98526e+06	1303.8	992.6	6.2	-17.5369	420.583	0
4.98527e+06	1303.9	999.1	6.3	-17.6518	421.554	0
4.98528e+06	1303.9	1005.6	6.3	-17.7666	422.525	0
4.98528e+06	1304	1012.1	6.4	-17.8814	423.611	0
4985291	1304	1018.7	6.4	-17.998	424.583	0
4.9853e+06	1304.1	1025.1	6.5	-18.1111	425.554	0
4.9853e+06	1304.1	1031.6	6.5	-18.226	426.533	0
4.98531e+06	1304.2	1038.1	6.6	-18.3408	427.617	0
4.98532e+06	1304.2	1044.6	6.6	-18.4556	428.586	0
4.98532e+06	1304.3	1051	6.7	-18.5687	429.557	0
4.98533e+06	1304.3	1057.5	6.7	-18.6836	430.532	0
4.98534e+06	1304.4	1063.8	6.8	-18.7949	431.616	0
4.98534e+06	1304.4	1070.2	6.8	-18.9079	432.585	0
4985349	1304.4	1076.7	6.8	-19.0228	433.554	0
4.98536e+06	1304.5	1083	6.9	-19.1341	434.639	0
4.98536e+06	1304.5	1089.5	6.9	-19.2489	435.609	0
4985368	1304.6	1095.7	7	-19.3585	436.582	0
4.98537e+06	1304.6	1102.1	7	-19.4715	437.552	0
4.98538e+06	1304.7	1108.5	7.1	-19.5846	438.638	0
4985387	1304.7	1114.7	7.1	-19.6941	439.608	0
4.98539e+06	1304.8	1121	7.2	-19.8055	440.578	0
4.9854e+06	1304.9	1127.3	7.3	-19.9168	441.545	0
4.98541e+06	1304.9	1133.6	7.3	-20.0281	442.631	0
4.98541e+06	1305	1139.8	7.4	-20.1376	443.604	0
4.98542e+06	1305	1146.1	7.4	-20.2489	444.574	0
4.98542e+06	1305.1	1152.3	7.5	-20.3585	445.544	0
4.98543e+06	1305.1	1158.6	7.5	-20.4698	446.628	0
4.98544e+06	1305.1	1164.8	7.5	-20.5793	447.598	0
4.98544e+06	1305.1	1171	7.5	-20.6888	448.571	0
4.98545e+06	1305.2	1177.2	7.6	-20.7984	449.656	0
4.98546e+06	1305.2	1183.3	7.6	-20.9061	450.627	0
4.98546e+06	1305.3	1189.5	7.7	-21.0157	451.605	0
4.98547e+06	1305.3	1195.6	7.7	-21.1235	452.575	0
4.98547e+06	1305.4	1201.8	7.8	-21.233	453.659	0
4.98548e+06	1305.4	1207.9	7.8	-21.3408	454.628	0
4.98549e+06	1305.5	1214	7.9	-21.4485	455.597	0
4.98549e+06	1305.5	1220	7.9	-21.5545	456.566	0
4.9855e+06	1305.6	1226.1	8	-21.6623	457.649	0
4.9855e+06	1305.6	1232.2	8	-21.7701	458.62	0
4.98551e+06	1305.7	1238.3	8.1	-21.8779	459.589	0
4.98552e+06	1305.7	1244.3	8.1	-21.9839	460.562	0
4.98552e+06	1305.8	1250.3	8.2	-22.0899	461.647	0
4.98553e+06	1305.8	1256.3	8.2	-22.1959	462.616	0
4.98553e+06	1305.9	1262.2	8.3	-22.3001	463.585	0
4.98554e+06	1305.9	1268.1	8.3	-22.4044	464.668	0
4.98555e+06	1306	1274.1	8.4	-22.5104	465.639	0
4.98555e+06	1306	1280.1	8.4	-22.6164	466.612	0
4.98556e+06	1306.1	1286	8.5	-22.7206	467.584	0
4.98556e+06	1306.2	1291.9	8.6	-22.8249	468.668	0
4985570	1306.2	1297.7	8.6	-22.9273	469.639	0
4.98558e+06	1306.3	1303.6	8.7	-23.0316	470.608	0
4.98558e+06	1306.3	1309.5	8.7	-23.1358	471.575	0
4.98559e+06	1306.4	1315.3	8.8	-23.2383	472.659	0
4.98559e+06	1306.4	1321.1	8.8	-23.3407	473.628	0
4.9856e+06	1306.5	1326.8	8.9	-23.4414	474.601	0
4985605	1306.5	1332.7	8.9	-23.5457	475.576	0
4.98561e+06	1306.6	1338.5	9	-23.6482	476.658	0
4.98562e+06	1306.6	1344.1	9	-23.7471	477.628	0
4.98562e+06	1306.7	1349.8	9.1	-23.8478	478.601	0
4.98563e+06	1306.8	1355.6	9.2	-23.9503	479.574	0
4.98563e+06	1306.8	1361.2	9.2	-24.0492	480.658	0
4.98564e+06	1306.9	1366.9	9.3	-24.1499	481.628	0
4985645	1306.9	1372.7	9.3	-24.2524	482.601	0
4.98565e+06	1307	1378.3	9.4	-24.3513	483.689	0
4.98566e+06	1307	1383.9	9.4	-24.4503	484.658	0
4.98566e+06	1307.1	1389.6	9.5	-24.551	485.628	0
4.98567e+06	1307.1	1395.1	9.5	-24.6482	486.601	0
4985673	1307.2	1400.7	9.6	-24.7471	487.689	0
4.98568e+06	1307.2	1406.4	9.6	-24.8478	488.658	0
4.98568e+06	1307.3	1411.8	9.7	-24.9432	489.628	0
4.98569e+06	1307.3	1417.5	9.7	-25.0439	490.601	0
4.9857e+06	1307.4	1422.9	9.8	-25.1393	491.689	0
4.9857e+06	1307.4	1428.5	9.8	-25.2383	492.658	0
4.98571e+06	1307.5	1434	9.9	-25.3354	493.628	0
4.98571e+06	1307.5	1439.5	9.9	-25.4326	494.601	0
4.98572e+06	1307.6	1445	10	-25.5298	495.689	0
4.98572e+06	1307.6	1450.4	10	-25.6252	496.658	0
4.98573e+06	1307.7	1455.8	10.1	-25.7206	497.628	0
4.98573e+06	1307.7	1461.3	10.1	-25.8178	498.601	0
4985739	1307.8	1466.7	10.2	-25.9132	499.689	0
4.98574e+06	1307.8	1472.1	10.2	-26.0086	500.658	0
4.98575e+06	1307.8	1477.5	10.2	-26.104	501.637	0
4.98576e+06	1307.9	1482.8	10.3	-26.1976	502.608	0
4.98576e+06	1308	1488.1	10.4	-26.2913	503.692	0
4.98577e+06	1308	1493.5	10.4	-26.3866	504.665	0
4.98577e+06	1308.1	1498.8	10.5	-26.4803	505.795	0
4.98578e+06	1308.1	1504.2	10.5	-26.5757	506.649	0
4.98578e+06	1308.1	1509.5	10.5	-26.6693	507.616	0
4985787	1308.2	1514.7	10.6	-26.7612	508.699	0
4.98579e+06	1308.2	1519.9	10.6	-26.8531	509.667	0
4.9858e+06	1308.3	1525.3	10.7	-26.9485	510.638	0
4.9858e+06	1308.4	1530.5	10.8	-27.0404	511.607	0
4.98581e+06	1308.4	1535.6	10.8	-27.1305	512.689	0
4.98581e+06	1308.5	1540.8	10.9	-27.2223	513.658	0
4.98582e+06	1308.5	1546	10.9	-27.3142	514.626	0
4.98582e+06	1308.6	1551.1	11	-27.4043	515.71	0
4.98583e+06	1308.7	1556.3	11.1	-27.4962	516.679	0
4.98583e+06	1308.7	1561.5	11.1	-27.588	517.648	0
4.98584e+06	1308.8	1566.6	11.2	-27.6782	518.617	0
4.98584e+06	1308.8	1571.6	11.2	-27.7665	519.699	0
4985849	1308.8	1576.7	11.2	-27.8566	520.667	0
4985854	1308.9	1581.7	11.3	-27.9449	521.638	0
4985859	1308.9	1586.7	11.3	-28.0333	522.722	0
4.98586e+06	1309	1591.8	11.4	-28.1234	523.691	0
4.98587e+06	1309	1596.8	11.4	-28.2117	524.658	0
4.98587e+06	1309.1	1601.8	11.5	-28.3001	525.626	0
4.98588e+06	1309.1	1606.8	11.5	-28.3884	526.71	0
4.98588e+06	1309.2	1611.8	11.6	-28.4767	527.679	0
4985889	1309.2	1616.7	11.6	-28.5633	528.648	0
4985894	1309.2	1621.7	11.6	-28.6517	529.619	0
4.9859e+06	1309.3	1626.6	11.7	-28.7382	530.699	0
4.9859e+06	1309.3	1631.5	11.7	-28.8248	531.667	0
4.98591e+06	1309.4	1636.4	11.8	-28.9114	532.638	0
4.98591e+06	1309.4	1641.2	11.8	-28.9962	533.722	0
4.98592e+06	1309.5	1646.1	11.9	-29.0827	534.691	0
4.98592e+06	1309.5	1650.9	11.9	-29.1675	535.715	0
4.98593e+06	1309.5	1655.8	11.9	-29.2541	536.688	0
4.98593e+06	1309.6	1660.6	12	-29.3389	537.659	0
4.98594e+06	1309.6	1665.5	12	-29.4255	538.631	0
4.98594e+06	1309.7	1670.1	12.1	-29.5068	539.719	0
4.98595e+06	1309.7	1675	12.1	-29.5933	540.737	0
4985952	1309.8	1679.7	12.2	-29.6764	541.708	0
4.98596e+06	1309.9	1684.5	12.3	-29.7612	542.678	0
4.98596e+06	1309.9	1689.2	12.3	-29.8442	543.649	0
4.98597e+06	1309.9	1693.8	12.3	-29.9255	544.731	0
4.98597e+06	1310	1698.6	12.4	-30.0103	545.684	0
4.98598e+06	1310.1	1703.3	12.5	-30.0933	546.657	0
4.98598e+06	1310.1	1707.9	12.5	-30.1746	547.742	0
4.98598e+06	1310.1	1712.5	12.5	-30.2559	548.71	0
4.98599e+06	1310.1	1717.3	12.5	-30.3407	549.679	0
4.98599e+06	1310.2	1721.8	12.6	-30.4202	550.648	0
4.986e+06	1310.2	1726.5	12.6	-30.5032	551.731	0
4.986e+06	1310.3	1731	12.7	-30.5827	552.7	0
4.98601e+06	1310.3	1735.6	12.7	-30.664	553.669	0
4.98601e+06	1310.4	1740.1	12.8	-30.7435	554.751	0
4986017	1310.4	1744.7	12.8	-30.8248	555.722	0
4.98602e+06	1310.5	1749.2	12.9	-30.9043	556.691	0
4986026	1310.5	1753.7	12.9	-30.9838	557.658	0
4.98603e+06	1310.6	1758.3	13	-31.065	558.74	0
4986035	1310.6	1762.7	13	-31.1428	559.71	0
4.98604e+06	1310.7	1767.3	13.1	-31.2241	560.679	0
4986044	1310.7	1771.7	13.1	-31.3018	561.648	0
4.98605e+06	1310.7	1776.1	13.1	-31.3795	562.732	0
4.98605e+06	1310.8	1780.6	13.2	-31.459	563.699	0
4.98606e+06	1310.8	1784.9	13.2	-31.535	564.667	0
4.98606e+06	1310.8	1789.3	13.2	-31.6127	565.751	0
4986066	1310.9	1793.7	13.3	-31.6905	566.722	0
4.98607e+06	1310.9	1798	13.3	-31.7664	567.691	0
4.98607e+06	1311	1802.4	13.4	-31.8442	568.66	0
4.98608e+06	1311	1806.8	13.4	-31.9219	569.742	0
4.98608e+06	1311	1811.1	13.4	-31.9979	570.71	0
4.98609e+06	1311.1	1815.5	13.5	-32.0756	571.679	0
4986092	1311.1	1819.7	13.5	-32.1498	572.763	0
4.9861e+06	1311.2	1823.9	13.6	-32.224	573.732	0
4.9861e+06	1311.2	1828.1	13.6	-32.2983	574.699	0
4.9861e+06	1311.3	1832.5	13.7	-32.376	575.667	0
4986109	1311.3	1836.7	13.7	-32.4502	576.751	0
4.98611e+06	1311.4	1841	13.8	-32.5262	577.722	0
4.98612e+06	1311.4	1845.1	13.8	-32.5986	578.691	0
4.98612e+06	1311.4	1849.3	13.8	-32.6728	579.773	0
4.98613e+06	1311.5	1853.5	13.9	-32.747	580.742	0
4.98613e+06	1311.5	1857.6	13.9	-32.8195	581.71	0
4986134	1311.6	1861.7	14	-32.8919	582.679	0
4.98614e+06	1311.6	1865.8	14	-32.9643	583.763	0
4.98614e+06	1311.6	1870	14	-33.0385	584.732	0
4.98615e+06	1311.7	1874	14.1	-33.1092	585.699	0
4.98615e+06	1311.7	1878.1	14.1	-33.1816	586.781	0
4.98615e+06	1311.8	1882.2	14.2	-33.2541	587.751	0
4.98616e+06	1311.8	1886.3	14.2	-33.3265	588.722	0
4.98616e+06	1311.9	1890.3	14.3	-33.3972	589.691	0
4.98617e+06	1311.9	1894.3	14.3	-33.4678	590.773	0
4.98617e+06	1311.9	1898.3	14.3	-33.5385	591.742	0
4.98617e+06	1312	1902.3	14.4	-33.6092	592.71	0
4.98618e+06	1312	1906.2	14.4	-33.6781	593.682	0
4.98618e+06	1312	1910.1	14.4	-33.747	594.768	0
4.98619e+06	1312.1	1914.1	14.5	-33.8177	595.739	0
4.98619e+06	1312.1	1918.1	14.5	-33.8883	596.71	0
4.98619e+06	1312.2	1922	14.6	-33.9572	597.792	0
4.9862e+06	1312.2	1925.9	14.6	-34.0262	598.764	0
4.9862e+06	1312.2	1929.8	14.6	-34.0951	599.733	0
4986206	1312.3	1933.7	14.7	-34.164	600.7	0
4.98621e+06	1312.3	1937.6	14.7	-34.2329	601.783	0
4.98621e+06	1312.4	1941.5	14.8	-34.3018	602.751	0
4.98622e+06	1312.4	1945.3	14.8	-34.3689	603.722	0
4.98622e+06	1312.4	1949	14.8	-34.4343	604.695	0
4.98623e+06	1312.5	1952.8	14.9	-34.5014	605.779	0
4.98623e+06	1312.5	1956.6	14.9	-34.5686	606.75	0
4.98623e+06	1312.6	1960.4	15	-34.6357	607.72	0
4.98624e+06	1312.6	1964.1	15	-34.7011	608.804	0
4.98624e+06	1312.6	1967.9	15	-34.7682	609.773	0
4.98624e+06	1312.6	1971.6	15	-34.8336	610.742	0
4.98625e+06	1312.7	1975.4	15.1	-34.9007	611.71	0
4.98625e+06	1312.7	1979.1	15.1	-34.9661	612.792	0
4986255	1312.7	1982.7	15.1	-35.0297	613.764	0
4.98626e+06	1312.8	1986.5	15.2	-35.0968	614.733	0
4.98626e+06	1312.8	1990.1	15.2	-35.1604	615.705	0
4986266	1312.8	1993.7	15.2	-35.224	616.791	0
4.98627e+06	1312.8	1997.3	15.2	-35.2876	617.763	0
4.98627e+06	1312.9	2000.9	15.3	-35.3512	618.736	0
4.98628e+06	1312.9	2004.6	15.3	-35.4166	619.708	0
4.98628e+06	1313	2008.1	15.4	-35.4784	620.792	0
4.98628e+06	1313	2011.6	15.4	-35.5403	621.763	0
4.98629e+06	1313	2015.1	15.4	-35.6021	622.736	0
4986291	1313	2018.7	15.4	-35.6657	623.71	0
4.98629e+06	1313	2022.3	15.4	-35.7293	624.794	0
4.9863e+06	1313.1	2025.8	15.5	-35.7912	625.765	0
4.9863e+06	1313.1	2029.3	15.5	-35.853	626.738	0
4986305	1313.1	2032.7	15.5	-35.913	627.71	0
4.98631e+06	1313.2	2036.2	15.6	-35.9749	628.794	0
4986312	1313.2	2039.7	15.6	-36.0367	629.765	0
4.98632e+06	1313.2	2043.1	15.6	-36.0968	630.738	0
4.98632e+06	1313.3	2046.6	15.7	-36.1586	631.824	0
4.98632e+06	1313.3	2050	15.7	-36.2187	632.794	0
4.98633e+06	1313.3	2053.3	15.7	-36.277	633.765	0
4986329	1313.3	2056.7	15.7	-36.3371	634.738	0
4.98633e+06	1313.4	2060.2	15.8	-36.3989	635.824	0
4.98634e+06	1313.4	2063.6	15.8	-36.459	636.794	0
4.98634e+06	1313.4	2067	15.8	-36.5191	637.765	0
4.98634e+06	1313.5	2070.3	15.9	-36.5774	638.738	0
4.98635e+06	1313.5	2073.6	15.9	-36.6357	639.824	0
4.98635e+06	1313.5	2076.9	15.9	-36.694	640.794	0
4.98635e+06	1313.5	2080.2	15.9	-36.7523	641.765	0
4.98636e+06	1313.6	2083.4	16	-36.8088	642.738	0
4.98636e+06	1313.6	2086.1	16	-36.8565	643.824	0
4.98636e+06	1313.6	2089.3	16	-36.913	644.794	0
4986365	1313.7	2092.7	16.1	-36.9731	645.765	0
4.98637e+06	1313.7	2096.1	16.1	-37.0332	646.738	0
4.98637e+06	1313.7	2099.3	16.1	-37.0897	647.824	0
4.98637e+06	1313.8	2102.6	16.2	-37.148	648.794	0
4986378	1313.8	2105.7	16.2	-37.2028	649.765	0
4.98638e+06	1313.8	2108.8	16.2	-37.2576	650.738	0
4.98638e+06	1313.9	2111.9	16.3	-37.3123	651.825	0
4.98639e+06	1313.9	2115	16.3	-37.3671	652.795	0
4.98639e+06	1313.9	2118	16.3	-37.4201	653.768	0
4.98639e+06	1313.9	2121	16.3	-37.4731	654.741	0
4.9864e+06	1313.9	2124	16.3	-37.5261	655.825	0
4.9864e+06	1314	2127	16.4	-37.5791	656.795	0
4.9864e+06	1314	2129.8	16.4	-37.6286	657.768	0
4.98641e+06	1314	2132.8	16.4	-37.6816	658.743	0
4.98641e+06	1314.1	2135.5	16.5	-37.7293	659.825	0
4.98641e+06	1314.1	2138.3	16.5	-37.7788	660.794	0
4.98641e+06	1314.1	2140.9	16.5	-37.8247	661.765	0
4.98642e+06	1314.1	2143.6	16.5	-37.8724	662.853	0
4.98642e+06	1314.2	2146.3	16.6	-37.9201	663.824	0
4.98642e+06	1314.2	2148.8	16.6	-37.9643	664.794	0
4.98642e+06	1314.2	2151.5	16.6	-38.012	665.765	0
4.98643e+06	1314.3	2153.9	16.7	-38.0544	666.853	0
4.98643e+06	1314.3	2156.3	16.7	-38.0968	667.824	0
4986431	1314.3	2158.7	16.7	-38.1392	668.794	0
4.98643e+06	1314.3	2161	16.7	-38.1798	669.765	0
4.98644e+06	1314.3	2163.3	16.7	-38.2204	670.853	0
4.98644e+06	1314.4	2165.6	16.8	-38.2611	671.824	0
4986440	1314.4	2167.7	16.8	-38.2982	672.794	0
4.98644e+06	1314.4	2169.8	16.8	-38.3353	673.765	0
4.98644e+06	1314.4	2171.9	16.8	-38.3724	674.853	0
4.98645e+06	1314.5	2174	16.9	-38.4095	675.824	0
4.98645e+06	1314.5	2176	16.9	-38.4448	676.794	0
4.98645e+06	1314.5	2177.8	16.9	-38.4766	677.765	0
4986452	1314.5	2179.7	16.9	-38.5102	678.853	0
4.98645e+06	1314.5	2181.6	16.9	-38.5438	679.824	0
4.98646e+06	1314.6	2183.1	17	-38.5703	680.794	0
4.98646e+06	1314.6	2185	17	-38.6038	681.765	0
4.98646e+06	1314.6	2186.8	17	-38.6356	682.853	0
4986461	1314.6	2188.7	17	-38.6692	683.824	0
4.98646e+06	1314.6	2190.5	17	-38.701	684.794	0
4.98646e+06	1314.6	2192.3	17	-38.7328	685.767	0
4.98647e+06	1314.6	2194.2	17	-38.7664	686.855	0
4.98647e+06	1314.6	2196.1	17	-38.8	687.824	0
4.98647e+06	1314.6	2198.1	17	-38.8353	688.794	0
4.98647e+06	1314.7	2200.2	17.1	-38.8724	689.765	0
4.98647e+06	1314.7	2202.5	17.1	-38.913	690.853	0
4.98648e+06	1314.7	2204.6	17.1	-38.9501	691.824	0
4986479	1314.7	2206.7	17.1	-38.9872	692.794	0
4.98648e+06	1314.7	2209	17.1	-39.0279	693.878	0
4.98648e+06	1314.8	2211.4	17.2	-39.0703	694.851	0
4.98649e+06	1314.8	2213.8	17.2	-39.1127	695.824	0
4.98649e+06	1314.8	2216.4	17.2	-39.1586	696.794	0
4.98649e+06	1314.8	2219	17.2	-39.2045	697.878	0
4986494	1314.8	2221.7	17.2	-39.2522	698.851	0
4.9865e+06	1314.8	2224.4	17.2	-39.3	699.824	0
4.9865e+06	1314.9	2227.3	17.3	-39.3512	700.794	0
4.9865e+06	1314.9	2230.1	17.3	-39.4006	701.889	0
4.98651e+06	1314.9	2233.1	17.3	-39.4537	702.863	0
4.98651e+06	1314.9	2236	17.3	-39.5049	703.835	0
4.98651e+06	1315	2239.1	17.4	-39.5597	704.806	0
4.98651e+06	1315	2242.3	17.4	-39.6162	705.894	0
4.98652e+06	1315	2245.5	17.4	-39.6727	706.865	0
4986521	1315	2248.7	17.4	-39.7293	707.835	0
4.98652e+06	1315.1	2252.1	17.5	-39.7893	708.806	0
4.98653e+06	1315.1	2255.6	17.5	-39.8512	709.894	0
4.98653e+06	1315.1	2259.1	17.5	-39.913	710.865	0
4986535	1315.1	2262.7	17.5	-39.9766	711.835	0
4.98654e+06	1315.2	2266.3	17.6	-40.0402	712.806	0
4.98654e+06	1315.2	2270.1	17.6	-40.1074	713.894	0
4.98655e+06	1315.2	2273.8	17.6	-40.1727	714.865	0
4986550	1315.3	2277.7	17.7	-40.2416	715.835	0
4.98655e+06	1315.3	2281.6	17.7	-40.3105	716.806	0
4.98656e+06	1315.3	2285.6	17.7	-40.3812	717.894	0
4.98656e+06	1315.4	2289.6	17.8	-40.4519	718.865	0
4986566	1315.4	2293.7	17.8	-40.5243	719.835	0
4.98657e+06	1315.4	2297.8	17.8	-40.5968	720.806	0
4.98657e+06	1315.5	2302.1	17.9	-40.6727	721.894	0
4.98658e+06	1315.5	2306.4	17.9	-40.7487	722.865	0
4.98658e+06	1315.6	2310.6	18	-40.8229	723.835	0
4.98659e+06	1315.6	2315	18	-40.9006	724.806	0
4.98659e+06	1315.6	2319.4	18	-40.9784	725.894	0
4.9866e+06	1315.6	2323.8	18	-41.0561	726.865	0
4.9866e+06	1315.7	2328.3	18.1	-41.1356	727.835	0
4.98661e+06	1315.7	2332.9	18.1	-41.2169	728.808	0
4.98661e+06	1315.7	2337.6	18.1	-41.2999	729.896	0
4.98661e+06	1315.8	2342.3	18.2	-41.383	730.867	0
4.98662e+06	1315.8	2346.9	18.2	-41.4642	731.835	0
4.98662e+06	1315.9	2351.6	18.3	-41.5473	732.806	0
4.98663e+06	1315.9	2356.5	18.3	-41.6338	733.894	0
4.98663e+06	1315.9	2361.2	18.3	-41.7169	734.865	0
4.98664e+06	1316	2366	18.4	-41.8017	735.835	0
4.98664e+06	1316	2370.9	18.4	-41.8883	736.919	0
4.98665e+06	1316.1	2375.8	18.5	-41.9748	737.89	0
4.98665e+06	1316.1	2380.8	18.5	-42.0632	738.864	0
4.98666e+06	1316.1	2385.8	18.5	-42.1515	739.834	0
4.98666e+06	1316.2	2390.8	18.6	-42.2398	740.918	0
4.98667e+06	1316.2	2395.8	18.6	-42.3282	741.889	0
4.98667e+06	1316.2	2400.9	18.6	-42.4183	742.858	0
4.98668e+06	1316.2	2406	18.6	-42.5084	743.825	0
4.98668e+06	1316.3	2411.1	18.7	-42.5985	744.907	0
4.98669e+06	1316.3	2416.4	18.7	-42.6921	745.877	0
4.98669e+06	1316.4	2421.5	18.8	-42.7822	746.847	0
4986699	1316.4	2426.7	18.8	-42.8741	747.931	0
4.9867e+06	1316.4	2432	18.8	-42.9678	748.9	0
4.98671e+06	1316.5	2437.3	18.9	-43.0614	749.87	0
4.98671e+06	1316.5	2442.6	18.9	-43.155	750.836	0
4.98672e+06	1316.6	2447.8	19	-43.2469	751.919	0
4.98673e+06	1316.6	2453.1	19	-43.3405	752.888	0
4.98673e+06	1316.6	2458.6	19	-43.4377	753.856	0
4.98674e+06	1316.6	2463.8	19	-43.5296	754.827	0
4.98674e+06	1316.7	2469.3	19.1	-43.6268	755.909	0
4986747	1316.7	2474.7	19.1	-43.7222	756.877	0
4.98675e+06	1316.7	2480.1	19.1	-43.8176	757.848	0
4.98676e+06	1316.8	2485.5	19.2	-43.913	758.937	0
4.98676e+06	1316.8	2491	19.2	-44.0101	759.908	0
4.98677e+06	1316.8	2496.5	19.2	-44.1073	760.878	0
4.98677e+06	1316.9	2501.9	19.3	-44.2027	761.851	0
4.98678e+06	1316.9	2507.5	19.3	-44.3017	762.939	0
4.98679e+06	1317	2513	19.4	-44.3988	763.908	0
4.98679e+06	1317	2518.5	19.4	-44.496	764.878	0
4.9868e+06	1317	2524.1	19.4	-44.5949	765.851	0
4.9868e+06	1317.1	2529.6	19.5	-44.6921	766.939	0
4.98681e+06	1317.1	2535.1	19.5	-44.7893	767.908	0
4986813	1317.1	2540.7	19.5	-44.8882	768.878	0
4.98682e+06	1317.1	2546.4	19.5	-44.9889	769.851	0
4.98682e+06	1317.2	2551.9	19.6	-45.0861	770.939	0
4.98683e+06	1317.2	2557.5	19.6	-45.185	771.908	0
4.98684e+06	1317.3	2563.1	19.7	-45.284	772.878	0
4986841	1317.3	2568.7	19.7	-45.3829	773.851	0
4.98685e+06	1317.4	2574.4	19.8	-45.4836	774.939	0
4.98685e+06	1317.4	2580	19.8	-45.5826	775.908	0
4.98686e+06	1317.4	2585.6	19.8	-45.6815	776.878	0
4.98686e+06	1317.5	2591.2	19.9	-45.7804	777.851	0
4.98687e+06	1317.5	2596.9	19.9	-45.8811	778.939	0
4.98687e+06	1317.6	2602.6	20	-45.9819	779.908	0
4.98688e+06	1317.7	2608.2	20.1	-46.0808	780.878	0
4.98689e+06	1317.7	2613.8	20.1	-46.1797	781.855	0
4.98689e+06	1317.8	2619.6	20.2	-46.2822	782.939	0
4.9869e+06	1317.8	2625.1	20.2	-46.3794	783.908	0
4.9869e+06	1317.8	2630.8	20.2	-46.4801	784.878	0
4.98691e+06	1317.8	2636.6	20.2	-46.5825	785.964	0
4.98691e+06	1317.9	2642.2	20.3	-46.6815	786.937	0
4.98692e+06	1317.9	2647.9	20.3	-46.7822	787.908	0
4.98693e+06	1317.9	2653.6	20.3	-46.8829	788.878	0
4.98693e+06	1318	2659.3	20.4	-46.9836	789.964	0
4.98694e+06	1318	2665	20.4	-47.0843	790.937	0
4986943	1318.1	2670.7	20.5	-47.185	791.908	0
4.98695e+06	1318.1	2676.3	20.5	-47.284	792.877	0
4.98695e+06	1318.2	2682.1	20.6	-47.3864	793.961	0
4986960	1318.2	2687.7	20.6	-47.4854	794.932	0
4.98697e+06	1318.3	2693.5	20.7	-47.5878	795.905	0
4.98697e+06	1318.3	2699.1	20.7	-47.6868	796.877	0
4.98698e+06	1318.4	2704.8	20.8	-47.7875	797.961	0
4.98698e+06	1318.4	2710.5	20.8	-47.8882	798.934	0
4.98699e+06	1318.4	2716.1	20.8	-47.9871	799.907	0
4.98699e+06	1318.5	2721.9	20.9	-48.0896	800.877	0
4.987e+06	1318.5	2727.6	20.9	-48.1903	801.972	0
4.98701e+06	1318.5	2733.3	20.9	-48.291	802.945	0
4.98701e+06	1318.6	2738.9	21	-48.39	803.918	0
4987017	1318.6	2744.7	21	-48.4924	804.889	0
4.98702e+06	1318.7	2750.3	21.1	-48.5914	805.977	0
4.98703e+06	1318.7	2756	21.1	-48.6921	806.948	0
4987034	1318.7	2761.7	21.1	-48.7928	807.918	0
4.98704e+06	1318.8	2767.4	21.2	-48.8935	808.889	0
4.98705e+06	1318.8	2773	21.2	-48.9924	809.977	0
4987051	1318.9	2778.7	21.3	-49.0931	810.948	0
4.98706e+06	1318.9	2784.4	21.3	-49.1938	811.918	0
4.98706e+06	1318.9	2790	21.3	-49.2928	812.889	0
4987068	1319	2795.7	21.4	-49.3935	813.977	0
4.98707e+06	1319	2801.4	21.4	-49.4942	814.948	0
4.98708e+06	1319	2807	21.4	-49.5931	815.918	0
4987085	1319.1	2812.7	21.5	-49.6938	816.889	0
4.98709e+06	1319.1	2818.3	21.5	-49.7928	817.977	0
4.9871e+06	1319.1	2823.9	21.5	-49.8917	818.948	0
4.9871e+06	1319.2	2829.6	21.6	-49.9924	819.918	0
4.98711e+06	1319.2	2835.3	21.6	-50.0931	820.891	0
4.98711e+06	1319.3	2840.8	21.7	-50.1903	821.979	0
4.98712e+06	1319.3	2846.5	21.7	-50.291	822.95	0
4.98712e+06	1319.4	2852	21.8	-50.3882	823.92	0
4987130	1319.4	2857.7	21.8	-50.4889	824.895	0
4.98714e+06	1319.4	2863.3	21.8	-50.5878	825.981	0
4.98714e+06	1319.5	2868.8	21.9	-50.685	826.95	0
4.98715e+06	1319.5	2874.5	21.9	-50.7857	827.92	0
4.98715e+06	1319.5	2880	21.9	-50.8829	828.893	0
4.98716e+06	1319.5	2885.6	21.9	-50.9818	829.981	0
4.98716e+06	1319.6	2891.1	22	-51.079	830.95	0
4987169	1319.6	2896.7	22	-51.1779	831.92	0
4.98717e+06	1319.6	2902.3	22	-51.2769	833.006	0
4.98718e+06	1319.6	2907.8	22	-51.374	833.979	0
4.98719e+06	1319.7	2913.4	22.1	-51.473	834.95	0
4.98719e+06	1319.7	2918.8	22.1	-51.5684	835.92	0
4.9872e+06	1319.7	2924.5	22.1	-51.6691	837.006	0
4.9872e+06	1319.8	2929.9	22.2	-51.7645	837.979	0
4.98721e+06	1319.8	2935.4	22.2	-51.8616	838.95	0
4.98721e+06	1319.8	2941	22.2	-51.9606	839.92	0
4.98722e+06	1319.8	2946.5	22.2	-52.0578	841.006	0
4.98722e+06	1319.9	2951.9	22.3	-52.1532	841.979	0
4.98723e+06	1319.9	2957.5	22.3	-52.2521	842.95	0
4.98724e+06	1319.9	2962.8	22.3	-52.3458	843.92	0
4.98724e+06	1319.9	2968.3	22.3	-52.4429	845.006	0
4.98725e+06	1320	2973.8	22.4	-52.5401	845.979	0
4.98725e+06	1320	2979.2	22.4	-52.6355	846.95	0
4987257	1320	2984.7	22.4	-52.7327	847.92	0
4.98726e+06	1320.1	2990.1	22.5	-52.8281	849.006	0
4.98727e+06	1320.1	2995.6	22.5	-52.9252	849.98	0
4.98727e+06	1320.1	3000.9	22.5	-53.0189	850.949	0
4.98728e+06	1320.1	3006.3	22.5	-53.1143	851.927	0
4987284	1320.2	3011.7	22.6	-53.2097	853.013	0
4.98729e+06	1320.2	3017.1	22.6	-53.3051	853.986	0
4.98729e+06	1320.3	3022.5	22.7	-53.4005	854.958	0
4.9873e+06	1320.3	3027.8	22.7	-53.4941	855.929	0
4.98731e+06	1320.3	3033.3	22.7	-53.5913	857.015	0
4.98731e+06	1320.3	3038.6	22.7	-53.685	857.988	0
4.98732e+06	1320.3	3043.9	22.7	-53.7786	858.96	0
4.98732e+06	1320.4	3049.3	22.8	-53.874	859.931	0
4.98733e+06	1320.4	3054.6	22.8	-53.9676	861.019	0
4.98733e+06	1320.4	3059.9	22.8	-54.0613	861.99	0
4.98734e+06	1320.5	3065.1	22.9	-54.1531	862.96	0
4.98734e+06	1320.5	3070.5	22.9	-54.2486	863.931	0
4.98735e+06	1320.5	3075.8	22.9	-54.3422	865.019	0
4.98735e+06	1320.6	3081	23	-54.4341	865.99	0
4.98736e+06	1320.6	3086.3	23	-54.5277	866.96	0
4.98736e+06	1320.6	3091.5	23	-54.6196	867.933	0
4987369	1320.7	3096.7	23.1	-54.7114	869.021	0
4.98737e+06	1320.7	3102	23.1	-54.8051	869.992	0
4.98738e+06	1320.7	3107.1	23.1	-54.8952	870.96	0
4.98738e+06	1320.7	3112.4	23.1	-54.9888	871.931	0
4.98739e+06	1320.8	3117.6	23.2	-55.0807	873.019	0
4987395	1320.8	3122.7	23.2	-55.1708	873.99	0
4.9874e+06	1320.8	3127.8	23.2	-55.2609	874.96	0
4.98741e+06	1320.8	3133	23.2	-55.3528	876.044	0
4.98741e+06	1320.9	3138.1	23.3	-55.4429	877.015	0
4.98742e+06	1320.9	3143.2	23.3	-55.533	877.988	0
4.98742e+06	1321	3148.3	23.4	-55.6231	878.96	0
4.98743e+06	1321	3153.4	23.4	-55.7132	880.044	0
4.98743e+06	1321	3158.5	23.4	-55.8033	881.015	0
4.98744e+06	1321.1	3163.6	23.5	-55.8934	881.988	0
4.98744e+06	1321.1	3168.6	23.5	-55.9817	882.96	0
4.98745e+06	1321.1	3173.6	23.5	-56.0701	884.044	0
4987451	1321.1	3178.7	23.5	-56.1602	885.015	0
4987456	1321.2	3183.7	23.6	-56.2485	885.988	0
4987461	1321.2	3188.7	23.6	-56.3369	886.96	0
4987466	1321.2	3193.7	23.6	-56.4252	888.044	0
4987471	1321.3	3198.7	23.7	-56.5136	889.015	0
4.98748e+06	1321.3	3203.6	23.7	-56.6001	889.988	0
4.98748e+06	1321.3	3208.6	23.7	-56.6885	890.96	0
4.98749e+06	1321.4	3213.6	23.8	-56.7768	892.044	0
4.98749e+06	1321.4	3218.5	23.8	-56.8634	893.015	0
4.9875e+06	1321.4	3223.5	23.8	-56.9517	893.988	0
4.9875e+06	1321.4	3228.3	23.8	-57.0365	894.96	0
4.98751e+06	1321.5	3233.3	23.9	-57.1249	896.045	0
4.98751e+06	1321.5	3238.1	23.9	-57.2097	897.018	0
4.98752e+06	1321.5	3242.9	23.9	-57.2945	897.991	0
4.98752e+06	1321.5	3247.8	23.9	-57.381	898.961	0
4.98752e+06	1321.6	3252.6	24	-57.4658	900.045	0
4.98753e+06	1321.6	3257.5	24	-57.5524	901.023	0
4.98753e+06	1321.6	3262.3	24	-57.6372	901.992	0
4.98754e+06	1321.6	3267	24	-57.7203	902.964	0
4.98754e+06	1321.6	3271.9	24	-57.8068	904.052	0
4987549	1321.7	3276.7	24.1	-57.8916	905.023	0
4.98755e+06	1321.7	3281.4	24.1	-57.9747	905.992	0
4.98756e+06	1321.7	3286.1	24.1	-58.0577	906.962	0
4.98756e+06	1321.8	3291	24.2	-58.1443	908.048	0
4987568	1321.8	3295.7	24.2	-58.2273	909.021	0
4.98757e+06	1321.8	3300.3	24.2	-58.3086	909.992	0
4.98758e+06	1321.9	3305.1	24.3	-58.3934	911.074	0
4987582	1321.9	3309.7	24.3	-58.4747	912.044	0
4.98759e+06	1321.9	3314.5	24.3	-58.5595	913.015	0
4.98759e+06	1321.9	3319.1	24.3	-58.6407	913.988	0
4987596	1322	3323.7	24.4	-58.722	915.074	0
4.9876e+06	1322	3328.4	24.4	-58.805	916.044	0
4.98761e+06	1322	3333	24.4	-58.8863	917.015	0
4.98761e+06	1322	3337.6	24.4	-58.9676	917.988	0
4.98761e+06	1322.1	3342.2	24.5	-59.0489	919.074	0
4.98762e+06	1322.1	3346.8	24.5	-59.1301	920.044	0
4.98762e+06	1322.1	3351.5	24.5	-59.2132	921.015	0
4.98763e+06	1322.2	3355.9	24.6	-59.2909	921.988	0
4.98763e+06	1322.2	3360.5	24.6	-59.3722	923.074	0
4.98764e+06	1322.2	3365	24.6	-59.4517	924.044	0
4.98764e+06	1322.2	3369.6	24.6	-59.5329	925.015	0
4.98765e+06	1322.3	3374.1	24.7	-59.6125	925.988	0
4.98765e+06	1322.3	3378.6	24.7	-59.692	927.074	0
4.98766e+06	1322.3	3383.1	24.7	-59.7715	928.044	0
4.98766e+06	1322.3	3387.5	24.7	-59.8492	929.015	0
4.98766e+06	1322.4	3392	24.8	-59.9287	929.988	0
4.98767e+06	1322.4	3396.5	24.8	-60.0082	931.074	0
4.98767e+06	1322.4	3400.9	24.8	-60.0859	932.044	0
4.98768e+06	1322.4	3405.3	24.8	-60.1637	933.015	0
4987682	1322.4	3409.7	24.8	-60.2414	933.99	0
4.98769e+06	1322.5	3414.1	24.9	-60.3192	935.074	0
4.98769e+06	1322.5	3418.5	24.9	-60.3969	936.044	0
4.9877e+06	1322.5	3422.8	24.9	-60.4729	937.015	0
4.9877e+06	1322.5	3427.1	24.9	-60.5488	937.99	0
4.9877e+06	1322.5	3431.6	24.9	-60.6283	939.074	0
4.98771e+06	1322.6	3435.9	25	-60.7043	940.044	0
4.98771e+06	1322.6	3440.2	25	-60.7803	941.018	0
4.98772e+06	1322.6	3444.6	25	-60.858	942.106	0
4.98772e+06	1322.6	3448.8	25	-60.9322	943.075	0
4.98773e+06	1322.7	3453.1	25.1	-61.0082	944.045	0
4.98773e+06	1322.7	3457.3	25.1	-61.0824	945.018	0
4.98773e+06	1322.7	3461.6	25.1	-61.1584	946.106	0
4.98774e+06	1322.7	3465.8	25.1	-61.2326	947.075	0
4.98774e+06	1322.7	3470.1	25.1	-61.3085	948.045	0
4.98775e+06	1322.8	3474.3	25.2	-61.3828	949.018	0
4.98775e+06	1322.8	3478.5	25.2	-61.457	950.106	0
4987755	1322.8	3482.7	25.2	-61.5312	951.075	0
4.98776e+06	1322.8	3486.9	25.2	-61.6054	952.045	0
4.98776e+06	1322.9	3491	25.3	-61.6778	953.018	0
4.98777e+06	1322.9	3495.2	25.3	-61.752	954.106	0
4.98777e+06	1322.9	3499.3	25.3	-61.8244	955.075	0
4.98778e+06	1322.9	3503.4	25.3	-61.8969	956.045	0
4.98778e+06	1323	3507.5	25.4	-61.9693	957.018	0
4.98778e+06	1323	3511.6	25.4	-62.0418	958.106	0
4987788	1323	3515.7	25.4	-62.1142	959.075	0
4.98779e+06	1323	3519.8	25.4	-62.1866	960.045	0
4.9878e+06	1323	3523.8	25.4	-62.2573	961.018	0
4.9878e+06	1323	3527.9	25.4	-62.3297	962.106	0
4.9878e+06	1323.1	3532	25.5	-62.4022	963.075	0
4.98781e+06	1323.1	3536	25.5	-62.4729	964.045	0
4.98781e+06	1323.1	3540	25.5	-62.5435	965.022	0
4.98782e+06	1323.2	3544	25.6	-62.6142	966.106	0
4.98782e+06	1323.2	3548	25.6	-62.6849	967.075	0
4.98782e+06	1323.2	3552	25.6	-62.7555	968.045	0
4.98783e+06	1323.3	3556	25.7	-62.8262	969.02	0
4.98783e+06	1323.3	3559.9	25.7	-62.8951	970.106	0
4.98784e+06	1323.3	3563.8	25.7	-62.964	971.075	0
4.98784e+06	1323.4	3567.8	25.8	-63.0347	972.045	0
4987844	1323.4	3571.7	25.8	-63.1036	973.131	0
4.98785e+06	1323.4	3575.6	25.8	-63.1725	974.104	0
4.98785e+06	1323.4	3579.5	25.8	-63.2414	975.075	0
4.98786e+06	1323.4	3583.4	25.8	-63.3103	976.045	0
4.98786e+06	1323.5	3587.2	25.9	-63.3774	977.131	0
4.98786e+06	1323.5	3591	25.9	-63.4446	978.104	0
4.98787e+06	1323.5	3594.8	25.9	-63.5117	979.075	0
4987871	1323.6	3598.7	26	-63.5806	980.045	0
4.98787e+06	1323.6	3602.5	26	-63.6478	981.131	0
4.98788e+06	1323.6	3606.3	26	-63.7149	982.104	0
4.98788e+06	1323.7	3610	26.1	-63.7803	983.075	0
4.98789e+06	1323.7	3613.8	26.1	-63.8474	984.045	0
4.98789e+06	1323.7	3617.6	26.1	-63.9145	985.131	0
4.98789e+06	1323.7	3621.4	26.1	-63.9817	986.104	0
4.9879e+06	1323.8	3625	26.2	-64.0453	987.075	0
4987901	1323.8	3628.7	26.2	-64.1106	988.045	0
4.9879e+06	1323.9	3632.5	26.3	-64.1778	989.131	0
4.98791e+06	1323.9	3636.1	26.3	-64.2414	990.104	0
4.98791e+06	1323.9	3639.8	26.3	-64.3067	991.075	0
4.98792e+06	1323.9	3643.5	26.3	-64.3721	992.045	0
4.98792e+06	1323.9	3647.1	26.3	-64.4357	993.131	0
4987923	1324	3650.7	26.4	-64.4993	994.104	0
4.98793e+06	1324	3654.3	26.4	-64.5629	995.075	0
4.98793e+06	1324	3658	26.4	-64.6283	996.047	0
4.98793e+06	1324	3661.6	26.4	-64.6919	997.135	0
4.98794e+06	1324.1	3665	26.5	-64.752	998.106	0
4.98794e+06	1324.2	3668.5	26.6	-64.8138	999.075	0
4.98794e+06	1324.2	3672	26.6	-64.8756	1000.05	0
4.98795e+06	1324.2	3675.6	26.6	-64.9393	1001.14	0
4.98795e+06	1324.3	3679.1	26.7	-65.0011	1002.11	0
4987955	1324.3	3682.7	26.7	-65.0647	1003.09	0
4.98796e+06	1324.3	3686.1	26.7	-65.1248	1004.06	0
4987962	1324.3	3689.7	26.7	-65.1884	1005.14	0
4.98797e+06	1324.3	3693.1	26.7	-65.2484	1006.12	0
4987969	1324.4	3696.7	26.8	-65.312	1007.09	0
4.98797e+06	1324.4	3700.1	26.8	-65.3721	1008.06	0
4.98798e+06	1324.4	3703.6	26.8	-65.4339	1009.15	0
4.98798e+06	1324.4	3707.1	26.8	-65.4958	1010.12	0
4.98798e+06	1324.4	3710.5	26.8	-65.5559	1011.09	0
4.98799e+06	1324.5	3713.9	26.9	-65.6159	1012.06	0
4.98799e+06	1324.5	3717.3	26.9	-65.676	1013.14	0
4987993	1324.5	3720.7	26.9	-65.7361	1014.12	0
4.988e+06	1324.5	3724.2	26.9	-65.7979	1015.09	0
4.988e+06	1324.6	3727.5	27	-65.8562	1016.17	0
4.988e+06	1324.6	3730.8	27	-65.9145	1017.14	0
4.98801e+06	1324.6	3734.2	27	-65.9746	1018.11	0
4.98801e+06	1324.6	3737.6	27	-66.0346	1019.08	0
4.98801e+06	1324.6	3741	27	-66.0947	1020.17	0
4.98802e+06	1324.6	3744.3	27	-66.153	1021.14	0
4.98802e+06	1324.7	3747.6	27.1	-66.2113	1022.11	0
4.98802e+06	1324.7	3750.8	27.1	-66.2679	1023.08	0
4.98803e+06	1324.7	3754.1	27.1	-66.3262	1024.17	0
4.98803e+06	1324.7	3757.4	27.1	-66.3845	1025.14	0
4.98803e+06	1324.7	3760.6	27.1	-66.441	1026.11	0
4.98804e+06	1324.8	3763.8	27.2	-66.4975	1027.08	0
4.98804e+06	1324.8	3767	27.2	-66.5541	1028.17	0
4.98804e+06	1324.8	3770.3	27.2	-66.6124	1029.14	0
4.98805e+06	1324.9	3773.5	27.3	-66.6689	1030.11	0
4988049	1324.9	3776.7	27.3	-66.7255	1031.08	0
4.98805e+06	1324.9	3779.8	27.3	-66.7802	1032.17	0
4.98806e+06	1324.9	3783	27.3	-66.8368	1033.14	0
4.98806e+06	1324.9	3786.1	27.3	-66.8915	1034.11	0
4.98806e+06	1324.9	3789.4	27.3	-66.9498	1035.08	0
4.98806e+06	1325	3792.5	27.4	-67.0046	1036.17	0
4.98807e+06	1325	3795.5	27.4	-67.0576	1037.14	0
4988071	1325	3798.7	27.4	-67.1141	1038.11	0
4988074	1325.1	3801.7	27.5	-67.1672	1039.08	0
4.98808e+06	1325.1	3804.9	27.5	-67.2237	1040.17	0
4.98808e+06	1325.1	3807.9	27.5	-67.2767	1041.14	0
4.98808e+06	1325.1	3811	27.5	-67.3315	1042.11	0
4.98809e+06	1325.1	3814.1	27.5	-67.3862	1043.09	0
4.98809e+06	1325.2	3817.1	27.6	-67.4392	1044.18	0
4.98809e+06	1325.2	3820	27.6	-67.4905	1045.15	0
4.9881e+06	1325.2	3823.1	27.6	-67.5452	1046.12	0
4.9881e+06	1325.2	3826	27.6	-67.5965	1047.09	0
4.9881e+06	1325.3	3829.1	27.7	-67.6512	1048.17	0
4.9881e+06	1325.3	3832	27.7	-67.7025	1049.15	0
4.98811e+06	1325.3	3835	27.7	-67.7555	1050.12	0
4.98811e+06	1325.3	3837.9	27.7	-67.8067	1051.2	0
4.98811e+06	1325.3	3840.8	27.7	-67.858	1052.17	0
4.98812e+06	1325.4	3843.8	27.8	-67.911	1053.14	0
4.98812e+06	1325.4	3846.8	27.8	-67.964	1054.11	0
4.98812e+06	1325.4	3849.6	27.8	-68.0134	1055.2	0
4.98812e+06	1325.4	3852.6	27.8	-68.0664	1056.17	0
4.98813e+06	1325.4	3855.5	27.8	-68.1177	1057.14	0
4.98813e+06	1325.4	3858.3	27.8	-68.1671	1058.11	0
4.98813e+06	1325.4	3861.1	27.8	-68.2166	1059.2	0
4.98814e+06	1325.5	3864	27.9	-68.2678	1060.17	0
4.98814e+06	1325.5	3866.8	27.9	-68.3173	1061.14	0
4988142	1325.5	3869.7	27.9	-68.3685	1062.11	0
4.98814e+06	1325.5	3872.5	27.9	-68.418	1063.2	0
4.98815e+06	1325.5	3875.3	27.9	-68.4675	1064.17	0
4.98815e+06	1325.5	3878.1	27.9	-68.517	1065.14	0
4.98815e+06	1325.5	3880.9	27.9	-68.5664	1066.11	0
4.98816e+06	1325.6	3883.6	28	-68.6141	1067.2	0
4.98816e+06	1325.6	3886.3	28	-68.6618	1068.17	0
4.98816e+06	1325.6	3889.1	28	-68.7113	1069.14	0
4.98816e+06	1325.6	3891.9	28	-68.7608	1070.11	0
4.98817e+06	1325.6	3894.6	28	-68.8085	1071.2	0
4.98817e+06	1325.6	3897.3	28	-68.8562	1072.17	0
4.98817e+06	1325.6	3900	28	-68.9039	1073.14	0
4988175	1325.6	3902.7	28	-68.9516	1074.12	0
4.98818e+06	1325.7	3905.3	28.1	-68.9975	1075.2	0
4.98818e+06	1325.7	3908.1	28.1	-69.047	1076.17	0
4988183	1325.7	3910.7	28.1	-69.0929	1077.14	0
4.98819e+06	1325.7	3913.4	28.1	-69.1406	1078.12	0
4.98819e+06	1325.7	3916	28.1	-69.1866	1079.2	0
4.98819e+06	1325.7	3918.6	28.1	-69.2325	1080.17	0
4.98819e+06	1325.7	3921.1	28.1	-69.2767	1081.14	0
4.9882e+06	1325.8	3923.8	28.2	-69.3244	1082.23	0
4.9882e+06	1325.8	3926.5	28.2	-69.3721	1083.2	0
4.9882e+06	1325.8	3928.9	28.2	-69.4145	1084.17	0
4.9882e+06	1325.8	3931.5	28.2	-69.4604	1085.14	0
4.98821e+06	1325.8	3934.1	28.2	-69.5063	1086.23	0
4988209	1325.8	3936.7	28.2	-69.5523	1087.2	0
4.98821e+06	1325.8	3939.1	28.2	-69.5947	1088.17	0
4988214	1325.8	3941.7	28.2	-69.6406	1089.14	0
4.98822e+06	1325.9	3944.3	28.3	-69.6866	1090.23	0
4.98822e+06	1325.9	3946.8	28.3	-69.7307	1091.2	0
4.98822e+06	1325.9	3949.3	28.3	-69.7749	1092.17	0
4988224	1325.9	3951.7	28.3	-69.8173	1093.14	0
4.98823e+06	1325.9	3954.3	28.3	-69.8632	1094.23	0
4988229	1325.9	3956.7	28.3	-69.9056	1095.2	0
4.98823e+06	1326	3959.1	28.4	-69.948	1096.17	0
4.98823e+06	1326	3961.6	28.4	-69.9922	1097.14	0
4.98824e+06	1326	3963.8	28.4	-70.0311	1098.23	0
4988236	1326.2	3963.7	28.6	-70.0293	1099.2	0
4.98824e+06	1326.1	3965.8	28.5	-70.0664	1100.17	0
4.98824e+06	1326.2	3968.5	28.6	-70.1141	1101.15	0
4.98824e+06	1326.2	3971	28.6	-70.1583	1102.23	0
4.98825e+06	1326.2	3973.6	28.6	-70.2042	1103.2	0
4.98825e+06	1326.2	3976.1	28.6	-70.2484	1104.18	0
4.98825e+06	1326.2	3978.6	28.6	-70.2926	1105.15	0
4.98825e+06	1326.2	3981	28.6	-70.335	1106.23	0
4.98826e+06	1326.2	3983.4	28.6	-70.3774	1107.2	0
4.98826e+06	1326.2	3985.9	28.6	-70.4215	1108.18	0
4.98826e+06	1326.2	3988.2	28.6	-70.4622	1109.15	0
4.98826e+06	1326.2	3990.5	28.6	-70.5028	1110.23	0
4.98827e+06	1326.3	3992.8	28.7	-70.5434	1111.2	0
4.98827e+06	1326.3	3995	28.7	-70.5823	1112.18	0
4.98827e+06	1326.3	3997.1	28.7	-70.6194	1113.15	0
4.98827e+06	1326.3	3999.4	28.7	-70.66	1114.23	0
4.98827e+06	1326.3	4001.4	28.7	-70.6954	1115.2	0
4.98828e+06	1326.3	4003.4	28.7	-70.7307	1116.18	0
4.98828e+06	1326.3	4005.3	28.7	-70.7643	1117.15	0
4.98828e+06	1326.4	4007.3	28.8	-70.7996	1118.24	0
4.98828e+06	1326.4	4009.1	28.8	-70.8314	1119.21	0
4.98828e+06	1326.4	4010.9	28.8	-70.8632	1120.18	0
4988285	1326.4	4012.7	28.8	-70.895	1121.16	0
4.98829e+06	1326.4	4014.5	28.8	-70.9268	1122.24	0
4.98829e+06	1326.4	4016	28.8	-70.9533	1123.21	0
4.98829e+06	1326.4	4017.6	28.8	-70.9816	1124.18	0
4.98829e+06	1326.4	4019.1	28.8	-71.0081	1125.15	0
4.98829e+06	1326.4	4020.6	28.8	-71.0346	1126.24	0
4.98829e+06	1326.5	4022	28.9	-71.0593	1127.21	0
4.9883e+06	1326.5	4023.3	28.9	-71.0823	1128.18	0
4.9883e+06	1326.5	4024.6	28.9	-71.1053	1129.27	0
4988298	1326.5	4025.7	28.9	-71.1247	1130.24	0
4.9883e+06	1326.5	4026.8	28.9	-71.1441	1131.21	0
4988300	1326.5	4027.7	28.9	-71.16	1132.18	0
4.9883e+06	1326.5	4028.8	28.9	-71.1795	1133.27	0
4.9883e+06	1326.5	4029.8	28.9	-71.1971	1134.24	0
4988303	1326.6	4030.7	29	-71.213	1135.21	0
4.9883e+06	1326.6	4031.6	29	-71.2289	1136.18	0
4.9883e+06	1326.5	4032.6	28.9	-71.2466	1137.27	0
4.98831e+06	1326.6	4033.5	29	-71.2625	1138.24	0
4.98831e+06	1326.6	4034.5	29	-71.2802	1139.21	0
4.98831e+06	1326.6	4035.6	29	-71.2996	1140.18	0
4.98831e+06	1326.6	4036.6	29	-71.3173	1141.27	0
4.98831e+06	1326.6	4037.6	29	-71.335	1142.24	0
4988311	1326.6	4038.7	29	-71.3544	1143.21	0
4.98831e+06	1326.6	4040	29	-71.3774	1144.18	0
4.98831e+06	1326.6	4041.2	29	-71.3986	1145.27	0
4.98831e+06	1326.7	4042.5	29.1	-71.4215	1146.24	0
4.98832e+06	1326.7	4043.8	29.1	-71.4445	1147.21	0
4.98832e+06	1326.7	4045.4	29.1	-71.4728	1148.18	0
4.98832e+06	1326.7	4046.8	29.1	-71.4975	1149.27	0
4.98832e+06	1326.7	4048.5	29.1	-71.5275	1150.24	0
4.98832e+06	1326.7	4050.1	29.1	-71.5558	1151.21	0
4.98832e+06	1326.7	4051.8	29.1	-71.5858	1152.18	0
4988326	1326.8	4053.7	29.2	-71.6194	1153.27	0
4.98833e+06	1326.8	4055.6	29.2	-71.653	1154.24	0
4.98833e+06	1326.8	4057.5	29.2	-71.6865	1155.21	0
4.98833e+06	1326.8	4059.5	29.2	-71.7219	1156.18	0
4.98833e+06	1326.8	4061.5	29.2	-71.7572	1157.27	0
4.98834e+06	1326.9	4063.6	29.3	-71.7943	1158.24	0
4.98834e+06	1326.9	4065.8	29.3	-71.8332	1159.21	0
4.98834e+06	1326.9	4068.1	29.3	-71.8738	1160.3	0
4.98834e+06	1326.9	4070.5	29.3	-71.9162	1161.27	0
4.98835e+06	1327	4072.8	29.4	-71.9569	1162.24	0
4.98835e+06	1327	4075.3	29.4	-72.001	1163.21	0
4.98835e+06	1327	4077.8	29.4	-72.0452	1164.3	0
4.98835e+06	1327.1	4080.4	29.5	-72.0911	1165.27	0
4.98836e+06	1327.1	4082.9	29.5	-72.1353	1166.24	0
4.98836e+06	1327.1	4085.6	29.5	-72.183	1167.21	0
4.98836e+06	1327.1	4088.3	29.5	-72.2307	1168.3	0
4.98836e+06	1327.1	4091.1	29.5	-72.2802	1169.27	0
4.98837e+06	1327.2	4094	29.6	-72.3314	1170.24	0
4.98837e+06	1327.2	4096.8	29.6	-72.3809	1171.21	0
4.98837e+06	1327.3	4099.8	29.7	-72.4339	1172.3	0
4.98838e+06	1327.3	4102.8	29.7	-72.4869	1173.27	0
4.98838e+06	1327.4	4105.9	29.8	-72.5417	1174.24	0
4.98838e+06	1327.4	4109.2	29.8	-72.6	1175.21	0
4.98838e+06	1327.5	4112.4	29.9	-72.6565	1176.3	0
4.98839e+06	1327.5	4115.6	29.9	-72.713	1177.27	0
4.98839e+06	1327.6	4119	30	-72.7731	1178.24	0
4.98839e+06	1327.6	4122.5	30	-72.8349	1179.21	0
4.9884e+06	1327.7	4126	30.1	-72.8968	1180.3	0
4.9884e+06	1327.7	4129.8	30.1	-72.9639	1181.27	0
4988406	1327.8	4133.7	30.2	-73.0328	1182.24	0
4.98841e+06	1327.8	4137.6	30.2	-73.1017	1183.21	0
4988414	1327.9	4141.7	30.3	-73.1741	1184.3	0
4.98842e+06	1327.9	4146	30.3	-73.2501	1185.27	0
4.98842e+06	1328	4150.5	30.4	-73.3296	1186.24	0
4.98843e+06	1328	4155	30.4	-73.4091	1187.21	0
4.98843e+06	1328.1	4159.6	30.5	-73.4904	1188.3	0
4.98844e+06	1328.2	4164.5	30.6	-73.577	1189.27	0
4.98844e+06	1328.2	4169.5	30.6	-73.6653	1190.24	0
4.98845e+06	1328.3	4174.6	30.7	-73.7554	1191.22	0
4988452	1328.4	4179.7	30.8	-73.8455	1192.31	0
4.98846e+06	1328.4	4185	30.8	-73.9392	1193.28	0
4.98846e+06	1328.5	4190.5	30.9	-74.0363	1194.25	0
4.98847e+06	1328.5	4196.1	30.9	-74.1353	1195.22	0
4988474	1328.5	4201.7	30.9	-74.2342	1196.31	0
4.98848e+06	1328.6	4207.5	31	-74.3367	1197.28	0
4.98849e+06	1328.7	4213.2	31.1	-74.4374	1198.25	0
4.98849e+06	1328.7	4219.1	31.1	-74.5416	1199.22	0
4.9885e+06	1328.8	4225.1	31.2	-74.6476	1200.31	0
4.9885e+06	1328.9	4231.2	31.3	-74.7554	1201.29	0
4.98851e+06	1329	4237.3	31.4	-74.8632	1202.26	0
4.98852e+06	1329.1	4243.6	31.5	-74.9745	1203.24	0
4.98852e+06	1329.2	4249.8	31.6	-75.084	1204.32	0
4.98853e+06	1329.3	4256.1	31.7	-75.1953	1205.29	0
4.98853e+06	1329.4	4262.5	31.8	-75.3084	1206.26	0
4.98854e+06	1329.5	4269	31.9	-75.4232	1207.24	0
4.98855e+06	1329.6	4275.5	32	-75.5381	1208.32	0
4.98855e+06	1329.6	4282.1	32	-75.6547	1209.29	0
4988561	1329.6	4288.7	32	-75.7713	1210.26	0
4.98857e+06	1329.7	4295.3	32.1	-75.8879	1211.24	0
4.98857e+06	1329.8	4302	32.2	-76.0063	1212.32	0
4988581	1329.9	4308.7	32.3	-76.1247	1213.29	0
4.98859e+06	1330	4315.5	32.4	-76.2448	1214.26	0
4.98859e+06	1330.1	4322.3	32.5	-76.3649	1215.24	0
4.9886e+06	1330.3	4329.2	32.7	-76.4868	1216.32	0
4.98861e+06	1330.4	4336	32.8	-76.607	1217.29	0
4.98862e+06	1330.4	4343	32.8	-76.7306	1218.26	0
4.98862e+06	1330.5	4350	32.9	-76.8543	1219.35	0
4.98863e+06	1330.6	4356.8	33	-76.9745	1220.32	0
4.98864e+06	1330.7	4363.8	33.1	-77.0981	1221.28	0
4.98864e+06	1330.8	4371	33.2	-77.2254	1222.25	0
4.98865e+06	1330.9	4377.9	33.3	-77.3473	1223.33	0
4.98866e+06	1331.1	4385	33.5	-77.4727	1224.31	0
4.98866e+06	1331.1	4392.1	33.5	-77.5981	1225.28	0
4.98867e+06	1331.2	4399.3	33.6	-77.7253	1226.36	0
4.98868e+06	1331.3	4406.5	33.7	-77.8525	1227.33	0
4.98869e+06	1331.4	4413.6	33.8	-77.978	1228.29	0
4988693	1331.5	4420.7	33.9	-78.1034	1229.26	0
4.9887e+06	1331.6	4427.9	34	-78.2306	1230.35	0
4.98871e+06	1331.8	4435.1	34.2	-78.3578	1231.32	0
4.98871e+06	1331.9	4442.2	34.3	-78.4833	1232.28	0
4.98872e+06	1332.1	4449	34.5	-78.6034	1233.26	0
4.98873e+06	1332.3	4455.9	34.7	-78.7253	1234.34	0
4.98874e+06	1332.5	4462.9	34.9	-78.849	1235.31	0
4.98874e+06	1332.6	4470.1	35	-78.9762	1236.28	0
4.98875e+06	1332.7	4477.2	35.1	-79.1017	1237.36	0
4.98876e+06	1333	4484.3	35.4	-79.2271	1238.33	0
4.98876e+06	1333	4491.5	35.4	-79.3543	1239.31	0
4.98877e+06	1333.1	4498.6	35.5	-79.4797	1240.27	0
4.98878e+06	1333.3	4505.8	35.7	-79.6069	1241.36	0
4.98879e+06	1333.5	4513	35.9	-79.7341	1242.33	0
4.98879e+06	1333.7	4520.3	36.1	-79.8631	1243.29	0
4.9888e+06	1333.8	4527.4	36.2	-79.9886	1244.27	0
4.98881e+06	1334	4534.6	36.4	-80.1158	1245.35	0
4.98881e+06	1334.3	4542	36.7	-80.2465	1246.32	0
4.98882e+06	1334.5	4549.2	36.9	-80.3737	1247.29	0
4.98883e+06	1334.6	4556.5	37	-80.5027	1248.38	0
4988836	1334.8	4563.7	37.2	-80.6299	1249.35	0
4.98884e+06	1335	4570.9	37.4	-80.7571	1250.31	0
4.98885e+06	1335.2	4578.1	37.6	-80.8843	1251.28	0
4.98886e+06	1335.4	4585.6	37.8	-81.0168	1252.37	0
4.98887e+06	1335.3	4593	37.7	-81.1476	1253.33	0
4.98887e+06	1335.3	4600	37.7	-81.2712	1254.31	0
4.98888e+06	1335.3	4606.9	37.7	-81.3932	1255.28	0
4.98889e+06	1335.5	4613.9	37.9	-81.5168	1256.36	0
4.98889e+06	1336	4621	38.4	-81.6423	1257.33	0
4.9889e+06	1336.8	4629	39.2	-81.7836	1258.3	0
4.98891e+06	1337.1	4636.5	39.5	-81.9161	1259.28	0
4.98892e+06	1336.8	4643.3	39.2	-82.0362	1260.36	0
4.98892e+06	1337.5	4651.2	39.9	-82.1758	1261.33	0
4988931	1337.3	4658.7	39.7	-82.3083	1262.31	0
4.98894e+06	1337.3	4666.1	39.7	-82.4391	1263.28	0
4.98895e+06	1337	4673.3	39.4	-82.5663	1264.36	0
4.98895e+06	1336.8	4680.1	39.2	-82.6864	1265.33	0
4988959	1336.8	4686.7	39.2	-82.803	1266.31	0
4.98897e+06	1337.3	4693.6	39.7	-82.9249	1267.39	0
4.98897e+06	1337.8	4700.9	40.2	-83.0539	1268.37	0
4.98898e+06	1337.8	4708.1	40.2	-83.1811	1269.34	0
4.98899e+06	1337.9	4715.2	40.3	-83.3066	1270.31	0
4.98899e+06	1337.9	4722.2	40.3	-83.4302	1271.39	0
4.989e+06	1338.2	4729.2	40.6	-83.5539	1272.37	0
4.98901e+06	1338.7	4736.5	41.1	-83.6829	1273.34	0
4.98902e+06	1338.7	4744	41.1	-83.8154	1274.31	0
4.98902e+06	1338.5	4751.1	40.9	-83.9408	1275.39	0
4.98903e+06	1338.8	4758.5	41.2	-84.0716	1276.37	0
4.98904e+06	1339	4765.5	41.4	-84.1952	1277.34	0
4.98904e+06	1339.1	4772.2	41.5	-84.3136	1278.31	0
4.98905e+06	1339.3	4779.2	41.7	-84.4373	1279.39	0
4.98906e+06	1339.6	4786.4	42	-84.5645	1280.37	0
4.98907e+06	1339.8	4793.3	42.2	-84.6864	1281.34	0
4.98907e+06	1340	4800.3	42.4	-84.8101	1282.31	0
4.98908e+06	1340.1	4807.1	42.5	-84.9302	1283.39	0
4.98909e+06	1340.1	4814.1	42.5	-85.0539	1284.37	0
4.98909e+06	1340.5	4821.5	42.9	-85.1846	1285.34	0
4.9891e+06	1340.6	4828.3	43	-85.3048	1286.31	0
4.98911e+06	1340.6	4835	43	-85.4231	1287.39	0
4989114	1340.7	4841.7	43.1	-85.5415	1288.37	0
4.98912e+06	1341	4848.4	43.4	-85.6599	1289.34	0
4.98913e+06	1341.4	4855.2	43.8	-85.78	1290.31	0
4.98913e+06	1342	4862.6	44.4	-85.9108	1291.39	0
4.98914e+06	1341.7	4869.2	44.1	-86.0274	1292.37	0
4.98915e+06	1341.7	4875.8	44.1	-86.144	1293.34	0
4.98915e+06	1342	4882.5	44.4	-86.2623	1294.31	0
4.98916e+06	1342.1	4889	44.5	-86.3772	1295.4	0
4989168	1342.3	4895.7	44.7	-86.4956	1296.37	0
4.98917e+06	1342.6	4902.5	45	-86.6157	1297.34	0
4.98918e+06	1342.6	4909	45	-86.7305	1298.31	0
4.98919e+06	1342.9	4914.8	45.3	-86.833	1299.4	0
4.98919e+06	1343.7	4919.5	46.1	-86.9161	1300.37	0
4.9892e+06	1344.8	4924.8	47.2	-87.0097	1301.35	0
4989203	1345.8	4930.7	48.2	-87.1139	1302.32	0
4.98921e+06	1346.1	4936.5	48.5	-87.2164	1303.4	0
4.98921e+06	1346.7	4942.2	49.1	-87.3171	1304.38	0
4989221	1347.7	4948.7	50.1	-87.432	1305.35	0
4989228	1348.7	4955.7	51.1	-87.5556	1306.32	0
4.98924e+06	1349.1	4963	51.5	-87.6846	1307.41	0
4.98924e+06	1348.5	4969.8	50.9	-87.8047	1308.38	0
4989248	1348	4975.7	50.4	-87.909	1309.35	0
4.98925e+06	1348.1	4981.2	50.5	-88.0062	1310.33	0
4.98926e+06	1349	4987.3	51.4	-88.1139	1311.41	0
4.98927e+06	1350	4994.2	52.4	-88.2358	1312.38	0
4.98927e+06	1350	5001.3	52.4	-88.3613	1313.35	0
4.98928e+06	1350.1	5007.8	52.5	-88.4761	1314.44	0
4.98929e+06	1349.8	5014.5	52.2	-88.5945	1315.41	0
4.98929e+06	1349.8	5021.3	52.2	-88.7146	1316.38	0
4989300	1349.7	5027.7	52.1	-88.8277	1317.35	0
4989306	1349.5	5033.7	51.9	-88.9337	1318.44	0
4.98931e+06	1349.3	5039.8	51.7	-89.0415	1319.41	0
4.98932e+06	1349.4	5046	51.8	-89.151	1320.38	0
4.98932e+06	1349.5	5052.1	51.9	-89.2588	1321.35	0
4.98933e+06	1349.7	5058.4	52.1	-89.3701	1322.44	0
4.98934e+06	1349.8	5064.3	52.2	-89.4743	1323.41	0
4.98934e+06	1350.2	5070.3	52.6	-89.5803	1324.38	0
4.98935e+06	1350.3	5076.4	52.7	-89.6881	1325.35	0
4.98935e+06	1350.3	5082.2	52.7	-89.7906	1326.44	0
4.98936e+06	1350.9	5087.9	53.3	-89.8913	1327.41	0
4.98937e+06	1350.9	5094.1	53.3	-90.0008	1328.38	0
4.98937e+06	1351.1	5100.3	53.5	-90.1104	1329.35	0
4.98938e+06	1351.3	5106.3	53.7	-90.2164	1330.44	0
4.98938e+06	1351.4	5112.3	53.8	-90.3224	1331.41	0
4.98939e+06	1351.7	5118.3	54.1	-90.4284	1332.38	0
4.9894e+06	1351.9	5124.5	54.3	-90.5379	1333.35	0
4.9894e+06	1352.3	5130.4	54.7	-90.6422	1334.44	0
4.98941e+06	1352.6	5136.3	55	-90.7464	1335.41	0
4.98941e+06	1352.8	5142.4	55.2	-90.8542	1336.38	0
4.98942e+06	1353	5148.6	55.4	-90.9637	1337.35	0
4.98943e+06	1353	5154.3	55.4	-91.0644	1338.44	0
4.98943e+06	1353	5160.3	55.4	-91.1704	1339.41	0
4.98944e+06	1353	5166	55.4	-91.2711	1340.38	0
4.98944e+06	1353	5171.6	55.4	-91.3701	1341.35	0
4.98945e+06	1353	5177.2	55.4	-91.469	1342.44	0
4.98946e+06	1353.4	5183	55.8	-91.5715	1343.41	0
4.98946e+06	1353.8	5188.9	56.2	-91.6757	1344.38	0
4.98947e+06	1354.2	5194.8	56.6	-91.78	1345.35	0
4.98947e+06	1354.3	5200.6	56.7	-91.8824	1346.44	0
4.98948e+06	1354.4	5205.6	56.8	-91.9708	1347.41	0
4.98948e+06	1354.7	5211.3	57.1	-92.0715	1348.38	0
4.98949e+06	1355	5216.9	57.4	-92.1704	1349.46	0
4.9895e+06	1355.3	5222.8	57.7	-92.2747	1350.44	0
4.9895e+06	1355.4	5228.8	57.8	-92.3807	1351.41	0
4.98951e+06	1355.2	5234.6	57.6	-92.4831	1352.38	0
4.98951e+06	1355.5	5240.2	57.9	-92.5821	1353.46	0
4.98952e+06	1355.8	5245.8	58.2	-92.681	1354.43	0
4.98952e+06	1356.2	5251.1	58.6	-92.7746	1355.4	0
4989529	1356.2	5256.7	58.6	-92.8736	1356.38	0
4.98953e+06	1356.6	5262.3	59	-92.9725	1357.46	0
4.98954e+06	1357.1	5267.8	59.5	-93.0697	1358.43	0
4989546	1357.6	5273.7	60	-93.1739	1359.4	0
4.98955e+06	1357.8	5279.6	60.2	-93.2782	1360.37	0
4.98956e+06	1357.8	5285.1	60.2	-93.3754	1361.45	0
4.98956e+06	1358	5290.6	60.4	-93.4725	1362.42	0
4.98957e+06	1358.3	5296.1	60.7	-93.5697	1363.39	0
4989574	1358.6	5301.7	61	-93.6686	1364.47	0
4.98958e+06	1359	5307.2	61.4	-93.7658	1365.44	0
4989585	1359.3	5312.7	61.7	-93.863	1366.41	0
4.98959e+06	1359.5	5318.1	61.9	-93.9584	1367.38	0
4.9896e+06	1359.8	5323.6	62.2	-94.0556	1368.46	0
4.9896e+06	1360.1	5328.8	62.5	-94.1474	1369.43	0
4.98961e+06	1360.5	5334.5	62.9	-94.2481	1370.4	0
4989612	1360.5	5339.7	62.9	-94.34	1371.38	0
4.98962e+06	1360.7	5345.1	63.1	-94.4354	1372.46	0
4.98962e+06	1361.1	5350.6	63.5	-94.5326	1373.44	0
4.98963e+06	1361.5	5356.3	63.9	-94.6333	1374.41	0
4.98963e+06	1361.6	5361.6	64	-94.7269	1375.38	0
4989639	1361.5	5366.7	63.9	-94.817	1376.46	0
4.98964e+06	1361.5	5371.6	63.9	-94.9036	1377.43	0
4.98965e+06	1361.9	5376.8	64.3	-94.9955	1378.4	0
4.98965e+06	1362.3	5382.1	64.7	-95.0891	1379.49	0
4.98966e+06	1362.4	5387.1	64.8	-95.1775	1380.46	0
4.98966e+06	1362.7	5392.1	65.1	-95.2658	1381.43	0
4.98967e+06	1363.5	5397.4	65.9	-95.3594	1382.4	0
4.98967e+06	1363.9	5402.2	66.3	-95.4442	1383.49	0
4.98968e+06	1364.5	5407.4	66.9	-95.5361	1384.46	0
4989685	1365	5412.7	67.4	-95.6298	1385.43	0
4.98969e+06	1365	5418.1	67.4	-95.7251	1386.4	0
4.9897e+06	1365.2	5422.9	67.6	-95.81	1387.49	0
4.9897e+06	1365.6	5427.5	68	-95.8912	1388.46	0
4.9897e+06	1366	5432.4	68.4	-95.9778	1389.43	0
4.98971e+06	1366.3	5437.4	68.7	-96.0661	1390.4	0
4989715	1366.6	5442.7	69	-96.1598	1391.49	0
4.98972e+06	1366.6	5447.5	69	-96.2446	1392.46	0
4.98972e+06	1367.2	5452	69.6	-96.3241	1393.43	0
4.98973e+06	1367.7	5456.6	70.1	-96.4054	1394.4	0
4.98973e+06	1368.1	5461.5	70.5	-96.4919	1395.49	0
4.98974e+06	1368.4	5466.5	70.8	-96.5803	1396.46	0
4.98974e+06	1368.9	5471.5	71.3	-96.6686	1397.43	0
4.98975e+06	1370.3	5474.3	72.7	-96.7181	1398.4	0
4.98975e+06	1370.8	5477.9	73.2	-96.7817	1399.49	0
4.98975e+06	1372.2	5482.3	74.6	-96.8594	1400.46	0
4.98976e+06	1372.2	5488.6	74.6	-96.9707	1401.44	0
4.98977e+06	1373.9	5494.6	76.3	-97.0767	1402.41	0
4989771	1373.3	5498.7	75.7	-97.1492	1403.49	0
4.98978e+06	1373.8	5503.3	76.2	-97.2304	1404.46	0
4.98978e+06	1375.2	5508.3	77.6	-97.3188	1405.43	0
4.98979e+06	1375.9	5513.6	78.3	-97.4124	1406.4	0
4.98979e+06	1376.7	5519.2	79.1	-97.5113	1407.49	0
4.9898e+06	1376.8	5524.8	79.2	-97.6103	1408.46	0
4989802	1376.5	5529.7	78.9	-97.6969	1409.43	0
4.98981e+06	1376.1	5534.9	78.5	-97.7887	1410.52	0
4.98981e+06	1376.6	5539.6	79	-97.8718	1411.49	0
4.98982e+06	1377.8	5545.1	80.2	-97.969	1412.46	0
4.98982e+06	1378.2	5551.1	80.6	-98.075	1413.43	0
4.98983e+06	1377.7	5555.2	80.1	-98.1474	1414.52	0
4.98983e+06	1377.7	5560.3	80.1	-98.2375	1415.49	0
4.98984e+06	1377.7	5565.8	80.1	-98.3347	1416.46	0
4.98984e+06	1377.1	5570.5	79.5	-98.4177	1417.43	0
4.98985e+06	1376.9	5575.1	79.3	-98.499	1418.52	0
4.98985e+06	1379	5581.1	81.4	-98.605	1419.49	0
4.98986e+06	1379	5585.5	81.4	-98.6827	1420.46	0
4.98986e+06	1378.6	5587.1	81	-98.711	1421.43	0
4.98985e+06	1380.3	5574.3	82.7	-98.4848	1422.52	0
4.98927e+06	1442.1	4999.6	144.5	-88.3312	1423.49	0
4.98821e+06	2033.3	3941.4	735.7	-69.6353	1424.46	0
4987853	2445	3580.7	1147.4	-63.2626	1425.43	0
4987721	2552.4	3448.7	1254.8	-60.9305	1426.52	0
4987631	2612.6	3358.7	1315	-59.3404	1427.49	0
4.98756e+06	2660.5	3289	1362.9	-58.1089	1428.46	0
4.98751e+06	2660.5	3239.8	1362.9	-57.2397	1429.43	0
4.98747e+06	2727.5	3198.3	1429.9	-56.5065	1430.52	0
4987435	2727.5	3162.7	1429.9	-55.8775	1431.49	0
4987407	2755	3134.7	1457.4	-55.3828	1432.46	0
4.98738e+06	2779.1	3110.4	1481.5	-54.9535	1433.43	0
4774600	2801	-209672	1503.4	3704.42	1434.52	0
4.98564e+06	2865.9	1369.1	1568.3	-24.1888	1435.5	0
2.12425e+06	3414.3	-2860019	2116.7	50529.8	1436.47	0
1862194	4602.5	-3122078	3304.9	55159.8	1437.45	0
839050	4603.9	-4145223	3306.3	73236.4	1438.53	0
795892	4602.6	-4188380	3305	73998.9	1439.5	0
797757	4603	-4186515	3305.4	73965.9	1440.47	0
793351	4603.1	-4190921	3305.5	74043.8	1441.44	0
795418	4603.9	-4188854	3306.3	74007.3	1442.52	0
790781	4601.9	-4193491	3304.3	74089.2	1443.49	0
796150	4601.9	-4188122	3304.3	73994.3	1444.46	0
796725	4602.2	-4187547	3304.6	73984.2	1445.54	0
795652	4602.1	-4188620	3304.5	74003.1	1446.51	0
793773	4602.5	-4190499	3304.9	74036.3	1447.48	0
798280	4602.2	-4185992	3304.6	73956.7	1448.45	0
794264	4602.8	-4190008	3305.2	74027.6	1449.53	0
787767	4602.6	-4196505	3305	74142.4	1450.5	0
796678	4602.1	-4187594	3304.5	73985	1451.47	0
795014	4602.7	-4189258	3305.1	74014.4	1452.55	0
800815	4603.2	-4183457	3305.6	73911.9	1453.52	0
803718	4603.9	-4180554	3306.3	73860.6	1454.49	0
796544	4602.9	-4187728	3305.3	73987.4	1455.46	0
802252	4603.2	-4182020	3305.6	73886.5	1456.54	0
794900	4603.4	-4189372	3305.8	74016.4	1457.51	0
802699	4604.2	-4181573	3306.6	73878.6	1458.48	0
803839	4604.2	-4180433	3306.6	73858.5	1459.45	0
796301	4604.1	-4187971	3306.5	73991.7	1460.53	0
802729	4604	-4181543	3306.4	73878.1	1461.5	0
792275	4604.6	-4191997	3307	74062.8	1462.47	0
790893	4604.7	-4193379	3307.1	74087.2	1463.55	0
792014	4604.9	-4192258	3307.3	74067.4	1464.52	0
782515	4605.7	-4201757	3308.1	74235.2	1465.49	0
792965	4601.8	-4191307	3304.2	74050.6	1466.46	0
789497	4603.2	-4194775	3305.6	74111.9	1467.54	0
801094	4603.1	-4183179	3305.5	73907	1468.51	0
800084	4604.1	-4184189	3306.5	73924.8	1469.48	0
795587	4603.3	-4188685	3305.7	74004.3	1470.56	0
796462	4602.5	-4187810	3304.9	73988.8	1471.53	0
801432	4603.9	-4182840	3306.3	73901	1472.5	0
799955	4603.9	-4184317	3306.3	73927.1	1473.47	0
793198	4603.5	-4191074	3305.9	74046.5	1474.55	0
799112	4602.9	-4185160	3305.3	73942	1475.52	0
797431	4603.1	-4186841	3305.5	73971.7	1476.49	0
804444	4603.9	-4179828	3306.3	73847.8	1477.57	0
794702	4603.8	-4189570	3306.2	74019.9	1478.54	0
798279	4603.8	-4185993	3306.2	73956.7	1479.51	0
799856	4603.9	-4184416	3306.3	73928.9	1480.48	0
795063	4602.9	-4189209	3305.3	74013.5	1481.56	0
795531	4602.8	-4188741	3305.2	74005.3	1482.53	0
797323	4603.7	-4186949	3306.1	73973.6	1483.5	0
802562	4603.5	-4181710	3305.9	73881	1484.47	0
803985	4604.3	-4180288	3306.7	73855.9	1485.55	0
801632	4605.9	-4182640	3308.3	73897.5	1486.52	0
796895	4604.5	-4187377	3306.9	73981.2	1487.49	0
789044	4605.3	-4195228	3307.7	74119.9	1488.57	0
805343	4605.3	-4178930	3307.7	73831.9	1489.54	0
803860	4603.6	-4180412	3306	73858.1	1490.51	0
801344	4603.3	-4182928	3305.7	73902.6	1491.48	0
808530	4603.3	-4175742	3305.7	73775.6	1492.56	0
800523	4603.7	-4183750	3306.1	73917.1	1493.53	0
800563	4602.6	-4183709	3305	73916.4	1494.5	0
804547	4601.9	-4179725	3304.3	73846	1495.58	0
800077	4602.5	-4184195	3304.9	73924.9	1496.55	0
799452	4602.6	-4184820	3305	73936	1497.52	0
803578	4602.9	-4180694	3305.3	73863.1	1498.49	0
799064	4602.8	-4185208	3305.2	73942.8	1499.58	0
801152	4603	-4183120	3305.4	73905.9	1500.54	0
799584	4602.7	-4184688	3305.1	73933.6	1501.52	0
797452	4602.3	-4186821	3304.7	73971.3	1502.49	0
802501	4601.8	-4181771	3304.2	73882.1	1503.57	0
805311	4601.8	-4178961	3304.2	73832.5	1504.54	0
805851	4602.5	-4178421	3304.9	73822.9	1505.51	0
793673	4603.8	-4190599	3306.2	74038.1	1506.6	0
793775	4604.1	-4190497	3306.5	74036.3	1507.57	0
808995	4604.4	-4175277	3306.8	73767.4	1508.54	0
807142	4603.4	-4177130	3305.8	73800.1	1509.51	0
808851	4604.1	-4175421	3306.5	73769.9	1510.59	0
809952	4604.1	-4174320	3306.5	73750.5	1511.56	0
811562	4604	-4172710	3306.4	73722	1512.53	0
810131	4603.2	-4174141	3305.6	73747.3	1513.5	0
806445	4603.4	-4177827	3305.8	73812.4	1514.58	0
810029	4603.7	-4174243	3306.1	73749.1	1515.55	0
800878	4604	-4183394	3306.4	73910.8	1516.52	0
790870	4604.3	-4193402	3306.7	74087.6	1517.6	0
799894	4604.3	-4184378	3306.7	73928.2	1518.57	0
807307	4604	-4176965	3306.4	73797.2	1519.54	0
818609	4603.2	-4165663	3305.6	73597.5	1520.51	0
824775	4603.4	-4159497	3305.8	73488.6	1521.59	0
812315	4604.1	-4171957	3306.5	73708.7	1522.56	0
802859	4602.5	-4181413	3304.9	73875.8	1523.53	0
817890	4602.5	-4166382	3304.9	73610.2	1524.5	0
806905	4602.7	-4177367	3305.1	73804.3	1525.58	0
809687	4603.3	-4174585	3305.7	73755.2	1526.55	0
805891	4602.4	-4178381	3304.8	73822.2	1527.52	0
812242	4602.4	-4172030	3304.8	73710	1528.6	0
806938	4602.5	-4177334	3304.9	73803.7	1529.57	0
804523	4602.9	-4179749	3305.3	73846.4	1530.54	0
808886	4603.4	-4175386	3305.8	73769.3	1531.51	0
806468	4603	-4177804	3305.4	73812	1532.6	0
811586	4603	-4172686	3305.4	73721.6	1533.56	0
804449	4603.7	-4179823	3306.1	73847.7	1534.53	0
809969	4602.8	-4174303	3305.2	73750.2	1535.62	0
801151	4603.3	-4183121	3305.7	73906	1536.58	0
811867	4602.5	-4172405	3304.9	73716.6	1537.55	0
812383	4603.9	-4171889	3306.3	73707.5	1538.52	0
814330	4603.7	-4169942	3306.1	73673.1	1539.61	0
815254	4604.4	-4169018	3306.8	73656.8	1540.57	0
813841	4604.8	-4170431	3307.2	73681.8	1541.54	0
811903	4604.1	-4172369	3306.5	73716	1542.62	0
817843	4604.1	-4166429	3306.5	73611.1	1543.59	0
808952	4604.2	-4175320	3306.6	73768.1	1544.56	0
806111	4602.7	-4178161	3305.1	73818.3	1545.53	0
809233	4603.3	-4175039	3305.7	73763.2	1546.61	0
820506	4603.3	-4163766	3305.7	73564	1547.58	0
802863	4603.8	-4181410	3306.2	73875.7	1548.55	0
807910	4605.2	-4176362	3307.6	73786.6	1549.52	0
807745	4606.5	-4176527	3308.9	73789.5	1550.61	0
807910	4606.5	-4176362	3308.9	73786.6	1551.57	0
813712	4605	-4170560	3307.4	73684.1	1552.54	0
808926	4605.3	-4175346	3307.7	73768.6	1553.62	0
807845	4603.8	-4176427	3306.2	73787.7	1554.6	0
803713	4603.1	-4180559	3305.5	73860.7	1555.57	0
805309	4602	-4178963	3304.4	73832.5	1556.53	0
805726	4602.1	-4178546	3304.5	73825.1	1557.61	0
815004	4603.3	-4169268	3305.7	73661.2	1558.58	0
818399	4603.2	-4165873	3305.6	73601.2	1559.55	0
811041	4603.9	-4173231	3306.3	73731.2	1560.64	0
803308	4603	-4180964	3305.4	73867.9	1561.61	0
817353	4603	-4166919	3305.4	73619.7	1562.58	0
812294	4603.1	-4171978	3305.5	73709.1	1563.55	0
806739	4602.6	-4177533	3305	73807.2	1564.63	0
809622	4602.1	-4174651	3304.5	73756.3	1565.6	0
814510	4603	-4169762	3305.4	73669.9	1566.57	0
813408	4602.9	-4170864	3305.3	73689.4	1567.54	0
812885	4603.2	-4171387	3305.6	73698.7	1568.62	0
810769	4602.3	-4173503	3304.7	73736	1569.59	0
813353	4603.1	-4170919	3305.5	73690.4	1570.56	0
815837	4602.8	-4168435	3305.2	73646.5	1571.65	0
815941	4603.1	-4168331	3305.5	73644.7	1572.61	0
809740	4602.7	-4174532	3305.1	73754.2	1573.59	0
815490	4603.1	-4168782	3305.5	73652.6	1574.55	0
815964	4602.8	-4168308	3305.2	73644.3	1575.64	0
835438	4602.6	-4148834	3305	73300.2	1576.61	0
816945	4602.6	-4167327	3305	73626.9	1577.57	0
821099	4604.8	-4163173	3307.2	73553.5	1578.65	0
808186	4603.6	-4176086	3306	73781.7	1579.62	0
813302	4602.5	-4170970	3304.9	73691.3	1580.59	0
809269	4602.5	-4175003	3304.9	73762.5	1581.56	0
816201	4602.8	-4168071	3305.2	73640.1	1582.64	0
797684	4604.4	-4186588	3306.8	73967.2	1583.61	0
800128	4605.2	-4184144	3307.6	73924	1584.58	0
811881	4605.3	-4172391	3307.7	73716.4	1585.56	0
812370	4602.5	-4171902	3304.9	73707.8	1586.64	0
818510	4602.4	-4165762	3304.8	73599.3	1587.61	0
808918	4601.2	-4175354	3303.6	73768.7	1588.58	0
807184	4601.5	-4177088	3303.9	73799.4	1589.67	0
813336	4601.6	-4170936	3304	73690.7	1590.63	0
812409	4601.6	-4171863	3304	73707.1	1591.61	0
808871	4601.5	-4175401	3303.9	73769.6	1592.58	0
814178	4601.2	-4170094	3303.6	73675.8	1593.66	0
809073	4601.5	-4175199	3303.9	73766	1594.62	0
808132	4601.2	-4176141	3303.6	73782.6	1595.6	0
811226	4601.3	-4173046	3303.7	73728	1596.57	0
813483	4601.3	-4170790	3303.7	73688.1	1597.65	0
808346	4602.1	-4175926	3304.5	73778.9	1598.62	0
814957	4601.8	-4169315	3304.2	73662.1	1599.58	0
812211	4601.7	-4172062	3304.1	73710.6	1600.67	0
811466	4603	-4172806	3305.4	73723.7	1601.64	0
813955	4601.9	-4170318	3304.3	73679.8	1602.61	0
812952	4603.1	-4171320	3305.5	73697.5	1603.58	0
810485	4602.2	-4173787	3304.6	73741.1	1604.67	0
815604	4602.2	-4168668	3304.6	73650.6	1605.64	0
814093	4602.2	-4170179	3304.6	73677.3	1606.61	0
812390	4602.4	-4171882	3304.8	73707.4	1607.57	0
805669	4602.6	-4178603	3305	73826.1	1608.65	0
807568	4602.4	-4176705	3304.8	73792.6	1609.62	0
805724	4601.9	-4178548	3304.3	73825.2	1610.59	0
809279	4602.3	-4174993	3304.7	73762.4	1611.68	0
809348	4602.1	-4174924	3304.5	73761.1	1612.65	0
815280	4602	-4168992	3304.4	73656.3	1613.62	0
820705	4602	-4163567	3304.4	73560.5	1614.58	0
818993	4602.5	-4165280	3304.9	73590.8	1615.67	0
818239	4601.6	-4166033	3304	73604.1	1616.64	0
813008	4601.9	-4171264	3304.3	73696.5	1617.61	0
817929	4602.1	-4166343	3304.5	73609.5	1618.69	0
816968	4602.4	-4167304	3304.8	73626.5	1619.66	0
809641	4602.4	-4174631	3304.8	73756	1620.62	0
813391	4601.4	-4170881	3303.8	73689.7	1621.6	0
816242	4601.9	-4168030	3304.3	73639.4	1622.68	0
818101	4602.8	-4166171	3305.2	73606.5	1623.65	0
810821	4601.7	-4173452	3304.1	73735.1	1624.62	0
817231	4601.7	-4167041	3304.1	73621.9	1625.59	0
814997	4602	-4169275	3304.4	73661.3	1626.68	0
819870	4602	-4164402	3304.4	73575.2	1627.65	0
813385	4601.4	-4170887	3303.8	73689.8	1628.61	0
814580	4601.6	-4169692	3304	73668.7	1629.7	0
812414	4602.2	-4171858	3304.6	73707	1630.67	0
815083	4601.2	-4169190	3303.6	73659.8	1631.64	0
816407	4602	-4167865	3304.4	73636.4	1632.6	0
810483	4601.4	-4173789	3303.8	73741.1	1633.69	0
820327	4602.4	-4163945	3304.8	73567.2	1634.65	0
815819	4602.4	-4168453	3304.8	73646.8	1635.62	0
812384	4602	-4171888	3304.4	73707.5	1636.59	0
816311	4601.3	-4167961	3303.7	73638.1	1637.68	0
811198	4602.2	-4173074	3304.6	73728.5	1638.65	0
810394	4601.3	-4173878	3303.7	73742.7	1639.62	0
810694	4601.4	-4173578	3303.8	73737.4	1640.7	0
815632	4601.4	-4168640	3303.8	73650.1	1641.67	0
810898	4601.8	-4173375	3304.2	73733.8	1642.64	0
817179	4602	-4167093	3304.4	73622.8	1643.61	0
813305	4601.6	-4170967	3304	73691.2	1644.7	0
813763	4601.7	-4170509	3304.1	73683.1	1645.67	0
815532	4602.2	-4168740	3304.6	73651.9	1646.63	0
818464	4601.6	-4165808	3304	73600.1	1647.61	0
811407	4601.5	-4172865	3303.9	73724.8	1648.7	0
820210	4602.3	-4164062	3304.7	73569.2	1649.67	0
818203	4602.3	-4166069	3304.7	73604.7	1650.64	0
815578	4602.1	-4168694	3304.5	73651.1	1651.61	0
818100	4602	-4166172	3304.4	73606.5	1652.69	0
813646	4602.2	-4170627	3304.6	73685.2	1653.66	0
814871	4601.5	-4169401	3303.9	73663.6	1654.63	0
818164	4601.8	-4166108	3304.2	73605.4	1655.71	0
814946	4602.5	-4169326	3304.9	73662.2	1656.68	0
809089	4601.4	-4175183	3303.8	73765.7	1657.65	0
816810	4601.1	-4167462	3303.5	73629.3	1658.62	0
816822	4602.5	-4167450	3304.9	73629.1	1659.7	0
811878	4601.6	-4172394	3304	73716.4	1660.67	0
811837	4601.8	-4172435	3304.2	73717.2	1661.64	0
816266	4601.4	-4168006	3303.8	73638.9	1662.72	0
817176	4602.1	-4167096	3304.5	73622.8	1663.69	0
818468	4602.1	-4165804	3304.5	73600	1664.66	0
814355	4602.1	-4169917	3304.5	73672.7	1665.63	0
811794	4601.6	-4172478	3304	73717.9	1666.71	0
818091	4601.3	-4166181	3303.7	73606.7	1667.68	0
814905	4601.6	-4169367	3304	73663	1668.65	0
819814	4601.5	-4164458	3303.9	73576.2	1669.73	0
817956	4602.6	-4166316	3305	73609.1	1670.7	0
813831	4601.7	-4170441	3304.1	73681.9	1671.67	0
808623	4601.5	-4175649	3303.9	73773.9	1672.63	0
811897	4601.2	-4172375	3303.6	73716.1	1673.72	0
812426	4601.6	-4171846	3304	73706.8	1674.69	0
809968	4601.3	-4174304	3303.7	73750.2	1675.66	0
816125	4601.6	-4168147	3304	73641.4	1676.63	0
811224	4601.2	-4173048	3303.6	73728	1677.71	0
814989	4601.4	-4169283	3303.8	73661.5	1678.68	0
814706	4601.4	-4169566	3303.8	73666.5	1679.65	0
819954	4601.6	-4164318	3304	73573.8	1680.73	0
811386	4602	-4172886	3304.4	73725.1	1681.7	0
812355	4600.7	-4171917	3303.1	73708	1682.67	0
805805	4601.5	-4178467	3303.9	73823.7	1683.64	0
812172	4600.6	-4172100	3303	73711.3	1684.72	0
814082	4601.9	-4170190	3304.3	73677.5	1685.69	0
815478	4601.4	-4168795	3303.8	73652.9	1686.66	0
816984	4601.6	-4167288	3304	73626.2	1687.74	0
817037	4601.6	-4167235	3304	73625.3	1688.71	0
812313	4601.6	-4171959	3304	73708.8	1689.68	0
813334	4601.4	-4170938	3303.8	73690.7	1690.65	0
812383	4601.2	-4171889	3303.6	73707.5	1691.73	0
814184	4601.4	-4170088	3303.8	73675.7	1692.7	0
822575	4601.4	-4161697	3303.8	73527.5	1693.67	0
812747	4601.2	-4171526	3303.6	73701.1	1694.75	0
813559	4601.2	-4170713	3303.6	73686.8	1695.72	0
814660	4601.4	-4169612	3303.8	73667.3	1696.69	0
818209	4601.2	-4166064	3303.6	73604.6	1697.66	0
820156	4601.9	-4164116	3304.3	73570.2	1698.74	0
814126	4602	-4170146	3304.4	73676.7	1699.71	0
819265	4601.6	-4165008	3304	73585.9	1700.68	0
817259	4602	-4167013	3304.4	73621.4	1701.65	0
818469	4601.5	-4165803	3303.9	73600	1702.73	0
814935	4601.7	-4169337	3304.1	73662.4	1703.7	0
819800	4601.7	-4164472	3304.1	73576.5	1704.67	0
816598	4601.4	-4167674	3303.8	73633.1	1705.75	0
817099	4601.7	-4167173	3304.1	73624.2	1706.72	0
815541	4601.5	-4168731	3303.9	73651.7	1707.69	0
811489	4601.5	-4172783	3303.9	73723.3	1708.66	0
811661	4600.9	-4172611	3303.3	73720.3	1709.74	0
819532	4600.9	-4164740	3303.3	73581.2	1710.71	0
814568	4601.9	-4169704	3304.3	73668.9	1711.68	0
815154	4601.5	-4169119	3303.9	73658.6	1712.76	0
818655	4601.3	-4165617	3303.7	73596.7	1713.73	0
819751	4602.1	-4164521	3304.5	73577.4	1714.7	0
819462	4601.4	-4164810	3303.8	73582.5	1715.67	0
818701	4601.8	-4165571	3304.2	73595.9	1716.75	0
819677	4602.1	-4164595	3304.5	73578.6	1717.72	0
820248	4601.3	-4164024	3303.7	73568.6	1718.69	0
810344	4601.3	-4173928	3303.7	73743.6	1719.77	0
815713	4601.4	-4168559	3303.8	73648.7	1720.74	0
811464	4601	-4172808	3303.4	73723.8	1721.71	0
812478	4600.8	-4171794	3303.2	73705.9	1722.68	0
812625	4601	-4171647	3303.4	73703.2	1723.76	0
812569	4601	-4171704	3303.4	73704.2	1724.73	0
816691	4600.8	-4167581	3303.2	73631.4	1725.7	0
815625	4601.8	-4168647	3304.2	73650.2	1726.67	0
821621	4601.8	-4162651	3304.2	73544.3	1727.75	0
817957	4602.2	-4166316	3304.6	73609.1	1728.72	0
811586	4601.1	-4172686	3303.5	73721.6	1729.69	0
813489	4600.9	-4170783	3303.3	73688	1730.77	0
815425	4601.5	-4168847	3303.9	73653.8	1731.74	0
806823	4600.6	-4177449	3303	73805.8	1732.71	0
815249	4600.6	-4169023	3303	73656.9	1733.68	0
818914	4601.5	-4165358	3303.9	73592.1	1734.76	0
811330	4600.6	-4172943	3303	73726.1	1735.73	0
812704	4600.8	-4171569	3303.2	73701.9	1736.7	0
811219	4601	-4173053	3303.4	73728.1	1737.78	0
814249	4601	-4170023	3303.4	73674.6	1738.75	0
800453	4601.5	-4183819	3303.9	73918.3	1739.72	0
805258	4601.2	-4179014	3303.6	73833.4	1740.69	0
813313	4601.6	-4170960	3304	73691.1	1741.77	0
812065	4601.1	-4172207	3303.5	73713.1	1742.74	0
806194	4601.9	-4178078	3304.3	73816.9	1743.71	0
809712	4603.8	-4174560	3306.2	73754.7	1744.79	0
810562	4603.5	-4173710	3305.9	73739.7	1745.76	0
808895	4601.6	-4175377	3304	73769.1	1746.73	0
812843	4600.7	-4171429	3303.1	73699.4	1747.7	0
810212	4601.4	-4174060	3303.8	73745.9	1748.78	0
816146	4601.3	-4168126	3303.7	73641	1749.75	0
812728	4602	-4171544	3304.4	73701.4	1750.72	0
812856	4602.7	-4171416	3305.1	73699.2	1751.69	0
815946	4603	-4168326	3305.4	73644.6	1752.77	0
811090	4603	-4173182	3305.4	73730.4	1753.74	0
816856	4601.8	-4167416	3304.2	73628.5	1754.71	0
811018	4600.1	-4173254	3302.5	73731.6	1755.79	0
814171	4602.4	-4170101	3304.8	73675.9	1756.76	0
810030	4601.9	-4174242	3304.3	73749.1	1757.73	0
810157	4600.9	-4174115	3303.3	73746.9	1758.7	0
816432	4601.5	-4167840	3303.9	73636	1759.78	0
808784	4601.2	-4175488	3303.6	73771.1	1760.75	0
821101	4602	-4163171	3304.4	73553.5	1761.72	0
815530	4601.8	-4168742	3304.2	73651.9	1762.81	0
814186	4602.4	-4170086	3304.8	73675.7	1763.78	0
816220	4602.1	-4168052	3304.5	73639.7	1764.75	0
814658	4601.8	-4169614	3304.2	73667.3	1765.72	0
811472	4601.5	-4172800	3303.9	73723.6	1766.81	0
815214	4601.5	-4169058	3303.9	73657.5	1767.78	0
812939	4602	-4171333	3304.4	73697.7	1768.74	0
809876	4601.5	-4174396	3303.9	73751.8	1769.71	0
812725	4601.4	-4171548	3303.8	73701.5	1770.8	0
815498	4601.7	-4168774	3304.1	73652.5	1771.77	0
813233	4600.6	-4171039	3303	73692.5	1772.74	0
815657	4602	-4168615	3304.4	73649.7	1773.71	0
814427	4600.9	-4169845	3303.3	73671.4	1774.79	0
813138	4601.5	-4171134	3303.9	73694.2	1775.76	0
814365	4600.7	-4169907	3303.1	73672.5	1776.73	0
814459	4601.1	-4169813	3303.5	73670.9	1777.81	0
807234	4599.9	-4177038	3302.3	73798.5	1778.78	0
815656	4601.1	-4168616	3303.5	73649.7	1779.75	0
811040	4600.9	-4173232	3303.3	73731.3	1780.72	0
810986	4600.6	-4173286	3303	73732.2	1781.8	0
816995	4600.6	-4167278	3303	73626.1	1782.77	0
814332	4601.1	-4169940	3303.5	73673.1	1783.74	0
816055	4601.1	-4168218	3303.5	73642.7	1784.82	0
812814	4601	-4171458	3303.4	73699.9	1785.79	0
815424	4600.7	-4168848	3303.1	73653.8	1786.76	0
811949	4600.9	-4172323	3303.3	73715.2	1787.73	0
816098	4601.1	-4168174	3303.5	73641.9	1788.81	0
812210	4600.6	-4172062	3303	73710.6	1789.78	0
813762	4600.6	-4170510	3303	73683.2	1790.75	0
821070	4601.4	-4163202	3303.8	73554	1791.72	0
808763	4601	-4175509	3303.4	73771.5	1792.81	0
818375	4601.3	-4165897	3303.7	73601.7	1793.78	0
804732	4601.4	-4179540	3303.8	73842.7	1794.74	0
815478	4604	-4168794	3306.4	73652.8	1795.83	0
818729	4604	-4165543	3306.4	73595.4	1796.79	0
814543	4604	-4169729	3306.4	73669.4	1797.76	0
822814	4602.8	-4161458	3305.2	73523.2	1798.73	0
811971	4603.6	-4172301	3306	73714.8	1799.81	0
817400	4602.4	-4166872	3304.8	73618.9	1800.78	0
814871	4602	-4169402	3304.4	73663.6	1801.76	0
816258	4600.7	-4168014	3303.1	73639.1	1802.73	0
817024	4601.4	-4167248	3303.8	73625.5	1803.81	0
817491	4601.1	-4166782	3303.5	73617.3	1804.78	0
816014	4601.1	-4168258	3303.5	73643.4	1805.75	0
808431	4600	-4175841	3302.4	73777.4	1806.83	0
811144	4600.3	-4173128	3302.7	73729.4	1807.8	0
816560	4601	-4167712	3303.4	73633.7	1808.77	0
815497	4601.3	-4168775	3303.7	73652.5	1809.74	0
814248	4600.7	-4170024	3303.1	73674.6	1810.82	0
813958	4600.7	-4170314	3303.1	73679.7	1811.79	0
815824	4600.8	-4168448	3303.2	73646.7	1812.76	0
813416	4601	-4170856	3303.4	73689.3	1813.85	0
819246	4600.9	-4165026	3303.3	73586.3	1814.82	0
814039	4600.8	-4170233	3303.2	73678.3	1815.79	0
823281	4601.2	-4160991	3303.6	73515	1816.76	0
809865	4600.7	-4174408	3303.1	73752	1817.85	0
810078	4599.9	-4174194	3302.3	73748.2	1818.81	0
813404	4600.1	-4170868	3302.5	73689.5	1819.78	0
815727	4600.8	-4168545	3303.2	73648.4	1820.75	0
818422	4601.5	-4165851	3303.9	73600.8	1821.83	0
818357	4600.5	-4165915	3302.9	73602	1822.8	0
813806	4600.6	-4170466	3303	73682.4	1823.77	0
812558	4600.3	-4171714	3302.7	73704.4	1824.85	0
817068	4601.1	-4167204	3303.5	73624.8	1825.82	0
816471	4601.1	-4167801	3303.5	73635.3	1826.79	0
817488	4600.9	-4166784	3303.3	73617.3	1827.76	0
823061	4601.3	-4161211	3303.7	73518.9	1828.85	0
821625	4601.3	-4162647	3303.7	73544.2	1829.82	0
814118	4601.1	-4170154	3303.5	73676.9	1830.79	0
815844	4600	-4168429	3302.4	73646.4	1831.75	0
813891	4600.4	-4170381	3302.8	73680.9	1832.83	0
816153	4600.6	-4168119	3303	73640.9	1833.8	0
821807	4600.7	-4162465	3303.1	73541	1834.77	0
816300	4600.9	-4167972	3303.3	73638.3	1835.86	0
817555	4600.6	-4166717	3303	73616.1	1836.82	0
812997	4600.4	-4171275	3302.8	73696.7	1837.79	0
815564	4600.7	-4168708	3303.1	73651.3	1838.77	0
817508	4600.7	-4166764	3303.1	73617	1839.85	0
817576	4600.7	-4166696	3303.1	73615.8	1840.82	0
814048	4600.5	-4170224	3302.9	73678.1	1841.79	0
819214	4600.4	-4165058	3302.8	73586.8	1842.76	0
815337	4601.1	-4168935	3303.5	73655.3	1843.85	0
814809	4600.3	-4169463	3302.7	73664.7	1844.82	0
816592	4600.9	-4167680	3303.3	73633.2	1845.78	0
815377	4600.7	-4168895	3303.1	73654.6	1846.86	0
811127	4599.7	-4173145	3302.1	73729.7	1847.83	0
812033	4600.2	-4172239	3302.6	73713.7	1848.8	0
813940	4600.2	-4170332	3302.6	73680	1849.77	0
809623	4599.7	-4174649	3302.1	73756.3	1850.86	0
820691	4601.1	-4163582	3303.5	73560.8	1851.83	0
816126	4600.1	-4168147	3302.5	73641.4	1852.79	0
812135	4600.2	-4172137	3302.6	73711.9	1853.88	0
815705	4600.1	-4168567	3302.5	73648.8	1854.85	0
811904	4600.1	-4172368	3302.5	73716	1855.81	0
815810	4600.1	-4168462	3302.5	73647	1856.78	0
816023	4600.2	-4168249	3302.6	73643.2	1857.87	0
820426	4600.6	-4163846	3303	73565.4	1858.83	0
817190	4600.6	-4167082	3303	73622.6	1859.8	0
815695	4600.6	-4168577	3303	73649	1860.89	0
814702	4600.4	-4169570	3302.8	73666.6	1861.86	0
816501	4599.9	-4167772	3302.3	73634.8	1862.82	0
814270	4600	-4170002	3302.4	73674.2	1863.79	0
809773	4600	-4174500	3302.4	73753.6	1864.88	0
818705	4600.1	-4165567	3302.5	73595.8	1865.85	0
819022	4600.5	-4165250	3302.9	73590.2	1866.81	0
813596	4600.1	-4170676	3302.5	73686.1	1867.78	0
819968	4600.8	-4164304	3303.2	73573.5	1868.86	0
810161	4599.6	-4174111	3302	73746.8	1869.83	0
809824	4599.6	-4174448	3302	73752.7	1870.8	0
809761	4599.5	-4174511	3301.9	73753.9	1871.89	0
817415	4599.8	-4166857	3302.2	73618.6	1872.85	0
818450	4600.4	-4165822	3302.8	73600.3	1873.82	0
814232	4600	-4170040	3302.4	73674.9	1874.79	0
813879	4600.6	-4170393	3303	73681.1	1875.88	0
824126	4600.3	-4160146	3302.7	73500.1	1876.85	0
816627	4600.6	-4167645	3303	73632.5	1877.82	0
817663	4600.8	-4166609	3303.2	73614.2	1878.9	0
818087	4600.4	-4166185	3302.8	73606.8	1879.86	0
821011	4601.1	-4163261	3303.5	73555.1	1880.83	0
817736	4599.8	-4166537	3302.2	73613	1881.8	0
818792	4600.7	-4165480	3303.1	73594.3	1882.89	0
814349	4600.1	-4169923	3302.5	73672.8	1883.86	0
819747	4600.1	-4164525	3302.5	73577.4	1884.83	0
816820	4601.7	-4167452	3304.1	73629.1	1885.8	0
813540	4601.4	-4170732	3303.8	73687.1	1886.88	0
811053	4601.8	-4173219	3304.2	73731	1887.86	0
812735	4600.1	-4171538	3302.5	73701.3	1888.82	0
813916	4600.1	-4170356	3302.5	73680.4	1889.91	0
814308	4600.8	-4169964	3303.2	73673.5	1890.88	0
812720	4600.9	-4171552	3303.3	73701.6	1891.85	0
817770	4601	-4166502	3303.4	73612.4	1892.81	0
812008	4601.1	-4172264	3303.5	73714.1	1893.9	0
819472	4600.7	-4164800	3303.1	73582.3	1894.87	0
822600	4600.5	-4161672	3302.9	73527	1895.83	0
812852	4600.1	-4171420	3302.5	73699.2	1896.81	0
813648	4600.1	-4170624	3302.5	73685.2	1897.89	0
816510	4600.3	-4167762	3302.7	73634.6	1898.86	0
820456	4600.3	-4163816	3302.7	73564.9	1899.83	0
817076	4600.8	-4167196	3303.2	73624.6	1900.92	0
823731	4600.5	-4160541	3302.9	73507	1901.89	0
815355	4600.5	-4168917	3302.9	73655	1902.85	0
817017	4600.2	-4167255	3302.6	73625.6	1903.82	0
815057	4600.4	-4169215	3302.8	73660.3	1904.9	0
820091	4599.6	-4164181	3302	73571.3	1905.88	0
819565	4600.3	-4164707	3302.7	73580.6	1906.85	0
817263	4600.6	-4167009	3303	73621.3	1907.82	0
815555	4600.3	-4168717	3302.7	73651.5	1908.9	0
813901	4600.1	-4170371	3302.5	73680.7	1909.87	0
814747	4599.6	-4169525	3302	73665.8	1910.84	0
818403	4600.2	-4165869	3302.6	73601.2	1911.92	0
814665	4599.8	-4169607	3302.2	73667.2	1912.89	0
810773	4599.8	-4173499	3302.2	73736	1913.86	0
816698	4599.3	-4167574	3301.7	73631.3	1914.83	0
822613	4600.3	-4161659	3302.7	73526.8	1915.91	0
816006	4600.8	-4168266	3303.2	73643.5	1916.88	0
817075	4599.9	-4167197	3302.3	73624.6	1917.84	0
815731	4599.7	-4168541	3302.1	73648.4	1918.93	0
810808	4599.6	-4173464	3302	73735.4	1919.9	0
817068	4599.9	-4167204	3302.3	73624.8	1920.87	0
820933	4599.6	-4163339	3302	73556.5	1921.84	0
812564	4599.8	-4171708	3302.2	73704.3	1922.93	0
817436	4600	-4166836	3302.4	73618.2	1923.9	0
820054	4600.2	-4164218	3302.6	73572	1924.86	0
814840	4599.7	-4169432	3302.1	73664.1	1925.84	0
819408	4600.3	-4164864	3302.7	73583.4	1926.92	0
814789	4599.9	-4169483	3302.3	73665	1927.89	0
817856	4599.9	-4166416	3302.3	73610.8	1928.86	0
815443	4600	-4168829	3302.4	73653.5	1929.83	0
820020	4599.7	-4164252	3302.1	73572.6	1930.92	0
819556	4600.2	-4164716	3302.6	73580.8	1931.88	0
813335	4599.7	-4170937	3302.1	73690.7	1932.86	0
811965	4599.8	-4172308	3302.2	73714.9	1933.94	0
817791	4599.7	-4166481	3302.1	73612	1934.91	0
814687	4600.1	-4169585	3302.5	73666.8	1935.88	0
812668	4599.2	-4171604	3301.6	73702.5	1936.85	0
809608	4598.6	-4174665	3301	73756.6	1937.93	0
811896	4599.1	-4172376	3301.5	73716.1	1938.9	0
815854	4599.9	-4168419	3302.3	73646.2	1939.87	0
815228	4599.3	-4169044	3301.7	73657.3	1940.85	0
816139	4599.9	-4168134	3302.3	73641.2	1941.93	0
820954	4600	-4163319	3302.4	73556.1	1942.9	0
816883	4600	-4167389	3302.4	73628	1943.87	0
821178	4599.6	-4163094	3302	73552.1	1944.84	0
817182	4600.4	-4167090	3302.8	73622.7	1945.93	0
815408	4599.1	-4168864	3301.5	73654.1	1946.9	0
828222	4600.2	-4156050	3302.6	73427.7	1947.87	0
818675	4600.4	-4165597	3302.8	73596.4	1948.95	0
813985	4599.4	-4170287	3301.8	73679.2	1949.92	0
814028	4599.6	-4170244	3302	73678.5	1950.89	0
815594	4599.5	-4168678	3301.9	73650.8	1951.86	0
818963	4599.4	-4165309	3301.8	73591.3	1952.94	0
818006	4600	-4166266	3302.4	73608.2	1953.91	0
817414	4599.8	-4166858	3302.2	73618.6	1954.88	0
811994	4599.3	-4172278	3301.7	73714.4	1955.96	0
817016	4599.7	-4167256	3302.1	73625.7	1956.93	0
814989	4599.7	-4169283	3302.1	73661.5	1957.9	0
815748	4599.4	-4168524	3301.8	73648.1	1958.87	0
816233	4599.7	-4168039	3302.1	73639.5	1959.95	0
822060	4599.5	-4162212	3301.9	73536.6	1960.92	0
819286	4600	-4164987	3302.4	73585.6	1961.89	0
820255	4599.8	-4164017	3302.2	73568.4	1962.97	0
821561	4599.5	-4162711	3301.9	73545.4	1963.94	0
813876	4599.9	-4170396	3302.3	73681.1	1964.91	0
815560	4599.5	-4168712	3301.9	73651.4	1965.88	0
810028	4599.9	-4174245	3302.3	73749.1	1966.96	0
817122	4600.2	-4167150	3302.6	73623.8	1967.93	0
811281	4599.8	-4172991	3302.2	73727	1968.9	0
812171	4603.7	-4172102	3306.1	73711.3	1969.87	0
805190	4601.8	-4179082	3304.2	73834.6	1970.95	0
801687	4601.3	-4182585	3303.7	73896.5	1971.92	0
808809	4601.3	-4175464	3303.7	73770.7	1972.89	0
817768	4600.6	-4166505	3303	73612.4	1973.97	0
820424	4600.4	-4163848	3302.8	73565.5	1974.95	0
816300	4599.8	-4167972	3302.2	73638.3	1975.91	0
812824	4600.7	-4171448	3303.1	73699.7	1976.88	0
811576	4599.6	-4172696	3302	73721.8	1977.97	0
813651	4599.5	-4170621	3301.9	73685.1	1978.94	0
818363	4599.5	-4165909	3301.9	73601.9	1979.91	0
816827	4599.5	-4167445	3301.9	73629	1980.88	0
819242	4599.3	-4165030	3301.7	73586.3	1981.96	0
819601	4599.9	-4164671	3302.3	73580	1982.93	0
816615	4599.6	-4167657	3302	73632.8	1983.9	0
817519	4599.5	-4166753	3301.9	73616.8	1984.98	0
816760	4599.2	-4167512	3301.6	73630.2	1985.95	0
816048	4599.4	-4168224	3301.8	73642.8	1986.92	0
812743	4599.4	-4171529	3301.8	73701.2	1987.89	0
817561	4599.3	-4166712	3301.7	73616.1	1988.97	0
816702	4599.6	-4167570	3302	73631.2	1989.94	0
818389	4599.2	-4165883	3301.6	73601.4	1990.91	0
814391	4599.5	-4169881	3301.9	73672.1	1991.99	0
814091	4599.2	-4170181	3301.6	73677.4	1992.96	0
823053	4599.1	-4161220	3301.5	73519	1993.93	0
817441	4599.9	-4166831	3302.3	73618.2	1994.9	0
818415	4599.3	-4165857	3301.7	73600.9	1995.98	0
825175	4600.2	-4159097	3302.6	73481.5	1996.95	0
818979	4600.2	-4165293	3302.6	73591	1997.92	0
817035	4599.3	-4167237	3301.7	73625.3	1998.9	0
815107	4599.4	-4169165	3301.8	73659.4	1999.98	0
817151	4599.2	-4167121	3301.6	73623.3	2000.95	0
819889	4599.2	-4164383	3301.6	73574.9	2001.93	0
818753	4599.9	-4165519	3302.3	73595	2002.9	0
817402	4599.4	-4166870	3301.8	73618.9	2003.98	0
821942	4599.7	-4162330	3302.1	73538.6	2004.95	0
816880	4599.2	-4167393	3301.6	73628.1	2005.92	0
821735	4599.6	-4162537	3302	73542.3	2007	0
822120	4600	-4162152	3302.4	73535.5	2007.97	0
820182	4599.8	-4164090	3302.2	73569.7	2008.94	0
810698	4599	-4173574	3301.4	73737.3	2009.91	0
815896	4598.8	-4168377	3301.2	73645.5	2010.99	0
817422	4599.1	-4166850	3301.5	73618.5	2011.96	0
816365	4599.7	-4167907	3302.1	73637.2	2012.93	0
819528	4599.5	-4164744	3301.9	73581.3	2014.01	0
816040	4599.3	-4168232	3301.7	73642.9	2014.98	0
822235	4599.7	-4162037	3302.1	73533.5	2015.95	0
809287	4599.7	-4174985	3302.1	73762.2	2016.92	0
819606	4598.6	-4164666	3301	73579.9	2018	0
819511	4599.5	-4164761	3301.9	73581.6	2018.97	0
818266	4599.4	-4166006	3301.8	73603.6	2019.94	0
819116	4599.3	-4165157	3301.7	73588.6	2020.91	0
826613	4599.6	-4157659	3302	73456.1	2021.99	0
817771	4600.1	-4166501	3302.5	73612.3	2022.96	0
818852	4600	-4165420	3302.4	73593.2	2023.93	0
816621	4598.9	-4167651	3301.3	73632.6	2025.01	0
814545	4598.9	-4169727	3301.3	73669.3	2025.98	0
823153	4600.2	-4161119	3302.6	73517.2	2026.95	0
817080	4599.3	-4167192	3301.7	73624.5	2027.92	0
818218	4599.3	-4166054	3301.7	73604.4	2029.01	0
813988	4599.3	-4170284	3301.7	73679.2	2029.98	0
821592	4599.7	-4162681	3302.1	73544.8	2030.95	0
820572	4599.7	-4163700	3302.1	73562.9	2031.92	0
820089	4599.7	-4164183	3302.1	73571.4	2033	0
821992	4599.2	-4162280	3301.6	73537.8	2033.97	0
818344	4599.7	-4165928	3302.1	73602.2	2034.94	0
819371	4599.3	-4164901	3301.7	73584.1	2036.02	0
815872	4598.9	-4168400	3301.3	73645.9	2036.99	0
821032	4599.5	-4163240	3301.9	73554.7	2037.96	0
820473	4599.5	-4163799	3301.9	73564.6	2038.93	0
819281	4599.2	-4164991	3301.6	73585.6	2040.01	0
814749	4599.3	-4169523	3301.7	73665.7	2040.98	0
822368	4599.3	-4161904	3301.7	73531.1	2041.95	0
816713	4598.9	-4167560	3301.3	73631	2042.92	0
821708	4599.6	-4162564	3302	73542.8	2044.01	0
817124	4599.1	-4167148	3301.5	73623.8	2044.98	0
815897	4599.1	-4168376	3301.5	73645.4	2045.95	0
819904	4598.9	-4164368	3301.3	73574.6	2047.03	0
[truncated: 1,842 more rows]

## Sheet: Bulk mode_2
SRS QCM200 Data File
Data Taken on 1/29/2021 at 11:39:17 AM
Tag Definitions
Zero Rel F = 1
Zero Rel R = 2
Zero Rel F and R = 3
User Tag = 4
Begining of File = 5
The Sauerbrey model was used to calculate the relative mass change.
Notes:
Raw F (Hz)	Raw R (Ohms)	Delta F (Hz)	Delta R (Ohms)	Delta Mass (ug/cm2)	Time (s)	Tag
4.98507e+06	1116.9	0	0	0	0.049	5
4.98507e+06	1117.5	0.9	0.6	-0.0159009	9.362	0
4.98507e+06	1114.7	1.4	-2.2	-0.0247347	10.119	0
4.98508e+06	1112.7	1.7	-4.2	-0.030035	11.101	0
4.98508e+06	1112.7	1.9	-4.2	-0.0335686	12.082	0
4.98508e+06	1111.1	2	-5.8	-0.0353353	13.066	0
4.98508e+06	1110.1	2.4	-6.8	-0.0424024	14.044	0
4.98508e+06	1108.2	2.7	-8.7	-0.0477027	15.139	0
4.98508e+06	1106.5	3	-10.4	-0.053003	16.122	0
4.98508e+06	1105.1	3.2	-11.8	-0.0565365	17.1	0
4.98508e+06	1104.9	3.2	-12	-0.0565365	18.081	0
4.98508e+06	1104.7	3.4	-12.2	-0.06007	19.059	0
4.98508e+06	1104.5	3.4	-12.4	-0.06007	20.039	0
4.98508e+06	1104.5	3.5	-12.4	-0.0618368	21.131	0
4.98508e+06	1105	3.5	-11.9	-0.0618368	22.1	0
4985077	1105.4	3.6	-11.5	-0.0636036	23.078	0
4985077	1105.8	3.6	-11.1	-0.0636036	24.049	0
4985077	1106.7	3.6	-10.2	-0.0636036	25.142	0
4.98508e+06	1107.9	3.5	-9	-0.0618368	26.112	0
4.98508e+06	1107.9	3.4	-9	-0.06007	27.091	0
4.98508e+06	1109	3.4	-7.9	-0.06007	28.06	0
4.98508e+06	1110.1	3.4	-6.8	-0.06007	29.152	0
4.98508e+06	1110.7	3.5	-6.2	-0.0618368	30.123	0
4.98508e+06	1110.9	3.5	-6	-0.0618368	31.1	0
4.98508e+06	1111.5	3.5	-5.4	-0.0618368	32.07	0
4.98508e+06	1112.5	3.4	-4.4	-0.06007	33.051	0
4.98508e+06	1113.7	3.4	-3.2	-0.06007	34.137	0
4.98508e+06	1114.8	3.4	-2.1	-0.06007	35.111	0
4.98508e+06	1115.6	3.4	-1.3	-0.06007	36.082	0
4.98508e+06	1115.7	3.4	-1.2	-0.06007	37.059	0
4.98508e+06	1117.5	3.3	0.6	-0.0583033	38.143	0
4.98508e+06	1118.1	3.3	1.2	-0.0583033	39.121	0
4.98508e+06	1118	3.4	1.1	-0.06007	40.093	0
4.98508e+06	1118	3.7	1.1	-0.0653703	41.07	0
4.98508e+06	1116.8	4.2	-0.1	-0.0742042	42.157	0
4.98508e+06	1113.5	4.5	-3.4	-0.0795045	43.131	0
4.98508e+06	1111.3	4.7	-5.6	-0.083038	44.109	0
4.98508e+06	1110.2	4.9	-6.7	-0.0865715	45.08	0
4.98508e+06	1110.1	4.9	-6.8	-0.0865715	46.058	0
4.98508e+06	1110.2	5	-6.7	-0.0883383	47.142	0
4.98508e+06	1109.2	5.1	-7.7	-0.0901051	48.112	0
4.98508e+06	1109.1	5.3	-7.8	-0.0936386	49.09	0
4.98508e+06	1108.1	5.5	-8.8	-0.0971721	50.062	0
4.98508e+06	1108	5.5	-8.9	-0.0971721	51.153	0
4.98508e+06	1107.9	5.7	-9	-0.100706	52.124	0
4.98508e+06	1106.6	6	-10.3	-0.106006	53.098	0
4.98508e+06	1105.1	6.2	-11.8	-0.109539	54.07	0
4.98508e+06	1104.5	6.5	-12.4	-0.11484	55.154	0
4985080	1104.1	6.6	-12.8	-0.116607	56.133	0
4.98508e+06	1104.1	6.8	-12.8	-0.12014	57.104	0
4.98508e+06	1103.7	6.9	-13.2	-0.121907	58.077	0
4.98508e+06	1103.3	7	-13.6	-0.123674	59.164	0
4.98508e+06	1103.1	7	-13.8	-0.123674	60.137	0
4.98508e+06	1103.4	7.1	-13.5	-0.12544	61.112	0
4.98508e+06	1103.8	7.2	-13.1	-0.127207	62.083	0
4.98508e+06	1104.1	7.1	-12.8	-0.12544	63.171	0
4.98508e+06	1104.9	7	-12	-0.123674	64.142	0
4.98508e+06	1106	6.9	-10.9	-0.121907	65.112	0
4.98508e+06	1106.6	7	-10.3	-0.123674	66.091	0
4.98508e+06	1107.2	6.9	-9.7	-0.121907	67.175	0
4.98508e+06	1107.9	6.9	-9	-0.121907	68.146	0
4.98508e+06	1108.3	7	-8.6	-0.123674	69.116	0
4.98508e+06	1109.2	7	-7.7	-0.123674	70.089	0
4.98508e+06	1110.5	6.8	-6.4	-0.12014	71.183	0
4.98508e+06	1110.5	6.9	-6.4	-0.121907	72.153	0
4.98508e+06	1110	7	-6.9	-0.123674	73.124	0
4.98508e+06	1109.8	7	-7.1	-0.123674	74.097	0
4.98508e+06	1109.6	7.1	-7.3	-0.12544	75.183	0
4.98508e+06	1109.9	7.2	-7	-0.127207	76.161	0
4.98508e+06	1110.1	7.3	-6.8	-0.128974	77.132	0
4.98508e+06	1109.8	7.4	-7.1	-0.130741	78.101	0
4985081	1108.9	7.6	-8	-0.134274	79.185	0
4.98508e+06	1108.2	7.7	-8.7	-0.136041	80.153	0
4.98508e+06	1107.6	7.8	-9.3	-0.137808	81.137	0
4.98508e+06	1107.7	7.9	-9.2	-0.139574	82.109	0
4.98508e+06	1107.7	7.9	-9.2	-0.139574	83.194	0
4.98508e+06	1108	7.9	-8.9	-0.139574	84.165	0
4.98508e+06	1108.7	7.9	-8.2	-0.139574	85.138	0
4.98508e+06	1108.7	7.8	-8.2	-0.137808	86.115	0
4985081	1109.9	7.6	-7	-0.134274	87.203	0
4.98508e+06	1111.3	7.5	-5.6	-0.132508	88.174	0
4.98508e+06	1112.6	7.5	-4.3	-0.132508	89.143	0
4.98508e+06	1113.4	7.5	-3.5	-0.132508	90.111	0
4985081	1113.2	7.6	-3.7	-0.134274	91.206	0
4.98508e+06	1113.8	7.5	-3.1	-0.132508	92.179	0
4.98508e+06	1116.1	7.2	-0.8	-0.127207	93.151	0
4.98508e+06	1117.6	7.2	0.7	-0.127207	94.123	0
4.98508e+06	1117.1	7.4	0.2	-0.130741	95.211	0
4.98508e+06	1116.2	7.5	-0.7	-0.132508	96.191	0
4.98508e+06	1115.2	7.7	-1.7	-0.136041	97.163	0
4.98508e+06	1114.2	8	-2.7	-0.141341	98.134	0
4.98508e+06	1113.3	8.2	-3.6	-0.144875	99.105	0
4.98508e+06	1112.4	8.5	-4.5	-0.150175	100.192	0
4985082	1112.4	8.6	-4.5	-0.151942	101.17	0
4.98508e+06	1112.1	8.7	-4.8	-0.153709	102.141	0
4.98508e+06	1112	8.7	-4.9	-0.153709	103.112	0
4.98508e+06	1112	8.8	-4.9	-0.155475	104.196	0
4.98508e+06	1112.5	8.7	-4.4	-0.153709	105.169	0
4.98508e+06	1113.2	8.7	-3.7	-0.153709	106.142	0
4.98508e+06	1113.8	8.7	-3.1	-0.153709	107.116	0
4.98508e+06	1114.4	8.7	-2.5	-0.153709	108.204	0
4.98508e+06	1114.9	8.7	-2	-0.153709	109.175	0
4.98508e+06	1114.7	8.9	-2.2	-0.157242	110.149	0
4.98508e+06	1114.1	8.9	-2.8	-0.157242	111.127	0
4.98508e+06	1114.7	9	-2.2	-0.159009	112.215	0
4.98508e+06	1114.8	9	-2.1	-0.159009	113.184	0
4.98508e+06	1114.3	9	-2.6	-0.159009	114.154	0
4.98508e+06	1114.3	9.1	-2.6	-0.160776	115.127	0
4.98508e+06	1114.3	9.1	-2.6	-0.160776	116.215	0
4.98508e+06	1114.7	9.2	-2.2	-0.162543	117.184	0
4.98508e+06	1114.7	9.2	-2.2	-0.162543	118.154	0
4.98508e+06	1114.3	9.4	-2.6	-0.166076	119.127	0
4.98508e+06	1113.8	9.5	-3.1	-0.167843	120.215	0
4985083	1113.6	9.6	-3.3	-0.169609	121.193	0
4.98508e+06	1113.4	9.7	-3.5	-0.171376	122.164	0
4.98508e+06	1112.9	9.7	-4	-0.171376	123.138	0
4.98508e+06	1112	10	-4.9	-0.176677	124.224	0
4.98508e+06	1110	10.4	-6.9	-0.183744	125.194	0
4985084	1108.1	10.6	-8.8	-0.187277	126.164	0
4.98508e+06	1107.3	10.8	-9.6	-0.190811	127.137	0
4.98508e+06	1107.6	10.8	-9.3	-0.190811	128.224	0
4.98508e+06	1108.4	10.8	-8.5	-0.190811	129.194	0
4985084	1108.4	10.6	-8.5	-0.187277	130.165	0
4.98508e+06	1109.3	10.7	-7.6	-0.189044	131.142	0
4.98508e+06	1109.3	10.8	-7.6	-0.190811	132.226	0
4.98508e+06	1108.8	10.9	-8.1	-0.192578	133.196	0
4.98508e+06	1108.9	10.9	-8	-0.192578	134.169	0
4.98508e+06	1109.2	10.9	-7.7	-0.192578	135.142	0
4.98508e+06	1109.7	10.9	-7.2	-0.192578	136.226	0
4.98508e+06	1110.6	10.9	-6.3	-0.192578	137.195	0
4.98508e+06	1111.8	10.7	-5.1	-0.189044	138.166	0
4985084	1113.4	10.6	-3.5	-0.187277	139.139	0
4985084	1114.5	10.6	-2.4	-0.187277	140.224	0
4985084	1114.3	10.6	-2.6	-0.187277	141.203	0
4.98508e+06	1115.6	10.5	-1.3	-0.18551	142.175	0
4.98508e+06	1117.9	10.2	1	-0.18021	143.148	0
4.98508e+06	1120.9	9.9	4	-0.17491	144.234	0
4.98508e+06	1120.9	9.7	4	-0.171376	145.205	0
4985083	1123	9.6	6.1	-0.169609	146.179	0
4.98508e+06	1124.1	9.5	7.2	-0.167843	147.152	0
4.98508e+06	1125.7	9.4	8.8	-0.166076	148.236	0
4.98508e+06	1127.4	9.2	10.5	-0.162543	149.208	0
4.98508e+06	1129.1	9.1	12.2	-0.160776	150.182	0
4.98508e+06	1131.7	8.9	14.8	-0.157242	151.161	0
4985082	1134.3	8.6	17.4	-0.151942	152.248	0
4.98508e+06	1137.2	8.4	20.3	-0.148408	153.222	0
4.98508e+06	1139.9	8.2	23	-0.144875	154.193	0
4.9851e+06	1142.1	27.8	25.2	-0.491161	155.164	0
4.9851e+06	1176.3	30.9	59.4	-0.545931	156.257	0
4.98508e+06	1134.2	9.4	17.3	-0.166076	157.229	0
4.98508e+06	1136.3	9.2	19.4	-0.162543	158.199	0
4.98508e+06	1136.3	8.7	19.4	-0.153709	159.172	0
4.98508e+06	1141.5	8.5	24.6	-0.150175	160.258	0
4.98508e+06	1145.4	8	28.5	-0.141341	161.235	0
4.98508e+06	1151	7.7	34.1	-0.136041	162.207	0
4.98508e+06	1156.3	7.1	39.4	-0.12544	163.18	0
4.98508e+06	1164.5	6.5	47.6	-0.11484	164.266	0
4.98508e+06	1173.6	6.3	56.7	-0.111306	165.235	0
4.98508e+06	1176.6	6.2	59.7	-0.109539	166.205	0
4.98508e+06	1180.1	5.9	63.2	-0.104239	167.176	0
4.98508e+06	1185.6	5.5	68.7	-0.0971721	168.263	0
4.98508e+06	1195	5.1	78.1	-0.0901051	169.235	0
4.98508e+06	1202.1	4.7	85.2	-0.083038	170.207	0
4985078	1206.9	4.6	90	-0.0812712	171.184	0
4.98508e+06	1210.8	4.5	93.9	-0.0795045	172.268	0
4.98508e+06	1219	4.2	102.1	-0.0742042	173.236	0
4.98508e+06	1219	3.8	102.1	-0.0671371	174.207	0
4.98508e+06	1227.5	3.5	110.6	-0.0618368	175.18	0
4.98508e+06	1239.5	3.1	122.6	-0.0547697	176.267	0
4.98508e+06	1253	2.9	136.1	-0.0512362	177.236	0
4.98508e+06	1268.2	2.7	151.3	-0.0477027	178.208	0
4.98508e+06	1281.2	2.7	164.3	-0.0477027	179.182	0
4.98508e+06	1270.9	2.8	154	-0.0494694	180.268	0
4.98508e+06	1264.3	2.9	147.4	-0.0512362	181.247	0
4.98508e+06	1255.4	3.2	138.5	-0.0565365	182.218	0
4.98508e+06	1258.8	3	141.9	-0.053003	183.191	0
4985077	1252.6	3.6	135.7	-0.0636036	184.276	0
4.98508e+06	1217.5	5.3	100.6	-0.0936386	185.247	0
4.98508e+06	1184	6.7	67.1	-0.118373	186.218	0
4.98508e+06	1173.3	7.4	56.4	-0.130741	187.191	0
4985081	1169.7	7.6	52.8	-0.134274	188.276	0
4985081	1169.7	7.6	52.8	-0.134274	189.247	0
4.98508e+06	1171.5	7.5	54.6	-0.132508	190.218	0
4.98508e+06	1172.5	9.4	55.6	-0.166076	191.191	0
4.98509e+06	1193.7	13.7	76.8	-0.242047	192.276	0
4985080	1179.6	6.6	62.7	-0.116607	193.247	0
4.98508e+06	1187.7	6.3	70.8	-0.111306	194.217	0
4.98508e+06	1204.2	6.5	87.3	-0.11484	195.193	0
4.98508e+06	1222.6	4.7	105.7	-0.083038	196.278	0
4.98508e+06	1234.7	4.7	117.8	-0.083038	197.249	0
4.98508e+06	1247.1	4.4	130.2	-0.0777377	198.222	0
4.98508e+06	1251.3	4.3	134.4	-0.0759709	199.195	0
4.98508e+06	1259.3	4.2	142.4	-0.0742042	200.282	0
4.98508e+06	1274.9	4.3	158	-0.0759709	201.259	0
4.98508e+06	1250.6	4.7	133.7	-0.083038	202.229	0
4.98508e+06	1250.6	5.4	133.7	-0.0954054	203.199	0
4985079	1226.9	5.6	110	-0.0989389	204.287	0
4.98508e+06	1224.8	5.7	107.9	-0.100706	205.259	0
4.98508e+06	1221	5.5	104.1	-0.0971721	206.23	0
4985089	1225.4	15.6	108.5	-0.275616	207.202	0
4.98137e+06	1204.9	-3701.5	88	65.3969	208.289	0
4.98528e+06	1578.4	208.4	461.5	-3.68194	209.263	0
4.98591e+06	2029.1	839.3	912.2	-14.8285	210.236	0
4.98585e+06	2201.2	773.2	1084.3	-13.6606	211.214	0
4.98524e+06	2000.9	168.7	884	-2.98053	212.299	0
4.98521e+06	1816.4	134.2	699.5	-2.371	213.271	0
4.98539e+06	1983.8	312	866.9	-5.51231	214.241	0
4.9857e+06	2176.7	631.3	1059.8	-11.1536	215.214	0
4.98597e+06	2189.9	897.5	1073	-15.8567	216.3	0
4985970	2189.9	896.6	1073	-15.8408	217.274	0
4.98597e+06	2189.9	900.2	1073	-15.9044	218.246	0
4.98598e+06	2188.7	908.5	1071.8	-16.0511	219.217	0
4.98598e+06	2186.4	903.9	1069.5	-15.9698	220.301	0
4.98598e+06	2187.4	906.8	1070.5	-16.021	221.277	0
4.98599e+06	2186.3	913.7	1069.4	-16.1429	222.248	0
4.98599e+06	2184.2	916.9	1067.3	-16.1995	223.221	0
4.98599e+06	2182.7	918.2	1065.8	-16.2224	224.307	0
4.98599e+06	2184.6	914.4	1067.7	-16.1553	225.277	0
4.986e+06	2183.5	921.7	1066.6	-16.2843	226.248	0
4.986e+06	2180.2	928.4	1063.3	-16.4027	227.221	0
4.98601e+06	2179.5	931.9	1062.6	-16.4645	228.307	0
4.98601e+06	2175.9	941.1	1059	-16.627	229.277	0
4.98602e+06	2174.8	943	1057.9	-16.6606	230.248	0
4.98602e+06	2174.8	943.8	1057.9	-16.6747	231.223	0
4.98602e+06	2173.2	947.9	1056.3	-16.7472	232.307	0
4986028	2173.2	954.6	1056.3	-16.8655	233.277	0
4.98603e+06	2170.9	959.5	1054	-16.9521	234.248	0
4.98604e+06	2168.9	966.4	1052	-17.074	235.333	0
4986040	2166.5	966.6	1049.6	-17.0776	236.306	0
4.98604e+06	2167.1	967.2	1050.2	-17.0882	237.278	0
4.98604e+06	2168.2	966.2	1051.3	-17.0705	238.249	0
4.98605e+06	2166.7	973.2	1049.8	-17.1942	239.337	0
4.98606e+06	2163.7	982.3	1046.8	-17.3549	240.308	0
4.98606e+06	2162.5	982.7	1045.6	-17.362	241.286	0
4.98606e+06	2162.2	984.7	1045.3	-17.3973	242.257	0
4.98606e+06	2161.5	986.9	1044.6	-17.4362	243.341	0
4.98606e+06	2164.5	981.9	1047.6	-17.3479	244.31	0
4.98606e+06	2165.6	987.3	1048.7	-17.4433	245.278	0
4986085	2161.1	1011.6	1044.2	-17.8726	246.249	0
4986119	2155.6	1045.6	1038.7	-18.4733	247.337	0
4986168	2155.6	1094.6	1038.7	-19.339	248.308	0
4.98621e+06	2150.8	1132.5	1033.9	-20.0086	249.278	0
4.98622e+06	2152.5	1148.4	1035.6	-20.2895	250.249	0
4.98622e+06	2153.9	1143.3	1037	-20.1994	251.337	0
4.98621e+06	2151.7	1140.2	1034.8	-20.1447	252.308	0
4.98621e+06	2149.8	1135.7	1032.9	-20.0652	253.278	0
4.98622e+06	2150.5	1146.4	1033.6	-20.2542	254.249	0
4.98622e+06	2146.9	1150.4	1030	-20.3249	255.337	0
4.98622e+06	2149.9	1141.7	1033	-20.1712	256.308	0
4.98622e+06	2149	1142.4	1032.1	-20.1835	257.278	0
4.98622e+06	2149.8	1141.9	1032.9	-20.1747	258.249	0
4.98622e+06	2149.8	1144.7	1032.9	-20.2242	259.337	0
4.98618e+06	2161	1108.4	1044.1	-19.5828	260.308	0
4.98624e+06	2143	1167.4	1026.1	-20.6252	261.285	0
4.98625e+06	2143	1177	1026.1	-20.7948	262.258	0
4.98625e+06	2140.1	1179.2	1023.2	-20.8337	263.342	0
4.98626e+06	2139.5	1188	1022.6	-20.9892	264.313	0
4.98627e+06	2137.2	1197.2	1020.3	-21.1517	265.285	0
4.98628e+06	2133.3	1205.2	1016.4	-21.2931	266.258	0
4.98628e+06	2132	1207.9	1015.1	-21.3408	267.342	0
4.98629e+06	2130.6	1214.7	1013.7	-21.4609	268.313	0
4.98629e+06	2130.8	1218.9	1013.9	-21.5351	269.286	0
4.98631e+06	2125.7	1232.1	1008.8	-21.7683	270.259	0
4986321	2120.7	1247.6	1003.8	-22.0422	271.343	0
4.98633e+06	2113.6	1257.7	996.7	-22.2206	272.316	0
4.98633e+06	2113.1	1261.5	996.2	-22.2877	273.289	0
4986336	2114.3	1262.6	997.4	-22.3072	274.262	0
4986331	2118.7	1257.6	1001.8	-22.2188	275.348	0
4.98633e+06	2120.5	1258.4	1003.6	-22.233	276.318	0
4.98633e+06	2120.5	1260.2	1003.6	-22.2648	277.289	0
4.98633e+06	2121.1	1258.1	1004.2	-22.2277	278.266	0
4986329	2125.3	1255.6	1008.4	-22.1835	279.35	0
4.98634e+06	2126.4	1264.3	1009.5	-22.3372	280.32	0
4.98634e+06	2125	1264	1008.1	-22.3319	281.299	0
4.98634e+06	2126.6	1265.1	1009.7	-22.3514	282.269	0
4986339	2128.5	1265.6	1011.6	-22.3602	283.354	0
4986340	2129.8	1266.6	1012.9	-22.3779	284.327	0
4.98634e+06	2130.3	1271.2	1013.4	-22.4591	285.3	0
4.98635e+06	2129.3	1275.8	1012.4	-22.5404	286.274	0
4.98635e+06	2129.9	1279.9	1013	-22.6128	287.359	0
4.98637e+06	2123.5	1294.7	1006.6	-22.8743	288.331	0
4.98636e+06	2128.1	1288.3	1011.2	-22.7613	289.304	0
4986375	2128.1	1301.6	1011.2	-22.9962	290.276	0
4.98638e+06	2122.2	1307.7	1005.3	-23.104	291.36	0
4.9864e+06	2122.2	1323.5	1005.3	-23.3832	292.331	0
4.98641e+06	2114.8	1334.5	997.9	-23.5775	293.304	0
4.98642e+06	2110.6	1349.7	993.7	-23.846	294.278	0
4.98644e+06	2102.7	1364.2	985.8	-24.1022	295.362	0
4.98644e+06	2096.7	1366.9	979.8	-24.1499	296.333	0
4.98644e+06	2097.8	1369.7	980.9	-24.1994	297.306	0
4.98644e+06	2101.6	1367.3	984.7	-24.157	298.282	0
4.98645e+06	2102.7	1374.2	985.8	-24.2789	299.371	0
4.98645e+06	2101.2	1377.5	984.3	-24.3372	300.342	0
4.98645e+06	2102.7	1381.2	985.8	-24.4026	301.318	0
4.98646e+06	2100.7	1387.2	983.8	-24.5086	302.289	0
4.98646e+06	2104.2	1385.7	987.3	-24.4821	303.377	0
4986466	2102.7	1392.6	985.8	-24.604	304.349	0
4.98647e+06	2100.5	1400.4	983.6	-24.7418	305.32	0
4.98648e+06	2100.5	1402.5	983.6	-24.7789	306.294	0
4.98648e+06	2102.1	1402.2	985.2	-24.7736	307.381	0
4.98648e+06	2105.3	1404.9	988.4	-24.8213	308.35	0
4986481	2105.7	1407.6	988.8	-24.869	309.319	0
4.98649e+06	2107.4	1414.5	990.5	-24.9909	310.292	0
4.9865e+06	2103.9	1423.2	987	-25.1446	311.381	0
4986504	2101.9	1430.6	985	-25.2754	312.351	0
4.98651e+06	2100.4	1432.2	983.5	-25.3036	313.32	0
4.98651e+06	2103.6	1436	986.7	-25.3708	314.296	0
4.98652e+06	2099.9	1447.5	983	-25.5739	315.383	0
4.98653e+06	2095.8	1454.9	978.9	-25.7047	316.351	0
4.98654e+06	2093.3	1463.4	976.4	-25.8549	317.32	0
4.98654e+06	2092.8	1468.5	975.9	-25.945	318.403	0
4.98655e+06	2093.1	1472.4	976.2	-26.0139	319.373	0
4.98655e+06	2093.1	1480	976.2	-26.1481	320.343	0
4.98656e+06	2091	1488.1	974.1	-26.2913	321.313	0
4.98657e+06	2087.6	1500.5	970.7	-26.5103	322.396	0
4.98658e+06	2081.3	1508.5	964.4	-26.6517	323.365	0
4.98659e+06	2079.7	1512.9	962.8	-26.7294	324.337	0
4.9866e+06	2079.5	1522.1	962.6	-26.892	325.307	0
4.9866e+06	2074.2	1529.8	957.3	-27.028	326.392	0
4.9866e+06	2076.4	1527	959.5	-26.9785	327.361	0
4.98661e+06	2078.8	1532.9	961.9	-27.0828	328.331	0
4.98661e+06	2080.4	1535.9	963.5	-27.1358	329.416	0
4.98662e+06	2078.4	1542.4	961.5	-27.2506	330.388	0
4.98663e+06	2075.1	1553.2	958.2	-27.4414	331.359	0
4.98664e+06	2070.7	1562.1	953.8	-27.5986	332.331	0
4986640	2069.6	1566.6	952.7	-27.6782	333.416	0
4.98664e+06	2075	1565.7	958.1	-27.6623	334.388	0
4.98664e+06	2075	1571.3	958.1	-27.7612	335.359	0
4.98665e+06	2074.2	1578.4	957.3	-27.8866	336.331	0
4.98666e+06	2071.8	1586.2	954.9	-28.0244	337.416	0
4.98667e+06	2068.7	1595.7	951.8	-28.1923	338.388	0
4.98667e+06	2065.8	1597	948.9	-28.2153	339.359	0
4.98668e+06	2070.2	1602	953.3	-28.3036	340.331	0
4.98668e+06	2065.7	1610.2	948.8	-28.4485	341.419	0
4.98669e+06	2068	1611.9	951.1	-28.4785	342.391	0
4.9867e+06	2064	1623	947.1	-28.6746	343.36	0
4.9867e+06	2063.8	1626.2	946.9	-28.7311	344.33	0
4.9867e+06	2063.9	1630.7	947	-28.8106	345.415	0
4.98671e+06	2063.8	1637	946.9	-28.922	346.383	0
4.98672e+06	2060.5	1645	943.6	-29.0633	347.351	0
4.98672e+06	2065.4	1643.3	948.5	-29.0333	348.322	0
4.98672e+06	2070.6	1642.8	953.7	-29.0244	349.407	0
4.98672e+06	2070.6	1650.5	953.7	-29.1605	350.379	0
4.98672e+06	2068.4	1649.5	951.5	-29.1428	351.35	0
4.98673e+06	2073	1652.1	956.1	-29.1887	352.433	0
4986725	2076.4	1651.6	959.5	-29.1799	353.402	0
4.98673e+06	2079	1656.5	962.1	-29.2665	354.372	0
4.98674e+06	2078.4	1662.7	961.5	-29.376	355.342	0
4.98673e+06	2079.5	1661.4	962.6	-29.353	356.425	0
4.98674e+06	2084.9	1662.4	968	-29.3707	357.393	0
4.98673e+06	2089	1660	972.1	-29.3283	358.362	0
4986736	2093.5	1662.6	976.6	-29.3742	359.336	0
4.98673e+06	2096.1	1660	979.2	-29.3283	360.423	0
4.98674e+06	2094.4	1669.9	977.5	-29.5032	361.393	0
4.98673e+06	2105.5	1659.1	988.6	-29.3124	362.362	0
4.98674e+06	2104	1665	987.1	-29.4167	363.445	0
4.9867e+06	2130.3	1626.5	1013.4	-28.7365	364.415	0
4.98665e+06	2130.3	1578.9	1013.4	-27.8955	365.387	0
4.98663e+06	2154.4	1554.9	1037.5	-27.4715	366.359	0
4.98665e+06	2159.9	1575.8	1043	-27.8407	367.443	0
4.98663e+06	2161.1	1556	1044.2	-27.4909	368.415	0
4.98665e+06	2161.7	1580.7	1044.8	-27.9273	369.387	0
4986664	2160.2	1590.6	1043.3	-28.1022	370.359	0
4.98668e+06	2154.5	1605.5	1037.6	-28.3654	371.443	0
4.98668e+06	2157.7	1607.5	1040.8	-28.4008	372.415	0
4.98669e+06	2152.3	1614.1	1035.4	-28.5174	373.387	0
4986683	2157.3	1609.6	1040.4	-28.4379	374.359	0
4.98667e+06	2162.9	1594.5	1046	-28.1711	375.443	0
4986633	2171.4	1559.6	1054.5	-27.5545	376.415	0
4.98664e+06	2174.2	1566	1057.3	-27.6676	377.387	0
4.98668e+06	2166.8	1601.9	1049.9	-28.3018	378.359	0
4.98668e+06	2166.5	1607.9	1049.6	-28.4078	379.443	0
4986640	2166.5	1566.6	1049.6	-27.6782	380.415	0
4.98669e+06	2172.6	1619.7	1055.7	-28.6163	381.387	0
4986729	2165.8	1655.6	1048.9	-29.2506	382.359	0
4.98677e+06	2150.8	1691.9	1033.9	-29.8919	383.443	0
4.98676e+06	2147.3	1683.5	1030.4	-29.7435	384.415	0
4.98677e+06	2148.5	1692.1	1031.6	-29.8955	385.387	0
4.98679e+06	2145.9	1718.5	1029	-30.3619	386.36	0
4.9868e+06	2136.2	1724	1019.3	-30.4591	387.443	0
4.98677e+06	2147.2	1698.1	1030.3	-30.0015	388.415	0
4.9868e+06	2145.1	1727.2	1028.2	-30.5156	389.387	0
4.98681e+06	2144	1734.4	1027.1	-30.6428	390.36	0
4.98681e+06	2140.9	1734.2	1024	-30.6393	391.443	0
4.9868e+06	2149.5	1727	1032.6	-30.512	392.415	0
4.98681e+06	2149.5	1734.9	1032.6	-30.6516	393.387	0
4.98682e+06	2146.5	1747.3	1029.6	-30.8707	394.472	0
4986842	2146.5	1768.6	1029.6	-31.247	395.443	0
4.98687e+06	2134.3	1799.2	1017.4	-31.7877	396.415	0
4.98689e+06	2121	1816.2	1004.1	-32.088	397.387	0
4.98688e+06	2120.4	1808.1	1003.5	-31.9449	398.472	0
4.98689e+06	2119.4	1820	1002.5	-32.1551	399.443	0
4.9869e+06	2126.4	1821.9	1009.5	-32.1887	400.415	0
4.9869e+06	2124.3	1823.4	1007.4	-32.2152	401.388	0
4.98692e+06	2121.3	1844.5	1004.4	-32.588	402.473	0
4.98692e+06	2114.5	1844.9	997.6	-32.5951	403.444	0
4.98692e+06	2122.6	1844.9	1005.7	-32.5951	404.416	0
4986922	2122.1	1848.6	1005.2	-32.6604	405.39	0
4.98692e+06	2127.2	1843.7	1010.3	-32.5739	406.475	0
4.98692e+06	2127.4	1850.5	1010.5	-32.694	407.445	0
4.9869e+06	2127.4	1829.1	1010.5	-32.3159	408.416	0
4986907	2140.1	1833.6	1023.2	-32.3954	409.389	0
4.98691e+06	2141.6	1833	1024.7	-32.3848	410.474	0
4.98689e+06	2143.2	1814	1026.3	-32.0491	411.444	0
4.98688e+06	2155.5	1806.9	1038.6	-31.9237	412.415	0
4.98684e+06	2160.6	1768.1	1043.7	-31.2382	413.387	0
4.98681e+06	2174.5	1736.4	1057.6	-30.6781	414.474	0
4.9865e+06	2166.8	1421.7	1049.9	-25.1181	415.445	0
4.98637e+06	2094.6	1300.3	977.7	-22.9733	416.419	0
4.98636e+06	2067.6	1285.1	950.7	-22.7047	417.391	0
4.98635e+06	2054.1	1280.8	937.2	-22.6287	418.476	0
4.98632e+06	2031.9	1243	915	-21.9609	419.445	0
4.98632e+06	2025.3	1248.5	908.4	-22.0581	420.419	0
4.98635e+06	2037.5	1272.4	920.6	-22.4803	421.393	0
4.9864e+06	2072.7	1328.5	955.8	-23.4715	422.476	0
4.98651e+06	2072.7	1441.1	955.8	-25.4609	423.445	0
4986583	2131.2	1509.6	1014.3	-26.6711	424.419	0
4.98655e+06	2158.6	1476.7	1041.7	-26.0898	425.391	0
4.98619e+06	2060	1113.4	943.1	-19.6712	426.483	0
4.98614e+06	1816.4	1062.1	699.5	-18.7648	427.454	0
4.98613e+06	1744.1	1052.7	627.2	-18.5987	428.424	0
4.98613e+06	1731.5	1053.2	614.6	-18.6076	429.4	0
4.98613e+06	1720.6	1056	603.7	-18.6571	430.486	0
4.98614e+06	1726.2	1067.9	609.3	-18.8673	431.457	0
4.98616e+06	1755.7	1091	638.8	-19.2754	432.429	0
4.98619e+06	1797.4	1121.4	680.5	-19.8125	433.404	0
4.98618e+06	1807.2	1108.4	690.3	-19.5828	434.491	0
4.98604e+06	1460	969.2	343.1	-17.1235	435.465	0
4.98603e+06	1366.5	960	249.6	-16.961	436.435	0
4.98603e+06	1366.5	960.4	249.6	-16.968	437.405	0
4986037	1341.8	963.6	224.9	-17.0246	438.494	0
4986041	1332.3	967.6	215.4	-17.0952	439.466	0
4.98604e+06	1327.7	970.3	210.8	-17.1429	440.434	0
4.98604e+06	1307.5	970	190.6	-17.1376	441.403	0
4986047	1277.1	973.6	160.2	-17.2012	442.49	0
4.98605e+06	1269.1	977.7	152.2	-17.2737	443.463	0
4.98606e+06	1262.4	981.9	145.5	-17.3479	444.434	0
4.98606e+06	1254	985.9	137.1	-17.4185	445.518	0
4.98606e+06	1247.1	990.4	130.2	-17.498	446.487	0
4.98607e+06	1242.6	994.7	125.7	-17.574	447.457	0
4.98607e+06	1237.2	999.2	120.3	-17.6535	448.43	0
4986077	1232.5	1003.6	115.6	-17.7313	449.517	0
4.98608e+06	1228.5	1008.2	111.6	-17.8125	450.487	0
4.98609e+06	1225.3	1012.7	108.4	-17.892	451.466	0
4.98609e+06	1225.3	1017.5	108.4	-17.9768	452.434	0
4.9861e+06	1222.6	1022.2	105.7	-18.0599	453.518	0
4.9861e+06	1220.1	1026.7	103.2	-18.1394	454.487	0
4.9861e+06	1218	1031.5	101.1	-18.2242	455.461	0
4.98611e+06	1216.8	1036.3	99.9	-18.309	456.433	0
4.98611e+06	1215.5	1041	98.6	-18.392	457.518	0
4.98612e+06	1214.8	1045.8	97.9	-18.4768	458.487	0
4986124	1214.6	1050.6	97.7	-18.5616	459.461	0
4.98613e+06	1214.6	1055.5	97.7	-18.6482	460.433	0
4.98613e+06	1214.4	1060.2	97.5	-18.7312	461.517	0
4.98614e+06	1214.6	1065	97.7	-18.8161	462.486	0
4.98614e+06	1214.1	1069.7	97.2	-18.8991	463.458	0
4.98615e+06	1211.7	1074.4	94.8	-18.9821	464.432	0
4.98615e+06	1208.4	1079	91.5	-19.0634	465.517	0
4.98616e+06	1206.8	1083.7	89.9	-19.1464	466.487	0
4.98616e+06	1206.8	1088.4	89.9	-19.2295	467.461	0
4.98617e+06	1205.4	1093	88.5	-19.3107	468.433	0
4986171	1203.6	1097.6	86.7	-19.392	469.516	0
4.98618e+06	1201.8	1102.2	84.9	-19.4733	470.487	0
4.98618e+06	1198.9	1106.9	82	-19.5563	471.461	0
4.98618e+06	1197.3	1111.5	80.4	-19.6376	472.433	0
4.98619e+06	1196.1	1116.2	79.2	-19.7206	473.516	0
4.98619e+06	1194.9	1120.9	78	-19.8037	474.485	0
4.9862e+06	1193	1125.5	76.1	-19.8849	475.455	0
4.9862e+06	1191.8	1130.2	74.9	-19.968	476.54	0
4.98621e+06	1191.4	1134.8	74.5	-20.0493	477.512	0
4.98621e+06	1189.8	1139.5	72.9	-20.1323	478.484	0
4.98622e+06	1188.6	1144	71.7	-20.2118	479.455	0
4.98622e+06	1188.4	1148.8	71.5	-20.2966	480.54	0
4.98623e+06	1187.4	1153.5	70.5	-20.3797	481.512	0
4.98623e+06	1187.4	1158	70.5	-20.4592	482.484	0
4.98624e+06	1186.7	1162.7	69.8	-20.5422	483.455	0
4.98624e+06	1186.9	1167.4	70	-20.6252	484.538	0
4.98625e+06	1186.1	1172	69.2	-20.7065	485.512	0
4.98625e+06	1186.2	1176.7	69.3	-20.7895	486.484	0
4.98625e+06	1186	1181.2	69.1	-20.869	487.456	0
4.98626e+06	1185.9	1185.9	69	-20.9521	488.545	0
4.98626e+06	1185.4	1190.5	68.5	-21.0333	489.517	0
4.98627e+06	1184.6	1195.1	67.7	-21.1146	490.486	0
4.98627e+06	1184.9	1199.7	68	-21.1959	491.458	0
4.98628e+06	1185.5	1204.4	68.6	-21.2789	492.547	0
4.98628e+06	1186.6	1209	69.7	-21.3602	493.517	0
4.98629e+06	1187.9	1213.7	71	-21.4432	494.486	0
4.98629e+06	1189	1218.4	72.1	-21.5263	495.458	0
4.9863e+06	1190.7	1223	73.8	-21.6075	496.547	0
4.9863e+06	1190.7	1227.7	73.8	-21.6906	497.517	0
4.98631e+06	1192.3	1232.4	75.4	-21.7736	498.486	0
4.98631e+06	1193.9	1237	77	-21.8549	499.46	0
4.98632e+06	1196.4	1241.7	79.5	-21.9379	500.547	0
4.98632e+06	1199	1246.4	82.1	-22.021	501.526	0
4.98632e+06	1202.5	1251.3	85.6	-22.1075	502.498	0
4.98633e+06	1207.3	1256	90.4	-22.1906	503.472	0
4.98633e+06	1210.7	1260.7	93.8	-22.2736	504.557	0
4986339	1215.4	1265.6	98.5	-22.3602	505.528	0
4986344	1221.7	1270.6	104.8	-22.4485	506.502	0
4.98635e+06	1231	1275.8	114.1	-22.5404	507.474	0
4.98635e+06	1244.4	1281.5	127.5	-22.6411	508.559	0
4.98636e+06	1258.9	1287.4	142	-22.7453	509.529	0
4.98637e+06	1278.9	1294.1	162	-22.8637	510.503	0
4.98638e+06	1278.9	1301.9	162	-23.0015	511.475	0
4986385	1304.7	1311.6	187.8	-23.1729	512.56	0
4.9864e+06	1338.9	1325.1	222	-23.4114	513.529	0
4.98642e+06	1389	1344	272.1	-23.7453	514.503	0
4.98644e+06	1456.4	1371	339.5	-24.2224	515.475	0
4.98649e+06	1550	1414.2	433.1	-24.9856	516.56	0
4.98655e+06	1664.8	1479.4	547.9	-26.1375	517.529	0
4.98665e+06	1836.1	1576.5	719.2	-27.8531	518.503	0
4.98673e+06	1933.4	1651.9	816.5	-29.1852	519.474	0
4.98679e+06	2017.6	1719.5	900.7	-30.3795	520.559	0
4.98682e+06	2041.5	1744.7	924.6	-30.8248	521.528	0
4.98682e+06	2052.7	1749.9	935.8	-30.9166	522.499	0
4986795	2024	1721.6	907.1	-30.4167	523.586	0
4.98676e+06	1988	1681.8	871.1	-29.7135	524.558	0
4.98671e+06	1932.3	1635.9	815.4	-28.9025	525.528	0
4.9867e+06	1932.3	1628.9	815.4	-28.7788	526.498	0
4.9867e+06	1916.9	1621.9	800	-28.6552	527.586	0
4.98668e+06	1902.8	1608.2	785.9	-28.4131	528.558	0
4.98671e+06	1884.9	1638	768	-28.9396	529.527	0
4986725	1912.4	1651.6	795.5	-29.1799	530.498	0
4.98677e+06	1942.1	1697.4	825.2	-29.9891	531.586	0
4.98679e+06	1974.8	1717	857.9	-30.3354	532.557	0
4986865	2010.2	1791.6	893.3	-31.6534	533.527	0
4.98697e+06	2078.6	1893.1	961.7	-33.4466	534.498	0
4.98712e+06	2150.3	2044.3	1033.4	-36.118	535.586	0
4.98726e+06	2191	2183.2	1074.1	-38.572	536.558	0
4.98732e+06	2194.4	2246	1077.5	-39.6816	537.528	0
4.98737e+06	2192.1	2292.9	1075.2	-40.5102	538.498	0
4987404	2186.8	2330.6	1069.9	-41.1763	539.586	0
4.98743e+06	2182.1	2357.2	1065.2	-41.6462	540.558	0
4.98745e+06	2182.1	2372.2	1065.2	-41.9112	541.529	0
4.98748e+06	2178.4	2410.8	1061.5	-42.5932	542.499	0
4.98747e+06	2168.8	2399.4	1051.9	-42.3918	543.587	0
4987488	2174.8	2414.6	1057.9	-42.6603	544.558	0
4.98751e+06	2169.1	2434.5	1052.2	-43.0119	545.528	0
4.9875e+06	2166.1	2427.8	1049.2	-42.8935	546.501	0
4.9875e+06	2169.7	2424.2	1052.8	-42.8299	547.59	0
4.98751e+06	2172.5	2432.4	1055.6	-42.9748	548.56	0
4.98749e+06	2173.4	2419.9	1056.5	-42.754	549.528	0
4.98749e+06	2177.1	2417	1060.2	-42.7027	550.499	0
4.98748e+06	2181.8	2410.4	1064.9	-42.5861	551.59	0
4.98749e+06	2178.8	2417.4	1061.9	-42.7098	552.559	0
4.98748e+06	2183.6	2408.4	1066.7	-42.5508	553.529	0
4.98751e+06	2176.1	2440.8	1059.2	-43.1232	554.612	0
4.98748e+06	2176.1	2411.4	1059.2	-42.6038	555.583	0
4.98747e+06	2184.8	2399.1	1067.9	-42.3865	556.557	0
4.98744e+06	2188	2369.4	1071.1	-41.8618	557.528	0
4.98722e+06	2190.3	2145.7	1073.4	-37.9095	558.612	0
4.98688e+06	2113.7	1801.7	996.8	-31.8318	559.583	0
4.98679e+06	1906.8	1714.1	789.9	-30.2841	560.557	0
4.98676e+06	1816	1686.2	699.1	-29.7912	561.527	0
4.98673e+06	1765.7	1653.8	648.8	-29.2188	562.611	0
4.98669e+06	1678	1621	561.1	-28.6393	563.582	0
4.98669e+06	1621.1	1612.1	504.2	-28.482	564.555	0
4.98668e+06	1596.7	1607.7	479.8	-28.4043	565.527	0
4.98668e+06	1579.6	1606	462.7	-28.3743	566.612	0
4986680	1567.5	1606.6	450.6	-28.3849	567.582	0
4.98668e+06	1552.1	1605	435.2	-28.3566	568.555	0
4.98668e+06	1552.1	1601.7	435.2	-28.2983	569.527	0
4.98668e+06	1528.5	1603	411.6	-28.3213	570.612	0
4.98668e+06	1519.7	1603	402.8	-28.3213	571.583	0
4.98668e+06	1504.7	1604.9	387.8	-28.3548	572.556	0
4986680	1500.3	1606.6	383.4	-28.3849	573.527	0
4986684	1494.8	1610.6	377.9	-28.4555	574.611	0
4.98669e+06	1490.2	1613.3	373.3	-28.5032	575.583	0
4986690	1490.1	1616.6	373.2	-28.5615	576.556	0
4.98669e+06	1484.3	1619	367.4	-28.6039	577.528	0
4.9867e+06	1480.2	1622.5	363.3	-28.6658	578.612	0
4986702	1488.4	1628.6	371.5	-28.7736	579.586	0
4.9867e+06	1484.9	1630.7	368	-28.8106	580.557	0
4.98671e+06	1478.7	1632.9	361.8	-28.8495	581.532	0
4.98671e+06	1475.7	1636.4	358.8	-28.9114	582.621	0
4.98671e+06	1466.4	1637.1	349.5	-28.9237	583.591	0
4.98671e+06	1466.4	1638.5	349.5	-28.9485	584.56	0
4.98671e+06	1456.4	1641.5	339.5	-29.0015	585.529	0
4.98672e+06	1452.2	1642.9	335.3	-29.0262	586.615	0
4.98672e+06	1443.1	1643.4	326.2	-29.035	587.589	0
4.98672e+06	1428.1	1644.9	311.2	-29.0615	588.559	0
4.98672e+06	1421.1	1647	304.2	-29.0986	589.642	0
4.98672e+06	1416.5	1650.5	299.6	-29.1605	590.612	0
4.98673e+06	1411.6	1652.5	294.7	-29.1958	591.586	0
4.98673e+06	1405.8	1656	288.9	-29.2577	592.557	0
4.98673e+06	1407.4	1660.2	290.5	-29.3318	593.641	0
4.98674e+06	1408.8	1663.9	291.9	-29.3972	594.61	0
4.98674e+06	1404.4	1666.7	287.5	-29.4467	595.58	0
4.98674e+06	1401.8	1669.7	284.9	-29.4997	596.551	0
4.98674e+06	1393.9	1671.5	277	-29.5315	597.634	0
4.98675e+06	1387.3	1673.8	270.4	-29.5721	598.608	0
4.98675e+06	1387.3	1671.7	270.4	-29.535	599.581	0
4986747	1358.8	1673.6	241.9	-29.5686	600.551	0
4.98675e+06	1351.6	1677.7	234.7	-29.641	601.642	0
4.98676e+06	1351.7	1681.9	234.8	-29.7152	602.611	0
4.98676e+06	1357.7	1686.2	240.8	-29.7912	603.583	0
4.98676e+06	1357	1689.1	240.1	-29.8424	604.556	0
4.98677e+06	1355.8	1693.3	238.9	-29.9167	605.641	0
4.98677e+06	1360	1697.5	243.1	-29.9908	606.612	0
4.98678e+06	1364.7	1702.9	247.8	-30.0863	607.586	0
4.98678e+06	1371.7	1706.9	254.8	-30.1569	608.557	0
4.98678e+06	1374.4	1711.5	257.5	-30.2382	609.642	0
4.98679e+06	1378.4	1715.7	261.5	-30.3124	610.611	0
4.9868e+06	1390.1	1722.2	273.2	-30.4273	611.583	0
4.9868e+06	1396.6	1726.8	279.7	-30.5085	612.559	0
4.98681e+06	1407	1732.7	290.1	-30.6128	613.642	0
4.98681e+06	1407	1737.4	290.1	-30.6958	614.611	0
4.98681e+06	1411.4	1741	294.5	-30.7594	615.583	0
4.98682e+06	1412.8	1746	295.9	-30.8477	616.557	0
4.98682e+06	1420.2	1750.3	303.3	-30.9237	617.641	0
4.98683e+06	1419.9	1753.9	303	-30.9873	618.612	0
4.98683e+06	1425.4	1759.7	308.5	-31.0898	619.586	0
4.98684e+06	1433.1	1764.4	316.2	-31.1728	620.673	0
4.98684e+06	1438.8	1769.9	321.9	-31.27	621.643	0
4.98685e+06	1449.3	1776.1	332.4	-31.3795	622.612	0
4986856	1460	1782.6	343.1	-31.4944	623.583	0
4.98686e+06	1472.4	1789	355.5	-31.6075	624.672	0
4.98687e+06	1479.2	1793.9	362.3	-31.694	625.642	0
4.98687e+06	1487.5	1799.7	370.6	-31.7965	626.611	0
4.98688e+06	1498	1806	381.1	-31.9078	627.582	0
4.98688e+06	1504.9	1811.5	388	-32.005	628.671	0
4.98689e+06	1504.9	1814.7	388	-32.0615	629.643	0
4.9869e+06	1504.9	1823.4	388	-32.2152	630.612	0
4986907	1524.7	1833.6	407.8	-32.3954	631.586	0
4.98692e+06	1546.3	1842.7	429.4	-32.5562	632.672	0
4.98693e+06	1566.1	1852.2	449.2	-32.724	633.642	0
4.98694e+06	1583.2	1864	466.3	-32.9325	634.611	0
4.98694e+06	1610	1869.7	493.1	-33.0332	635.583	0
4.98694e+06	1599.7	1869.5	482.8	-33.0297	636.672	0
4.98694e+06	1593.6	1871.4	476.7	-33.0633	637.642	0
4.98695e+06	1599.1	1877.1	482.2	-33.164	638.611	0
4.98694e+06	1571.3	1863.4	454.4	-32.9219	639.583	0
4.98692e+06	1481.5	1842.5	364.6	-32.5527	640.672	0
4.98692e+06	1470	1844.4	353.1	-32.5862	641.642	0
4.98692e+06	1474.2	1849	357.3	-32.6675	642.611	0
4.98693e+06	1474.2	1855	357.3	-32.7735	643.587	0
4.98693e+06	1483.6	1853.7	366.7	-32.7505	644.674	0
4.98696e+06	1467.4	1889.4	350.5	-33.3813	645.646	0
4.98691e+06	1219.2	1835.2	102.3	-32.4237	646.619	0
4.9869e+06	988.59	1829.9	-128.31	-32.33	647.591	0
4.98691e+06	974.36	1833.2	-142.54	-32.3884	648.676	0
4.98691e+06	974.97	1836.4	-141.93	-32.4449	649.65	0
4986913	974.92	1839.6	-141.98	-32.5014	650.623	0
4.98692e+06	974.17	1842.8	-142.73	-32.558	651.601	0
4.98692e+06	974.84	1846	-142.06	-32.6145	652.684	0
4.98692e+06	974.32	1849.2	-142.58	-32.671	653.653	0
4.98693e+06	974.35	1852.4	-142.55	-32.7276	654.627	0
4986929	974.39	1855.6	-142.51	-32.7841	655.599	0
4.98693e+06	974.44	1858.7	-142.46	-32.8389	656.684	0
4.98694e+06	974.5	1861.9	-142.4	-32.8954	657.653	0
4.98694e+06	974.5	1865	-142.4	-32.9502	658.627	0
4.98694e+06	974.56	1868.1	-142.34	-33.005	659.601	0
4.98694e+06	974.66	1871.2	-142.24	-33.0597	660.684	0
4.98695e+06	974.89	1874.2	-142.01	-33.1127	661.653	0
4.98695e+06	975.23	1877.3	-141.67	-33.1675	662.627	0
4.98695e+06	975.6	1880.2	-141.3	-33.2187	663.599	0
4.98696e+06	975.82	1883.2	-141.08	-33.2717	664.684	0
4.98696e+06	976.14	1886.2	-140.76	-33.3247	665.651	0
4.98696e+06	975.65	1889.3	-141.25	-33.3795	666.623	0
4.98697e+06	975.63	1892.2	-141.27	-33.4308	667.712	0
4.98697e+06	975.72	1895.2	-141.18	-33.4838	668.684	0
4986973	984.58	1899.6	-132.32	-33.5615	669.653	0
4.98697e+06	982.47	1900.2	-134.43	-33.5721	670.627	0
4.98698e+06	975.68	1904	-141.22	-33.6392	671.714	0
4.98698e+06	976.19	1906.7	-140.71	-33.6869	672.686	0
4986983	976.19	1909.6	-140.71	-33.7382	673.657	0
4986986	976.01	1912.6	-140.89	-33.7912	674.629	0
4.98699e+06	975.4	1915.4	-141.5	-33.8406	675.716	0
4.98699e+06	975.43	1918.1	-141.47	-33.8883	676.685	0
4.98699e+06	975.48	1920.9	-141.42	-33.9378	677.654	0
4.987e+06	975.59	1923.5	-141.31	-33.9838	678.628	0
4.98703e+06	989.91	1953.5	-126.99	-34.5138	679.715	0
4.98702e+06	1031.9	1947.4	-85	-34.406	680.685	0
4.987e+06	1007.5	1927.9	-109.4	-34.0615	681.654	0
4.987e+06	997.2	1931.5	-119.7	-34.1251	682.628	0
4.98701e+06	988.22	1934.4	-128.68	-34.1763	683.715	0
4.98701e+06	985.53	1937.3	-131.37	-34.2276	684.685	0
4.98701e+06	984.45	1940	-132.45	-34.2753	685.654	0
4987016	984.2	1942.6	-132.7	-34.3212	686.628	0
4.98702e+06	984.02	1945.2	-132.88	-34.3671	687.715	0
4.98702e+06	984.02	1947.7	-132.88	-34.4113	688.685	0
4.98702e+06	984.06	1950.2	-132.84	-34.4555	689.654	0
4.98703e+06	984.22	1952.7	-132.68	-34.4996	690.628	0
4.98703e+06	984.36	1955.1	-132.54	-34.542	691.713	0
4.98703e+06	984.54	1957.7	-132.36	-34.588	692.683	0
4.98703e+06	984.78	1960.2	-132.12	-34.6322	693.652	0
4987036	985.08	1962.6	-131.82	-34.6746	694.735	0
4.98704e+06	985.39	1965.1	-131.51	-34.7187	695.705	0
4987041	985.82	1967.6	-131.08	-34.7629	696.675	0
4.98704e+06	986.27	1970.1	-130.63	-34.8071	697.643	0
4987046	986.71	1972.6	-130.19	-34.8512	698.726	0
4.98705e+06	987.29	1975	-129.61	-34.8936	699.695	0
4987051	987.89	1977.6	-129.01	-34.9396	700.665	0
4.98705e+06	987.89	1980.1	-129.01	-34.9837	701.638	0
4.98706e+06	988.85	1982.5	-128.05	-35.0261	702.723	0
4.98706e+06	989.72	1985	-127.18	-35.0703	703.694	0
4987061	990.69	1987.6	-126.21	-35.1162	704.664	0
4.98706e+06	991.57	1990.2	-125.33	-35.1622	705.749	0
4.98707e+06	992.45	1992.7	-124.45	-35.2064	706.721	0
4.98707e+06	993.66	1995.4	-123.24	-35.254	707.693	0
4.98707e+06	994.72	1997.9	-122.18	-35.2982	708.664	0
4987074	995.53	2000.6	-121.37	-35.3459	709.749	0
4.98708e+06	996.19	2003.5	-120.71	-35.3972	710.721	0
4.98708e+06	996.54	2006.2	-120.36	-35.4449	711.693	0
4.98708e+06	996.81	2009	-120.09	-35.4943	712.664	0
4.98709e+06	997.11	2012	-119.79	-35.5473	713.749	0
4.98709e+06	997.1	2014.9	-119.8	-35.5986	714.721	0
4.98709e+06	996.7	2017.9	-120.2	-35.6516	715.693	0
4.98709e+06	996.7	2021.1	-120.2	-35.7081	716.664	0
4.9871e+06	996.18	2024.1	-120.72	-35.7611	717.749	0
4.9871e+06	995.94	2027.2	-120.96	-35.8159	718.721	0
4.9871e+06	995.45	2030.5	-121.45	-35.8742	719.693	0
4987107	994.94	2033.6	-121.96	-35.929	720.664	0
4.98711e+06	994.74	2036.9	-122.16	-35.9873	721.749	0
4.98711e+06	994.34	2040	-122.56	-36.042	722.721	0
4.98712e+06	994.01	2043.4	-122.89	-36.1021	723.693	0
4.98712e+06	993.64	2046.7	-123.26	-36.1604	724.664	0
4.98712e+06	993.27	2050	-123.63	-36.2187	725.749	0
4.98713e+06	993	2053.4	-123.9	-36.2788	726.721	0
4.98713e+06	992.76	2056.7	-124.14	-36.3371	727.693	0
4.98713e+06	992.48	2060.1	-124.42	-36.3972	728.664	0
4987137	992.33	2063.6	-124.57	-36.459	729.749	0
4.98714e+06	992.07	2067	-124.83	-36.5191	730.721	0
4.98714e+06	992.07	2070.5	-124.83	-36.5809	731.693	0
4.98715e+06	991.94	2074	-124.96	-36.6427	732.666	0
4.98715e+06	991.65	2077.5	-125.25	-36.7046	733.753	0
4.98715e+06	991.56	2081.1	-125.34	-36.7682	734.725	0
4.98716e+06	991.35	2084.7	-125.55	-36.8318	735.694	0
4.98716e+06	991.1	2088.4	-125.8	-36.8971	736.664	0
4.98717e+06	990.79	2092	-126.11	-36.9607	737.749	0
4987169	990.54	2095.6	-126.36	-37.0243	738.721	0
4.98717e+06	990.39	2099.3	-126.51	-37.0897	739.693	0
4.98718e+06	990.16	2103	-126.74	-37.1551	740.777	0
4.98718e+06	989.94	2106.7	-126.96	-37.2205	741.747	0
4987184	989.66	2110.6	-127.24	-37.2894	742.717	0
4.98719e+06	989.48	2114.4	-127.42	-37.3565	743.685	0
4.98719e+06	989.31	2118.2	-127.59	-37.4236	744.768	0
4.9872e+06	989.14	2122	-127.76	-37.4908	745.737	0
4.9872e+06	989.14	2125.9	-127.76	-37.5597	746.707	0
4.9872e+06	989.02	2129.7	-127.88	-37.6268	747.679	0
4987207	988.84	2133.6	-128.06	-37.6957	748.764	0
4.98721e+06	988.69	2137.5	-128.21	-37.7646	749.735	0
4.98721e+06	988.48	2141.5	-128.42	-37.8353	750.705	0
4.98722e+06	988.38	2145.5	-128.52	-37.906	751.79	0
4.98722e+06	988.35	2149.4	-128.55	-37.9749	752.762	0
4.98723e+06	988.27	2153.5	-128.63	-38.0473	753.734	0
4.98723e+06	988.15	2157.5	-128.75	-38.118	754.705	0
4.98723e+06	988.08	2161.5	-128.82	-38.1887	755.79	0
4.98724e+06	987.93	2165.5	-128.97	-38.2593	756.762	0
4987243	987.91	2169.6	-128.99	-38.3318	757.734	0
4.98725e+06	987.9	2173.7	-129	-38.4042	758.705	0
4.98725e+06	987.79	2177.8	-129.11	-38.4766	759.79	0
4.98726e+06	987.68	2182	-129.22	-38.5508	760.762	0
4.98726e+06	987.68	2186	-129.22	-38.6215	761.734	0
4.98726e+06	987.6	2190.3	-129.3	-38.6975	762.705	0
4.98727e+06	987.54	2194.4	-129.36	-38.7699	763.79	0
4987272	987.45	2198.6	-129.45	-38.8441	764.762	0
4.98728e+06	987.44	2202.7	-129.46	-38.9166	765.734	0
4.98728e+06	987.52	2207	-129.38	-38.9925	766.705	0
4.98728e+06	987.49	2211.3	-129.41	-39.0685	767.79	0
4.98729e+06	987.47	2215.5	-129.43	-39.1427	768.762	0
4.98729e+06	987.39	2219.8	-129.51	-39.2187	769.734	0
4.9873e+06	987.38	2224	-129.52	-39.2929	770.706	0
4.9873e+06	987.34	2228.4	-129.56	-39.3706	771.791	0
4987306	987.32	2232.6	-129.58	-39.4448	772.763	0
4.98731e+06	987.29	2237	-129.61	-39.5226	773.734	0
4.98731e+06	987.29	2241.4	-129.61	-39.6003	774.706	0
4.98732e+06	987.18	2245.8	-129.72	-39.678	775.791	0
4.98732e+06	987.07	2250.1	-129.83	-39.754	776.763	0
4.98733e+06	987.05	2254.5	-129.85	-39.8317	777.734	0
4.98733e+06	987.02	2258.9	-129.88	-39.9095	778.708	0
4.98734e+06	986.96	2263.3	-129.94	-39.9872	779.794	0
4.98734e+06	986.94	2267.8	-129.96	-40.0667	780.766	0
4.98735e+06	986.84	2272.1	-130.06	-40.1427	781.735	0
4987350	986.84	2276.6	-130.06	-40.2222	782.705	0
4.98735e+06	986.82	2281	-130.08	-40.2999	783.79	0
4.98736e+06	986.78	2285.5	-130.12	-40.3794	784.762	0
4.98736e+06	986.76	2290	-130.14	-40.4589	785.734	0
4.98737e+06	986.76	2294.5	-130.14	-40.5384	786.818	0
4.98737e+06	986.73	2299	-130.17	-40.618	787.79	0
4.98738e+06	986.62	2303.5	-130.28	-40.6975	788.762	0
4.98738e+06	986.62	2308	-130.28	-40.777	789.734	0
4987386	986.52	2312.6	-130.38	-40.8582	790.818	0
4.98739e+06	986.34	2317.2	-130.56	-40.9395	791.79	0
4987395	986.28	2321.6	-130.62	-41.0172	792.762	0
4.9874e+06	986.26	2326.3	-130.64	-41.1003	793.734	0
4.9874e+06	986.26	2330.7	-130.64	-41.178	794.818	0
4.98741e+06	986.21	2335.4	-130.69	-41.2611	795.79	0
4.98741e+06	986.19	2339.9	-130.71	-41.3406	796.762	0
4.98742e+06	986.19	2344.5	-130.71	-41.4218	797.734	0
4.98742e+06	986.09	2349.1	-130.81	-41.5031	798.818	0
4.98743e+06	985.97	2353.7	-130.93	-41.5844	799.79	0
4.98743e+06	985.96	2358.3	-130.94	-41.6656	800.762	0
4.98744e+06	985.93	2362.9	-130.97	-41.7469	801.734	0
4.98744e+06	985.95	2367.5	-130.95	-41.8282	802.819	0
4.98745e+06	985.93	2372.1	-130.97	-41.9095	803.789	0
4.98745e+06	985.93	2376.9	-130.97	-41.9943	804.759	0
4.98745e+06	985.87	2381.5	-131.03	-42.0755	805.731	0
4.98746e+06	985.85	2386.1	-131.05	-42.1568	806.816	0
4.98746e+06	985.89	2390.7	-131.01	-42.2381	807.787	0
4.98747e+06	985.82	2395.4	-131.08	-42.3211	808.757	0
4.98747e+06	985.8	2400	-131.1	-42.4024	809.84	0
4.98748e+06	985.8	2404.7	-131.1	-42.4854	810.81	0
4.98748e+06	985.83	2409.4	-131.07	-42.5685	811.779	0
4.98749e+06	985.82	2414	-131.08	-42.6497	812.749	0
4.98749e+06	985.79	2418.7	-131.11	-42.7328	813.836	0
4.9875e+06	985.75	2423.5	-131.15	-42.8176	814.808	0
4.9875e+06	985.68	2428.2	-131.22	-42.9006	815.777	0
4.98751e+06	985.68	2432.8	-131.22	-42.9819	816.747	0
4.98751e+06	985.76	2437.5	-131.14	-43.0649	817.832	0
4.98752e+06	985.79	2442.2	-131.11	-43.148	818.804	0
4.98752e+06	985.79	2446.9	-131.11	-43.231	819.776	0
4987525	985.82	2451.6	-131.08	-43.314	820.747	0
4.98753e+06	985.8	2456.4	-131.1	-43.3988	821.832	0
4.98753e+06	985.79	2461.1	-131.11	-43.4819	822.804	0
4.98754e+06	985.78	2465.7	-131.12	-43.5632	823.776	0
4.98754e+06	985.76	2470.5	-131.14	-43.648	824.747	0
4.98755e+06	985.76	2475.3	-131.14	-43.7328	825.832	0
4.98755e+06	985.94	2480	-130.96	-43.8158	826.804	0
4987558	986.03	2484.6	-130.87	-43.8971	827.776	0
4.98756e+06	986.14	2489.4	-130.76	-43.9819	828.745	0
4.98757e+06	986.22	2494	-130.68	-44.0632	829.83	0
4.98757e+06	986.22	2498.8	-130.68	-44.148	830.8	0
4987577	986.25	2503.6	-130.65	-44.2328	831.768	0
4.98758e+06	986.49	2508.3	-130.41	-44.3158	832.851	0
4.98759e+06	986.62	2513	-130.28	-44.3988	833.82	0
4.98759e+06	986.62	2517.8	-130.28	-44.4836	834.79	0
4.9876e+06	986.8	2522.5	-130.1	-44.5667	835.762	0
4.9876e+06	986.85	2527.2	-130.05	-44.6497	836.847	0
4.98761e+06	986.96	2532	-129.94	-44.7345	837.818	0
4.98761e+06	987.12	2536.7	-129.78	-44.8176	838.79	0
4.98761e+06	987.25	2541.5	-129.65	-44.9024	839.762	0
4.98762e+06	987.42	2546.2	-129.48	-44.9854	840.847	0
4.98762e+06	987.63	2550.9	-129.27	-45.0684	841.818	0
4987629	987.94	2555.6	-128.96	-45.1515	842.79	0
4.98763e+06	988.32	2560.2	-128.58	-45.2328	843.764	0
4.98764e+06	988.64	2565	-128.26	-45.3175	844.849	0
4.98764e+06	989	2569.7	-127.9	-45.4006	845.818	0
4.98765e+06	989.38	2574.5	-127.52	-45.4854	846.79	0
4.98765e+06	989.38	2579.1	-127.52	-45.5667	847.762	0
4.98766e+06	990.11	2583.8	-126.79	-45.6497	848.847	0
4.98766e+06	990.11	2588.5	-126.79	-45.7327	849.818	0
4.98767e+06	990.5	2593.2	-126.4	-45.8158	850.79	0
4.98767e+06	990.94	2597.9	-125.96	-45.8988	851.878	0
4987676	991.35	2602.6	-125.55	-45.9819	852.85	0
4.98768e+06	991.88	2607.2	-125.02	-46.0631	853.819	0
4.98769e+06	992.52	2611.8	-124.38	-46.1444	854.789	0
4987690	993.17	2616.6	-123.73	-46.2292	855.874	0
4.98769e+06	993.77	2621.2	-123.13	-46.3105	856.846	0
4.9877e+06	994.42	2625.8	-122.48	-46.3917	857.818	0
4.9877e+06	995.24	2630.5	-121.66	-46.4748	858.789	0
4.98771e+06	996.04	2635	-120.86	-46.5543	859.874	0
4987713	997.03	2639.6	-119.87	-46.6356	860.846	0
4.98772e+06	998.14	2644.2	-118.76	-46.7168	861.818	0
4.98772e+06	998.14	2648.7	-118.76	-46.7963	862.789	0
4.98773e+06	999.45	2653.3	-117.45	-46.8776	863.874	0
4.98773e+06	1000.8	2657.7	-116.1	-46.9553	864.846	0
4.98774e+06	1002.5	2662.1	-114.4	-47.0331	865.818	0
4.98774e+06	1004.7	2666.5	-112.2	-47.1108	866.789	0
4.98774e+06	1007.5	2670.7	-109.4	-47.185	867.874	0
4.98775e+06	1011.2	2674.7	-105.7	-47.2557	868.846	0
4.98775e+06	1016.7	2678.5	-100.2	-47.3228	869.818	0
4987755	1026.4	2681.6	-90.5	-47.3776	870.789	0
4.98776e+06	1042	2684.2	-74.9	-47.4235	871.874	0
4.98776e+06	1066.6	2686.4	-50.3	-47.4624	872.846	0
4.98776e+06	1101.7	2688.9	-15.2	-47.5066	873.818	0
4.98777e+06	1135.1	2692.9	18.2	-47.5772	874.793	0
4.98777e+06	1173.1	2698	56.2	-47.6673	875.88	0
4.98778e+06	1215	2704.5	98.1	-47.7822	876.85	0
4987785	1215	2711.6	98.1	-47.9076	877.819	0
4.98779e+06	1252.2	2718.4	135.3	-48.0278	878.791	0
4.9878e+06	1275.1	2724.7	158.2	-48.1391	879.878	0
4987803	1288.6	2729.6	171.7	-48.2257	880.85	0
4.98781e+06	1289.8	2734.2	172.9	-48.3069	881.819	0
4.98781e+06	1289	2738.7	172.1	-48.3864	882.902	0
4.98782e+06	1288.1	2743.4	171.2	-48.4695	883.872	0
4.98782e+06	1287.1	2747.7	170.2	-48.5454	884.842	0
4.98783e+06	1282.7	2751.9	165.8	-48.6196	885.81	0
4.98783e+06	1279.7	2756.4	162.8	-48.6991	886.893	0
4.98783e+06	1276.1	2760.4	159.2	-48.7698	887.862	0
4987837	1263.9	2763.6	147	-48.8263	888.832	0
4.98784e+06	1257.9	2768	141	-48.9041	889.806	0
4.98784e+06	1245.8	2771.5	128.9	-48.9659	890.891	0
4.98785e+06	1245	2776.2	128.1	-49.049	891.86	0
4.98785e+06	1245	2780.1	128.1	-49.1179	892.83	0
4.98786e+06	1235.9	2783.9	119	-49.185	893.915	0
4.98786e+06	1222.5	2788.2	105.6	-49.261	894.887	0
4.98787e+06	1218.5	2792.4	101.6	-49.3352	895.859	0
4.98787e+06	1203.9	2796.2	87	-49.4023	896.83	0
4.98787e+06	1190.6	2800.4	73.7	-49.4765	897.915	0
4987878	1174.3	2804.6	57.4	-49.5507	898.887	0
4.98788e+06	1160.7	2809.1	43.8	-49.6302	899.859	0
4987887	1145.8	2813.6	28.9	-49.7097	900.83	0
4.98789e+06	1138.6	2818.2	21.7	-49.791	901.916	0
4.9879e+06	1131.3	2822.9	14.4	-49.874	902.888	0
4.9879e+06	1131.2	2827.5	14.3	-49.9553	903.859	0
4.98791e+06	1134.2	2832	17.3	-50.0348	904.831	0
4987910	1134.4	2836.6	17.5	-50.1161	905.916	0
4.98791e+06	1138.2	2841.1	21.3	-50.1956	906.888	0
4987919	1138.2	2845.6	21.3	-50.2751	907.859	0
4.98792e+06	1151.4	2850.5	34.5	-50.3617	908.831	0
4.98793e+06	1176.4	2856.4	59.5	-50.4659	909.916	0
4.98794e+06	1216.5	2863.7	99.6	-50.5949	910.888	0
4.98795e+06	1262.5	2872.7	145.6	-50.7539	911.859	0
4.98795e+06	1304.4	2880.3	187.5	-50.8882	912.831	0
4987959	1316.7	2885.6	199.8	-50.9818	913.916	0
4.98797e+06	1324.3	2891.9	207.4	-51.0931	914.888	0
4.98797e+06	1337.9	2898	221	-51.2009	915.859	0
4.98798e+06	1342.7	2903.4	225.8	-51.2963	916.831	0
4.98798e+06	1349.5	2909	232.6	-51.3952	917.916	0
4.98799e+06	1358	2915.2	241.1	-51.5048	918.888	0
4.98799e+06	1363.2	2920.4	246.3	-51.5966	919.859	0
4987999	1367.1	2925.6	250.2	-51.6885	920.833	0
4.988e+06	1371.5	2930.9	254.6	-51.7822	921.92	0
4.98801e+06	1371.5	2936	254.6	-51.8723	922.891	0
4.98802e+06	1374.6	2942.3	257.7	-51.9836	923.86	0
4988039	1395.1	2965.6	278.2	-52.3952	924.83	0
4.98804e+06	1463.4	2970.4	346.5	-52.48	925.915	0
4.98804e+06	1458.9	2970.1	342	-52.4747	926.887	0
4.98803e+06	1421.1	2961	304.2	-52.3139	927.859	0
4.98803e+06	1367.7	2960.2	250.8	-52.2998	928.943	0
4.98803e+06	1355.2	2960.9	238.3	-52.3122	929.915	0
4.98804e+06	1328.3	2963.4	211.4	-52.3563	930.887	0
4.98804e+06	1344.6	2970.5	227.7	-52.4818	931.859	0
4.98805e+06	1355.5	2977	238.6	-52.5966	932.943	0
4.98805e+06	1343.9	2978.5	227	-52.6231	933.915	0
4.98805e+06	1325.4	2980.3	208.5	-52.6549	934.887	0
4.98806e+06	1329	2985.1	212.1	-52.7397	935.859	0
4.98806e+06	1327.9	2989.5	211	-52.8175	936.943	0
4988067	1327.9	2993.6	211	-52.8899	937.915	0
4.98807e+06	1328.2	2998.7	211.3	-52.98	938.889	0
4.98808e+06	1332.7	3003.8	215.8	-53.0701	939.86	0
4.98808e+06	1336.2	3011.1	219.3	-53.1991	940.945	0
4.98809e+06	1363	3020	246.1	-53.3563	941.919	0
4.9881e+06	1383.8	3028.2	266.9	-53.5012	942.891	0
4.98811e+06	1395	3033.4	278.1	-53.5931	943.862	0
4.98811e+06	1401.6	3039.4	284.7	-53.6991	944.949	0
4.98812e+06	1412.6	3046.4	295.7	-53.8228	945.923	0
4.98813e+06	1421.4	3052.7	304.5	-53.9341	946.893	0
4.98813e+06	1423.2	3057.1	306.3	-54.0118	947.862	0
4.98814e+06	1426.5	3061.9	309.6	-54.0966	948.949	0
4.98814e+06	1425.5	3065.9	308.6	-54.1673	949.923	0
4988140	1410.3	3066.6	293.4	-54.1797	950.893	0
4988138	1410.3	3064.6	293.4	-54.1443	951.862	0
4.98813e+06	1376.2	3055.2	259.3	-53.9782	952.945	0
4988129	1299	3055.6	182.1	-53.9853	953.915	0
4988132	1271.6	3058.6	154.7	-54.0383	954.887	0
4.98814e+06	1260.3	3061.7	143.4	-54.0931	955.859	0
4.98814e+06	1245.1	3064.8	128.2	-54.1478	956.943	0
4.98814e+06	1232.2	3068.5	115.3	-54.2132	957.915	0
4.98815e+06	1223.2	3072.3	106.3	-54.2803	958.888	0
4.98815e+06	1216.3	3076.2	99.4	-54.3493	959.861	0
4.98815e+06	1210.2	3080.1	93.3	-54.4182	960.944	0
4.98816e+06	1205.7	3084.1	88.8	-54.4888	961.914	0
4.98816e+06	1197.2	3087.9	80.3	-54.556	962.884	0
4.98817e+06	1189.3	3091.9	72.4	-54.6266	963.967	0
4.98817e+06	1181.8	3095.8	64.9	-54.6955	964.935	0
4.98817e+06	1181.8	3099.7	64.9	-54.7644	965.903	0
4.98818e+06	1172.9	3104	56	-54.8404	966.877	0
4.98818e+06	1131.8	3108.7	14.9	-54.9235	967.964	0
4.98819e+06	1106.6	3113.7	-10.3	-55.0118	968.934	0
4.98819e+06	1094	3118.5	-22.9	-55.0966	969.903	0
4.9882e+06	1084	3123.5	-32.9	-55.1849	970.877	0
4.9882e+06	1073	3128.4	-43.9	-55.2715	971.964	0
4.98821e+06	1065.8	3132.9	-51.1	-55.351	972.934	0
4.98821e+06	1062.3	3137.4	-54.6	-55.4305	973.903	0
4.98822e+06	1058	3141.9	-58.9	-55.51	974.879	0
4.98822e+06	1053.8	3146.5	-63.1	-55.5913	975.966	0
4.98822e+06	1048.3	3151.2	-68.6	-55.6743	976.938	0
4988229	1044.9	3155.6	-72	-55.7521	977.911	0
4.98823e+06	1041.5	3160	-75.4	-55.8298	978.883	0
4.98824e+06	1038.4	3164.5	-78.5	-55.9093	979.968	0
4.98824e+06	1038.4	3168.7	-78.5	-55.9835	980.942	0
4.98825e+06	1036.2	3173.1	-80.7	-56.0613	981.915	0
4.98825e+06	1034.5	3177.2	-82.4	-56.1337	982.889	0
4988255	1032.7	3181.6	-84.2	-56.2114	983.974	0
4.98826e+06	1030	3185.9	-86.9	-56.2874	984.945	0
4.98826e+06	1028.2	3190.2	-88.7	-56.3634	985.919	0
4.98827e+06	1027	3194.4	-89.9	-56.4376	986.891	0
4.98827e+06	1026.2	3198.5	-90.7	-56.51	987.976	0
4.98828e+06	1025.6	3202.5	-91.3	-56.5807	988.945	0
4.98828e+06	1025.5	3206.5	-91.4	-56.6514	989.919	0
4.98828e+06	1025.5	3210.5	-91.4	-56.722	990.893	0
4.98829e+06	1025.3	3214.4	-91.6	-56.7909	991.976	0
4.98829e+06	1025.2	3218.4	-91.7	-56.8616	992.945	0
4.9883e+06	1024.8	3222.4	-92.1	-56.9323	993.919	0
4.9883e+06	1024.8	3226.4	-92.1	-57.0029	994.891	0
4.9883e+06	1024.7	3230.4	-92.2	-57.0736	995.976	0
4.98831e+06	1024.7	3234.2	-92.2	-57.1407	996.945	0
4.98831e+06	1024.9	3238	-92	-57.2079	997.919	0
4.98832e+06	1025.2	3242.4	-91.7	-57.2856	999.006	0
4.98832e+06	1020.2	3247.2	-96.7	-57.3704	999.976	0
4.98832e+06	1016.2	3251.4	-100.7	-57.4446	1000.95	0
4.98833e+06	1015.1	3255.3	-101.8	-57.5135	1001.92	0
4.98833e+06	1014.5	3259.2	-102.4	-57.5824	1003.01	0
4.98834e+06	1013.7	3263.3	-103.2	-57.6549	1003.98	0
4.98834e+06	1013.2	3267.2	-103.7	-57.7238	1004.96	0
4.98834e+06	1012	3271.4	-104.9	-57.798	1005.93	0
4.98835e+06	1010.4	3275.4	-106.5	-57.8687	1006.9	0
4.98835e+06	1009.4	3279.3	-107.5	-57.9376	1007.99	0
4.98836e+06	1008.5	3283.2	-108.4	-58.0065	1008.96	0
4.98836e+06	1008.5	3287	-108.4	-58.0736	1009.93	0
4.98836e+06	1007.9	3290.9	-109	-58.1425	1011.02	0
4.98837e+06	1007.1	3294.7	-109.8	-58.2096	1011.99	0
4.98837e+06	1006.8	3298.5	-110.1	-58.2768	1012.96	0
4.98838e+06	1006.9	3302.3	-110	-58.3439	1013.93	0
4.98838e+06	1006.9	3306	-110	-58.4093	1015.02	0
4988383	1007.1	3309.6	-109.8	-58.4729	1015.99	0
4.98839e+06	1007.6	3313.4	-109.3	-58.54	1016.96	0
4.98839e+06	1008	3317	-108.9	-58.6036	1017.93	0
4988394	1008.4	3320.6	-108.5	-58.6672	1019.02	0
4.9884e+06	1009.4	3324.3	-107.5	-58.7326	1019.99	0
4.9884e+06	1010.1	3327.9	-106.8	-58.7962	1020.96	0
4.98841e+06	1006.8	3332.4	-110.1	-58.8757	1021.93	0
4.98841e+06	1003.6	3336.5	-113.3	-58.9481	1023.02	0
4.98841e+06	1002	3340.4	-114.9	-59.017	1023.99	0
4.98842e+06	1002	3344.2	-114.9	-59.0842	1024.96	0
4.98842e+06	1001	3348	-115.9	-59.1513	1025.93	0
4.98843e+06	1000.3	3351.7	-116.6	-59.2167	1027.02	0
4.98843e+06	999.98	3355.5	-116.92	-59.2838	1027.99	0
4.98843e+06	999.97	3359	-116.93	-59.3457	1028.96	0
4.98844e+06	1000.3	3362.7	-116.6	-59.411	1029.93	0
4.98844e+06	999.95	3366.5	-116.95	-59.4782	1031.02	0
4.98844e+06	999.62	3370.1	-117.28	-59.5418	1031.99	0
4.98845e+06	999.23	3373.7	-117.67	-59.6054	1032.96	0
4.98845e+06	998.65	3377.5	-118.25	-59.6725	1033.93	0
4.98845e+06	998	3381.2	-118.9	-59.7379	1035.02	0
4.98846e+06	997.33	3384.9	-119.57	-59.8033	1035.99	0
4988462	996.67	3388.6	-120.23	-59.8686	1036.96	0
4.98847e+06	996.32	3392.3	-120.58	-59.934	1037.93	0
4.98847e+06	995.72	3396	-121.18	-59.9994	1039.02	0
4988473	995.72	3399.6	-121.18	-60.063	1039.99	0
4.98848e+06	995.15	3403	-121.75	-60.123	1040.96	0
4.98848e+06	995.93	3406.8	-120.97	-60.1902	1042.05	0
4988484	994	3410.6	-122.9	-60.2573	1043.02	0
4.98849e+06	993.25	3414.2	-123.65	-60.3209	1043.99	0
4.98849e+06	992.64	3417.7	-124.26	-60.3828	1044.96	0
4.98849e+06	992.16	3421.4	-124.74	-60.4481	1046.05	0
4.9885e+06	991.36	3425	-125.54	-60.5117	1047.02	0
4.9885e+06	991.01	3428.5	-125.89	-60.5736	1047.99	0
4.98851e+06	991.18	3432	-125.72	-60.6354	1048.96	0
4.98851e+06	991.45	3435.4	-125.45	-60.6955	1050.05	0
4.98851e+06	991.6	3438.8	-125.3	-60.7555	1051.02	0
4.98852e+06	991.69	3442.2	-125.21	-60.8156	1051.99	0
4.98852e+06	991.9	3445.7	-125	-60.8775	1052.96	0
4.98852e+06	991.79	3449.2	-125.11	-60.9393	1054.05	0
4988526	991.79	3452.6	-125.11	-60.9994	1055.02	0
4.98853e+06	991.65	3456	-125.25	-61.0594	1055.99	0
4.98853e+06	991.46	3459.5	-125.44	-61.1213	1056.96	0
4.98854e+06	991.41	3462.8	-125.49	-61.1796	1058.05	0
4.98854e+06	991.24	3466.2	-125.66	-61.2396	1059.02	0
4988543	991.18	3469.6	-125.72	-61.2997	1059.99	0
4.98855e+06	991.2	3473	-125.7	-61.3598	1060.96	0
4.98855e+06	991.11	3476.4	-125.79	-61.4199	1062.05	0
4.98855e+06	990.96	3479.8	-125.94	-61.4799	1063.02	0
4.98856e+06	990.17	3483.2	-126.73	-61.54	1063.99	0
4.98856e+06	989.82	3486.7	-127.08	-61.6018	1064.96	0
4.98856e+06	989.27	3490	-127.63	-61.6601	1066.05	0
4.98857e+06	988.87	3493.5	-128.03	-61.722	1067.02	0
4.98857e+06	988.44	3496.9	-128.46	-61.782	1067.99	0
4.98857e+06	988.44	3500.2	-128.46	-61.8404	1068.96	0
4988577	988.04	3503.6	-128.86	-61.9004	1070.05	0
4.98858e+06	987.47	3507	-129.43	-61.9605	1071.02	0
4.98858e+06	986.93	3510.4	-129.97	-62.0206	1071.99	0
4.98859e+06	986.46	3513.7	-130.44	-62.0789	1073.07	0
4.98859e+06	986.1	3517	-130.8	-62.1372	1074.05	0
4.98859e+06	985.82	3520.2	-131.08	-62.1937	1075.02	0
4.9886e+06	985.63	3523.5	-131.27	-62.252	1075.99	0
4988600	985.7	3526.6	-131.2	-62.3068	1077.07	0
4.9886e+06	985.61	3529.9	-131.29	-62.3651	1078.05	0
4.98861e+06	985.57	3533.1	-131.33	-62.4216	1079.02	0
4.98861e+06	985.37	3536.3	-131.53	-62.4781	1079.99	0
4.98861e+06	985.15	3539.5	-131.75	-62.5347	1081.07	0
4.98862e+06	985.07	3542.7	-131.83	-62.5912	1082.05	0
4.98862e+06	984.94	3545.9	-131.96	-62.6478	1083.02	0
4.98862e+06	984.94	3549	-131.96	-62.7025	1083.99	0
4.98863e+06	984.74	3552.3	-132.16	-62.7608	1085.07	0
4.98863e+06	984.57	3555.4	-132.33	-62.8156	1086.05	0
4.98863e+06	984.46	3558.5	-132.44	-62.8704	1087.02	0
4988635	984.37	3561.6	-132.53	-62.9251	1087.99	0
4.98864e+06	984.35	3564.7	-132.55	-62.9799	1089.07	0
4.98864e+06	984.48	3567.8	-132.42	-63.0347	1090.05	0
4.98864e+06	984.36	3570.9	-132.54	-63.0894	1091.02	0
4.98865e+06	984.27	3574	-132.63	-63.1442	1091.99	0
4.98865e+06	984.2	3577.1	-132.7	-63.199	1093.07	0
4.98865e+06	984.16	3580.2	-132.74	-63.2538	1094.05	0
4.98866e+06	984.17	3583.2	-132.73	-63.3068	1095.02	0
4.98866e+06	984.21	3586.2	-132.69	-63.3598	1095.99	0
4.98866e+06	984.14	3589.2	-132.76	-63.4128	1097.08	0
4.98867e+06	984.14	3592.3	-132.76	-63.4675	1098.05	0
4.98867e+06	984.22	3595.2	-132.68	-63.5188	1099.02	0
4.98867e+06	984.28	3598.2	-132.62	-63.5718	1099.99	0
4.98867e+06	984.28	3601.2	-132.62	-63.6248	1101.08	0
4.98868e+06	984.32	3604.1	-132.58	-63.676	1102.06	0
4.98868e+06	984.36	3607.1	-132.54	-63.729	1103.03	0
4.98868e+06	984.28	3610.1	-132.62	-63.782	1104	0
4.98869e+06	984.26	3613	-132.64	-63.8333	1105.09	0
4.9887e+06	984.2	3622.2	-132.7	-63.9958	1106.06	0
4988732	1041.1	3658.6	-75.8	-64.6389	1107.03	0
4.98876e+06	1081.9	3691.3	-35	-65.2166	1108	0
4.98871e+06	1013.4	3635	-103.5	-64.222	1109.09	0
4.9887e+06	990.11	3629.2	-126.79	-64.1195	1110.06	0
4.98871e+06	1012.6	3639	-104.3	-64.2926	1111.03	0
4988704	1012.6	3630.6	-104.3	-64.1442	1112	0
4.98871e+06	992.85	3636	-124.05	-64.2396	1113.09	0
4.98871e+06	999.22	3636.7	-117.68	-64.252	1114.06	0
4.98871e+06	990.79	3639.5	-126.11	-64.3015	1115.03	0
4.98872e+06	990.78	3642.4	-126.12	-64.3527	1116.01	0
4.98872e+06	990.75	3645.2	-126.15	-64.4022	1117.09	0
4.98872e+06	990.7	3648	-126.2	-64.4516	1118.06	0
4.98872e+06	990.63	3650.9	-126.27	-64.5029	1119.03	0
4.98873e+06	990.39	3653.7	-126.51	-64.5523	1120	0
4988730	989.73	3656.6	-127.17	-64.6036	1121.09	0
4.98873e+06	990.85	3659.1	-126.05	-64.6477	1122.06	0
4.98874e+06	991.07	3662	-125.83	-64.699	1123.03	0
4.98874e+06	992.32	3664.4	-124.58	-64.7414	1124.12	0
4.98874e+06	992.03	3667.3	-124.87	-64.7926	1125.09	0
4.98874e+06	987.57	3670.9	-129.33	-64.8562	1126.06	0
4.98875e+06	987.57	3673.9	-129.33	-64.9092	1127.03	0
4.98875e+06	985.5	3679.9	-131.4	-65.0152	1128.12	0
4.98875e+06	999.99	3680.8	-116.91	-65.0311	1129.09	0
4.98876e+06	984.95	3682.4	-131.95	-65.0594	1130.06	0
4.98876e+06	984.06	3684.7	-132.84	-65.1	1131.03	0
4.98876e+06	984.82	3687.4	-132.08	-65.1477	1132.12	0
4.98876e+06	983.73	3690.2	-133.17	-65.1972	1133.09	0
4.98877e+06	987.71	3696.5	-129.19	-65.3085	1134.06	0
4988812	1001.4	3738.6	-115.5	-66.0523	1135.03	0
4.98881e+06	1060.2	3736	-56.7	-66.0064	1136.12	0
4988790	1043.6	3716.6	-73.3	-65.6636	1137.09	0
4.98884e+06	1072.4	3771.3	-44.5	-66.63	1138.06	0
4.98878e+06	997.93	3703	-118.97	-65.4233	1139.03	0
4.98878e+06	986.16	3706.2	-130.74	-65.4799	1140.12	0
4.98878e+06	984.06	3708.8	-132.84	-65.5258	1141.09	0
4.98878e+06	984.06	3711	-132.84	-65.5647	1142.06	0
4.98879e+06	983.77	3713	-133.13	-65.6	1143.03	0
4.98879e+06	983.43	3715.2	-133.47	-65.6389	1144.12	0
4.98879e+06	983.13	3717.1	-133.77	-65.6725	1145.09	0
4.98879e+06	983.83	3719.1	-133.07	-65.7078	1146.06	0
4.98879e+06	983.52	3721	-133.38	-65.7414	1147.03	0
4.9888e+06	984.01	3722.9	-132.89	-65.7749	1148.12	0
4.9888e+06	983.56	3724.7	-133.34	-65.8067	1149.09	0
4.9888e+06	983.67	3726.8	-133.23	-65.8438	1150.07	0
4.9888e+06	982.48	3728.9	-134.42	-65.8809	1151.04	0
4.9888e+06	982.12	3730.7	-134.78	-65.9127	1152.12	0
4988806	981.85	3732.6	-135.05	-65.9463	1153.1	0
4.98881e+06	981.87	3734.4	-135.03	-65.9781	1154.07	0
4.98881e+06	981.84	3736.2	-135.06	-66.0099	1155.04	0
4.98881e+06	981.78	3737.9	-135.12	-66.04	1156.12	0
4.98881e+06	981.78	3739.7	-135.12	-66.0717	1157.1	0
4.98881e+06	981.72	3741.5	-135.18	-66.1035	1158.07	0
4.98882e+06	981.57	3743.4	-135.33	-66.1371	1159.04	0
4.98882e+06	981.61	3745.2	-135.29	-66.1689	1160.13	0
4.98882e+06	981.67	3747	-135.23	-66.2007	1161.1	0
4.98882e+06	981.71	3748.8	-135.19	-66.2325	1162.07	0
4.98882e+06	981.69	3750.7	-135.21	-66.2661	1163.04	0
4988826	981.95	3752.6	-134.95	-66.2997	1164.13	0
4988828	981.99	3754.6	-134.91	-66.335	1165.1	0
4.98883e+06	982.41	3756.4	-134.49	-66.3668	1166.07	0
4.98883e+06	983.09	3758.4	-133.81	-66.4021	1167.15	0
4.98883e+06	982.82	3760.5	-134.08	-66.4392	1168.12	0
4988836	982.28	3762.6	-134.62	-66.4763	1169.09	0
4.98884e+06	982	3764.8	-134.9	-66.5152	1170.06	0
4.98884e+06	981.88	3767	-135.02	-66.5541	1171.14	0
4.98884e+06	981.88	3769.1	-135.02	-66.5912	1172.11	0
4.98884e+06	981.83	3771.3	-135.07	-66.63	1173.08	0
4.98885e+06	981.79	3773.5	-135.11	-66.6689	1174.05	0
4.98885e+06	981.81	3775.8	-135.09	-66.7095	1175.14	0
4.98885e+06	981.77	3778.2	-135.13	-66.752	1176.11	0
4988854	981.79	3780.6	-135.11	-66.7944	1177.08	0
4.98886e+06	981.8	3783.2	-135.1	-66.8403	1178.05	0
4.98886e+06	981.79	3785.9	-135.11	-66.888	1179.14	0
4.98886e+06	981.79	3788.5	-135.11	-66.9339	1180.11	0
4.98886e+06	981.87	3791.2	-135.03	-66.9816	1181.09	0
4.98887e+06	981.89	3794	-135.01	-67.0311	1182.06	0
4.98887e+06	982	3796.9	-134.9	-67.0823	1183.14	0
4.98887e+06	982.02	3799.9	-134.88	-67.1353	1184.11	0
4.98888e+06	982.1	3802.9	-134.8	-67.1883	1185.09	0
4.98888e+06	982.32	3805.9	-134.58	-67.2413	1186.17	0
4.98888e+06	982.32	3809.1	-134.58	-67.2979	1187.14	0
4.98889e+06	982.36	3812.4	-134.54	-67.3562	1188.11	0
4988889	982.36	3815.6	-134.54	-67.4127	1189.09	0
4.98889e+06	982.41	3819	-134.49	-67.4728	1190.17	0
4.9889e+06	982.39	3822.5	-134.51	-67.5346	1191.14	0
4.9889e+06	982.47	3826	-134.43	-67.5965	1192.11	0
4988903	982.46	3829.6	-134.44	-67.6601	1193.09	0
4.98891e+06	982.52	3833.2	-134.38	-67.7237	1194.17	0
4.98891e+06	982.5	3836.9	-134.4	-67.7891	1195.14	0
4988914	982.62	3840.6	-134.28	-67.8544	1196.11	0
4.98892e+06	982.61	3844.5	-134.29	-67.9233	1197.09	0
4.98892e+06	982.69	3848.4	-134.21	-67.9922	1198.17	0
4.98893e+06	982.69	3852.2	-134.21	-68.0594	1199.14	0
4.98893e+06	982.74	3856.2	-134.16	-68.13	1200.11	0
4.98893e+06	982.74	3860.2	-134.16	-68.2007	1201.09	0
4.98894e+06	982.87	3864.2	-134.03	-68.2714	1202.18	0
4.98894e+06	982.95	3868.4	-133.95	-68.3456	1203.15	0
4988946	983.01	3872.6	-133.89	-68.4198	1204.12	0
4.98895e+06	983.15	3876.7	-133.75	-68.4922	1205.09	0
4.98895e+06	983.38	3880.9	-133.52	-68.5664	1206.18	0
4.98896e+06	983.52	3885.2	-133.38	-68.6424	1207.15	0
4.98896e+06	983.61	3889.5	-133.29	-68.7184	1208.13	0
4.98897e+06	984.11	3893.8	-132.79	-68.7943	1209.1	0
4.98897e+06	984	3898.3	-132.9	-68.8738	1210.18	0
4.98898e+06	983.9	3902.8	-133	-68.9534	1211.15	0
4.98898e+06	983.92	3907.4	-132.98	-69.0346	1212.13	0
4.98899e+06	983.99	3911.8	-132.91	-69.1124	1213.1	0
4.98899e+06	984.05	3916.5	-132.85	-69.1954	1214.18	0
4.98899e+06	984.2	3921	-132.7	-69.2749	1215.15	0
4988999	984.2	3925.6	-132.7	-69.3562	1216.13	0
4.989e+06	984.29	3930.3	-132.61	-69.4392	1217.1	0
4.98901e+06	984.37	3934.9	-132.53	-69.5205	1218.18	0
4989013	984.56	3939.6	-132.34	-69.6035	1219.15	0
4.98902e+06	984.64	3944.4	-132.26	-69.6883	1220.13	0
4.98902e+06	984.65	3949.2	-132.25	-69.7731	1221.1	0
4.98903e+06	984.53	3954	-132.37	-69.8579	1222.18	0
4.98903e+06	984.59	3958.9	-132.31	-69.9445	1223.15	0
4.98904e+06	984.48	3963.7	-132.42	-70.0293	1224.13	0
4989042	984.46	3968.6	-132.44	-70.1159	1225.1	0
4.98905e+06	984.57	3973.5	-132.33	-70.2024	1226.18	0
4.98905e+06	984.61	3978.5	-132.29	-70.2908	1227.15	0
4.98906e+06	984.7	3983.4	-132.2	-70.3774	1228.13	0
4.98906e+06	984.71	3988.4	-132.19	-70.4657	1229.1	0
4.98907e+06	984.84	3993.4	-132.06	-70.554	1230.18	0
4.98907e+06	984.84	3998.3	-132.06	-70.6406	1231.15	0
4.98908e+06	985.08	4003.3	-131.82	-70.7289	1232.13	0
4.98908e+06	985.5	4008.2	-131.4	-70.8155	1233.21	0
4.98909e+06	985.43	4013.3	-131.47	-70.9056	1234.18	0
4.98909e+06	985.72	4018.4	-131.18	-70.9957	1235.15	0
4.9891e+06	985.53	4023.4	-131.37	-71.0841	1236.13	0
4.9891e+06	985.65	4028.5	-131.25	-71.1742	1237.21	0
4989107	985.61	4033.6	-131.29	-71.2643	1238.18	0
4989112	986.24	4038.6	-130.66	-71.3526	1239.15	0
4.98912e+06	986.62	4043.7	-130.28	-71.4427	1240.13	0
4.98912e+06	986.8	4048.9	-130.1	-71.5346	1241.21	0
4.98913e+06	986.63	4054.2	-130.27	-71.6282	1242.18	0
4.98913e+06	986.13	4059.5	-130.77	-71.7219	1243.15	0
4.98914e+06	986.13	4064.7	-130.77	-71.8137	1244.13	0
4.98914e+06	985.8	4070	-131.1	-71.9074	1245.21	0
4.98915e+06	985.8	4075.4	-131.1	-72.0028	1246.18	0
4989154	985.83	4080.6	-131.07	-72.0947	1247.15	0
4.98916e+06	986	4085.7	-130.9	-72.1848	1248.13	0
4.98916e+06	986.27	4091.1	-130.63	-72.2802	1249.21	0
4.98917e+06	986.19	4096.5	-130.71	-72.3756	1250.18	0
4989175	986.32	4101.6	-130.58	-72.4657	1251.15	0
4989182	992.99	4108.6	-123.91	-72.5893	1252.13	0
4.98919e+06	992.34	4112.2	-124.56	-72.653	1253.21	0
4.98919e+06	990.89	4117	-126.01	-72.7378	1254.18	0
4989196	988.55	4122.6	-128.35	-72.8367	1255.15	0
4.9892e+06	988.61	4128	-128.29	-72.9321	1256.13	0
4.98921e+06	987.95	4133.5	-128.95	-73.0293	1257.21	0
4.98921e+06	987.78	4138.9	-129.12	-73.1247	1258.18	0
4.98922e+06	987.78	4144.3	-129.12	-73.2201	1259.15	0
4989223	987.72	4149.6	-129.18	-73.3137	1260.13	0
4.98923e+06	987.74	4155	-129.16	-73.4091	1261.22	0
4.98923e+06	987.86	4160.5	-129.04	-73.5063	1262.19	0
4.98924e+06	987.72	4165.9	-129.18	-73.6017	1263.16	0
4.98924e+06	987.7	4171.3	-129.2	-73.6971	1264.14	0
4.98925e+06	988.79	4176.4	-128.11	-73.7872	1265.22	0
4.98926e+06	988.51	4182.1	-128.39	-73.8879	1266.2	0
4.98926e+06	987.57	4187.7	-129.33	-73.9869	1267.17	0
4.98927e+06	987.17	4193	-129.73	-74.0805	1268.14	0
4989272	987.13	4198.6	-129.77	-74.1794	1269.22	0
4.98928e+06	987.14	4204	-129.76	-74.2749	1270.2	0
4.98928e+06	987.16	4209.5	-129.74	-74.372	1271.17	0
4.98929e+06	987.28	4214.8	-129.62	-74.4657	1272.14	0
4.98929e+06	987.31	4220.2	-129.59	-74.5611	1273.22	0
4.9893e+06	987.31	4225.7	-129.59	-74.6582	1274.2	0
4.9893e+06	987.47	4231.2	-129.43	-74.7554	1275.17	0
4989310	987.23	4236.6	-129.67	-74.8508	1276.14	0
4.98932e+06	987.18	4242	-129.72	-74.9462	1277.22	0
4.98932e+06	987.26	4247.4	-129.64	-75.0416	1278.2	0
4.98933e+06	987.39	4252.8	-129.51	-75.137	1279.17	0
4.98933e+06	987.42	4258.2	-129.48	-75.2324	1280.26	0
4.98934e+06	987.4	4263.7	-129.5	-75.3296	1281.23	0
4.98934e+06	987.41	4269.2	-129.49	-75.4268	1282.2	0
4.98935e+06	987.48	4274.5	-129.42	-75.5204	1283.17	0
4.98935e+06	987.48	4279.9	-129.42	-75.6158	1284.26	0
4.98936e+06	987.54	4285.4	-129.36	-75.713	1285.23	0
4.98936e+06	987.59	4290.7	-129.31	-75.8066	1286.21	0
4.98937e+06	987.84	4296.2	-129.06	-75.9038	1287.18	0
4989375	987.84	4301.6	-129.06	-75.9992	1288.15	0
4.98938e+06	987.86	4306.9	-129.04	-76.0928	1289.24	0
4.98939e+06	987.91	4312.4	-128.99	-76.19	1290.21	0
4.98939e+06	987.98	4317.7	-128.92	-76.2837	1291.18	0
4.9894e+06	988.44	4323.2	-128.46	-76.3808	1292.27	0
4989402	988.35	4328.6	-128.55	-76.4762	1293.24	0
4.98941e+06	988.3	4334	-128.6	-76.5716	1294.21	0
4.98941e+06	988.3	4339.4	-128.6	-76.6671	1295.18	0
4.98942e+06	988.34	4344.7	-128.56	-76.7607	1296.27	0
4.98942e+06	988.4	4350.2	-128.5	-76.8579	1297.24	0
4989429	988.42	4355.6	-128.48	-76.9533	1298.21	0
4.98943e+06	988.4	4360.9	-128.5	-77.0469	1299.18	0
4.98944e+06	988.59	4366.4	-128.31	-77.1441	1300.27	0
4.98945e+06	988.61	4371.7	-128.29	-77.2377	1301.24	0
4.98945e+06	988.63	4377.1	-128.27	-77.3331	1302.22	0
4.98946e+06	988.63	4382.5	-128.27	-77.4285	1303.19	0
4.98946e+06	988.63	4387.9	-128.27	-77.5239	1304.28	0
4.98947e+06	988.76	4393.2	-128.14	-77.6176	1305.25	0
4989472	988.87	4398.6	-128.03	-77.713	1306.22	0
4.98948e+06	988.82	4403.9	-128.08	-77.8066	1307.19	0
4.98948e+06	988.87	4409.3	-128.03	-77.902	1308.28	0
4989488	989.35	4414.6	-127.55	-77.9957	1309.25	0
4.98949e+06	989.25	4420	-127.65	-78.0911	1310.22	0
4.9895e+06	989.2	4425.4	-127.7	-78.1865	1311.2	0
4989504	989.23	4430.6	-127.67	-78.2783	1312.29	0
4.98951e+06	989.26	4436	-127.64	-78.3737	1313.26	0
4.98951e+06	989.24	4441.4	-127.66	-78.4691	1314.23	0
4.98952e+06	989.23	4446.7	-127.67	-78.5628	1315.2	0
4.98953e+06	989.25	4452.1	-127.65	-78.6582	1316.28	0
4.98953e+06	989.3	4457.4	-127.6	-78.7518	1317.25	0
4.98954e+06	989.3	4462.7	-127.6	-78.8455	1318.22	0
4.98954e+06	989.36	4468	-127.54	-78.9391	1319.19	0
4.98955e+06	989.42	4473.4	-127.48	-79.0345	1320.28	0
4989552	989.54	4478.6	-127.36	-79.1264	1321.25	0
4.98956e+06	989.6	4484	-127.3	-79.2218	1322.22	0
4.98956e+06	989.64	4489.4	-127.26	-79.3172	1323.18	0
4989568	989.68	4494.6	-127.22	-79.4091	1324.27	0
4.98957e+06	989.82	4499.9	-127.08	-79.5027	1325.23	0
4.98958e+06	989.77	4505.2	-127.13	-79.5964	1326.21	0
4.98958e+06	989.79	4510.5	-127.11	-79.69	1327.3	0
4.98959e+06	989.86	4515.7	-127.04	-79.7819	1328.27	0
4.98959e+06	989.93	4521	-126.97	-79.8755	1329.24	0
4.9896e+06	990.02	4526.2	-126.88	-79.9674	1330.21	0
4.9896e+06	990.06	4531.4	-126.84	-80.0592	1331.3	0
4.98961e+06	990.06	4536.7	-126.84	-80.1529	1332.27	0
4.98962e+06	990.06	4541.9	-126.84	-80.2447	1333.24	0
4.98962e+06	990.09	4547	-126.81	-80.3349	1334.21	0
4.98963e+06	990.16	4552.3	-126.74	-80.4285	1335.3	0
4.98963e+06	990.26	4557.5	-126.64	-80.5204	1336.27	0
4989636	990.42	4562.6	-126.48	-80.6105	1337.24	0
4.98964e+06	991.12	4567.5	-125.78	-80.697	1338.21	0
4.98965e+06	991.44	4572.7	-125.46	-80.7889	1339.3	0
4.98965e+06	991.36	4578	-125.54	-80.8825	1340.27	0
4.98966e+06	992.29	4582.1	-124.61	-80.955	1341.24	0
4989650	991.91	4576.6	-124.99	-80.8578	1342.21	0
4.98956e+06	990.1	4490.7	-126.8	-79.3402	1343.3	0
4.98915e+06	1067.2	4075.9	-49.7	-72.0116	1344.27	0
4.98878e+06	1198.1	3709.4	81.2	-65.5364	1345.24	0
4.98852e+06	1317	3443.8	200.1	-60.8439	1346.21	0
4.98838e+06	1391.9	3310.3	275	-58.4853	1347.3	0
4.98832e+06	1391.9	3243.2	275	-57.2998	1348.27	0
4988236	1550.1	3162.6	433.2	-55.8757	1349.24	0
4.98821e+06	1505	3141.4	388.1	-55.5012	1350.21	0
4988201	1514.4	3127.6	397.5	-55.2574	1351.3	0
4.98819e+06	1532.7	3121.1	415.8	-55.1425	1352.27	0
4.98819e+06	1545.6	3118.5	428.7	-55.0966	1353.24	0
4.98819e+06	1559.7	3119	442.8	-55.1054	1354.32	0
4.98819e+06	1572.9	3121.2	456	-55.1443	1355.29	0
4.9882e+06	1583.9	3125.5	467	-55.2203	1356.26	0
4.9882e+06	1594.2	3130	477.3	-55.2998	1357.23	0
4.98821e+06	1604.8	3135.4	487.9	-55.3952	1358.32	0
4.98821e+06	1613.4	3141.2	496.5	-55.4977	1359.29	0
4.98822e+06	1621.4	3147.2	504.5	-55.6037	1360.26	0
4.98823e+06	1628.5	3154	511.6	-55.7238	1361.23	0
4.98823e+06	1635.8	3160.5	518.9	-55.8386	1362.32	0
4.98824e+06	1635.8	3166.9	518.9	-55.9517	1363.29	0
4.98825e+06	1642.4	3174	525.5	-56.0772	1364.26	0
4.98825e+06	1648.1	3180.2	531.2	-56.1867	1365.23	0
3.44451e+06	1654.8	-1540564	537.9	27218.2	1366.32	0
947173	3402.6	-4037900	2285.7	71340.3	1367.29	0
944740	4622.9	-4040333	3506	71383.2	1368.27	0
943824	4623.1	-4041249	3506.2	71399.4	1369.23	0
940969	4624.1	-4044104	3507.2	71449.9	1370.32	0
940332	4624.9	-4044741	3508	71461.1	1371.29	0
940787	4624.8	-4044287	3507.9	71453.1	1372.26	0
938008	4624.3	-4047065	3507.4	71502.2	1373.23	0
935271	4624.3	-4049802	3507.4	71550.5	1374.32	0
945270	4622.1	-4039803	3505.2	71373.9	1375.29	0
946356	4618.6	-4038717	3501.7	71354.7	1376.26	0
942376	4622.9	-4042697	3506	71425	1377.34	0
942588	4622.9	-4042486	3506	71421.3	1378.31	0
942692	4623.3	-4042381	3506.4	71419.4	1379.28	0
948927	4623.9	-4036146	3507	71309.3	1380.25	0
944823	4623.9	-4040250	3507	71381.8	1381.34	0
940984	4623.4	-4044090	3506.5	71449.6	1382.31	0
943928	4623.8	-4041145	3506.9	71397.6	1383.28	0
941612	4624.3	-4043461	3507.4	71438.5	1384.25	0
942721	4622.8	-4042353	3505.9	71418.9	1385.33	0
940540	4624.1	-4044534	3507.2	71457.4	1386.3	0
942008	4623.6	-4043066	3506.7	71431.5	1387.27	0
941369	4623.7	-4043704	3506.8	71442.8	1388.25	0
938636	4623.7	-4046437	3506.8	71491.1	1389.33	0
941160	4623.4	-4043914	3506.5	71446.5	1390.3	0
941257	4623.4	-4043816	3506.5	71444.8	1391.28	0
940816	4623.4	-4044257	3506.5	71452.6	1392.25	0
942390	4623.6	-4042683	3506.7	71424.8	1393.33	0
940768	4623.9	-4044305	3507	71453.4	1394.31	0
943192	4624.3	-4041882	3507.4	71410.6	1395.28	0
943308	4621	-4041765	3504.1	71408.5	1396.25	0
957216	4623.2	-4027857	3506.3	71162.8	1397.33	0
977115	4623	-4007958	3506.1	70811.2	1398.3	0
959212	4623	-4025861	3506.1	71127.6	1399.28	0
942259	4623.9	-4042814	3507	71427.1	1400.36	0
941239	4623.9	-4043834	3507	71445.1	1401.34	0
943038	4624.3	-4042035	3507.4	71413.3	1402.31	0
939810	4625.2	-4045264	3508.3	71470.4	1403.28	0
942055	4624	-4043018	3507.1	71430.7	1404.36	0
945768	4623.7	-4039305	3506.8	71365.1	1405.33	0
944825	4623.7	-4040248	3506.8	71381.7	1406.3	0
944470	4623.2	-4040603	3506.3	71388	1407.28	0
944439	4623.3	-4040635	3506.4	71388.6	1408.36	0
944727	4622.9	-4040346	3506	71383.5	1409.33	0
944211	4622.4	-4040862	3505.5	71392.6	1410.3	0
944523	4622.5	-4040550	3505.6	71387.1	1411.28	0
944040	4622.6	-4041033	3505.7	71395.6	1412.36	0
943752	4622.6	-4041321	3505.7	71400.7	1413.33	0
945942	4622.8	-4039131	3505.9	71362	1414.3	0
946296	4622.7	-4038777	3505.8	71355.8	1415.27	0
945582	4622.7	-4039492	3505.8	71368.4	1416.35	0
942738	4623.2	-4042336	3506.3	71418.6	1417.32	0
948673	4624.2	-4036400	3507.3	71313.8	1418.29	0
974670	4624.3	-4010403	3507.4	70854.4	1419.37	0
949942	4624.2	-4035131	3507.3	71291.3	1420.35	0
951947	4624.2	-4033126	3507.3	71255.9	1421.32	0
949869	4622.9	-4035204	3506	71292.6	1422.29	0
947885	4624.4	-4037189	3507.5	71327.7	1423.37	0
964743	4623.4	-4020330	3506.5	71029.8	1424.34	0
969684	4623.5	-4015389	3506.6	70942.5	1425.32	0
974357	4623.1	-4010716	3506.2	70860	1426.29	0
965906	4622.2	-4019167	3505.3	71009.3	1427.37	0
964984	4623.3	-4020089	3506.4	71025.6	1428.34	0
964646	4623.2	-4020427	3506.3	71031.6	1429.31	0
965742	4623.3	-4019331	3506.4	71012.2	1430.28	0
971408	4622.6	-4013665	3505.7	70912.1	1431.36	0
979338	4622.8	-4005736	3505.9	70772	1432.33	0
983658	4622.3	-4001415	3505.4	70695.6	1433.3	0
973920	4623	-4011153	3506.1	70867.7	1434.28	0
969176	4623.5	-4015898	3506.6	70951.5	1435.36	0
955645	4623.5	-4029428	3506.6	71190.6	1436.33	0
947408	4623.7	-4037665	3506.8	71336.1	1437.3	0
948728	4624.3	-4036346	3507.4	71312.8	1438.38	0
948472	4623.7	-4036601	3506.8	71317.3	1439.35	0
949666	4623.7	-4035407	3506.8	71296.2	1440.32	0
951231	4623.6	-4033842	3506.7	71268.6	1441.29	0
954402	4623	-4030672	3506.1	71212.5	1442.37	0
954399	4623	-4030675	3506.1	71212.6	1443.35	0
955977	4623.3	-4029096	3506.4	71184.7	1444.32	0
963255	4623	-4021818	3506.1	71056.1	1445.29	0
968143	4622.7	-4016930	3505.8	70969.8	1446.37	0
972456	4623.1	-4012617	3506.2	70893.6	1447.35	0
972814	4623.1	-4012259	3506.2	70887.2	1448.32	0
972079	4623	-4012995	3506.1	70900.2	1449.4	0
964696	4623.2	-4020377	3506.3	71030.7	1450.37	0
962382	4623.2	-4022691	3506.3	71071.6	1451.34	0
957025	4623.2	-4028049	3506.3	71166.2	1452.31	0
955568	4623.3	-4029505	3506.4	71191.9	1453.39	0
956010	4623.3	-4029063	3506.4	71184.1	1454.36	0
955022	4623.4	-4030051	3506.5	71201.6	1455.33	0
954162	4623.8	-4030911	3506.9	71216.8	1456.31	0
958294	4623.6	-4026779	3506.7	71143.8	1457.39	0
960509	4623.4	-4024564	3506.5	71104.6	1458.36	0
955427	4623.3	-4029646	3506.4	71194.4	1459.33	0
956243	4623.7	-4028830	3506.8	71180	1460.3	0
960724	4623.8	-4024349	3506.9	71100.8	1461.39	0
971919	4623	-4013155	3506.1	70903.1	1462.36	0
968697	4623.4	-4016377	3506.5	70960	1463.33	0
963512	4624	-4021562	3507.1	71051.6	1464.41	0
959080	4624	-4025993	3507.1	71129.9	1465.38	0
951970	4622.8	-4033103	3505.9	71255.5	1466.35	0
954120	4622.7	-4030953	3505.8	71217.5	1467.32	0
955326	4622.9	-4029747	3506	71196.2	1468.4	0
956513	4623	-4028560	3506.1	71175.2	1469.37	0
954231	4623.3	-4030842	3506.4	71215.6	1470.34	0
951635	4623.1	-4033439	3506.2	71261.4	1471.32	0
953065	4623.2	-4032008	3506.3	71236.2	1472.4	0
953800	4623.1	-4031273	3506.2	71223.2	1473.37	0
951813	4623.6	-4033261	3506.7	71258.3	1474.34	0
956486	4623.7	-4028588	3506.8	71175.7	1475.42	0
955657	4623	-4029417	3506.1	71190.4	1476.39	0
952624	4622.8	-4032449	3505.9	71243.9	1477.36	0
947703	4623.9	-4037370	3507	71330.9	1478.33	0
939345	4623.8	-4045728	3506.9	71478.6	1479.42	0
943468	4623.8	-4041605	3506.9	71405.7	1480.39	0
942445	4622.6	-4042628	3505.7	71423.8	1481.36	0
944063	4622.7	-4041011	3505.8	71395.2	1482.33	0
943804	4622.8	-4041269	3505.9	71399.8	1483.41	0
942578	4622.9	-4042495	3506	71421.4	1484.38	0
943757	4622.8	-4041316	3505.9	71400.6	1485.35	0
944210	4622.6	-4040863	3505.7	71392.6	1486.43	0
945948	4622.8	-4039125	3505.9	71361.9	1487.4	0
946761	4622.7	-4038312	3505.8	71347.5	1488.37	0
944878	4623.3	-4040195	3506.4	71380.8	1489.34	0
945613	4623.6	-4039460	3506.7	71367.8	1490.42	0
943438	4623.5	-4041635	3506.6	71406.2	1491.39	0
943363	4623.4	-4041710	3506.5	71407.6	1492.36	0
943946	4623.3	-4041128	3506.4	71397.3	1493.34	0
942901	4623.3	-4042172	3506.4	71415.7	1494.42	0
940846	4623.3	-4044227	3506.4	71452	1495.39	0
943846	4623.5	-4041227	3506.6	71399	1496.36	0
946829	4626.1	-4038245	3509.2	71346.3	1497.34	0
949049	4625	-4036024	3508.1	71307.1	1498.42	0
948053	4623.9	-4037020	3507	71324.7	1499.39	0
946085	4623.7	-4038988	3506.8	71359.5	1500.36	0
948876	4624	-4036197	3507.1	71310.2	1501.34	0
947188	4624.7	-4037886	3507.8	71340	1502.42	0
945897	4625.1	-4039176	3508.2	71362.8	1503.39	0
954542	4625.8	-4030532	3508.9	71210.1	1504.36	0
947861	4625.3	-4037212	3508.4	71328.1	1505.44	0
943123	4623.1	-4041950	3506.2	71411.8	1506.42	0
944394	4624.8	-4040679	3507.9	71389.4	1507.39	0
946443	4624.8	-4038630	3507.9	71353.1	1508.36	0
944015	4626	-4041058	3509.1	71396.1	1509.44	0
942326	4626	-4042747	3509.1	71425.9	1510.41	0
941452	4626	-4043621	3509.1	71441.3	1511.39	0
943293	4625.3	-4041780	3508.4	71408.8	1512.36	0
944447	4623.8	-4040626	3506.9	71388.4	1513.44	0
944153	4623.4	-4040920	3506.5	71393.6	1514.41	0
944883	4623.1	-4040191	3506.2	71380.7	1515.38	0
943518	4622.8	-4041556	3505.9	71404.8	1516.35	0
944923	4622.7	-4040150	3505.8	71380	1517.43	0
944480	4621.5	-4040593	3504.6	71387.8	1518.4	0
943899	4621.2	-4041174	3504.3	71398.1	1519.37	0
945033	4622.2	-4040040	3505.3	71378.1	1520.46	0
943871	4623.3	-4041202	3506.4	71398.6	1521.43	0
946545	4623.9	-4038528	3507	71351.4	1522.4	0
942739	4623.9	-4042334	3507	71418.6	1523.37	0
943797	4623.6	-4041276	3506.7	71399.9	1524.46	0
943401	4623.6	-4041672	3506.7	71406.9	1525.43	0
943068	4623.6	-4042005	3506.7	71412.8	1526.4	0
942053	4623.3	-4043021	3506.4	71430.7	1527.37	0
943525	4623.4	-4041548	3506.5	71404.7	1528.46	0
942829	4623.3	-4042244	3506.4	71417	1529.43	0
942969	4623.4	-4042104	3506.5	71414.5	1530.4	0
941882	4623.4	-4043192	3506.5	71433.7	1531.37	0
941522	4623.4	-4043551	3506.5	71440.1	1532.45	0
942690	4623.5	-4042384	3506.6	71419.5	1533.42	0
941315	4623.4	-4043758	3506.5	71443.8	1534.39	0
942384	4623.4	-4042689	3506.5	71424.9	1535.47	0
943274	4623.4	-4041799	3506.5	71409.1	1536.44	0
944030	4623.4	-4041043	3506.5	71395.8	1537.41	0
941676	4623.4	-4043397	3506.5	71437.4	1538.38	0
943404	4623.4	-4041669	3506.5	71406.8	1539.47	0
941634	4623.4	-4043439	3506.5	71438.1	1540.44	0
943958	4623.5	-4041116	3506.6	71397.1	1541.41	0
942424	4623.4	-4042649	3506.5	71424.2	1542.38	0
942764	4623.4	-4042309	3506.5	71418.1	1543.46	0
941525	4623.3	-4043548	3506.4	71440	1544.43	0
942530	4623.3	-4042543	3506.4	71422.3	1545.4	0
942393	4623.4	-4042680	3506.5	71424.7	1546.38	0
942685	4623.4	-4042389	3506.5	71419.6	1547.46	0
940653	4623.3	-4044421	3506.4	71455.5	1548.43	0
943755	4623.3	-4041318	3506.4	71400.6	1549.4	0
942625	4623.3	-4042449	3506.4	71420.6	1550.48	0
942187	4623.3	-4042886	3506.4	71428.3	1551.45	0
941772	4623.4	-4043301	3506.5	71435.7	1552.42	0
942069	4623.4	-4043004	3506.5	71430.4	1553.39	0
940194	4623.3	-4044879	3506.4	71463.6	1554.47	0
941696	4623.3	-4043377	3506.4	71437	1555.44	0
943693	4623.4	-4041381	3506.5	71401.7	1556.41	0
941742	4623.4	-4043331	3506.5	71436.2	1557.38	0
942917	4623.3	-4042156	3506.4	71415.4	1558.47	0
942352	4623.3	-4042721	3506.4	71425.4	1559.44	0
941675	4623.4	-4043398	3506.5	71437.4	1560.41	0
941866	4623.5	-4043207	3506.6	71434	1561.5	0
942739	4623.5	-4042334	3506.6	71418.6	1562.47	0
940503	4623.3	-4044570	3506.4	71458.1	1563.44	0
942763	4623.3	-4042310	3506.4	71418.2	1564.41	0
941374	4623.3	-4043700	3506.4	71442.7	1565.5	0
941495	4623.4	-4043578	3506.5	71440.6	1566.47	0
941633	4623.4	-4043440	3506.5	71438.1	1567.44	0
940892	4623.4	-4044182	3506.5	71451.2	1568.41	0
942745	4623.4	-4042328	3506.5	71418.5	1569.5	0
940845	4623.4	-4044228	3506.5	71452.1	1570.46	0
941855	4623.4	-4043218	3506.5	71434.2	1571.43	0
941129	4623.4	-4043944	3506.5	71447	1572.4	0
941876	4623.4	-4043197	3506.5	71433.8	1573.48	0
941208	4623.4	-4043865	3506.5	71445.6	1574.45	0
941207	4623.4	-4043866	3506.5	71445.6	1575.42	0
941892	4623.4	-4043181	3506.5	71433.6	1576.51	0
942055	4623.4	-4043018	3506.5	71430.7	1577.47	0
941977	4623.4	-4043096	3506.5	71432.1	1578.44	0
939742	4623.3	-4045331	3506.4	71471.5	1579.41	0
940182	4623.4	-4044892	3506.5	71463.8	1580.5	0
941097	4623.4	-4043976	3506.5	71447.6	1581.47	0
941206	4623.4	-4043868	3506.5	71445.7	1582.44	0
942004	4623.4	-4043069	3506.5	71431.6	1583.41	0
942028	4623.4	-4043046	3506.5	71431.2	1584.5	0
942411	4623.4	-4042662	3506.5	71424.4	1585.47	0
943689	4623.3	-4041384	3506.4	71401.8	1586.44	0
944749	4623.3	-4040324	3506.4	71383.1	1587.41	0
943061	4623.3	-4042012	3506.4	71412.9	1588.5	0
942232	4623.3	-4042842	3506.4	71427.6	1589.47	0
941606	4623.3	-4043467	3506.4	71438.6	1590.44	0
941867	4623.3	-4043206	3506.4	71434	1591.41	0
942812	4623.3	-4042262	3506.4	71417.3	1592.5	0
942613	4623.3	-4042460	3506.4	71420.8	1593.47	0
943781	4623.3	-4041292	3506.4	71400.2	1594.44	0
943628	4623.2	-4041445	3506.3	71402.9	1595.41	0
942028	4623.3	-4043045	3506.4	71431.1	1596.5	0
941948	4623.3	-4043125	3506.4	71432.6	1597.47	0
941272	4623.4	-4043801	3506.5	71444.5	1598.44	0
942634	4623.3	-4042439	3506.4	71420.4	1599.53	0
942771	4623.3	-4042302	3506.4	71418	1600.5	0
942056	4623.3	-4043018	3506.4	71430.7	1601.47	0
943400	4623.3	-4041673	3506.4	71406.9	1602.44	0
942321	4623.3	-4042752	3506.4	71426	1603.53	0
942761	4623.3	-4042312	3506.4	71418.2	1604.5	0
941116	4623.4	-4043957	3506.5	71447.3	1605.47	0
942739	4623.3	-4042334	3506.4	71418.6	1606.44	0
941564	4623.3	-4043509	3506.4	71439.4	1607.53	0
940807	4623.3	-4044266	3506.4	71452.7	1608.5	0
943081	4623.4	-4041992	3506.5	71412.6	1609.47	0
941627	4623.4	-4043446	3506.5	71438.2	1610.44	0
942655	4623.3	-4042418	3506.4	71420.1	1611.53	0
942361	4623.3	-4042712	3506.4	71425.3	1612.5	0
942392	4623.3	-4042681	3506.4	71424.7	1613.47	0
942458	4623.3	-4042615	3506.4	71423.6	1614.43	0
941959	4623.3	-4043114	3506.4	71432.4	1615.52	0
942443	4623.3	-4042630	3506.4	71423.8	1616.48	0
942556	4623.4	-4042517	3506.5	71421.8	1617.45	0
943113	4623.5	-4041960	3506.6	71412	1618.54	0
941188	4623.3	-4043885	3506.4	71446	1619.51	0
942129	4623.4	-4042944	3506.5	71429.4	1620.48	0
944127	4623.4	-4040947	3506.5	71394.1	1621.45	0
942802	4623.4	-4042271	3506.5	71417.5	1622.54	0
942927	4623.3	-4042146	3506.4	71415.3	1623.51	0
942268	4623.4	-4042805	3506.5	71426.9	1624.48	0
942342	4623.3	-4042731	3506.4	71425.6	1625.45	0
941247	4623.3	-4043826	3506.4	71444.9	1626.54	0
941670	4623.3	-4043403	3506.4	71437.5	1627.51	0
941100	4623.4	-4043973	3506.5	71447.5	1628.48	0
940593	4623.5	-4044480	3506.6	71456.5	1629.45	0
941372	4623.4	-4043701	3506.5	71442.8	1630.54	0
942608	4623.4	-4042465	3506.5	71420.9	1631.51	0
941554	4623.5	-4043519	3506.6	71439.5	1632.48	0
940386	4623.5	-4044687	3506.6	71460.2	1633.45	0
942383	4623.5	-4042690	3506.6	71424.9	1634.54	0
941441	4623.4	-4043632	3506.5	71441.5	1635.52	0
942098	4623.5	-4042975	3506.6	71429.9	1636.48	0
942441	4623.4	-4042632	3506.5	71423.9	1637.45	0
943396	4623.4	-4041677	3506.5	71407	1638.54	0
940685	4623.4	-4044388	3506.5	71454.9	1639.51	0
942356	4623.4	-4042717	3506.5	71425.4	1640.48	0
941212	4623.5	-4043861	3506.6	71445.6	1641.56	0
941546	4623.5	-4043527	3506.6	71439.7	1642.53	0
941666	4623.5	-4043407	3506.6	71437.5	1643.5	0
940882	4623.5	-4044191	3506.6	71451.4	1644.46	0
943544	4623.4	-4041529	3506.5	71404.4	1645.55	0
941029	4623.5	-4044044	3506.6	71448.8	1646.52	0
941123	4623.5	-4043950	3506.6	71447.1	1647.48	0
941303	4623.5	-4043771	3506.6	71444	1648.45	0
940870	4623.4	-4044203	3506.5	71451.6	1649.54	0
942279	4623.4	-4042794	3506.5	71426.7	1650.51	0
942183	4623.4	-4042890	3506.5	71428.4	1651.48	0
940868	4623.5	-4044205	3506.6	71451.6	1652.57	0
942721	4623.4	-4042352	3506.5	71418.9	1653.54	0
941343	4623.6	-4043730	3506.7	71443.3	1654.51	0
940498	4623.6	-4044576	3506.7	71458.2	1655.47	0
940547	4623.5	-4044526	3506.6	71457.3	1656.56	0
941818	4623.6	-4043256	3506.7	71434.9	1657.53	0
942532	4623.6	-4042542	3506.7	71422.2	1658.49	0
942247	4623.5	-4042826	3506.6	71427.3	1659.47	0
941915	4623.6	-4043158	3506.7	71433.1	1660.55	0
941253	4623.6	-4043821	3506.7	71444.9	1661.52	0
942446	4623.6	-4042627	3506.7	71423.8	1662.49	0
941375	4623.5	-4043699	3506.6	71442.7	1663.58	0
940268	4623.4	-4044806	3506.5	71462.2	1664.55	0
942316	4623.4	-4042757	3506.5	71426.1	1665.53	0
944408	4623.4	-4040665	3506.5	71389.1	1666.49	0
942437	4623.4	-4042636	3506.5	71423.9	1667.58	0
943238	4623.5	-4041835	3506.6	71409.8	1668.55	0
943928	4623.5	-4041146	3506.6	71397.6	1669.53	0
942653	4623.5	-4042420	3506.6	71420.1	1670.49	0
943376	4623.4	-4041697	3506.5	71407.3	1671.58	0
944978	4623.4	-4040095	3506.5	71379	1672.55	0
942195	4623.4	-4042878	3506.5	71428.2	1673.52	0
942850	4623.5	-4042223	3506.6	71416.6	1674.49	0
942029	4623.5	-4043044	3506.6	71431.1	1675.58	0
943476	4623.5	-4041597	3506.6	71405.6	1676.55	0
944340	4623.3	-4040733	3506.4	71390.3	1677.53	0
943998	4623.4	-4041075	3506.5	71396.4	1678.5	0
942354	4623.4	-4042720	3506.5	71425.4	1679.58	0
942376	4623.5	-4042697	3506.6	71425	1680.56	0
942965	4623.4	-4042108	3506.5	71414.6	1681.53	0
944025	4623.4	-4041048	3506.5	71395.9	1682.49	0
944231	4623.4	-4040842	3506.5	71392.2	1683.58	0
942602	4623.4	-4042471	3506.5	71421	1684.55	0
944671	4623.4	-4040402	3506.5	71384.5	1685.53	0
943982	4623.4	-4041091	3506.5	71396.6	1686.49	0
944954	4623.4	-4040119	3506.5	71379.5	1687.58	0
944705	4623.4	-4040368	3506.5	71383.9	1688.55	0
943733	4623.5	-4041340	3506.6	71401	1689.52	0
942413	4623.5	-4042660	3506.6	71424.4	1690.5	0
941396	4623.4	-4043677	3506.5	71442.3	1691.58	0
942588	4623.4	-4042485	3506.5	71421.3	1692.55	0
945133	4623.4	-4039940	3506.5	71376.3	1693.52	0
943633	4623.5	-4041440	3506.6	71402.8	1694.6	0
942199	4623.4	-4042874	3506.5	71428.1	1695.57	0
942410	4623.4	-4042664	3506.5	71424.4	1696.54	0
942686	4623.4	-4042387	3506.5	71419.5	1697.51	0
942638	4623.4	-4042435	3506.5	71420.4	1698.59	0
944371	4623.4	-4040703	3506.5	71389.8	1699.56	0
944967	4623.3	-4040106	3506.4	71379.2	1700.53	0
943564	4623.3	-4041509	3506.4	71404	1701.61	0
944016	4623.3	-4041057	3506.4	71396	1702.58	0
945115	4623.3	-4039958	3506.4	71376.6	1703.55	0
943010	4623.2	-4042064	3506.3	71413.8	1704.52	0
943774	4623.3	-4041299	3506.4	71400.3	1705.61	0
943340	4623.4	-4041733	3506.5	71408	1706.58	0
943161	4623.5	-4041912	3506.6	71411.1	1707.55	0
943340	4623.4	-4041733	3506.5	71408	1708.52	0
941408	4623.3	-4043665	3506.4	71442.1	1709.6	0
945285	4623.5	-4039788	3506.6	71373.6	1710.57	0
943509	4623.4	-4041564	3506.5	71405	1711.54	0
943143	4623.5	-4041930	3506.6	71411.5	1712.51	0
943231	4623.5	-4041842	3506.6	71409.9	1713.6	0
943579	4623.5	-4041494	3506.6	71403.8	1714.57	0
942424	4623.6	-4042649	3506.7	71424.2	1715.54	0
942424	4623.5	-4042649	3506.6	71424.2	1716.62	0
941748	4623.5	-4043326	3506.6	71436.1	1717.59	0
942250	4623.5	-4042823	3506.6	71427.2	1718.56	0
942182	4623.5	-4042891	3506.6	71428.4	1719.54	0
943454	4623.5	-4041619	3506.6	71406	1720.62	0
942259	4623.5	-4042814	3506.6	71427.1	1721.59	0
943941	4623.5	-4041132	3506.6	71397.4	1722.56	0
942732	4623.6	-4042341	3506.7	71418.7	1723.53	0
941561	4623.6	-4043512	3506.7	71439.4	1724.62	0
944411	4623.6	-4040662	3506.7	71389.1	1725.59	0
942287	4623.6	-4042787	3506.7	71426.6	1726.56	0
942806	4623.5	-4042267	3506.6	71417.4	1727.53	0
943269	4623.5	-4041804	3506.6	71409.2	1728.62	0
943497	4623.5	-4041576	3506.6	71405.2	1729.59	0
943668	4623.5	-4041405	3506.6	71402.2	1730.56	0
942246	4623.6	-4042827	3506.7	71427.3	1731.53	0
942110	4623.5	-4042963	3506.6	71429.7	1732.62	0
943920	4623.5	-4041153	3506.6	71397.7	1733.59	0
944146	4623.5	-4040927	3506.6	71393.7	1734.56	0
942686	4623.4	-4042387	3506.5	71419.5	1735.53	0
943751	4623.5	-4041322	3506.6	71400.7	1736.61	0
942513	4623.5	-4042561	3506.6	71422.6	1737.58	0
944204	4623.4	-4040870	3506.5	71392.7	1738.55	0
942970	4623.5	-4042103	3506.6	71414.5	1739.63	0
943844	4623.6	-4041229	3506.7	71399.1	1740.6	0
944634	4623.5	-4040440	3506.6	71385.1	1741.57	0
942173	4623.5	-4042900	3506.6	71428.6	1742.54	0
942192	4623.5	-4042882	3506.6	71428.3	1743.62	0
945224	4623.5	-4039849	3506.6	71374.7	1744.59	0
943621	4623.4	-4041452	3506.5	71403	1745.56	0
942954	4623.5	-4042119	3506.6	71414.8	1746.64	0
943166	4623.5	-4041907	3506.6	71411.1	1747.61	0
943291	4623.6	-4041783	3506.7	71408.8	1748.58	0
943013	4623.6	-4042060	3506.7	71413.8	1749.55	0
943328	4623.5	-4041745	3506.6	71408.2	1750.63	0
944256	4623.6	-4040817	3506.7	71391.8	1751.6	0
943823	4623.6	-4041250	3506.7	71399.4	1752.57	0
944688	4623.6	-4040385	3506.7	71384.2	1753.65	0
943903	4623.6	-4041170	3506.7	71398	1754.62	0
942530	4623.5	-4042543	3506.6	71422.3	1755.59	0
942823	4623.6	-4042250	3506.7	71417.1	1756.57	0
943181	4623.6	-4041892	3506.7	71410.8	1757.65	0
943499	4623.6	-4041575	3506.7	71405.2	1758.62	0
941653	4623.7	-4043420	3506.8	71437.8	1759.59	0
938870	4623.7	-4046203	3506.8	71486.9	1760.56	0
943012	4623.6	-4042062	3506.7	71413.8	1761.64	0
942328	4623.5	-4042745	3506.6	71425.9	1762.61	0
942663	4623.6	-4042411	3506.7	71419.9	1763.58	0
943810	4623.6	-4041263	3506.7	71399.7	1764.56	0
942367	4623.6	-4042706	3506.7	71425.2	1765.64	0
942784	4623.6	-4042289	3506.7	71417.8	1766.61	0
943906	4623.6	-4041167	3506.7	71398	1767.58	0
943606	4623.6	-4041468	3506.7	71403.3	1768.66	0
945488	4623.6	-4039585	3506.7	71370	1769.64	0
944749	4623.7	-4040324	3506.8	71383.1	1770.61	0
944086	4623.5	-4040987	3506.6	71394.8	1771.58	0
943115	4623.5	-4041958	3506.6	71411.9	1772.67	0
943693	4623.5	-4041380	3506.6	71401.7	1773.64	0
944955	4623.5	-4040118	3506.6	71379.4	1774.61	0
945141	4623.5	-4039932	3506.6	71376.2	1775.58	0
943536	4623.5	-4041538	3506.6	71404.5	1776.67	0
943273	4623.5	-4041800	3506.6	71409.2	1777.64	0
941757	4623.5	-4043317	3506.6	71435.9	1778.61	0
941764	4623.4	-4043309	3506.5	71435.8	1779.58	0
944711	4623.5	-4040362	3506.6	71383.8	1780.66	0
943342	4623.5	-4041731	3506.6	71407.9	1781.64	0
943851	4623.7	-4041222	3506.8	71398.9	1782.61	0
942527	4623.6	-4042547	3506.7	71422.4	1783.58	0
943908	4623.6	-4041165	3506.7	71397.9	1784.66	0
945555	4623.6	-4039518	3506.7	71368.8	1785.64	0
944544	4623.6	-4040529	3506.7	71386.7	1786.61	0
945441	4623.6	-4039632	3506.7	71370.9	1787.58	0
943286	4623.6	-4041787	3506.7	71408.9	1788.66	0
944289	4623.6	-4040784	3506.7	71391.2	1789.64	0
945165	4623.5	-4039909	3506.6	71375.7	1790.61	0
943645	4623.6	-4041428	3506.7	71402.6	1791.58	0
944923	4623.6	-4040150	3506.7	71380	1792.66	0
945771	4623.6	-4039303	3506.7	71365	1793.64	0
943875	4623.6	-4041198	3506.7	71398.5	1794.61	0
944261	4623.6	-4040812	3506.7	71391.7	1795.58	0
943695	4623.6	-4041378	3506.7	71401.7	1796.67	0
942761	4623.6	-4042313	3506.7	71418.2	1797.64	0
943667	4623.7	-4041407	3506.8	71402.2	1798.61	0
945183	4623.7	-4039890	3506.8	71375.4	1799.58	0
946043	4623.7	-4039030	3506.8	71360.2	1800.66	0
942418	4623.6	-4042655	3506.7	71424.3	1801.64	0
945001	4623.6	-4040072	3506.7	71378.6	1802.61	0
943069	4623.7	-4042004	3506.8	71412.8	1803.69	0
944148	4623.7	-4040925	3506.8	71393.7	1804.66	0
943351	4623.6	-4041723	3506.7	71407.8	1805.64	0
944849	4623.6	-4040224	3506.7	71381.3	1806.61	0
943139	4623.6	-4041935	3506.7	71411.5	1807.69	0
944382	4623.7	-4040691	3506.8	71389.6	1808.66	0
945231	4623.6	-4039842	3506.7	71374.6	1809.63	0
943369	4623.6	-4041704	3506.7	71407.5	1810.6	0
945434	4623.6	-4039640	3506.7	71371	1811.68	0
945459	4623.7	-4039614	3506.8	71370.5	1812.65	0
944514	4623.7	-4040559	3506.8	71387.2	1813.62	0
944615	4623.7	-4040458	3506.8	71385.4	1814.59	0
941078	4623.5	-4043995	3506.6	71447.9	1815.68	0
945757	4623.5	-4039316	3506.6	71365.3	1816.65	0
943263	4623.5	-4041810	3506.6	71409.3	1817.62	0
945527	4623.5	-4039546	3506.6	71369.3	1818.6	0
942449	4623.5	-4042624	3506.6	71423.7	1819.68	0
945498	4623.6	-4039575	3506.7	71369.8	1820.65	0
943821	4623.6	-4041252	3506.7	71399.5	1821.62	0
945177	4623.6	-4039896	3506.7	71375.5	1822.71	0
943752	4623.6	-4041321	3506.7	71400.7	1823.68	0
943891	4623.6	-4041182	3506.7	71398.2	1824.65	0
942857	4623.5	-4042216	3506.6	71416.5	1825.62	0
942818	4623.6	-4042255	3506.7	71417.2	1826.71	0
945233	4623.6	-4039840	3506.7	71374.5	1827.68	0
944479	4623.6	-4040594	3506.7	71387.9	1828.65	0
943560	4623.6	-4041513	3506.7	71404.1	1829.62	0
944229	4623.6	-4040845	3506.7	71392.3	1830.71	0
942306	4623.6	-4042767	3506.7	71426.2	1831.68	0
943715	4623.5	-4041358	3506.6	71401.3	1832.65	0
944175	4623.7	-4040898	3506.8	71393.2	1833.62	0
942575	4623.7	-4042498	3506.8	71421.5	1834.7	0
944128	4623.6	-4040945	3506.7	71394.1	1835.68	0
944011	4623.6	-4041063	3506.7	71396.1	1836.65	0
944640	4623.6	-4040433	3506.7	71385	1837.62	0
944989	4623.7	-4040084	3506.8	71378.8	1838.7	0
943373	4623.6	-4041701	3506.7	71407.4	1839.68	0
945172	4623.4	-4039901	3506.5	71375.6	1840.65	0
941999	4623.6	-4043074	3506.7	71431.7	1841.62	0
944594	4623.5	-4040479	3506.6	71385.8	1842.71	0
943938	4623.5	-4041135	3506.6	71397.4	1843.68	0
942649	4623.6	-4042424	3506.7	71420.2	1844.65	0
945810	4623.6	-4039263	3506.7	71364.3	1845.62	0
945006	4623.7	-4040068	3506.8	71378.5	1846.71	0
944436	4623.6	-4040637	3506.7	71388.6	1847.68	0
943796	4623.6	-4041277	3506.7	71399.9	1848.65	0
944996	4623.5	-4040077	3506.6	71378.7	1849.62	0
944122	4623.6	-4040951	3506.7	71394.2	1850.71	0
944227	4623.7	-4040846	3506.8	71392.3	1851.68	0
944042	4623.6	-4041031	3506.7	71395.6	1852.65	0
945728	4623.8	-4039346	3506.9	71365.8	1853.73	0
946094	4623.6	-4038979	3506.7	71359.3	1854.7	0
946011	4623.7	-4039062	3506.8	71360.8	1855.67	0
943756	4623.7	-4041317	3506.8	71400.6	1856.64	0
943654	4623.6	-4041419	3506.7	71402.4	1857.73	0
945592	4623.7	-4039482	3506.8	71368.2	1858.7	0
943598	4623.6	-4041475	3506.7	71403.4	1859.67	0
944152	4623.6	-4040921	3506.7	71393.6	1860.64	0
942827	4623.7	-4042246	3506.8	71417	1861.72	0
942736	4623.6	-4042337	3506.7	71418.6	1862.69	0
944894	4623.7	-4040179	3506.8	71380.5	1863.66	0
942845	4623.7	-4042228	3506.8	71416.7	1864.75	0
942972	4623.8	-4042102	3506.9	71414.5	1865.72	0
942271	4623.8	-4042802	3506.9	71426.9	1866.69	0
943874	4623.8	-4041199	3506.9	71398.5	1867.65	0
943579	4623.9	-4041494	3507	71403.8	1868.74	0
943722	4623.8	-4041351	3506.9	71401.2	1869.72	0
943991	4623.8	-4041082	3506.9	71396.5	1870.69	0
942630	4623.7	-4042443	3506.8	71420.5	1871.65	0
943069	4623.8	-4042004	3506.9	71412.8	1872.74	0
945029	4623.7	-4040044	3506.8	71378.1	1873.72	0
945886	4623.7	-4039188	3506.8	71363	1874.69	0
944550	4623.7	-4040524	3506.8	71386.6	1875.66	0
942195	4623.7	-4042878	3506.8	71428.2	1876.75	0
943220	4623.6	-4041854	3506.7	71410.1	1877.72	0
943837	4623.7	-4041236	3506.8	71399.2	1878.69	0
944793	4623.6	-4040280	3506.7	71382.3	1879.66	0
944533	4623.8	-4040541	3506.9	71386.9	1880.75	0
945431	4623.6	-4039642	3506.7	71371	1881.72	0
944136	4625.8	-4040938	3508.9	71393.9	1882.69	0
946251	4626	-4038822	3509.1	71356.5	1883.66	0
941864	4624.7	-4043209	3507.8	71434.1	1884.75	0
942859	4624.1	-4042215	3507.2	71416.5	1885.72	0
943975	4623.5	-4041098	3506.6	71396.8	1886.69	0
945370	4623.5	-4039703	3506.6	71372.1	1887.66	0
939936	4624.1	-4045137	3507.2	71468.1	1888.75	0
939490	4625.6	-4045583	3508.7	71476	1889.72	0
941214	4625.6	-4043859	3508.7	71445.5	1890.69	0
942790	4624.9	-4042283	3508	71417.7	1891.66	0
945736	4623.3	-4039337	3506.4	71365.6	1892.75	0
939930	4623.1	-4045143	3506.2	71468.2	1893.72	0
940728	4625	-4044345	3508.1	71454.1	1894.69	0
941833	4624.2	-4043240	3507.3	71434.6	1895.66	0
941429	4624.1	-4043644	3507.2	71441.7	1896.74	0
942847	4624.1	-4042226	3507.2	71416.7	1897.71	0
942680	4624.2	-4042393	3507.3	71419.6	1898.68	0
943824	4624.2	-4041249	3507.3	71399.4	1899.77	0
942674	4624.2	-4042399	3507.3	71419.7	1900.74	0
942675	4624.2	-4042398	3507.3	71419.7	1901.7	0
942563	4624.2	-4042510	3507.3	71421.7	1902.67	0
942654	4624.3	-4042419	3507.4	71420.1	1903.76	0
943169	4624.3	-4041905	3507.4	71411	1904.72	0
943450	4624.3	-4041624	3507.4	71406	1905.69	0
942512	4624.3	-4042562	3507.4	71422.6	1906.78	0
943176	4624.2	-4041898	3507.3	71410.9	1907.74	0
942552	4624	-4042521	3507.1	71421.9	1908.71	0
944121	4624.1	-4040953	3507.2	71394.2	1909.68	0
942613	4624	-4042461	3507.1	71420.8	1910.77	0
942893	4624	-4042180	3507.1	71415.9	1911.73	0
943368	4624.1	-4041705	3507.2	71407.5	1912.7	0
941989	4624.1	-4043084	3507.2	71431.8	1913.68	0
943525	4624.2	-4041548	3507.3	71404.7	1914.76	0
940411	4624.1	-4044662	3507.2	71459.7	1915.73	0
942600	4624.3	-4042473	3507.4	71421.1	1916.69	0
940622	4625	-4044451	3508.1	71456	1917.78	0
943275	4624.3	-4041798	3507.4	71409.1	1918.75	0
943950	4624.3	-4041123	3507.4	71397.2	1919.71	0
942089	4624.3	-4042984	3507.4	71430.1	1920.69	0
943572	4624.2	-4041501	3507.3	71403.9	1921.77	0
941250	4624.3	-4043823	3507.4	71444.9	1922.73	0
943318	4624.2	-4041756	3507.3	71408.4	1923.7	0
942434	4624.3	-4042639	3507.4	71424	1924.79	0
942097	4624.2	-4042976	3507.3	71429.9	1925.76	0
942018	4624.3	-4043056	3507.4	71431.3	1926.73	0
942411	4624.2	-4042662	3507.3	71424.4	1927.69	0
943310	4624.1	-4041763	3507.2	71408.5	1928.78	0
941833	4624.2	-4043240	3507.3	71434.6	1929.75	0
944058	4624.1	-4041015	3507.2	71395.3	1930.72	0
942805	4624.2	-4042268	3507.3	71417.4	1931.8	0
941043	4624.3	-4044030	3507.4	71448.6	1932.77	0
943232	4624.3	-4041841	3507.4	71409.9	1933.73	0
938710	4624.3	-4046363	3507.4	71489.8	1934.7	0
940143	4624.7	-4044930	3507.8	71464.5	1935.79	0
935671	4624.6	-4049403	3507.7	71543.5	1936.76	0
936828	4625.1	-4048245	3508.2	71523	1937.72	0
937520	4624.3	-4047553	3507.4	71510.8	1938.81	0
935482	4625	-4049591	3508.1	71546.8	1939.78	0
936339	4626.6	-4048734	3509.7	71531.7	1940.75	0
936042	4625.1	-4049031	3508.2	71536.9	1941.72	0
938212	4624.2	-4046861	3507.3	71498.6	1942.8	0
938738	4623.9	-4046335	3507	71489.3	1943.77	0
939573	4623.8	-4045500	3506.9	71474.5	1944.73	0
938373	4624.5	-4046700	3507.6	71495.7	1945.71	0
937791	4625.1	-4047282	3508.2	71506	1946.79	0
939103	4624.4	-4045970	3507.5	71482.8	1947.76	0
943145	4624.4	-4041928	3507.5	71411.4	1948.73	0
942242	4622.3	-4042831	3505.4	71427.4	1949.82	0
941714	4624.4	-4043359	3507.5	71436.7	1950.79	0
939664	4624.3	-4045409	3507.4	71472.9	1951.76	0
940512	4624.3	-4044561	3507.4	71457.9	1952.73	0
940047	4624.3	-4045026	3507.4	71466.2	1953.81	0
940376	4624.4	-4044697	3507.5	71460.3	1954.78	0
941106	4624.6	-4043967	3507.7	71447.4	1955.75	0
940234	4624.4	-4044839	3507.5	71462.9	1956.72	0
936997	4624.9	-4048076	3508	71520	1957.8	0
940510	4625.4	-4044563	3508.5	71458	1958.77	0
939151	4624.9	-4045922	3508	71482	1959.74	0
939939	4625	-4045134	3508.1	71468.1	1960.82	0
938112	4625	-4046961	3508.1	71500.3	1961.79	0
938967	4624.9	-4046106	3508	71485.2	1962.76	0
939892	4624.9	-4045181	3508	71468.9	1963.72	0
939564	4625	-4045510	3508.1	71474.7	1964.81	0
941115	4624.8	-4043959	3507.9	71447.3	1965.78	0
940322	4624.5	-4044751	3507.6	71461.3	1966.75	0
940349	4624.3	-4044724	3507.4	71460.8	1967.83	0
941768	4624.4	-4043305	3507.5	71435.8	1968.8	0
939720	4624.6	-4045353	3507.7	71471.9	1969.77	0
940977	4624.4	-4044096	3507.5	71449.7	1970.73	0
942928	4624.4	-4042146	3507.5	71415.3	1971.82	0
942571	4624.5	-4042502	3507.6	71421.6	1972.79	0
940254	4624.4	-4044820	3507.5	71462.5	1973.76	0
941723	4624.4	-4043350	3507.5	71436.5	1974.84	0
940552	4624.5	-4044521	3507.6	71457.2	1975.81	0
939937	4624.4	-4045136	3507.5	71468.1	1976.78	0
941550	4624.4	-4043523	3507.5	71439.6	1977.75	0
943230	4624.8	-4041844	3507.9	71409.9	1978.83	0
940970	4624.7	-4044103	3507.8	71449.9	1979.8	0
940828	4624.7	-4044245	3507.8	71452.4	1980.77	0
938971	4624.7	-4046103	3507.8	71485.2	1981.74	0
939831	4624.8	-4045242	3507.9	71470	1982.83	0
940005	4624.8	-4045068	3507.9	71466.9	1983.8	0
940226	4624.7	-4044847	3507.8	71463	1984.76	0
938690	4624.8	-4046383	3507.9	71490.1	1985.85	0
940050	4624.8	-4045023	3507.9	71466.1	1986.82	0
939882	4624.8	-4045191	3507.9	71469.1	1987.79	0
940269	4624.8	-4044804	3507.9	71462.2	1988.76	0
939605	4624.8	-4045468	3507.9	71474	1989.84	0
941256	4624.6	-4043817	3507.7	71444.8	1990.81	0
939880	4624.5	-4045193	3507.6	71469.1	1991.78	0
941381	4624.5	-4043692	3507.6	71442.6	1992.75	0
941662	4624.5	-4043412	3507.6	71437.6	1993.84	0
941121	4624.5	-4043952	3507.6	71447.2	1994.81	0
941634	4624.6	-4043439	3507.7	71438.1	1995.78	0
940521	4624.6	-4044553	3507.7	71457.8	1996.86	0
940364	4624.5	-4044709	3507.6	71460.6	1997.83	0
[truncated: 1,673 more rows]

## Sheet: Bulk mode_3
SRS QCM200 Data File
Data Taken on 2/3/2021 at 9:41:18 AM
Tag Definitions
Zero Rel F = 1
Zero Rel R = 2
Zero Rel F and R = 3
User Tag = 4
Begining of File = 5
The Sauerbrey model was used to calculate the relative mass change.
Notes:
Raw F (Hz)	Raw R (Ohms)	Delta F (Hz)	Delta R (Ohms)	Delta Mass (ug/cm2)	Time (s)	Tag
4981557	996.84	0	0	0	0.049	5
4.98156e+06	996.83	-0.7	-0.01	0.0123674	6.704	0
4.98156e+06	996.84	-0.9	0	0.0159009	7.705	0
4.98156e+06	996.84	-0.9	0	0.0159009	8.801	0
4981556	996.84	-1	0	0.0176677	9.777	0
4.98156e+06	996.84	-1.1	0	0.0194344	10.754	0
4.98156e+06	996.84	-1.2	0	0.0212012	11.734	0
4.98156e+06	996.84	-1.3	0	0.022968	12.716	0
4.98156e+06	996.85	-1.4	0.01	0.0247347	13.807	0
4.98156e+06	996.86	-1.5	0.02	0.0265015	14.788	0
4.98156e+06	996.85	-1.7	0.01	0.030035	15.766	0
4.98156e+06	996.86	-1.8	0.02	0.0318018	16.745	0
4.98156e+06	996.86	-1.9	0.02	0.0335686	17.723	0
4981555	996.86	-2	0.02	0.0353353	18.818	0
4981555	996.87	-2	0.03	0.0353353	19.795	0
4.98155e+06	996.86	-2.2	0.02	0.0388689	20.773	0
4.98155e+06	996.87	-2.2	0.03	0.0388689	21.754	0
4.98155e+06	996.87	-2.4	0.03	0.0424024	22.726	0
4.98155e+06	996.87	-2.4	0.03	0.0424024	23.819	0
4.98155e+06	996.87	-2.6	0.03	0.0459359	24.788	0
4.98155e+06	996.87	-2.7	0.03	0.0477027	25.768	0
4.98155e+06	996.87	-2.8	0.03	0.0494694	26.736	0
4.98155e+06	996.86	-2.9	0.02	0.0512362	27.827	0
4981554	996.86	-3	0.02	0.053003	28.798	0
4.98155e+06	996.87	-3.1	0.03	0.0547697	29.776	0
4.98155e+06	996.88	-3.2	0.04	0.0565365	30.746	0
4.98155e+06	996.87	-3.2	0.03	0.0565365	31.726	0
4.98155e+06	996.88	-3.4	0.04	0.06007	32.809	0
4.98155e+06	996.88	-3.5	0.04	0.0618368	33.786	0
4.98155e+06	996.87	-3.6	0.03	0.0636036	34.758	0
4.98155e+06	996.87	-3.7	0.03	0.0653703	35.739	0
4.98155e+06	996.87	-3.7	0.03	0.0653703	36.82	0
4.98155e+06	996.87	-3.9	0.03	0.0689039	37.798	0
4981553	996.89	-4	0.05	0.0706706	38.768	0
4.98155e+06	996.87	-4.1	0.03	0.0724374	39.746	0
4.98155e+06	996.86	-4.2	0.02	0.0742042	40.83	0
4.98155e+06	996.86	-4.3	0.02	0.0759709	41.81	0
4.98155e+06	996.86	-4.4	0.02	0.0777377	42.778	0
4.98155e+06	996.87	-4.6	0.03	0.0812712	43.755	0
4.98155e+06	996.87	-4.6	0.03	0.0812712	44.841	0
4.98155e+06	996.87	-4.7	0.03	0.083038	45.811	0
4.98155e+06	996.88	-4.9	0.04	0.0865715	46.787	0
4981552	996.87	-5	0.03	0.0883383	47.757	0
4.98155e+06	996.88	-5.1	0.04	0.0901051	48.849	0
4.98155e+06	996.87	-5.1	0.03	0.0901051	49.82	0
4.98155e+06	996.88	-5.2	0.04	0.0918718	50.789	0
4.98155e+06	996.89	-5.3	0.05	0.0936386	51.767	0
4.98155e+06	996.88	-5.4	0.04	0.0954054	52.85	0
4.98155e+06	996.88	-5.6	0.04	0.0989389	53.82	0
4.98155e+06	996.89	-5.7	0.05	0.100706	54.789	0
4.98155e+06	996.89	-5.7	0.05	0.100706	55.759	0
4.98155e+06	996.9	-5.9	0.06	0.104239	56.85	0
4981551	996.9	-6	0.06	0.106006	57.819	0
4.98155e+06	996.91	-6.1	0.07	0.107773	58.788	0
4.98155e+06	996.91	-6.2	0.07	0.109539	59.764	0
4.98155e+06	996.9	-6.2	0.06	0.109539	60.849	0
4.98155e+06	996.9	-6.4	0.06	0.113073	61.828	0
4.98155e+06	996.9	-6.4	0.06	0.113073	62.799	0
4.98155e+06	996.91	-6.6	0.07	0.116607	63.769	0
4.98155e+06	996.9	-6.7	0.06	0.118373	64.852	0
4.98155e+06	996.91	-6.9	0.07	0.121907	65.82	0
4.98155e+06	996.9	-6.9	0.06	0.121907	66.797	0
4981550	996.9	-7	0.06	0.123674	67.767	0
4.98155e+06	996.91	-7.1	0.07	0.12544	68.85	0
4.98155e+06	996.91	-7.2	0.07	0.127207	69.819	0
4.98155e+06	996.91	-7.3	0.07	0.128974	70.79	0
4.98155e+06	996.91	-7.4	0.07	0.130741	71.767	0
4.98155e+06	996.92	-7.4	0.08	0.130741	72.85	0
4.98155e+06	996.91	-7.6	0.07	0.134274	73.819	0
4.98155e+06	996.91	-7.7	0.07	0.136041	74.788	0
4.98155e+06	996.92	-7.8	0.08	0.137808	75.871	0
4.98155e+06	996.91	-7.9	0.07	0.139574	76.85	0
4981549	996.91	-8	0.07	0.141341	77.82	0
4.98155e+06	996.91	-8.1	0.07	0.143108	78.789	0
4.98155e+06	996.91	-8.2	0.07	0.144875	79.875	0
4.98155e+06	996.91	-8.2	0.07	0.144875	80.847	0
4.98155e+06	996.9	-8.4	0.06	0.148408	81.826	0
4.98155e+06	996.91	-8.5	0.07	0.150175	82.797	0
4.98155e+06	996.91	-8.6	0.07	0.151942	83.882	0
4.98155e+06	996.91	-8.7	0.07	0.153709	84.852	0
4.98155e+06	996.91	-8.7	0.07	0.153709	85.82	0
4981548	996.91	-9	0.07	0.159009	86.797	0
4.98155e+06	996.92	-9.1	0.08	0.160776	87.882	0
4.98155e+06	996.91	-9.2	0.07	0.162543	88.853	0
4.98155e+06	996.91	-9.2	0.07	0.162543	89.823	0
4.98155e+06	996.91	-9.3	0.07	0.164309	90.792	0
4.98155e+06	996.92	-9.4	0.08	0.166076	91.884	0
4.98155e+06	996.91	-9.6	0.07	0.169609	92.856	0
4.98155e+06	996.91	-9.6	0.07	0.169609	93.828	0
4.98155e+06	996.91	-9.7	0.07	0.171376	94.799	0
4.98155e+06	996.93	-9.9	0.09	0.17491	95.884	0
4981547	996.93	-10	0.09	0.176677	96.861	0
4.98155e+06	996.93	-10.1	0.09	0.178443	97.83	0
4.98155e+06	996.92	-10.1	0.08	0.178443	98.801	0
4.98155e+06	996.92	-10.2	0.08	0.18021	99.888	0
4.98155e+06	996.92	-10.4	0.08	0.183744	100.86	0
4.98155e+06	996.93	-10.5	0.09	0.18551	101.837	0
4.98155e+06	996.92	-10.6	0.08	0.187277	102.809	0
4.98155e+06	996.93	-10.7	0.09	0.189044	103.892	0
4.98155e+06	996.95	-10.7	0.11	0.189044	104.86	0
4.98155e+06	996.94	-10.9	0.1	0.192578	105.83	0
4981546	996.95	-11	0.11	0.194344	106.8	0
4.98155e+06	996.95	-11.1	0.11	0.196111	107.887	0
4.98155e+06	996.95	-11.2	0.11	0.197878	108.86	0
4.98155e+06	996.95	-11.3	0.11	0.199645	109.829	0
4.98155e+06	996.96	-11.4	0.12	0.201411	110.799	0
4.98155e+06	996.95	-11.6	0.11	0.204945	111.892	0
4.98155e+06	996.96	-11.6	0.12	0.204945	112.86	0
4.98155e+06	996.96	-11.7	0.12	0.206712	113.829	0
4.98155e+06	996.96	-11.9	0.12	0.210245	114.803	0
4981545	996.97	-12	0.13	0.212012	115.89	0
4981545	996.97	-12	0.13	0.212012	116.861	0
4.98154e+06	996.96	-12.1	0.12	0.213779	117.83	0
4.98154e+06	996.97	-12.2	0.13	0.215546	118.802	0
4.98154e+06	996.97	-12.4	0.13	0.219079	119.889	0
4.98154e+06	996.97	-12.5	0.13	0.220846	120.859	0
4.98154e+06	996.97	-12.6	0.13	0.222612	121.837	0
4.98154e+06	996.97	-12.7	0.13	0.224379	122.811	0
4.98154e+06	996.97	-12.7	0.13	0.224379	123.894	0
4.98154e+06	996.98	-12.9	0.14	0.227913	124.864	0
4981544	996.98	-13	0.14	0.22968	125.831	0
4.98154e+06	996.98	-13.1	0.14	0.231446	126.914	0
4.98154e+06	996.98	-13.2	0.14	0.233213	127.887	0
4.98154e+06	996.99	-13.2	0.15	0.233213	128.859	0
4.98154e+06	996.99	-13.4	0.15	0.236747	129.829	0
4.98154e+06	996.98	-13.5	0.14	0.238513	130.912	0
4.98154e+06	996.98	-13.6	0.14	0.24028	131.89	0
4.98154e+06	996.96	-13.8	0.12	0.243814	132.86	0
4.98154e+06	996.99	-13.8	0.15	0.243814	133.829	0
4981543	996.98	-14	0.14	0.247347	134.912	0
4.98154e+06	996.98	-14.1	0.14	0.249114	135.882	0
4.98154e+06	996.99	-14.1	0.15	0.249114	136.852	0
4.98154e+06	996.99	-14.2	0.15	0.250881	137.824	0
4.98154e+06	996.98	-14.3	0.14	0.252648	138.909	0
4.98154e+06	996.99	-14.4	0.15	0.254414	139.88	0
4.98154e+06	996.99	-14.6	0.15	0.257948	140.85	0
4.98154e+06	996.99	-14.6	0.15	0.257948	141.828	0
4.98154e+06	996.99	-14.7	0.15	0.259715	142.912	0
4.98154e+06	997.01	-14.9	0.17	0.263248	143.882	0
4.98154e+06	997.01	-14.9	0.17	0.263248	144.853	0
4.98154e+06	997.01	-14.9	0.17	0.263248	145.936	0
4.98154e+06	996.92	-14.9	0.08	0.263248	146.903	0
4981542	996.85	-15	0.01	0.265015	147.872	0
4.98154e+06	996.89	-15.1	0.05	0.266782	148.842	0
4.98154e+06	996.87	-15.2	0.03	0.268548	149.93	0
4.98154e+06	996.88	-15.2	0.04	0.268548	150.901	0
4.98154e+06	996.88	-15.4	0.04	0.272082	151.875	0
4.98154e+06	996.89	-15.4	0.05	0.272082	152.847	0
4.98154e+06	996.87	-15.6	0.03	0.275616	153.932	0
4.98154e+06	996.97	-15.7	0.13	0.277382	154.903	0
4.98154e+06	996.87	-15.7	0.03	0.277382	155.872	0
4.98154e+06	996.63	-15.7	-0.21	0.277382	156.842	0
4.98154e+06	996.62	-15.8	-0.22	0.279149	157.93	0
4.98154e+06	996.62	-15.9	-0.22	0.280916	158.902	0
4.98154e+06	996.62	-15.9	-0.22	0.280916	159.871	0
4.98154e+06	996.63	-15.9	-0.21	0.280916	160.845	0
4.98154e+06	996.63	-15.7	-0.21	0.277382	161.935	0
4.98154e+06	996.64	-15.5	-0.2	0.273849	162.906	0
4.98154e+06	996.63	-15.3	-0.21	0.270315	163.875	0
4981542	996.62	-15	-0.22	0.265015	164.849	0
4.98154e+06	996.61	-14.6	-0.23	0.257948	165.934	0
4.98154e+06	996.61	-14.1	-0.23	0.249114	166.903	0
4.98154e+06	996.6	-13.6	-0.24	0.24028	167.872	0
4.98154e+06	996.58	-12.9	-0.26	0.227913	168.955	0
4.98154e+06	996.57	-12.1	-0.27	0.213779	169.926	0
4.98155e+06	996.56	-11.3	-0.28	0.199645	170.898	0
4.98155e+06	996.54	-10.3	-0.3	0.181977	171.872	0
4.98155e+06	996.51	-9.1	-0.33	0.160776	172.956	0
4.98155e+06	996.5	-7.9	-0.34	0.139574	173.926	0
4.98155e+06	996.5	-6.7	-0.34	0.118373	174.898	0
4.98155e+06	996.47	-5.1	-0.37	0.0901051	175.869	0
4.98155e+06	996.45	-3.7	-0.39	0.0653703	176.953	0
4.98156e+06	996.43	-1.9	-0.41	0.0335686	177.925	0
4.98156e+06	996.4	-0.1	-0.44	0.00176677	178.897	0
4.98156e+06	996.37	1.7	-0.47	-0.030035	179.869	0
4.98156e+06	996.36	3.8	-0.48	-0.0671371	180.956	0
4981563	996.34	6	-0.5	-0.106006	181.936	0
4.98157e+06	996.32	8.3	-0.52	-0.146642	182.906	0
4.98157e+06	996.3	10.7	-0.54	-0.189044	183.876	0
4.98157e+06	996.29	13.1	-0.55	-0.231446	184.964	0
4.98157e+06	996.26	15.8	-0.58	-0.279149	185.935	0
4.98158e+06	996.23	18.5	-0.61	-0.326852	186.902	0
4.98158e+06	996.21	21.4	-0.63	-0.378088	187.872	0
4.98158e+06	996.16	24.3	-0.68	-0.429324	188.955	0
4.98158e+06	996.16	27.3	-0.68	-0.482327	189.932	0
4.98159e+06	996.12	30.5	-0.72	-0.538864	190.903	0
4.98159e+06	996.09	33.9	-0.75	-0.598934	191.871	0
4.98159e+06	996.06	37.2	-0.78	-0.657237	192.963	0
4.9816e+06	996.02	40.7	-0.82	-0.719074	193.935	0
4.9816e+06	995.98	44.1	-0.86	-0.779144	194.906	0
4.9816e+06	995.95	47.8	-0.89	-0.844514	195.882	0
4.98161e+06	995.92	51.6	-0.92	-0.911651	196.967	0
4.98161e+06	995.89	55.4	-0.95	-0.978788	197.939	0
4.98162e+06	995.85	59.3	-0.99	-1.04769	198.911	0
4.98162e+06	995.82	63.3	-1.02	-1.11836	199.883	0
4.98162e+06	995.79	67.3	-1.05	-1.18903	200.971	0
4.98163e+06	995.77	71.6	-1.07	-1.265	201.945	0
4.98163e+06	995.75	75.8	-1.09	-1.33921	202.914	0
4981637	995.75	80	-1.09	-1.41341	203.887	0
4.98164e+06	995.72	84.4	-1.12	-1.49115	204.974	0
4.98165e+06	995.68	88.9	-1.16	-1.57065	205.945	0
4.98165e+06	995.65	93.4	-1.19	-1.65016	206.914	0
4.98165e+06	995.63	97.9	-1.21	-1.72966	207.886	0
4.98166e+06	995.6	102.6	-1.24	-1.8127	208.973	0
4.98166e+06	995.58	107.2	-1.26	-1.89397	209.943	0
4981669	995.56	112	-1.28	-1.97878	210.917	0
4.98167e+06	995.53	116.9	-1.31	-2.06535	211.889	0
4.98168e+06	995.5	121.8	-1.34	-2.15192	212.974	0
4.98168e+06	995.47	126.7	-1.37	-2.23849	213.944	0
4.98169e+06	995.45	131.6	-1.39	-2.32506	214.914	0
4.98169e+06	995.41	136.6	-1.43	-2.4134	215.997	0
4.9817e+06	995.39	141.7	-1.45	-2.50351	216.967	0
4.9817e+06	995.39	146.8	-1.45	-2.59361	217.936	0
4.98171e+06	995.38	151.9	-1.46	-2.68372	218.909	0
4.98171e+06	995.37	157.1	-1.47	-2.77559	219.994	0
4.98172e+06	995.34	162.4	-1.5	-2.86923	220.965	0
4.98172e+06	995.32	167.8	-1.52	-2.96463	221.942	0
4.98173e+06	995.3	173.1	-1.54	-3.05827	222.912	0
4.98174e+06	995.28	178.4	-1.56	-3.15191	223.995	0
4.98174e+06	995.25	183.9	-1.59	-3.24908	224.965	0
4.98175e+06	995.22	189.3	-1.62	-3.34449	225.936	0
4.98175e+06	995.2	194.8	-1.64	-3.44166	226.906	0
4.98176e+06	995.19	200.3	-1.65	-3.53883	227.99	0
4.98176e+06	995.17	205.9	-1.67	-3.63777	228.962	0
4.98177e+06	995.15	211.4	-1.69	-3.73494	229.934	0
4981774	995.12	217	-1.72	-3.83388	230.907	0
4.98178e+06	995.07	222.8	-1.77	-3.93635	231.99	0
4.98179e+06	995.07	228.3	-1.77	-4.03353	232.962	0
4981791	995.06	234	-1.78	-4.13423	233.934	0
4.9818e+06	995.03	239.8	-1.81	-4.2367	235.018	0
4.9818e+06	995.01	245.6	-1.83	-4.33918	235.986	0
4.98181e+06	994.98	251.3	-1.86	-4.43988	236.956	0
4.98181e+06	994.96	257.1	-1.88	-4.54236	237.929	0
4981820	994.94	263	-1.9	-4.64659	239.016	0
4.98183e+06	994.91	268.9	-1.93	-4.75083	239.986	0
4.98183e+06	994.88	274.8	-1.96	-4.85507	240.955	0
4.98184e+06	994.87	280.7	-1.97	-4.95931	241.934	0
4.98184e+06	994.85	286.6	-1.99	-5.06355	243.018	0
4.98185e+06	994.83	292.5	-2.01	-5.16779	243.986	0
4.98186e+06	994.82	298.4	-2.02	-5.27203	244.955	0
4.98186e+06	994.8	304.4	-2.04	-5.37804	245.926	0
4.98187e+06	994.79	310.5	-2.05	-5.48581	247.013	0
4.98187e+06	994.79	316.5	-2.05	-5.59182	247.985	0
4.98188e+06	994.75	322.6	-2.09	-5.69959	248.954	0
4.98189e+06	994.73	328.6	-2.11	-5.80559	249.925	0
4.98189e+06	994.7	334.6	-2.14	-5.9116	251.009	0
4.9819e+06	994.68	340.7	-2.16	-6.01937	251.978	0
4.9819e+06	994.67	346.8	-2.17	-6.12714	252.945	0
4.98191e+06	994.64	352.8	-2.2	-6.23315	254.025	0
4.98192e+06	994.62	358.9	-2.22	-6.34092	254.995	0
4.98192e+06	994.6	365.1	-2.24	-6.45046	255.966	0
4.98193e+06	994.58	371.2	-2.26	-6.55824	256.935	0
4.98193e+06	994.55	377.3	-2.29	-6.66601	258.017	0
4.98194e+06	994.53	383.5	-2.31	-6.77555	258.986	0
4.98195e+06	994.51	389.8	-2.33	-6.88685	259.954	0
4.98195e+06	994.49	395.9	-2.35	-6.99463	261.038	0
4.98196e+06	994.47	402.1	-2.37	-7.10417	262.009	0
4.98197e+06	994.47	408.3	-2.37	-7.21371	262.978	0
4.98197e+06	994.45	414.4	-2.39	-7.32148	263.945	0
4.98198e+06	994.43	420.8	-2.41	-7.43455	265.027	0
4981984	994.41	427	-2.43	-7.54409	265.995	0
4.98199e+06	994.38	433.2	-2.46	-7.65363	266.966	0
4.982e+06	994.36	439.4	-2.48	-7.76317	267.935	0
4.982e+06	994.34	445.8	-2.5	-7.87624	269.017	0
4.98201e+06	994.32	451.9	-2.52	-7.98402	269.986	0
4.98202e+06	994.29	458.2	-2.55	-8.09532	270.954	0
4.98202e+06	994.27	464.5	-2.57	-8.20663	272.038	0
4.98203e+06	994.26	470.7	-2.58	-8.31617	273.007	0
4982034	994.23	477	-2.61	-8.42747	273.976	0
4.98204e+06	994.21	483.3	-2.63	-8.53878	274.947	0
4.98205e+06	994.19	489.6	-2.65	-8.65009	276.027	0
4.98205e+06	994.19	495.8	-2.65	-8.75963	276.995	0
4.98206e+06	994.17	502.1	-2.67	-8.87093	277.966	0
4.98207e+06	994.14	508.5	-2.7	-8.98401	279.05	0
4.98207e+06	994.12	514.8	-2.72	-9.09531	280.019	0
4982078	994.1	521	-2.74	-9.20485	280.986	0
4.98208e+06	994.07	527.3	-2.77	-9.31616	281.954	0
4.98209e+06	994.06	533.7	-2.78	-9.42923	283.038	0
4982097	994.02	540	-2.82	-9.54054	284.007	0
4.9821e+06	994	546.3	-2.84	-9.65184	284.976	0
4.98211e+06	993.98	552.6	-2.86	-9.76315	286.06	0
4.98212e+06	993.96	558.9	-2.88	-9.87446	287.027	0
4.98212e+06	993.94	565.3	-2.9	-9.98753	287.995	0
4.98213e+06	993.91	571.6	-2.93	-10.0988	288.966	0
4.98213e+06	993.87	577.9	-2.97	-10.2101	290.05	0
4.98214e+06	993.86	584.2	-2.98	-10.3215	291.019	0
4.98215e+06	993.86	590.5	-2.98	-10.4328	291.986	0
4.98215e+06	993.83	596.8	-3.01	-10.5441	293.068	0
4.98216e+06	993.81	603.1	-3.03	-10.6554	294.038	0
4.98217e+06	993.79	609.4	-3.05	-10.7667	295.007	0
4.98217e+06	993.77	615.8	-3.07	-10.8797	295.976	0
4.98218e+06	993.75	622.1	-3.09	-10.991	297.06	0
4.98219e+06	993.73	628.3	-3.11	-11.1006	298.027	0
4.98219e+06	993.7	634.7	-3.14	-11.2137	298.995	0
4982198	993.68	641	-3.16	-11.325	299.97	0
4.9822e+06	993.66	647.3	-3.18	-11.4363	301.056	0
4.98221e+06	993.64	653.6	-3.2	-11.5476	302.027	0
4.98222e+06	993.63	659.9	-3.21	-11.6589	302.995	0
4.98222e+06	993.6	666.1	-3.24	-11.7684	304.079	0
4.98223e+06	993.58	672.4	-3.26	-11.8797	305.05	0
4.98224e+06	993.58	678.7	-3.26	-11.991	306.019	0
4.98224e+06	993.56	685.1	-3.28	-12.1041	306.989	0
4.98225e+06	993.53	691.3	-3.31	-12.2136	308.07	0
4.98225e+06	993.51	697.6	-3.33	-12.325	309.039	0
4.98226e+06	993.48	703.9	-3.36	-12.4363	310.009	0
4.98227e+06	993.47	710.1	-3.37	-12.5458	310.982	0
4.98227e+06	993.45	716.4	-3.39	-12.6571	312.067	0
4.98228e+06	993.44	722.7	-3.4	-12.7684	313.038	0
4.98229e+06	993.41	728.9	-3.43	-12.878	314.008	0
4.98229e+06	993.4	735.2	-3.44	-12.9893	315.093	0
4.9823e+06	993.38	741.4	-3.46	-13.0988	316.065	0
4.9823e+06	993.37	747.8	-3.47	-13.2119	317.036	0
4982311	993.33	754	-3.51	-13.3214	318.007	0
4.98232e+06	993.3	760.3	-3.54	-13.4327	319.092	0
4.98232e+06	993.28	766.5	-3.56	-13.5423	320.064	0
4.98233e+06	993.28	772.6	-3.56	-13.65	321.038	0
4.98234e+06	993.25	778.9	-3.59	-13.7613	322.008	0
4.98234e+06	993.23	785.1	-3.61	-13.8709	323.093	0
4.98235e+06	993.21	791.3	-3.63	-13.9804	324.065	0
4.98235e+06	993.2	797.5	-3.64	-14.09	325.036	0
4.98236e+06	993.17	803.8	-3.67	-14.2013	326.008	0
4.98237e+06	993.15	809.9	-3.69	-14.309	327.093	0
4982373	993.12	816	-3.72	-14.4168	328.065	0
4.98238e+06	993.1	822.2	-3.74	-14.5264	329.036	0
4.98239e+06	993.09	828.4	-3.75	-14.6359	330.008	0
4.98239e+06	993.05	834.6	-3.79	-14.7454	331.093	0
4.9824e+06	993.04	840.7	-3.8	-14.8532	332.065	0
4.9824e+06	993.02	846.9	-3.82	-14.9627	333.037	0
4982410	993	853	-3.84	-15.0705	334.006	0
4.98242e+06	992.97	859.1	-3.87	-15.1783	335.09	0
4.98242e+06	992.97	865.2	-3.87	-15.2861	336.059	0
4.98243e+06	992.94	871.3	-3.9	-15.3938	337.028	0
4.98243e+06	992.91	877.4	-3.93	-15.5016	338.11	0
4.98244e+06	992.88	883.6	-3.96	-15.6112	339.078	0
4.98245e+06	992.86	889.6	-3.98	-15.7172	340.049	0
4.98245e+06	992.83	895.7	-4.01	-15.8249	341.018	0
4.98246e+06	992.8	901.8	-4.04	-15.9327	342.1	0
4.98246e+06	992.78	907.8	-4.06	-16.0387	343.069	0
4.98247e+06	992.75	913.9	-4.09	-16.1465	344.037	0
4.98248e+06	992.72	919.9	-4.12	-16.2525	345.007	0
4982483	992.71	926	-4.13	-16.3603	346.092	0
4982489	992.69	932	-4.15	-16.4663	347.064	0
4982495	992.65	938	-4.19	-16.5723	348.036	0
4.9825e+06	992.63	944.1	-4.21	-16.68	349.12	0
4982507	992.61	950	-4.23	-16.7843	350.091	0
4982513	992.61	956	-4.23	-16.8903	351.068	0
4982519	992.58	962	-4.26	-16.9963	352.037	0
4.98253e+06	992.54	968.1	-4.3	-17.1041	353.12	0
4982531	992.53	974	-4.31	-17.2083	354.09	0
4.98254e+06	992.49	979.9	-4.35	-17.3125	355.06	0
4.98254e+06	992.46	985.9	-4.38	-17.4185	356.031	0
4.98255e+06	992.44	991.8	-4.4	-17.5228	357.114	0
4.98255e+06	992.4	997.8	-4.44	-17.6288	358.081	0
4.98256e+06	992.39	1003.7	-4.45	-17.733	359.051	0
4.98257e+06	992.35	1009.5	-4.49	-17.8355	360.027	0
4.98257e+06	992.32	1015.4	-4.52	-17.9397	361.109	0
4.98258e+06	992.29	1021.3	-4.55	-18.044	362.078	0
4.98258e+06	992.25	1027.2	-4.59	-18.1482	363.05	0
4.98259e+06	992.23	1033.1	-4.61	-18.2525	364.137	0
4.9826e+06	992.21	1038.9	-4.63	-18.3549	365.109	0
4.9826e+06	992.21	1044.8	-4.63	-18.4592	366.078	0
4.98261e+06	992.2	1050.6	-4.64	-18.5616	367.049	0
4.98261e+06	992.17	1056.5	-4.67	-18.6659	368.137	0
4.98262e+06	992.16	1062.2	-4.68	-18.7666	369.109	0
4.98263e+06	992.16	1068.1	-4.68	-18.8708	370.079	0
4.98263e+06	992.14	1073.9	-4.7	-18.9733	371.049	0
4.98264e+06	992.1	1079.6	-4.74	-19.074	372.137	0
4.98264e+06	992.09	1085.4	-4.75	-19.1765	373.109	0
4.98265e+06	992.03	1091.1	-4.81	-19.2772	374.079	0
4.98265e+06	991.98	1096.9	-4.86	-19.3797	375.05	0
4.98266e+06	991.97	1102.6	-4.87	-19.4804	376.142	0
4.98267e+06	991.94	1108.4	-4.9	-19.5828	377.111	0
4.98267e+06	991.92	1114.1	-4.92	-19.6835	378.081	0
4.98268e+06	991.92	1119.8	-4.92	-19.7843	379.054	0
4.98268e+06	991.88	1125.6	-4.96	-19.8867	380.142	0
4.98269e+06	991.85	1131.2	-4.99	-19.9857	381.111	0
4.98269e+06	991.84	1136.9	-5	-20.0864	382.081	0
4.9827e+06	991.81	1142.6	-5.03	-20.1871	383.054	0
4.98271e+06	991.79	1148.2	-5.05	-20.286	384.14	0
4.98271e+06	991.76	1153.8	-5.08	-20.3849	385.111	0
4.98272e+06	991.74	1159.5	-5.1	-20.4856	386.081	0
4.98272e+06	991.71	1165.1	-5.13	-20.5846	387.054	0
4.98273e+06	991.69	1170.8	-5.15	-20.6853	388.142	0
4.98273e+06	991.69	1176.3	-5.15	-20.7825	389.11	0
4.98274e+06	991.68	1181.9	-5.16	-20.8814	390.078	0
4.98274e+06	991.65	1187.4	-5.19	-20.9786	391.049	0
4982750	991.62	1193	-5.22	-21.0775	392.133	0
4.98276e+06	991.59	1198.6	-5.25	-21.1765	393.106	0
4.98276e+06	991.59	1204.1	-5.25	-21.2736	394.078	0
4.98277e+06	991.57	1209.6	-5.27	-21.3708	395.162	0
4.98277e+06	991.54	1215.1	-5.3	-21.468	396.133	0
4.98278e+06	991.51	1220.6	-5.33	-21.5651	397.106	0
4.98278e+06	991.49	1226.1	-5.35	-21.6623	398.078	0
4.98279e+06	991.46	1231.6	-5.38	-21.7595	399.162	0
4982794	991.42	1237	-5.42	-21.8549	400.133	0
4.9828e+06	991.4	1242.4	-5.44	-21.9503	401.109	0
4.9828e+06	991.36	1247.9	-5.48	-22.0475	402.079	0
4.98281e+06	991.35	1253.3	-5.49	-22.1429	403.164	0
4.98282e+06	991.31	1258.8	-5.53	-22.2401	404.137	0
4.98282e+06	991.29	1264.1	-5.55	-22.3337	405.11	0
4.98283e+06	991.27	1269.4	-5.57	-22.4273	406.08	0
4.98283e+06	991.25	1274.9	-5.59	-22.5245	407.164	0
4.98284e+06	991.22	1280.3	-5.62	-22.6199	408.137	0
4.98284e+06	991.22	1285.6	-5.62	-22.7135	409.11	0
4.98285e+06	991.22	1290.9	-5.62	-22.8072	410.08	0
4.98285e+06	991.22	1296.2	-5.62	-22.9008	411.164	0
4.98286e+06	991.2	1301.6	-5.64	-22.9962	412.137	0
4.98286e+06	991.19	1306.9	-5.65	-23.0899	413.11	0
4.98287e+06	991.19	1312.1	-5.65	-23.1817	414.08	0
4.98287e+06	991.17	1317.4	-5.67	-23.2754	415.164	0
4.98288e+06	991.15	1322.7	-5.69	-23.369	416.137	0
4.98288e+06	991.09	1327.9	-5.75	-23.4609	417.11	0
4.98289e+06	991.08	1333.1	-5.76	-23.5528	418.08	0
4.9829e+06	991.03	1338.3	-5.81	-23.6446	419.164	0
4.9829e+06	991.01	1343.6	-5.83	-23.7383	420.137	0
4.98291e+06	990.98	1348.8	-5.86	-23.8301	421.11	0
4.98291e+06	990.94	1353.9	-5.9	-23.9202	422.082	0
4.98292e+06	990.94	1359.1	-5.9	-24.0121	423.164	0
4.98292e+06	990.94	1364.3	-5.9	-24.104	424.137	0
4.98293e+06	990.92	1369.4	-5.92	-24.1941	425.11	0
4.98293e+06	990.89	1374.5	-5.95	-24.2842	426.088	0
4.98294e+06	990.86	1379.6	-5.98	-24.3743	427.174	0
4.98294e+06	990.82	1384.8	-6.02	-24.4662	428.143	0
4.98295e+06	990.8	1389.8	-6.04	-24.5545	429.111	0
4.98295e+06	990.82	1394.9	-6.02	-24.6446	430.193	0
4.98296e+06	990.8	1399.9	-6.04	-24.733	431.163	0
4982962	990.77	1405	-6.07	-24.8231	432.134	0
4982967	990.76	1410	-6.08	-24.9114	433.107	0
4982972	990.76	1415	-6.08	-24.9997	434.191	0
4.98298e+06	990.74	1420.1	-6.1	-25.0898	435.162	0
4982982	990.72	1425	-6.12	-25.1764	436.133	0
4982987	990.71	1430	-6.13	-25.2648	437.106	0
4982992	990.69	1435	-6.15	-25.3531	438.19	0
4982997	990.69	1440	-6.15	-25.4414	439.161	0
4.983e+06	990.67	1444.9	-6.17	-25.528	440.133	0
4.98301e+06	990.65	1449.9	-6.19	-25.6163	441.107	0
4.98301e+06	990.63	1454.8	-6.21	-25.7029	442.191	0
4.98302e+06	990.61	1459.7	-6.23	-25.7895	443.163	0
4.98302e+06	990.59	1464.6	-6.25	-25.8761	444.134	0
4.98303e+06	990.55	1469.5	-6.29	-25.9626	445.107	0
4.98303e+06	990.54	1474.3	-6.3	-26.0474	446.192	0
4.98304e+06	990.52	1479.2	-6.32	-26.134	447.162	0
4983041	990.52	1484	-6.32	-26.2188	448.133	0
4.98305e+06	990.5	1488.8	-6.34	-26.3036	449.106	0
4.98305e+06	990.49	1493.6	-6.35	-26.3884	450.192	0
4.98306e+06	990.46	1498.4	-6.38	-26.4732	451.164	0
4.98306e+06	990.44	1503.2	-6.4	-26.558	452.135	0
4983065	990.44	1508	-6.4	-26.6428	453.108	0
4.98307e+06	990.44	1512.7	-6.4	-26.7259	454.192	0
4.98307e+06	990.42	1517.5	-6.42	-26.8107	455.162	0
4.98308e+06	990.39	1522.3	-6.45	-26.8955	456.133	0
4983084	990.38	1527	-6.46	-26.9785	457.108	0
4.98309e+06	990.37	1531.6	-6.47	-27.0598	458.192	0
4.98309e+06	990.34	1536.3	-6.5	-27.1428	459.162	0
4983098	990.33	1541	-6.51	-27.2259	460.133	0
4.9831e+06	990.31	1545.6	-6.53	-27.3071	461.221	0
4.98311e+06	990.27	1550.3	-6.57	-27.3902	462.192	0
4983112	990.26	1555	-6.58	-27.4732	463.162	0
4.98312e+06	990.24	1559.6	-6.6	-27.5545	464.133	0
4.98312e+06	990.24	1564.2	-6.6	-27.6358	465.221	0
4.98313e+06	990.21	1568.9	-6.63	-27.7188	466.192	0
4.98313e+06	990.21	1573.4	-6.63	-27.7983	467.162	0
4983135	990.21	1578	-6.63	-27.8796	468.133	0
4.98314e+06	990.18	1582.5	-6.66	-27.9591	469.221	0
4.98314e+06	990.19	1587.1	-6.65	-28.0403	470.192	0
4.98315e+06	990.17	1591.6	-6.67	-28.1198	471.162	0
4.98315e+06	990.13	1596.1	-6.71	-28.1993	472.133	0
4.98316e+06	990.12	1600.6	-6.72	-28.2789	473.221	0
4.98316e+06	990.12	1605.1	-6.72	-28.3584	474.192	0
4.98317e+06	990.11	1609.6	-6.73	-28.4379	475.162	0
4983171	990.09	1614	-6.75	-28.5156	476.133	0
4.98318e+06	990.09	1618.5	-6.75	-28.5951	477.221	0
4983180	990.08	1623	-6.76	-28.6746	478.192	0
4.98318e+06	990.07	1627.4	-6.77	-28.7523	479.162	0
4.98319e+06	990.06	1631.9	-6.78	-28.8319	480.133	0
4.98319e+06	990.04	1636.3	-6.8	-28.9096	481.221	0
4.9832e+06	990.03	1640.7	-6.81	-28.9873	482.192	0
4983202	990.03	1645	-6.81	-29.0633	483.162	0
4.98321e+06	990.01	1649.3	-6.83	-29.1393	484.136	0
4.98321e+06	990.01	1653.8	-6.83	-29.2188	485.224	0
4983215	989.98	1658	-6.86	-29.293	486.195	0
4.98322e+06	989.98	1662.3	-6.86	-29.369	487.164	0
4.98322e+06	989.96	1666.8	-6.88	-29.4485	488.139	0
4983228	989.94	1671	-6.9	-29.5227	489.225	0
4.98323e+06	989.93	1675.3	-6.91	-29.5986	490.194	0
4.98324e+06	989.92	1679.6	-6.92	-29.6746	491.164	0
4.98324e+06	989.89	1683.8	-6.95	-29.7488	492.137	0
4983245	989.87	1688	-6.97	-29.823	493.225	0
4.98325e+06	989.87	1692.3	-6.97	-29.899	494.194	0
4.98325e+06	989.86	1696.4	-6.98	-29.9714	495.164	0
4.98326e+06	989.86	1700.7	-6.98	-30.0474	496.25	0
4.98326e+06	989.84	1704.9	-7	-30.1216	497.223	0
4983266	989.84	1709	-7	-30.194	498.194	0
4.98327e+06	989.82	1713.2	-7.02	-30.2682	499.164	0
4.98327e+06	989.81	1717.3	-7.03	-30.3407	500.25	0
4.98328e+06	989.77	1721.6	-7.07	-30.4167	501.227	0
4.98328e+06	989.74	1725.6	-7.1	-30.4873	502.198	0
4.98329e+06	989.73	1729.7	-7.11	-30.5598	503.17	0
4.98329e+06	989.73	1733.9	-7.11	-30.634	504.258	0
4.98329e+06	989.71	1737.9	-7.13	-30.7046	505.231	0
4983299	989.7	1742	-7.14	-30.7771	506.203	0
4983303	989.68	1746	-7.16	-30.8477	507.174	0
4.98331e+06	989.67	1750.1	-7.17	-30.9202	508.262	0
4.98331e+06	989.65	1754.1	-7.19	-30.9908	509.235	0
4.98332e+06	989.66	1758.1	-7.18	-31.0615	510.205	0
4.98332e+06	989.66	1762.1	-7.18	-31.1322	511.176	0
4.98332e+06	989.62	1766.1	-7.22	-31.2029	512.264	0
4983327	989.62	1770	-7.22	-31.2718	513.235	0
4983331	989.62	1774	-7.22	-31.3424	514.205	0
4.98333e+06	989.6	1777.9	-7.24	-31.4113	515.176	0
4.98334e+06	989.58	1781.9	-7.26	-31.482	516.264	0
4.98334e+06	989.57	1785.8	-7.27	-31.5509	517.235	0
4.98335e+06	989.56	1789.6	-7.28	-31.6181	518.205	0
4.98335e+06	989.55	1793.6	-7.29	-31.6887	519.176	0
4.98335e+06	989.54	1797.4	-7.3	-31.7558	520.264	0
4.98336e+06	989.52	1801.3	-7.32	-31.8248	521.235	0
4.98336e+06	989.52	1805.1	-7.32	-31.8919	522.205	0
4.98337e+06	989.52	1808.9	-7.32	-31.959	523.176	0
4.98337e+06	989.49	1812.8	-7.35	-32.0279	524.264	0
4.98337e+06	989.48	1816.6	-7.36	-32.0951	525.235	0
4.98338e+06	989.48	1820.4	-7.36	-32.1622	526.205	0
4.98338e+06	989.45	1824.3	-7.39	-32.2311	527.176	0
4.98338e+06	989.46	1827.9	-7.38	-32.2947	528.264	0
4.98339e+06	989.45	1831.8	-7.39	-32.3636	529.235	0
4.98339e+06	989.45	1835.4	-7.39	-32.4272	530.205	0
4.9834e+06	989.44	1839.2	-7.4	-32.4944	531.176	0
4.9834e+06	989.43	1842.9	-7.41	-32.5597	532.262	0
4.9834e+06	989.43	1846.6	-7.41	-32.6251	533.233	0
4.98341e+06	989.4	1850.4	-7.44	-32.6922	534.204	0
4983411	989.39	1854	-7.45	-32.7558	535.175	0
4.98341e+06	989.38	1857.8	-7.46	-32.823	536.263	0
4.98342e+06	989.38	1861.3	-7.46	-32.8848	537.234	0
4983422	989.37	1865	-7.47	-32.9502	538.204	0
4.98343e+06	989.35	1868.6	-7.49	-33.0138	539.288	0
4.98343e+06	989.35	1872.2	-7.49	-33.0774	540.257	0
4.98343e+06	989.35	1875.8	-7.49	-33.141	541.226	0
4.98344e+06	989.33	1879.4	-7.51	-33.2046	542.195	0
4983440	989.31	1883	-7.53	-33.2682	543.277	0
4.98344e+06	989.29	1886.6	-7.55	-33.3318	544.245	0
4.98345e+06	989.29	1890.1	-7.55	-33.3937	545.216	0
4.98345e+06	989.29	1893.5	-7.55	-33.4537	546.185	0
4.98345e+06	989.29	1897.1	-7.55	-33.5173	547.267	0
4.98346e+06	989.26	1900.6	-7.58	-33.5792	548.236	0
4.98346e+06	989.26	1904.1	-7.58	-33.641	549.204	0
4.98346e+06	989.24	1907.6	-7.6	-33.7028	550.288	0
4983468	989.21	1911	-7.63	-33.7629	551.267	0
4.98347e+06	989.2	1914.4	-7.64	-33.823	552.236	0
4.98347e+06	989.19	1917.9	-7.65	-33.8848	553.206	0
4.98348e+06	989.16	1921.3	-7.68	-33.9449	554.292	0
4.98348e+06	989.16	1924.7	-7.68	-34.005	555.265	0
4.98349e+06	989.16	1928.1	-7.68	-34.065	556.236	0
4.98349e+06	989.15	1931.5	-7.69	-34.1251	557.206	0
4.98349e+06	989.14	1934.8	-7.7	-34.1834	558.292	0
4.9835e+06	989.14	1938.1	-7.7	-34.2417	559.265	0
4.9835e+06	989.12	1941.5	-7.72	-34.3018	560.236	0
4.9835e+06	989.11	1944.8	-7.73	-34.3601	561.206	0
4.98351e+06	989.11	1948.1	-7.73	-34.4184	562.292	0
4.98351e+06	989.12	1951.4	-7.72	-34.4767	563.265	0
4.98351e+06	989.1	1954.7	-7.74	-34.535	564.236	0
4983515	989.11	1958	-7.73	-34.5933	565.206	0
4.98352e+06	989.12	1961.2	-7.72	-34.6498	566.292	0
4.98352e+06	989.13	1964.4	-7.71	-34.7064	567.265	0
4.98352e+06	989.13	1967.7	-7.71	-34.7647	568.236	0
4.98353e+06	989.11	1970.9	-7.73	-34.8212	569.21	0
4.98353e+06	989.11	1974.1	-7.73	-34.8777	570.298	0
4.98353e+06	989.11	1977.3	-7.73	-34.9343	571.269	0
4.98354e+06	989.12	1980.4	-7.72	-34.989	572.24	0
4.98354e+06	989.08	1983.5	-7.76	-35.0438	573.214	0
4.98354e+06	989.26	1986.1	-7.58	-35.0897	574.3	0
4.98354e+06	990.4	1987.9	-6.44	-35.1215	575.273	0
4.98355e+06	989.35	1991.1	-7.49	-35.1781	576.245	0
4.98355e+06	988.87	1994.4	-7.97	-35.2364	577.218	0
4.98355e+06	988.88	1997.4	-7.96	-35.2894	578.307	0
4.98356e+06	989.18	2000.6	-7.66	-35.3459	579.278	0
4.98356e+06	989.25	2003.6	-7.59	-35.3989	580.246	0
4.98356e+06	989.25	2006.7	-7.59	-35.4537	581.221	0
4.98357e+06	989.25	2009.8	-7.59	-35.5085	582.307	0
4.98357e+06	989.26	2012.8	-7.58	-35.5615	583.278	0
4.98357e+06	989.27	2015.9	-7.57	-35.6162	584.246	0
4.98358e+06	989.27	2018.8	-7.57	-35.6675	585.33	0
4.98358e+06	989.27	2021.9	-7.57	-35.7222	586.301	0
4.98358e+06	989.28	2024.8	-7.56	-35.7735	587.274	0
4.98358e+06	989.29	2027.7	-7.55	-35.8247	588.246	0
4.98359e+06	989.3	2030.6	-7.54	-35.876	589.33	0
4.98359e+06	989.31	2033.4	-7.53	-35.9254	590.301	0
4.98359e+06	989.31	2036.3	-7.53	-35.9767	591.274	0
4983596	989.32	2039	-7.52	-36.0244	592.246	0
4.9836e+06	989.33	2041.8	-7.51	-36.0738	593.33	0
4.9836e+06	989.34	2044.5	-7.5	-36.1215	594.301	0
4.9836e+06	989.34	2047.2	-7.5	-36.1692	595.275	0
4.98361e+06	989.33	2049.9	-7.51	-36.2169	596.245	0
4.98361e+06	989.35	2052.5	-7.49	-36.2629	597.329	0
4.98361e+06	989.39	2055.1	-7.45	-36.3088	598.3	0
4.98361e+06	989.37	2057.6	-7.47	-36.353	599.273	0
4.98362e+06	989.37	2060.1	-7.47	-36.3972	600.245	0
4.98362e+06	989.37	2062.6	-7.47	-36.4413	601.339	0
4.98362e+06	989.36	2064.9	-7.48	-36.4819	602.31	0
4.98362e+06	989.01	2067.3	-7.83	-36.5244	603.281	0
4.98363e+06	988.98	2069.6	-7.86	-36.565	604.251	0
4.98363e+06	988.99	2071.8	-7.85	-36.6039	605.339	0
4983631	988.98	2074	-7.86	-36.6427	606.31	0
4.98363e+06	988.97	2076.1	-7.87	-36.6798	607.281	0
4.98364e+06	988.97	2078.4	-7.87	-36.7205	608.251	0
4.98364e+06	988.98	2080.5	-7.86	-36.7576	609.339	0
4.98364e+06	988.99	2082.6	-7.85	-36.7947	610.31	0
4.98364e+06	989	2084.5	-7.84	-36.8282	611.281	0
4.98364e+06	989.02	2086.5	-7.82	-36.8636	612.251	0
4.98365e+06	991.89	2088.6	-4.95	-36.9007	613.339	0
4.98365e+06	990.71	2089.8	-6.13	-36.9219	614.31	0
4.98365e+06	990.71	2091.6	-6.13	-36.9537	615.281	0
4.98365e+06	990.61	2093.4	-6.23	-36.9855	616.253	0
4.98365e+06	990.57	2095.3	-6.27	-37.0191	617.341	0
4.98365e+06	990.58	2096.9	-6.26	-37.0473	618.314	0
4.98366e+06	990.6	2098.6	-6.24	-37.0774	619.286	0
4.98366e+06	990.61	2100.3	-6.23	-37.1074	620.257	0
4983659	990.63	2102	-6.21	-37.1374	621.343	0
4.98366e+06	990.64	2103.8	-6.2	-37.1692	622.316	0
4.98366e+06	990.66	2105.4	-6.18	-37.1975	623.288	0
4.98366e+06	990.68	2107.2	-6.16	-37.2293	624.261	0
4983666	990.69	2109	-6.15	-37.2611	625.349	0
4.98367e+06	990.71	2110.8	-6.13	-37.2929	626.32	0
4.98367e+06	990.7	2112.6	-6.14	-37.3247	627.288	0
4.98367e+06	990.7	2114.6	-6.14	-37.36	628.259	0
4.98367e+06	990.72	2116.4	-6.12	-37.3918	629.347	0
4.98368e+06	990.72	2118.5	-6.12	-37.4289	630.318	0
4.98368e+06	990.72	2120.6	-6.12	-37.466	631.288	0
4.98368e+06	990.71	2122.8	-6.13	-37.5049	632.372	0
4.98368e+06	990.7	2124.9	-6.14	-37.542	633.343	0
4.98368e+06	990.68	2127.3	-6.16	-37.5844	634.316	0
4.98369e+06	990.67	2129.5	-6.17	-37.6233	635.288	0
4.98369e+06	990.66	2131.9	-6.18	-37.6657	636.372	0
4.98369e+06	990.65	2134.4	-6.19	-37.7099	637.343	0
4983694	990.63	2137	-6.21	-37.7558	638.316	0
4.9837e+06	990.61	2139.6	-6.23	-37.8017	639.288	0
4.9837e+06	990.59	2142.3	-6.25	-37.8494	640.372	0
4.9837e+06	990.58	2145.1	-6.26	-37.8989	641.343	0
4.9837e+06	990.57	2147.9	-6.27	-37.9484	642.316	0
4.98371e+06	990.57	2150.8	-6.27	-37.9996	643.288	0
4.98371e+06	990.54	2153.8	-6.3	-38.0526	644.372	0
4.98371e+06	990.52	2156.9	-6.32	-38.1074	645.343	0
4.98372e+06	990.49	2159.9	-6.35	-38.1604	646.316	0
4.98372e+06	990.47	2163.1	-6.37	-38.2169	647.288	0
4.98372e+06	990.46	2166.3	-6.38	-38.2734	648.372	0
4.98373e+06	990.43	2169.8	-6.41	-38.3353	649.343	0
4983730	990.4	2173	-6.44	-38.3918	650.316	0
4.98373e+06	990.38	2176.6	-6.46	-38.4554	651.292	0
4.98374e+06	990.35	2180.1	-6.49	-38.5173	652.38	0
4.98374e+06	990.34	2183.6	-6.5	-38.5791	653.351	0
4.98374e+06	990.3	2187.3	-6.54	-38.6445	654.32	0
4983748	990.29	2191	-6.55	-38.7099	655.288	0
4.98375e+06	990.27	2194.7	-6.57	-38.7752	656.372	0
4.98376e+06	990.25	2198.5	-6.59	-38.8424	657.346	0
4.98376e+06	990.25	2202.4	-6.59	-38.9113	658.317	0
4.98376e+06	990.23	2206.3	-6.61	-38.9802	659.287	0
4.98377e+06	990.21	2210.3	-6.63	-39.0508	660.371	0
4.98377e+06	990.19	2214.3	-6.65	-39.1215	661.342	0
4.98378e+06	990.16	2218.4	-6.68	-39.1939	662.315	0
4.98378e+06	990.14	2222.6	-6.7	-39.2681	663.401	0
4.98378e+06	990.11	2226.7	-6.73	-39.3406	664.371	0
4983788	990.08	2231	-6.76	-39.4166	665.342	0
4.98379e+06	990.07	2235.3	-6.77	-39.4925	666.315	0
4.9838e+06	990.05	2239.7	-6.79	-39.5703	667.399	0
4.9838e+06	990.04	2244.1	-6.8	-39.648	668.301	0
4.98381e+06	990.01	2248.5	-6.83	-39.7257	669.387	0
4983810	989.99	2253	-6.85	-39.8052	670.358	0
4.98381e+06	989.96	2257.5	-6.88	-39.8847	671.328	0
4.98382e+06	989.96	2262.2	-6.88	-39.9678	672.299	0
4.98382e+06	989.9	2266.9	-6.94	-40.0508	673.383	0
4.98383e+06	989.9	2271.6	-6.94	-40.1339	674.352	0
4.98383e+06	989.88	2276.3	-6.96	-40.2169	675.319	0
4.98384e+06	989.86	2281.1	-6.98	-40.3017	676.399	0
4.98384e+06	989.83	2285.9	-7.01	-40.3865	677.371	0
4.98385e+06	989.83	2290.8	-7.01	-40.4731	678.342	0
4.98385e+06	989.8	2295.8	-7.04	-40.5614	679.315	0
4.98386e+06	989.77	2300.8	-7.07	-40.6497	680.401	0
4.98386e+06	989.74	2305.8	-7.1	-40.7381	681.371	0
4.98387e+06	989.71	2310.9	-7.13	-40.8282	682.342	0
4.98387e+06	989.69	2316.2	-7.15	-40.9218	683.315	0
4.98388e+06	989.66	2321.4	-7.18	-41.0137	684.401	0
4.98388e+06	989.62	2326.9	-7.22	-41.1109	685.371	0
4.98389e+06	989.61	2332.4	-7.23	-41.2081	686.342	0
4983895	989.61	2338	-7.23	-41.307	687.317	0
4.9839e+06	989.58	2343.8	-7.26	-41.4095	688.401	0
4.98391e+06	989.55	2349.6	-7.29	-41.5119	689.371	0
4.98391e+06	989.5	2355.6	-7.34	-41.6179	690.342	0
4.98392e+06	989.47	2361.7	-7.37	-41.7257	691.317	0
4.98392e+06	989.43	2367.9	-7.41	-41.8353	692.401	0
4.98393e+06	989.39	2374.1	-7.45	-41.9448	693.371	0
4.98394e+06	989.35	2380.6	-7.49	-42.0596	694.342	0
4.98394e+06	989.32	2387.1	-7.52	-42.1745	695.43	0
4.98395e+06	989.27	2393.8	-7.57	-42.2929	696.401	0
4.98396e+06	989.24	2400.5	-7.6	-42.4112	697.371	0
4.98396e+06	989.19	2407.3	-7.65	-42.5314	698.342	0
4.98397e+06	989.16	2414.3	-7.68	-42.655	699.43	0
4.98398e+06	989.14	2421.2	-7.7	-42.7769	700.401	0
4.98399e+06	989.11	2428.4	-7.73	-42.9042	701.379	0
4.98399e+06	989.11	2435.5	-7.73	-43.0296	702.35	0
4.984e+06	989.11	2442.8	-7.73	-43.1586	703.434	0
4.98401e+06	989.1	2450.1	-7.74	-43.2875	704.403	0
4.98401e+06	989.12	2457.4	-7.72	-43.4165	705.372	0
4.98402e+06	989.12	2464.9	-7.72	-43.549	706.343	0
4.98403e+06	989.13	2472.4	-7.71	-43.6815	707.431	0
4.98404e+06	989.17	2479.9	-7.67	-43.814	708.402	0
4.98404e+06	989.18	2487.6	-7.66	-43.9501	709.372	0
4.98405e+06	989.22	2495.1	-7.62	-44.0826	710.343	0
4.98406e+06	989.23	2502.9	-7.61	-44.2204	711.431	0
4.98407e+06	989.23	2510.6	-7.61	-44.3564	712.402	0
4.98408e+06	989.22	2518.4	-7.62	-44.4942	713.372	0
4.98408e+06	989.17	2526.2	-7.67	-44.632	714.343	0
4984091	989.14	2534	-7.7	-44.7698	715.431	0
4984099	989.12	2542	-7.72	-44.9112	716.402	0
4.98411e+06	989.12	2549.9	-7.72	-45.0508	717.372	0
4.98411e+06	989.02	2557.9	-7.82	-45.1921	718.345	0
4.98412e+06	988.91	2565.8	-7.93	-45.3317	719.433	0
4.98413e+06	988.81	2573.8	-8.03	-45.473	720.402	0
4.98414e+06	988.74	2581.9	-8.1	-45.6161	721.372	0
4.98415e+06	988.72	2589.8	-8.12	-45.7557	722.343	0
4.98415e+06	988.72	2597.9	-8.12	-45.8988	723.431	0
4984163	988.75	2606	-8.09	-46.0419	724.402	0
4.98417e+06	988.77	2614.1	-8.07	-46.185	725.372	0
4.98418e+06	988.76	2622.3	-8.08	-46.3299	726.456	0
4.98419e+06	988.74	2630.4	-8.1	-46.473	727.429	0
4.9842e+06	988.69	2638.6	-8.15	-46.6179	728.402	0
4.9842e+06	988.66	2646.7	-8.18	-46.761	729.372	0
4.98421e+06	988.65	2654.9	-8.19	-46.9059	730.456	0
4984220	988.64	2663	-8.2	-47.049	731.429	0
4.98423e+06	988.64	2671.2	-8.2	-47.1939	732.402	0
4.98424e+06	988.62	2679.4	-8.22	-47.3387	733.372	0
4.98424e+06	988.56	2687.7	-8.28	-47.4854	734.456	0
4.98425e+06	988.49	2695.9	-8.35	-47.6302	735.429	0
4.98426e+06	988.45	2704.1	-8.39	-47.7751	736.402	0
4.98427e+06	988.41	2712.4	-8.43	-47.9218	737.372	0
4.98428e+06	988.34	2720.6	-8.5	-48.0666	738.456	0
4.98429e+06	988.29	2728.9	-8.55	-48.2133	739.429	0
4.98429e+06	988.24	2737.1	-8.6	-48.3582	740.402	0
4.9843e+06	988.2	2745.5	-8.64	-48.5066	741.372	0
4.98431e+06	988.18	2753.8	-8.66	-48.6532	742.456	0
4.98432e+06	988.16	2761.9	-8.68	-48.7963	743.429	0
4.98433e+06	988.14	2770.3	-8.7	-48.9447	744.402	0
4.98434e+06	988.13	2778.4	-8.71	-49.0878	745.372	0
4.98434e+06	988.13	2786.8	-8.71	-49.2362	746.456	0
4984352	988.13	2795	-8.71	-49.3811	747.429	0
4.98436e+06	988.12	2803.3	-8.72	-49.5277	748.402	0
4.98437e+06	988.11	2811.7	-8.73	-49.6762	749.372	0
4.98438e+06	988.1	2819.9	-8.74	-49.821	750.456	0
4.98439e+06	988.06	2828.2	-8.78	-49.9677	751.435	0
4.98439e+06	988.06	2836.5	-8.78	-50.1143	752.406	0
4.9844e+06	988.05	2844.8	-8.79	-50.261	753.376	0
4984410	988.02	2853	-8.82	-50.4058	754.464	0
4.98442e+06	987.97	2861.3	-8.87	-50.5525	755.435	0
4.98443e+06	987.94	2869.5	-8.9	-50.6974	756.409	0
4.98443e+06	987.92	2877.8	-8.92	-50.844	757.381	0
4984443	987.88	2886	-8.96	-50.9889	758.467	0
4.98445e+06	987.86	2894.3	-8.98	-51.1355	759.44	0
4.98446e+06	987.83	2902.6	-9.01	-51.2822	760.412	0
4.98447e+06	987.83	2910.8	-9.01	-51.427	761.383	0
4984476	987.79	2919	-9.05	-51.5719	762.471	0
4.98448e+06	987.76	2927.1	-9.08	-51.715	763.442	0
4.98449e+06	987.74	2935.4	-9.1	-51.8616	764.412	0
4.9845e+06	987.71	2943.6	-9.13	-52.0065	765.387	0
4.98451e+06	987.68	2951.8	-9.16	-52.1514	766.474	0
4984517	987.66	2960	-9.18	-52.2963	767.445	0
4.98453e+06	987.61	2968.1	-9.23	-52.4394	768.413	0
4.98453e+06	987.57	2976.3	-9.27	-52.5843	769.384	0
4.98454e+06	987.56	2984.4	-9.28	-52.7274	770.472	0
4.98455e+06	987.53	2992.7	-9.31	-52.874	771.443	0
4.98456e+06	987.49	3000.9	-9.35	-53.0189	772.413	0
4.98457e+06	987.46	3008.9	-9.38	-53.1602	773.497	0
4.98457e+06	987.43	3017.1	-9.41	-53.3051	774.468	0
4.98458e+06	987.4	3025.2	-9.44	-53.4482	775.441	0
4.98459e+06	987.4	3033.3	-9.44	-53.5913	776.413	0
4.9846e+06	987.37	3041.4	-9.47	-53.7344	777.497	0
4.98461e+06	987.36	3049.5	-9.48	-53.8775	778.468	0
4.98461e+06	987.32	3057.6	-9.52	-54.0206	779.441	0
4.98462e+06	987.29	3065.6	-9.55	-54.162	780.413	0
4.98463e+06	987.29	3073.7	-9.55	-54.3051	781.497	0
4.98464e+06	987.26	3081.8	-9.58	-54.4482	782.468	0
4.98465e+06	987.24	3089.8	-9.6	-54.5895	783.441	0
4.98465e+06	987.2	3097.8	-9.64	-54.7309	784.413	0
4.98466e+06	987.15	3105.8	-9.69	-54.8722	785.497	0
4.98467e+06	987.15	3113.8	-9.69	-55.0136	786.468	0
4.98468e+06	987.13	3121.8	-9.71	-55.1549	787.441	0
4.98469e+06	987.09	3129.8	-9.75	-55.2963	788.413	0
4.98469e+06	987.07	3137.8	-9.77	-55.4376	789.497	0
4.9847e+06	987.07	3145.7	-9.77	-55.5772	790.468	0
4.98471e+06	987.03	3153.7	-9.81	-55.7185	791.441	0
4.98472e+06	987	3161.6	-9.84	-55.8581	792.413	0
4.98473e+06	986.94	3169.6	-9.9	-55.9994	793.497	0
4.98473e+06	986.91	3177.4	-9.93	-56.1372	794.471	0
4.98474e+06	986.89	3185.4	-9.95	-56.2786	795.442	0
4.98475e+06	986.86	3193.3	-9.98	-56.4181	796.412	0
4.98476e+06	986.83	3201.2	-10.01	-56.5577	797.496	0
4984766	986.82	3209	-10.02	-56.6955	798.467	0
4984774	986.78	3217	-10.06	-56.8369	799.44	0
4.98478e+06	986.76	3224.8	-10.08	-56.9747	800.412	0
4.98479e+06	986.73	3232.6	-10.11	-57.1125	801.506	0
4.9848e+06	986.69	3240.4	-10.15	-57.2503	802.477	0
4.98481e+06	986.67	3248.2	-10.17	-57.3881	803.448	0
4984813	986.67	3256	-10.17	-57.5259	804.42	0
4.98482e+06	986.62	3263.9	-10.22	-57.6655	805.51	0
4.98483e+06	986.62	3271.6	-10.22	-57.8015	806.483	0
4.98484e+06	986.59	3279.3	-10.25	-57.9376	807.453	0
4.98484e+06	986.58	3287.1	-10.26	-58.0754	808.424	0
4.98485e+06	986.56	3294.8	-10.28	-58.2114	809.512	0
4.98486e+06	986.54	3302.5	-10.3	-58.3475	810.485	0
4.98487e+06	986.5	3310.1	-10.34	-58.4817	811.455	0
4.98487e+06	986.49	3317.9	-10.35	-58.6195	812.428	0
4.98488e+06	986.47	3325.6	-10.37	-58.7556	813.516	0
4.98489e+06	986.44	3333.2	-10.4	-58.8899	814.485	0
4.9849e+06	986.41	3340.9	-10.43	-59.0259	815.455	0
4.98491e+06	986.41	3348.5	-10.43	-59.1602	816.426	0
4.98491e+06	986.37	3356.1	-10.47	-59.2944	817.514	0
4.98492e+06	986.37	3363.6	-10.47	-59.4269	818.485	0
4.98493e+06	986.37	3371.3	-10.47	-59.563	819.455	0
4.98494e+06	986.35	3378.9	-10.49	-59.6973	820.539	0
4.98494e+06	986.33	3386.4	-10.51	-59.8298	821.512	0
4.98495e+06	986.33	3393.9	-10.51	-59.9623	822.485	0
4.98496e+06	986.32	3401.5	-10.52	-60.0966	823.455	0
4984966	986.32	3409	-10.52	-60.2291	824.539	0
4.98497e+06	986.3	3416.5	-10.54	-60.3616	825.512	0
4984981	986.28	3424	-10.56	-60.4941	826.485	0
4.98499e+06	986.26	3431.5	-10.58	-60.6266	827.455	0
4984996	986.23	3439	-10.61	-60.7591	828.539	0
4.985e+06	986.22	3446.3	-10.62	-60.8881	829.512	0
4.98501e+06	986.21	3453.8	-10.63	-61.0206	830.484	0
4.98502e+06	986.19	3461.2	-10.65	-61.1513	831.454	0
4.98503e+06	986.18	3468.6	-10.66	-61.282	832.538	0
4985033	986.15	3476	-10.69	-61.4128	833.509	0
4.98504e+06	986.15	3483.4	-10.69	-61.5435	834.482	0
4.98505e+06	986.16	3490.8	-10.68	-61.6743	835.454	0
4985055	986.12	3498	-10.72	-61.8015	836.538	0
4.98506e+06	986.11	3505.4	-10.73	-61.9322	837.509	0
4.98507e+06	986.1	3512.7	-10.74	-62.0612	838.482	0
4985077	986.1	3520	-10.74	-62.1902	839.454	0
4.98508e+06	986.07	3527.3	-10.77	-62.3191	840.538	0
4.98509e+06	986.05	3534.5	-10.79	-62.4464	841.509	0
4.9851e+06	986.03	3541.8	-10.81	-62.5753	842.482	0
4.98511e+06	986.02	3548.9	-10.82	-62.7008	843.454	0
4.98511e+06	986.01	3556.1	-10.83	-62.828	844.538	0
4.98512e+06	986.01	3563.3	-10.83	-62.9552	845.509	0
4.98513e+06	985.99	3570.4	-10.85	-63.0806	846.482	0
4.98513e+06	985.99	3577.6	-10.85	-63.2078	847.453	0
4.98514e+06	985.97	3584.6	-10.87	-63.3315	848.537	0
4.98515e+06	985.97	3591.8	-10.87	-63.4587	849.508	0
4.98516e+06	985.96	3598.9	-10.88	-63.5842	850.481	0
4.98516e+06	985.94	3605.9	-10.9	-63.7078	851.457	0
4985170	985.92	3613	-10.92	-63.8333	852.545	0
4985177	985.91	3620	-10.93	-63.9569	853.518	0
4985184	985.92	3627	-10.92	-64.0806	854.489	0
4.98519e+06	985.92	3633.9	-10.92	-64.2025	855.461	0
4.9852e+06	985.91	3640.9	-10.93	-64.3262	856.549	0
4.9852e+06	985.92	3647.9	-10.92	-64.4499	857.522	0
4.98521e+06	985.91	3654.8	-10.93	-64.5718	858.494	0
4.98522e+06	985.91	3661.8	-10.93	-64.6954	859.469	0
4.98523e+06	985.91	3668.6	-10.93	-64.8156	860.557	0
4.98523e+06	985.92	3675.4	-10.92	-64.9357	861.528	0
4.98524e+06	985.93	3682.4	-10.91	-65.0594	862.496	0
4.98525e+06	985.93	3689.2	-10.91	-65.1795	863.467	0
4985253	985.93	3696	-10.91	-65.2997	864.555	0
4.98526e+06	985.94	3702.9	-10.9	-65.4216	865.526	0
4.98527e+06	985.95	3709.6	-10.89	-65.54	866.496	0
4.98527e+06	985.96	3716.5	-10.88	-65.6619	867.58	0
4.98528e+06	985.99	3723.3	-10.85	-65.782	868.551	0
4985287	986	3730	-10.84	-65.9004	869.524	0
4.98529e+06	985.99	3736.8	-10.85	-66.0205	870.496	0
4.9853e+06	986.01	3743.5	-10.83	-66.1389	871.58	0
4.98531e+06	986.01	3750.1	-10.83	-66.2555	872.551	0
4.98531e+06	986.04	3756.8	-10.8	-66.3739	873.524	0
4.98532e+06	986.04	3763.5	-10.8	-66.4922	874.496	0
4.98533e+06	986.04	3770.1	-10.8	-66.6089	875.58	0
4.98533e+06	986.05	3776.8	-10.79	-66.7272	876.551	0
4.98534e+06	986.06	3783.3	-10.78	-66.8421	877.524	0
4.98535e+06	986.06	3789.9	-10.78	-66.9587	878.496	0
4.98535e+06	986.08	3796.4	-10.76	-67.0735	879.58	0
4985360	986.1	3803	-10.74	-67.1901	880.551	0
4.98537e+06	986.13	3809.4	-10.71	-67.3032	881.524	0
4985373	986.15	3816	-10.69	-67.4198	882.496	0
4.98538e+06	986.18	3822.5	-10.66	-67.5346	883.58	0
4.98539e+06	986.2	3828.9	-10.64	-67.6477	884.551	0
4.98539e+06	986.22	3835.3	-10.62	-67.7608	885.524	0
4.9854e+06	986.23	3841.8	-10.61	-67.8756	886.496	0
4.98541e+06	986.27	3848.1	-10.57	-67.9869	887.58	0
4.98541e+06	986.3	3854.6	-10.54	-68.1018	888.549	0
4.98542e+06	986.32	3860.9	-10.52	-68.2131	889.518	0
4.98542e+06	986.34	3867.3	-10.5	-68.3261	890.6	0
4.98543e+06	986.34	3873.7	-10.5	-68.4392	891.569	0
4.98544e+06	986.37	3879.9	-10.47	-68.5488	892.537	0
4.98544e+06	986.37	3886.2	-10.47	-68.6601	893.508	0
4.98545e+06	986.4	3892.4	-10.44	-68.7696	894.592	0
4.98546e+06	986.45	3898.8	-10.39	-68.8827	895.561	0
4985462	986.49	3905	-10.35	-68.9922	896.528	0
4.98547e+06	986.52	3911.1	-10.32	-69.1	897.496	0
4.98547e+06	986.58	3917.3	-10.26	-69.2095	898.578	0
4.98548e+06	986.62	3923.6	-10.22	-69.3208	899.549	0
4.98549e+06	986.64	3929.8	-10.2	-69.4304	900.518	0
4.98549e+06	986.69	3935.9	-10.15	-69.5382	901.601	0
4.9855e+06	986.74	3941.9	-10.1	-69.6441	902.57	0
4985505	986.78	3948	-10.06	-69.7519	903.538	0
4.98551e+06	986.85	3954.2	-9.99	-69.8615	904.508	0
4.98552e+06	986.91	3960.2	-9.93	-69.9675	905.592	0
4.98552e+06	987.06	3966.3	-9.78	-70.0752	906.558	0
4.98553e+06	987.06	3972.4	-9.78	-70.183	907.527	0
4.98554e+06	987.09	3978.4	-9.75	-70.289	908.611	0
4.98554e+06	987.14	3984.4	-9.7	-70.395	909.581	0
4.98555e+06	987.2	3990.4	-9.64	-70.501	910.554	0
4.98555e+06	987.25	3996.4	-9.59	-70.607	911.529	0
4.98556e+06	987.29	4002.3	-9.55	-70.7113	912.611	0
4.98557e+06	987.33	4008.3	-9.51	-70.8173	913.581	0
4.98557e+06	987.37	4014.2	-9.47	-70.9215	914.554	0
4.98558e+06	987.44	4020.1	-9.4	-71.0258	915.527	0
4985583	987.52	4026	-9.32	-71.13	916.611	0
4.98559e+06	987.58	4031.9	-9.26	-71.2342	917.581	0
4.98559e+06	987.67	4037.8	-9.17	-71.3385	918.554	0
4.9856e+06	987.69	4043.7	-9.15	-71.4427	919.527	0
4.98561e+06	987.76	4049.4	-9.08	-71.5434	920.611	0
4.98561e+06	987.83	4055.3	-9.01	-71.6477	921.581	0
4.98562e+06	987.83	4061.1	-9.01	-71.7501	922.554	0
4.98562e+06	987.9	4066.9	-8.94	-71.8526	923.527	0
4.98563e+06	988	4072.6	-8.84	-71.9533	924.611	0
4.98564e+06	988.09	4078.3	-8.75	-72.054	925.581	0
4985641	988.18	4084	-8.66	-72.1547	926.554	0
4.98565e+06	988.3	4089.6	-8.54	-72.2537	927.529	0
4.98565e+06	988.4	4095.2	-8.44	-72.3526	928.611	0
4.98566e+06	988.49	4100.9	-8.35	-72.4533	929.581	0
4.98566e+06	988.61	4106.5	-8.23	-72.5523	930.554	0
4985669	988.74	4112	-8.1	-72.6494	931.527	0
4.98567e+06	988.82	4117.6	-8.02	-72.7484	932.611	0
4.98568e+06	988.92	4123.2	-7.92	-72.8473	933.581	0
4.98569e+06	989.07	4128.7	-7.77	-72.9445	934.554	0
4.98569e+06	989.21	4133.9	-7.63	-73.0363	935.642	0
4.9857e+06	989.37	4138.9	-7.47	-73.1247	936.611	0
4985701	989.37	4144	-7.47	-73.2148	937.581	0
4.98571e+06	989.5	4149.2	-7.34	-73.3067	938.554	0
4.98571e+06	989.64	4154.4	-7.2	-73.3985	939.642	0
4.98572e+06	989.71	4159.7	-7.13	-73.4922	940.611	0
4985722	989.82	4165	-7.02	-73.5858	941.581	0
4.98573e+06	989.95	4170.2	-6.89	-73.6777	942.554	0
4.98573e+06	990.06	4175.5	-6.78	-73.7713	943.642	0
4.98574e+06	990.15	4180.8	-6.69	-73.865	944.611	0
4.98574e+06	990.26	4186.1	-6.58	-73.9586	945.581	0
4.98575e+06	990.39	4191.4	-6.45	-74.0522	946.554	0
4.98575e+06	990.53	4196.8	-6.31	-74.1476	947.642	0
4985759	990.68	4202	-6.16	-74.2395	948.611	0
4.98576e+06	990.82	4207.2	-6.02	-74.3314	949.581	0
4.98577e+06	990.98	4212.5	-5.86	-74.425	950.554	0
4.98577e+06	991.1	4217.8	-5.74	-74.5187	951.642	0
4.98578e+06	991.1	4223.1	-5.74	-74.6123	952.611	0
4.98579e+06	991.27	4228.4	-5.57	-74.7059	953.581	0
4.98579e+06	991.45	4233.6	-5.39	-74.7978	954.554	0
4.9858e+06	991.59	4238.9	-5.25	-74.8915	955.642	0
4.9858e+06	991.75	4244.1	-5.09	-74.9833	956.611	0
4.98581e+06	991.87	4249.1	-4.97	-75.0717	957.581	0
4.98581e+06	992.02	4254.3	-4.82	-75.1635	958.556	0
4.98582e+06	992.19	4259.4	-4.65	-75.2536	959.642	0
4.98582e+06	992.39	4264.6	-4.45	-75.3455	960.611	0
4.98583e+06	992.52	4269.6	-4.32	-75.4339	961.581	0
4.98583e+06	992.66	4274.8	-4.18	-75.5257	962.554	0
4.98584e+06	992.82	4279.8	-4.02	-75.6141	963.642	0
4.98584e+06	993.09	4284.8	-3.75	-75.7024	964.611	0
4.98585e+06	993.15	4289.8	-3.69	-75.7907	965.581	0
4.98585e+06	993.4	4294.8	-3.44	-75.8791	966.667	0
4.98586e+06	993.4	4299.7	-3.44	-75.9656	967.64	0
4.98586e+06	993.68	4304.7	-3.16	-76.054	968.611	0
4.98587e+06	993.84	4309.6	-3	-76.1406	969.581	0
4.98587e+06	994.14	4314.5	-2.7	-76.2271	970.667	0
4.98588e+06	994.36	4319.5	-2.48	-76.3155	971.64	0
4.98588e+06	994.41	4324.4	-2.43	-76.402	972.611	0
4.98589e+06	994.55	4329.3	-2.29	-76.4886	973.581	0
4.98589e+06	994.68	4334.1	-2.16	-76.5734	974.667	0
4.9859e+06	994.83	4338.9	-2.01	-76.6582	975.64	0
4.9859e+06	995.09	4343.6	-1.75	-76.7412	976.611	0
4.98591e+06	995.48	4348.4	-1.36	-76.8261	977.581	0
4.98591e+06	995.83	4353.3	-1.01	-76.9126	978.667	0
4.98592e+06	995.86	4358.1	-0.98	-76.9974	979.64	0
4.98592e+06	995.97	4362.9	-0.87	-77.0822	980.611	0
4.98592e+06	995.97	4367.6	-0.87	-77.1653	981.581	0
4.98593e+06	996.08	4372.3	-0.76	-77.2483	982.667	0
4.98593e+06	996.22	4377.1	-0.62	-77.3331	983.64	0
4.98594e+06	996.36	4381.7	-0.48	-77.4144	984.611	0
4.98594e+06	996.58	4386.4	-0.26	-77.4974	985.581	0
4985948	996.82	4391	-0.02	-77.5787	986.667	0
4.98595e+06	997.02	4395.6	0.18	-77.66	987.64	0
4.98596e+06	997.28	4400.1	0.44	-77.7395	988.611	0
4.98596e+06	997.53	4404.8	0.69	-77.8225	989.583	0
4.98597e+06	997.61	4409.2	0.77	-77.9002	990.671	0
4.98597e+06	997.9	4413.8	1.06	-77.9815	991.642	0
4.98598e+06	998.26	4418.2	1.42	-78.0593	992.611	0
4.98598e+06	998.58	4422.8	1.74	-78.1405	993.607	0
4.98598e+06	998.94	4426.9	2.1	-78.213	994.693	0
4985984	999.73	4427	2.89	-78.2147	995.663	0
4.98596e+06	999.73	4406.6	2.89	-77.8543	996.634	0
4.98579e+06	1003.4	4236.2	6.56	-74.8438	997.607	0
4.9856e+06	1058.7	4043.9	61.86	-71.4463	998.692	0
4985364	1203.9	3807	207.06	-67.2608	999.663	0
4.98515e+06	1688.4	3592.1	691.56	-63.464	1000.64	0
4.98505e+06	2094.5	3489.2	1097.66	-61.646	1001.61	0
4.98308e+06	2234.6	1521.9	1237.76	-26.8884	1002.7	0
4.9794e+06	2290.9	-2159.3	1294.06	38.1498	1003.67	0
2.58105e+06	3909.2	-2400507	2912.36	42411.3	1004.64	0
886220	4581.5	-4095337	3584.66	72355	1005.62	0
880990	4583	-4100567	3586.16	72447.4	1006.7	0
870896	4581.6	-4110661	3584.76	72625.8	1007.67	0
883198	4583.8	-4098359	3586.96	72408.4	1008.64	0
869415	4581.2	-4112142	3584.36	72651.9	1009.61	0
880220	4582.5	-4101337	3585.66	72461	1010.69	0
891567	4582.5	-4089990	3585.66	72260.6	1011.66	0
891648	4583.3	-4089909	3586.46	72259.1	1012.63	0
891129	4583.1	-4090428	3586.26	72268.3	1013.6	0
889297	4582.4	-4092260	3585.56	72300.7	1014.68	0
884102	4584.7	-4097455	3587.86	72392.4	1015.65	0
894228	4584.9	-4087329	3588.06	72213.5	1016.62	0
889345	4585.3	-4092212	3588.46	72299.8	1017.7	0
900213	4585.9	-4081344	3589.06	72107.8	1018.67	0
892714	4585.7	-4088843	3588.86	72240.3	1019.64	0
887825	4585.5	-4093732	3588.66	72326.7	1020.61	0
898588	4585.5	-4082969	3588.66	72136.5	1021.69	0
887284	4586.2	-4094273	3589.36	72336.2	1022.66	0
884504	4584.8	-4097053	3587.96	72385.3	1023.63	0
898926	4586.3	-4082631	3589.46	72130.5	1024.71	0
894300	4586.3	-4087257	3589.46	72212.3	1025.68	0
886706	4586	-4094851	3589.16	72346.4	1026.65	0
885791	4584.6	-4095766	3587.76	72362.6	1027.62	0
886899	4585.4	-4094658	3588.56	72343	1028.7	0
893434	4583.2	-4088123	3586.36	72227.6	1029.67	0
905412	4584.7	-4076145	3587.86	72015.9	1030.64	0
897496	4585.9	-4084061	3589.06	72155.8	1031.72	0
902309	4585	-4079248	3588.16	72070.8	1032.69	0
898320	4585	-4083237	3588.16	72141.2	1033.66	0
894071	4583.8	-4087486	3586.96	72216.3	1034.63	0
892701	4584.5	-4088856	3587.66	72240.5	1035.72	0
897502	4584.3	-4084055	3587.46	72155.7	1036.68	0
885558	4583.7	-4095999	3586.86	72366.7	1037.65	0
892480	4583.8	-4089077	3586.96	72244.4	1038.62	0
888830	4587.2	-4092727	3590.36	72308.9	1039.7	0
902319	4587.2	-4079238	3590.36	72070.6	1040.67	0
891346	4587.7	-4090211	3590.86	72264.5	1041.64	0
881781	4585.6	-4099776	3588.76	72433.4	1042.72	0
897547	4583.4	-4084010	3586.56	72154.9	1043.69	0
894380	4584	-4087177	3587.16	72210.9	1044.66	0
904061	4584.2	-4077496	3587.36	72039.8	1045.63	0
893408	4584.1	-4088149	3587.26	72228	1046.71	0
906679	4584.2	-4074878	3587.36	71993.6	1047.68	0
900724	4585	-4080833	3588.16	72098.8	1048.65	0
895942	4583.5	-4085615	3586.66	72183.2	1049.73	0
892377	4582.9	-4089180	3586.06	72246.2	1050.7	0
892699	4583	-4088858	3586.16	72240.6	1051.67	0
901299	4583.9	-4080258	3587.06	72088.6	1052.64	0
897360	4584	-4084197	3587.16	72158.2	1053.72	0
894147	4584	-4087410	3587.16	72215	1054.69	0
893120	4583.7	-4088437	3586.86	72233.1	1055.66	0
895017	4582.7	-4086540	3585.86	72199.6	1056.74	0
897035	4583.4	-4084522	3586.56	72163.9	1057.72	0
891858	4583.5	-4089699	3586.66	72255.4	1058.68	0
900550	4583.4	-4081007	3586.56	72101.9	1059.65	0
899875	4584	-4081682	3587.16	72113.8	1060.73	0
901040	4584.7	-4080517	3587.86	72093.2	1061.7	0
903935	4584.5	-4077622	3587.66	72042	1062.67	0
898015	4583.7	-4083542	3586.86	72146.6	1063.64	0
908981	4584.9	-4072576	3588.06	71952.9	1064.72	0
920648	4587.7	-4060909	3590.86	71746.8	1065.69	0
915062	4586.6	-4066495	3589.76	71845.5	1066.66	0
911936	4586.5	-4069621	3589.66	71900.7	1067.74	0
908584	4586.4	-4072973	3589.56	71959.9	1068.71	0
907448	4586.4	-4074109	3589.56	71980	1069.68	0
899577	4586	-4081980	3589.16	72119	1070.65	0
904018	4584.4	-4077539	3587.56	72040.6	1071.73	0
898510	4585.2	-4083047	3588.36	72137.9	1072.7	0
901942	4584.9	-4079615	3588.06	72077.2	1073.67	0
901034	4584.1	-4080523	3587.26	72093.3	1074.76	0
903504	4584.5	-4078053	3587.66	72049.7	1075.73	0
895003	4583.9	-4086554	3587.06	72199.9	1076.69	0
890733	4584	-4090824	3587.16	72275.3	1077.66	0
892745	4582.9	-4088812	3586.06	72239.7	1078.74	0
895570	4583.6	-4085987	3586.76	72189.8	1079.71	0
911918	4585.5	-4069638	3588.66	71901	1080.68	0
897938	4585.4	-4083619	3588.56	72148	1081.77	0
891145	4583.6	-4090412	3586.76	72268	1082.73	0
885387	4583.6	-4096170	3586.76	72369.7	1083.7	0
893003	4582.3	-4088554	3585.46	72235.2	1084.67	0
898883	4584	-4082674	3587.16	72131.3	1085.76	0
899533	4583.9	-4082024	3587.06	72119.8	1086.72	0
901874	4584.2	-4079683	3587.36	72078.4	1087.69	0
896996	4584.5	-4084561	3587.66	72164.6	1088.66	0
901157	4583.3	-4080400	3586.46	72091.1	1089.74	0
902972	4585.4	-4078585	3588.56	72059.1	1090.71	0
896065	4585.2	-4085492	3588.36	72181.1	1091.68	0
886821	4583.5	-4094736	3586.66	72344.4	1092.77	0
890014	4583.1	-4091543	3586.26	72288	1093.73	0
894726	4584.6	-4086832	3587.76	72204.8	1094.7	0
884891	4582.7	-4096666	3585.86	72378.5	1095.67	0
888835	4583.2	-4092722	3586.36	72308.8	1096.76	0
879465	4582.7	-4102092	3585.86	72474.4	1097.73	0
889967	4582.7	-4091590	3585.86	72288.8	1098.69	0
893663	4583.8	-4087894	3586.96	72223.5	1099.78	0
887558	4583.7	-4093999	3586.86	72331.4	1100.74	0
896649	4583	-4084908	3586.16	72170.8	1101.72	0
886764	4583.6	-4094793	3586.76	72345.4	1102.69	0
891240	4583.1	-4090317	3586.26	72266.3	1103.78	0
895481	4582.8	-4086076	3585.96	72191.4	1104.74	0
890155	4583.2	-4091402	3586.36	72285.5	1105.71	0
901788	4582.9	-4079769	3586.06	72080	1106.68	0
898114	4583.8	-4083443	3586.96	72144.9	1107.77	0
898710	4583.6	-4082847	3586.76	72134.4	1108.73	0
900502	4584.2	-4081055	3587.36	72102.7	1109.7	0
894730	4583	-4086826	3586.16	72204.7	1110.79	0
897426	4584	-4084132	3587.16	72157.1	1111.75	0
903368	4585.6	-4078189	3588.76	72052.1	1112.72	0
900246	4585.6	-4081312	3588.76	72107.2	1113.69	0
890309	4585	-4091248	3588.16	72282.8	1114.78	0
903392	4583.9	-4078165	3587.06	72051.6	1115.74	0
900690	4585.7	-4080867	3588.86	72099.4	1116.71	0
890342	4584.5	-4091215	3587.66	72282.2	1117.8	0
895371	4583	-4086186	3586.16	72193.4	1118.77	0
880510	4584.5	-4101047	3587.66	72455.9	1119.73	0
890180	4581.8	-4091377	3584.96	72285.1	1120.7	0
888318	4582.7	-4093239	3585.86	72318	1121.79	0
897168	4584.2	-4084389	3587.36	72161.6	1122.76	0
894511	4584.4	-4087046	3587.56	72208.6	1123.73	0
894845	4583.7	-4086712	3586.86	72202.6	1124.7	0
888352	4583.4	-4093205	3586.56	72317.4	1125.78	0
887762	4583	-4093795	3586.16	72327.8	1126.74	0
899019	4583	-4082538	3586.16	72128.9	1127.71	0
897978	4584.9	-4083579	3588.06	72147.3	1128.8	0
896457	4585.3	-4085100	3588.46	72174.2	1129.77	0
892122	4585.2	-4089435	3588.36	72250.8	1130.74	0
892744	4584.8	-4088813	3587.96	72239.8	1131.7	0
898843	4584.1	-4082714	3587.26	72132	1132.79	0
897011	4585.7	-4084546	3588.86	72164.4	1133.76	0
909935	4585.5	-4071622	3588.66	71936	1134.72	0
900380	4585.2	-4081177	3588.36	72104.9	1135.81	0
892550	4584.9	-4089007	3588.06	72243.2	1136.78	0
901064	4584.7	-4080493	3587.86	72092.8	1137.75	0
900272	4585.6	-4081285	3588.76	72106.8	1138.71	0
893236	4584.7	-4088321	3587.86	72231.1	1139.8	0
894950	4584.6	-4086607	3587.76	72200.8	1140.77	0
893114	4584.3	-4088443	3587.46	72233.2	1141.73	0
893844	4584.1	-4087713	3587.26	72220.3	1142.82	0
892113	4584.1	-4089444	3587.26	72250.9	1143.79	0
889702	4584.4	-4091855	3587.56	72293.5	1144.76	0
887947	4583.9	-4093610	3587.06	72324.5	1145.72	0
893589	4584.5	-4087968	3587.66	72224.8	1146.81	0
895213	4583.7	-4086344	3586.86	72196.1	1147.77	0
897053	4584.2	-4084504	3587.36	72163.6	1148.74	0
885831	4584.3	-4095726	3587.46	72361.9	1149.72	0
906008	4584.7	-4075549	3587.86	72005.4	1150.8	0
889313	4583.6	-4092244	3586.76	72300.4	1151.77	0
888364	4582.5	-4093192	3585.66	72317.1	1152.74	0
883226	4583.3	-4098331	3586.46	72407.9	1153.83	0
871862	4582.3	-4109695	3585.46	72608.7	1154.8	0
893176	4584.8	-4088381	3587.96	72232.1	1155.77	0
889965	4584.8	-4091592	3587.96	72288.9	1156.73	0
886213	4585	-4095344	3588.16	72355.2	1157.82	0
886351	4584.3	-4095206	3587.46	72352.7	1158.78	0
886571	4585.9	-4094986	3589.06	72348.8	1159.75	0
888432	4585.4	-4093126	3588.56	72315.9	1160.72	0
893993	4586	-4087564	3589.16	72217.7	1161.81	0
890129	4586	-4091428	3589.16	72286	1162.77	0
885932	4584.7	-4095625	3587.86	72360.1	1163.74	0
893249	4583.8	-4088308	3586.96	72230.8	1164.83	0
891181	4585.7	-4090376	3588.86	72267.4	1165.8	0
891493	4584.3	-4090064	3587.46	72261.9	1166.77	0
889216	4584.6	-4092341	3587.76	72302.1	1167.73	0
897451	4584.5	-4084106	3587.66	72156.6	1168.82	0
885202	4583.2	-4096355	3586.36	72373	1169.79	0
893557	4585	-4088000	3588.16	72225.4	1170.76	0
894076	4584.6	-4087481	3587.76	72216.2	1171.84	0
898796	4584.6	-4082761	3587.76	72132.8	1172.81	0
897311	4585.4	-4084246	3588.56	72159.1	1173.78	0
894511	4584.2	-4087046	3587.36	72208.5	1174.75	0
901013	4584.7	-4080544	3587.86	72093.7	1175.83	0
898440	4585.1	-4083117	3588.26	72139.1	1176.8	0
896954	4584.8	-4084603	3587.96	72165.4	1177.77	0
891338	4585	-4090219	3588.16	72264.6	1178.85	0
885533	4584	-4096024	3587.16	72367.2	1179.82	0
890653	4584.5	-4090904	3587.66	72276.7	1180.79	0
892359	4583.8	-4089198	3586.96	72246.6	1181.76	0
893840	4585.3	-4087717	3588.46	72220.4	1182.84	0
903146	4586.2	-4078411	3589.36	72056	1183.81	0
885658	4584	-4095899	3587.16	72365	1184.78	0
894276	4584	-4087281	3587.16	72212.7	1185.74	0
895758	4585.4	-4085799	3588.56	72186.5	1186.83	0
888769	4585.4	-4092788	3588.56	72310	1187.8	0
884033	4584.1	-4097524	3587.26	72393.7	1188.77	0
891287	4583.5	-4090270	3586.66	72265.5	1189.85	0
884273	4584.5	-4097284	3587.66	72389.4	1190.82	0
896403	4584	-4085154	3587.16	72175.1	1191.79	0
894133	4584.3	-4087424	3587.46	72215.2	1192.76	0
897254	4584.8	-4084303	3587.96	72160.1	1193.84	0
894807	4583.6	-4086750	3586.76	72203.3	1194.81	0
894349	4583.9	-4087208	3587.06	72211.4	1195.78	0
891120	4583.8	-4090437	3586.96	72268.4	1196.86	0
898134	4584.4	-4083423	3587.56	72144.5	1197.83	0
887426	4584	-4094131	3587.16	72333.7	1198.8	0
887889	4583.2	-4093668	3586.36	72325.5	1199.77	0
893449	4584.6	-4088108	3587.76	72227.3	1200.85	0
895215	4584.6	-4086342	3587.76	72196.1	1201.83	0
898448	4585	-4083109	3588.16	72139	1202.8	0
902539	4584.1	-4079018	3587.26	72066.7	1203.77	0
895012	4585.2	-4086545	3588.36	72199.7	1204.85	0
891397	4584.4	-4090160	3587.56	72263.6	1205.82	0
887891	4583.2	-4093666	3586.36	72325.5	1206.79	0
895444	4584.1	-4086113	3587.26	72192.1	1207.87	0
886345	4584.2	-4095212	3587.36	72352.8	1208.84	0
892672	4583.7	-4088885	3586.86	72241	1209.81	0
896958	4583.9	-4084600	3587.06	72165.3	1210.78	0
887119	4583.4	-4094438	3586.56	72339.1	1211.86	0
886340	4583.3	-4095217	3586.46	72352.9	1212.83	0
885158	4582	-4096399	3585.16	72373.8	1213.8	0
898353	4584.2	-4083204	3587.36	72140.7	1214.77	0
898498	4584.9	-4083059	3588.06	72138.1	1215.86	0
887906	4584.9	-4093651	3588.06	72325.2	1216.83	0
895343	4583.9	-4086214	3587.06	72193.8	1217.8	0
890456	4584.2	-4091101	3587.36	72280.2	1218.88	0
899822	4583.8	-4081735	3586.96	72114.7	1219.85	0
895375	4585.1	-4086182	3588.26	72193.3	1220.82	0
892844	4584	-4088713	3587.16	72238	1221.79	0
886623	4584	-4094934	3587.16	72347.9	1222.87	0
890048	4583.6	-4091509	3586.76	72287.4	1223.84	0
886300	4582.5	-4095257	3585.66	72353.6	1224.81	0
895636	4584.1	-4085921	3587.26	72188.7	1225.78	0
894642	4584.3	-4086915	3587.46	72206.2	1226.86	0
896688	4584.8	-4084869	3587.96	72170.1	1227.83	0
899615	4585	-4081942	3588.16	72118.4	1228.8	0
895658	4584.1	-4085899	3587.26	72188.3	1229.88	0
897406	4584.1	-4084151	3587.26	72157.4	1230.85	0
898476	4585.2	-4083081	3588.36	72138.5	1231.82	0
895522	4583.9	-4086035	3587.06	72190.7	1232.79	0
902842	4584.7	-4078715	3587.86	72061.4	1233.87	0
893017	4584.9	-4088540	3588.06	72234.9	1234.84	0
896060	4584.2	-4085497	3587.36	72181.2	1235.81	0
893335	4583.5	-4088222	3586.66	72229.3	1236.89	0
898003	4584.6	-4083554	3587.76	72146.9	1237.86	0
899808	4583.9	-4081749	3587.06	72115	1238.83	0
907315	4585.1	-4074242	3588.26	71982.3	1239.8	0
898321	4584.2	-4083236	3587.36	72141.2	1240.88	0
902139	4585.9	-4079418	3589.06	72073.8	1241.85	0
900991	4584.5	-4080566	3587.66	72094.1	1242.82	0
896475	4584.5	-4085082	3587.66	72173.8	1243.9	0
895480	4584.1	-4086077	3587.26	72191.4	1244.87	0
906931	4584.1	-4074626	3587.26	71989.1	1245.84	0
894698	4585.5	-4086859	3588.66	72205.2	1246.81	0
902393	4584.3	-4079164	3587.46	72069.3	1247.89	0
898266	4584.6	-4083291	3587.76	72142.2	1248.86	0
904423	4584.5	-4077134	3587.66	72033.4	1249.83	0
904125	4585.6	-4077432	3588.76	72038.7	1250.8	0
900490	4584.6	-4081066	3587.76	72102.9	1251.88	0
904855	4584.5	-4076702	3587.66	72025.8	1252.86	0
897577	4584.6	-4083980	3587.76	72154.4	1253.83	0
894680	4583.5	-4086877	3586.66	72205.6	1254.91	0
902719	4585.1	-4078838	3588.26	72063.5	1255.88	0
896989	4583.5	-4084568	3586.66	72164.8	1256.85	0
899551	4584.2	-4082006	3587.36	72119.5	1257.82	0
901575	4584.4	-4079982	3587.56	72083.7	1258.9	0
900448	4584.2	-4081109	3587.36	72103.6	1259.87	0
900366	4584.2	-4081191	3587.36	72105.1	1260.84	0
900654	4584.9	-4080903	3588.06	72100	1261.81	0
906251	4585	-4075306	3588.16	72001.1	1262.9	0
899386	4584.4	-4082171	3587.56	72122.4	1263.87	0
898199	4584.2	-4083358	3587.36	72143.4	1264.84	0
898799	4584.5	-4082758	3587.66	72132.8	1265.81	0
907672	4585.4	-4073885	3588.56	71976	1266.89	0
903777	4585.1	-4077780	3588.26	72044.8	1267.86	0
900356	4584.1	-4081201	3587.26	72105.3	1268.83	0
901299	4584	-4080258	3587.16	72088.6	1269.91	0
901641	4584.3	-4079916	3587.46	72082.6	1270.88	0
891798	4583.8	-4089759	3586.96	72256.5	1271.85	0
897096	4583.8	-4084461	3586.96	72162.9	1272.82	0
900580	4584.5	-4080977	3587.66	72101.3	1273.9	0
912514	4584.5	-4069043	3587.66	71890.5	1274.87	0
897410	4585.8	-4084147	3588.96	72157.3	1275.84	0
894260	4584	-4087297	3587.16	72213	1276.92	0
906759	4584.5	-4074798	3587.66	71992.1	1277.89	0
898114	4584.7	-4083443	3587.86	72144.9	1278.86	0
893814	4584	-4087743	3587.16	72220.9	1279.83	0
895679	4583.8	-4085878	3586.96	72187.9	1280.91	0
892245	4583.3	-4089312	3586.46	72248.6	1281.88	0
891760	4583.7	-4089797	3586.86	72257.1	1282.85	0
889465	4583.6	-4092092	3586.76	72297.7	1283.93	0
890764	4582.9	-4090793	3586.06	72274.7	1284.9	0
888876	4582.9	-4092681	3586.06	72308.1	1285.87	0
892484	4584	-4089073	3587.16	72244.4	1286.84	0
897645	4584.5	-4083912	3587.66	72153.2	1287.92	0
886996	4582.7	-4094561	3585.86	72341.3	1288.89	0
893500	4582.7	-4088057	3585.86	72226.4	1289.86	0
886201	4582.8	-4095356	3585.96	72355.4	1290.83	0
893802	4582.1	-4087755	3585.26	72221.1	1291.91	0
890142	4583.6	-4091415	3586.76	72285.7	1292.88	0
899142	4583.4	-4082415	3586.56	72126.7	1293.85	0
901920	4584	-4079637	3587.16	72077.6	1294.93	0
902392	4585.6	-4079165	3588.76	72069.3	1295.9	0
897612	4585.1	-4083945	3588.26	72153.8	1296.87	0
896478	4583.4	-4085079	3586.56	72173.8	1297.84	0
897755	4583.2	-4083802	3586.36	72151.2	1298.92	0
890639	4583.5	-4090918	3586.66	72276.9	1299.89	0
888396	4583.2	-4093162	3586.36	72316.6	1300.86	0
893657	4583.2	-4087900	3586.36	72223.6	1301.84	0
895768	4584.1	-4085789	3587.26	72186.3	1302.92	0
893398	4584.1	-4088159	3587.26	72228.2	1303.89	0
898256	4583.7	-4083301	3586.86	72142.4	1304.86	0
889194	4584.3	-4092363	3587.46	72302.5	1305.94	0
898165	4583.5	-4083392	3586.66	72144	1306.91	0
895555	4583.8	-4086002	3586.96	72190.1	1307.88	0
895613	4583.8	-4085944	3586.96	72189.1	1308.85	0
895671	4584.1	-4085886	3587.26	72188.1	1309.93	0
887922	4583.7	-4093635	3586.86	72325	1310.9	0
898476	4584.1	-4083081	3587.26	72138.5	1311.87	0
890023	4583.2	-4091534	3586.36	72287.8	1312.95	0
894524	4583.1	-4087033	3586.26	72208.3	1313.92	0
888515	4583.2	-4093042	3586.36	72314.5	1314.89	0
899446	4584.6	-4082111	3587.76	72121.4	1315.86	0
891477	4583.9	-4090080	3587.06	72262.1	1316.94	0
895654	4584.8	-4085903	3587.96	72188.3	1317.91	0
887331	4584.8	-4094226	3587.96	72335.4	1318.88	0
898232	4583.5	-4083325	3586.66	72142.8	1319.97	0
894551	4584	-4087006	3587.16	72207.8	1320.93	0
901062	4584.9	-4080495	3588.06	72092.8	1321.9	0
894370	4584.7	-4087187	3587.86	72211	1322.87	0
887058	4584.1	-4094499	3587.26	72340.2	1323.95	0
900685	4583.8	-4080872	3586.96	72099.5	1324.92	0
894802	4585.3	-4086755	3588.46	72203.4	1325.89	0
889922	4584.2	-4091635	3587.36	72289.6	1326.87	0
891013	4583.7	-4090544	3586.86	72270.3	1327.95	0
893652	4583.7	-4087905	3586.86	72223.7	1328.91	0
898289	4584.7	-4083268	3587.86	72141.8	1329.88	0
887972	4584.4	-4093585	3587.56	72324.1	1330.96	0
894454	4583.6	-4087103	3586.76	72209.6	1331.93	0
889612	4584.3	-4091945	3587.46	72295.1	1332.9	0
886460	4584.3	-4095097	3587.46	72350.8	1333.87	0
887686	4583.3	-4093871	3586.46	72329.1	1334.95	0
891899	4583.5	-4089658	3586.66	72254.7	1335.92	0
890834	4583.8	-4090723	3586.96	72273.5	1336.89	0
885114	4583.9	-4096443	3587.06	72374.6	1337.97	0
888140	4582.1	-4093416	3585.26	72321.1	1338.94	0
881426	4583.8	-4100131	3586.96	72439.7	1339.91	0
886823	4584.1	-4094734	3587.26	72344.4	1340.88	0
882886	4583.4	-4098671	3586.56	72413.9	1341.96	0
895842	4584.3	-4085715	3587.46	72185	1342.93	0
890126	4584.3	-4091431	3587.46	72286	1343.9	0
893522	4584.4	-4088035	3587.56	72226	1344.98	0
892159	4583.9	-4089398	3587.06	72250.1	1345.95	0
893471	4584.1	-4088086	3587.26	72226.9	1346.92	0
889342	4584.1	-4092215	3587.26	72299.9	1347.89	0
894778	4583.2	-4086779	3586.36	72203.8	1348.97	0
894924	4584	-4086633	3587.16	72201.2	1349.94	0
887683	4584.3	-4093874	3587.46	72329.2	1350.91	0
893629	4584.1	-4087928	3587.26	72224.1	1351.88	0
893481	4584	-4088076	3587.16	72226.7	1352.97	0
891267	4584.1	-4090290	3587.26	72265.9	1353.94	0
887543	4583.5	-4094014	3586.66	72331.6	1354.91	0
892841	4583.8	-4088716	3586.96	72238.1	1355.99	0
891371	4583.6	-4090186	3586.76	72264	1356.96	0
887235	4584	-4094322	3587.16	72337.1	1357.93	0
889622	4583.6	-4091934	3586.76	72294.9	1358.9	0
881715	4582.4	-4099842	3585.56	72434.6	1359.98	0
886038	4584.1	-4095519	3587.26	72358.2	1360.95	0
895305	4584	-4086252	3587.16	72194.5	1361.92	0
889992	4584	-4091565	3587.16	72288.4	1362.89	0
895186	4583.8	-4086371	3586.96	72196.6	1363.97	0
889100	4584.8	-4092457	3587.96	72304.1	1364.94	0
899454	4584.9	-4082103	3588.06	72121.2	1365.91	0
888324	4584.3	-4093233	3587.46	72317.9	1366.99	0
896572	4583.4	-4084985	3586.56	72172.1	1367.96	0
899181	4585.7	-4082376	3588.86	72126	1368.93	0
892743	4584.8	-4088814	3587.96	72239.8	1369.9	0
899050	4585.5	-4082507	3588.66	72128.3	1370.98	0
894890	4585.5	-4086667	3588.66	72201.9	1371.95	0
892518	4583.8	-4089039	3586.96	72243.8	1372.92	0
890436	4583.9	-4091121	3587.06	72280.5	1374.01	0
887537	4583.5	-4094020	3586.66	72331.8	1374.98	0
888352	4583.1	-4093205	3586.26	72317.4	1375.94	0
891754	4583.1	-4089803	3586.26	72257.2	1376.91	0
892557	4583.5	-4089000	3586.66	72243.1	1377.99	0
891922	4584.1	-4089635	3587.26	72254.3	1378.96	0
888320	4584.5	-4093237	3587.66	72317.9	1379.93	0
894159	4583.8	-4087398	3586.96	72214.8	1381.02	0
891239	4584.4	-4090318	3587.56	72266.3	1381.98	0
890449	4584	-4091108	3587.16	72280.3	1382.95	0
883194	4582.8	-4098363	3585.96	72408.5	1383.92	0
898478	4584.4	-4083079	3587.56	72138.5	1385.01	0
888086	4584.5	-4093471	3587.66	72322.1	1385.97	0
896617	4584.5	-4084940	3587.66	72171.3	1386.94	0
893132	4584.3	-4088425	3587.46	72232.9	1387.91	0
902767	4584.6	-4078790	3587.76	72062.7	1389	0
889238	4585	-4092319	3588.16	72301.7	1389.97	0
894166	4584	-4087391	3587.16	72214.6	1390.93	0
892046	4584	-4089511	3587.16	72252.1	1392.02	0
894711	4584	-4086846	3587.16	72205	1392.98	0
881500	4584.6	-4100057	3587.76	72438.4	1393.95	0
901049	4583.5	-4080508	3586.66	72093	1394.92	0
901346	4585.6	-4080211	3588.76	72087.8	1396.01	0
893371	4585.4	-4088186	3588.56	72228.7	1396.97	0
894948	4585.8	-4086610	3588.96	72200.8	1397.94	0
897969	4585.2	-4083588	3588.36	72147.4	1399.03	0
889934	4584	-4091623	3587.16	72289.4	1399.99	0
888644	4585.2	-4092913	3588.36	72312.2	1400.97	0
889828	4584.7	-4091729	3587.86	72291.3	1401.94	0
897127	4584.2	-4084430	3587.36	72162.3	1403.02	0
895495	4584.3	-4086062	3587.46	72191.2	1404	0
895940	4584.4	-4085617	3587.56	72183.3	1404.97	0
889656	4584	-4091901	3587.16	72294.3	1405.94	0
895657	4584.5	-4085900	3587.66	72188.3	1407.02	0
897499	4584.5	-4084058	3587.66	72155.8	1407.99	0
897124	4584.4	-4084433	3587.56	72162.4	1408.96	0
891539	4583.2	-4090018	3586.36	72261.1	1409.93	0
897891	4584	-4083666	3587.16	72148.8	1411.02	0
893127	4584	-4088430	3587.16	72233	1411.99	0
898335	4584.5	-4083222	3587.66	72141	1412.95	0
899739	4583.7	-4081818	3586.86	72116.2	1414.04	0
885624	4583.9	-4095933	3587.06	72365.6	1415.01	0
891046	4583.9	-4090511	3587.06	72269.8	1415.97	0
887092	4585.1	-4094465	3588.26	72339.6	1416.94	0
892508	4586.5	-4089049	3589.66	72243.9	1418.03	0
881885	4585.5	-4099672	3588.66	72431.6	1418.99	0
880759	4585	-4100798	3588.16	72451.5	1419.96	0
881135	4584.4	-4100422	3587.56	72444.9	1421.05	0
880353	4584.4	-4101204	3587.56	72458.7	1422.02	0
886352	4584.5	-4095204	3587.66	72352.7	1422.99	0
881521	4585	-4100036	3588.16	72438.1	1423.95	0
880966	4584.9	-4100591	3588.06	72447.9	1425.04	0
882407	4584.5	-4099150	3587.66	72422.4	1426.01	0
882665	4584.5	-4098892	3587.66	72417.8	1426.97	0
887445	4585.5	-4094112	3588.66	72333.4	1427.94	0
881652	4585.9	-4099905	3589.06	72435.7	1429.03	0
884913	4585.2	-4096644	3588.36	72378.1	1429.99	0
883758	4585.4	-4097799	3588.56	72398.5	1430.96	0
883380	4583.7	-4098177	3586.86	72405.2	1432.05	0
879051	4584.5	-4102506	3587.66	72481.7	1433.02	0
885706	4584	-4095851	3587.16	72364.1	1433.98	0
881580	4584.6	-4099977	3587.76	72437	1434.95	0
885840	4584.8	-4095717	3587.96	72361.7	1436.04	0
883883	4584.8	-4097674	3587.96	72396.3	1437.01	0
883478	4584.7	-4098079	3587.86	72403.5	1437.98	0
886619	4585.7	-4094938	3588.86	72348	1439.06	0
884163	4585.7	-4097394	3588.86	72391.4	1440.03	0
875156	4585.1	-4106401	3588.26	72550.5	1441	0
882562	4583.5	-4098995	3586.66	72419.6	1441.96	0
884179	4586.2	-4097378	3589.36	72391.1	1443.05	0
884960	4584.9	-4096597	3588.06	72377.3	1444.02	0
886650	4586.3	-4094907	3589.46	72347.4	1444.98	0
873264	4584.5	-4108293	3587.66	72583.9	1446.07	0
880746	4584.1	-4100811	3587.26	72451.7	1447.04	0
886867	4584.5	-4094690	3587.66	72343.6	1448.01	0
882298	4584.9	-4099259	3588.06	72424.3	1448.98	0
890149	4585.8	-4091408	3588.96	72285.6	1450.06	0
883286	4585.8	-4098271	3588.96	72406.9	1451.03	0
883395	4585.2	-4098162	3588.36	72404.9	1452	0
883102	4583.9	-4098455	3587.06	72410.1	1452.97	0
887226	4584.3	-4094331	3587.46	72337.3	1454.05	0
881824	4584.9	-4099733	3588.06	72432.7	1455.03	0
893951	4584.6	-4087606	3587.76	72218.4	1455.99	0
890089	4586.4	-4091468	3589.56	72286.7	1457.08	0
892147	4585.6	-4089410	3588.76	72250.3	1458.05	0
890099	4584.9	-4091458	3588.06	72286.5	1459.02	0
882671	4585	-4098886	3588.16	72417.7	1459.98	0
886541	4585.2	-4095016	3588.36	72349.4	1461.07	0
881793	4584.7	-4099764	3587.86	72433.2	1462.04	0
875614	4582.9	-4105943	3586.06	72542.4	1463.01	0
886321	4585.9	-4095236	3589.06	72353.2	1463.98	0
875563	4584.3	-4105994	3587.46	72543.3	1465.07	0
879686	4584.3	-4101871	3587.46	72470.5	1466.03	0
890938	4584.7	-4090619	3587.86	72271.7	1467	0
890112	4584.4	-4091445	3587.56	72286.3	1468.09	0
886881	4583.6	-4094676	3586.76	72343.3	1469.06	0
889674	4585	-4091883	3588.16	72294	1470.03	0
883773	4584.1	-4097784	3587.26	72398.3	1471	0
895519	4585.4	-4086038	3588.56	72190.7	1472.08	0
888872	4584.8	-4092685	3587.96	72308.2	1473.05	0
892798	4584.7	-4088759	3587.86	72238.8	1474.02	0
891461	4583.8	-4090096	3586.96	72262.4	1474.99	0
888546	4584.4	-4093011	3587.56	72313.9	1476.08	0
886673	4584.1	-4094884	3587.26	72347	1477.05	0
885082	4582.9	-4096474	3586.06	72375.1	1478.02	0
894629	4584.8	-4086928	3587.96	72206.5	1479.1	0
892477	4584.9	-4089080	3588.06	72244.5	1480.07	0
889709	4584.9	-4091848	3588.06	72293.4	1481.04	0
894752	4584.4	-4086805	3587.56	72204.3	1482.01	0
891347	4585	-4090210	3588.16	72264.4	1483.09	0
896413	4585.1	-4085144	3588.26	72174.9	1484.06	0
894796	4585.6	-4086761	3588.76	72203.5	1485.03	0
893834	4584.7	-4087723	3587.86	72220.5	1486	0
898540	4585.8	-4083017	3588.96	72137.4	1487.09	0
900409	4585.5	-4081148	3588.66	72104.3	1488.06	0
890504	4585.4	-4091053	3588.56	72279.3	1489.03	0
895758	4584.6	-4085799	3587.76	72186.5	1490	0
901902	4586.3	-4079655	3589.46	72078	1491.08	0
892449	4585.4	-4089108	3588.56	72245	1492.05	0
896710	4584.9	-4084847	3588.06	72169.7	1493.02	0
890695	4584.6	-4090862	3587.76	72276	1494.1	0
891865	4584.6	-4089692	3587.76	72255.3	1495.07	0
894892	4584.7	-4086664	3587.86	72201.8	1496.04	0
883873	4585.3	-4097684	3588.46	72396.5	1497.01	0
895930	4583.7	-4085627	3586.86	72183.5	1498.09	0
901936	4586	-4079621	3589.16	72077.4	1499.06	0
901243	4585.8	-4080314	3588.96	72089.6	1500.03	0
898992	4585.8	-4082565	3588.96	72129.4	1501.12	0
900086	4585.7	-4081470	3588.86	72110	1502.08	0
889273	4585.1	-4092284	3588.26	72301.1	1503.05	0
895230	4584.2	-4086327	3587.36	72195.8	1504.02	0
895209	4585.1	-4086348	3588.26	72196.2	1505.11	0
886746	4584.1	-4094811	3587.26	72345.7	1506.08	0
896612	4585.1	-4084945	3588.26	72171.4	1507.05	0
893493	4585.5	-4088064	3588.66	72226.5	1508.02	0
899318	4585.7	-4082239	3588.86	72123.6	1509.1	0
896006	4585.7	-4085551	3588.86	72182.1	1510.07	0
897649	4585.5	-4083908	3588.66	72153.1	1511.04	0
884327	4584.1	-4097230	3587.26	72388.5	1512.12	0
891697	4585	-4089860	3588.16	72258.3	1513.09	0
890332	4583.8	-4091225	3586.96	72282.4	1514.06	0
888808	4583.6	-4092749	3586.76	72309.3	1515.03	0
894277	4583.5	-4087280	3586.66	72212.7	1516.11	0
896069	4585.9	-4085488	3589.06	72181	1517.08	0
889519	4584.7	-4092038	3587.86	72296.8	1518.05	0
895842	4584.8	-4085715	3587.96	72185	1519.02	0
891139	4585.3	-4090418	3588.46	72268.1	1520.11	0
893999	4585.7	-4087558	3588.86	72217.6	1521.08	0
892053	4585.3	-4089504	3588.46	72252	1522.05	0
887464	4584.6	-4094093	3587.76	72333.1	1523.13	0
890576	4585.1	-4090981	3588.26	72278.1	1524.1	0
892172	4585.1	-4089384	3588.26	72249.9	1525.07	0
889428	4585.6	-4092129	3588.76	72298.4	1526.04	0
887550	4584.7	-4094007	3587.86	72331.5	1527.12	0
886244	4583.7	-4095313	3586.86	72354.6	1528.09	0
890379	4584.9	-4091178	3588.06	72281.5	1529.06	0
896543	4585.7	-4085014	3588.86	72172.6	1530.14	0
890354	4585.5	-4091203	3588.66	72282	1531.11	0
889949	4585.4	-4091608	3588.56	72289.1	1532.08	0
887380	4584.7	-4094177	3587.86	72334.5	1533.05	0
889005	4585.3	-4092552	3588.46	72305.8	1534.13	0
894783	4585.1	-4086774	3588.26	72203.7	1535.1	0
897875	4586.7	-4083682	3589.86	72149.1	1536.07	0
888644	4585.4	-4092913	3588.56	72312.2	1537.04	0
893175	4585.6	-4088382	3588.76	72232.1	1538.12	0
885584	4585.6	-4095973	3588.76	72366.3	1539.1	0
897904	4584.9	-4083653	3588.06	72148.6	1540.07	0
893849	4585.7	-4087708	3588.86	72220.2	1541.15	0
892641	4585.2	-4088916	3588.36	72241.6	1542.12	0
888318	4585.7	-4093239	3588.86	72318	1543.09	0
896002	4585.2	-4085555	3588.36	72182.2	1544.06	0
898129	4585.2	-4083428	3588.36	72144.6	1545.14	0
887247	4584.4	-4094310	3587.56	72336.9	1546.11	0
883597	4584.3	-4097960	3587.46	72401.4	1547.08	0
893875	4584.5	-4087682	3587.66	72219.8	1548.05	0
897498	4584.6	-4084059	3587.76	72155.8	1549.14	0
891382	4585.1	-4090175	3588.26	72263.8	1550.11	0
896967	4585.3	-4084590	3588.46	72165.1	1551.08	0
892305	4584.9	-4089252	3588.06	72247.5	1552.16	0
893785	4585.4	-4087772	3588.56	72221.4	1553.13	0
899996	4585.4	-4081561	3588.56	72111.6	1554.1	0
894646	4585.7	-4086911	3588.86	72206.2	1555.07	0
890582	4584.4	-4090975	3587.56	72278	1556.15	0
892791	4585.5	-4088766	3588.66	72238.9	1557.12	0
888289	4584.6	-4093268	3587.76	72318.5	1558.09	0
892195	4585.5	-4089362	3588.66	72249.5	1559.06	0
893035	4585	-4088522	3588.16	72234.6	1560.15	0
888628	4585.4	-4092929	3588.56	72312.5	1561.12	0
882257	4583.8	-4099300	3586.96	72425	1562.09	0
895968	4585.8	-4085589	3588.96	72182.8	1563.06	0
891036	4585.4	-4090521	3588.56	72269.9	1564.14	0
891623	4585	-4089934	3588.16	72259.6	1565.11	0
889068	4584	-4092489	3587.16	72304.7	1566.08	0
893158	4585.5	-4088399	3588.66	72232.4	1567.16	0
882889	4584.1	-4098668	3587.26	72413.9	1568.13	0
893115	4584.1	-4088442	3587.26	72233.2	1569.1	0
890608	4585.5	-4090949	3588.66	72277.5	1570.07	0
904406	4584.9	-4077151	3588.06	72033.7	1571.15	0
895748	4586.4	-4085809	3589.56	72186.7	1572.12	0
896370	4586.4	-4085187	3589.56	72175.7	1573.09	0
887463	4585.6	-4094094	3588.76	72333.1	1574.17	0
890055	4583.7	-4091502	3586.86	72287.3	1575.14	0
874535	4583.8	-4107022	3586.96	72561.5	1576.11	0
896672	4585	-4084885	3588.16	72170.4	1577.08	0
883884	4585.1	-4097673	3588.26	72396.3	1578.16	0
889239	4584	-4092318	3587.16	72301.7	1579.13	0
885009	4584.6	-4096548	3587.76	72376.4	1580.1	0
889110	4584.4	-4092446	3587.56	72304	1581.08	0
892429	4585.5	-4089128	3588.66	72245.3	1582.16	0
891787	4585.5	-4089770	3588.66	72256.7	1583.13	0
896137	4585.2	-4085420	3588.36	72179.8	1584.1	0
880417	4585.6	-4101140	3588.76	72457.6	1585.18	0
890400	4583.6	-4091157	3586.76	72281.2	1586.15	0
894066	4585.1	-4087491	3588.26	72216.4	1587.12	0
886222	4585.2	-4095335	3588.36	72355	1588.09	0
884131	4584.2	-4097426	3587.36	72391.9	1589.17	0
887742	4584.7	-4093815	3587.86	72328.1	1590.14	0
900292	4585.6	-4081265	3588.76	72106.4	1591.11	0
893175	4585.6	-4088382	3588.76	72232.1	1592.19	0
899360	4586.2	-4082197	3589.36	72122.9	1593.16	0
889213	4585.5	-4092344	3588.66	72302.1	1594.13	0
900580	4586.2	-4080977	3589.36	72101.3	1595.1	0
885926	4585.1	-4095631	3588.26	72360.2	1596.18	0
889046	4584.7	-4092511	3587.86	72305.1	1597.15	0
891069	4584.7	-4090488	3587.86	72269.4	1598.12	0
885853	4585.9	-4095704	3589.06	72361.5	1599.09	0
891366	4585	-4090191	3588.16	72264.1	1600.17	0
890211	4585.1	-4091346	3588.26	72284.5	1601.15	0
886810	4585.1	-4094747	3588.26	72344.6	1602.12	0
884609	4585.6	-4096948	3588.76	72383.5	1603.2	0
888802	4584.9	-4092755	3588.06	72309.4	1604.17	0
897403	4586.1	-4084154	3589.26	72157.4	1605.14	0
892945	4584.9	-4088612	3588.06	72236.2	1606.11	0
895029	4586.3	-4086528	3589.46	72199.4	1607.19	0
892011	4585.5	-4089546	3588.66	72252.7	1608.16	0
885612	4585.8	-4095945	3588.96	72365.8	1609.13	0
883018	4584.9	-4098539	3588.06	72411.6	1610.1	0
888785	4586.3	-4092772	3589.46	72309.7	1611.18	0
888048	4586.3	-4093509	3589.46	72322.7	1612.15	0
894813	4585.4	-4086744	3588.56	72203.2	1613.12	0
898116	4585.7	-4083441	3588.86	72144.9	1614.2	0
902064	4586.3	-4079493	3589.46	72075.1	1615.17	0
879840	4585.8	-4101717	3588.96	72467.8	1616.14	0
900943	4584.1	-4080614	3587.26	72094.9	1617.11	0
894211	4586.5	-4087346	3589.66	72213.8	1618.19	0
889321	4585.8	-4092236	3588.96	72300.2	1619.16	0
893199	4584.8	-4088358	3587.96	72231.7	1620.13	0
894782	4586.1	-4086775	3589.26	72203.8	1621.22	0
895278	4585.2	-4086279	3588.36	72195	1622.18	0
907268	4586.4	-4074289	3589.56	71983.2	1623.15	0
899629	4586.8	-4081928	3589.96	72118.1	1624.12	0
897248	4585.7	-4084309	3588.86	72160.2	1625.2	0
890947	4585	-4090610	3588.16	72271.5	1626.17	0
895440	4585	-4086117	3588.16	72192.1	1627.14	0
889880	4585.9	-4091677	3589.06	72290.4	1628.22	0
893976	4584.8	-4087581	3587.96	72218	1629.19	0
894225	4585.7	-4087332	3588.86	72213.6	1630.16	0
890369	4585.1	-4091188	3588.26	72281.7	1631.13	0
883512	4585.2	-4098045	3588.36	72402.9	1632.21	0
891512	4584	-4090044	3587.16	72261.5	1633.18	0
902428	4585.5	-4079129	3588.66	72068.7	1634.15	0
895758	4585.8	-4085799	3588.96	72186.5	1635.12	0
893010	4585.4	-4088547	3588.56	72235.1	1636.21	0
883458	4584.9	-4098099	3588.06	72403.8	1637.18	0
889496	4585	-4092061	3588.16	72297.1	1638.15	0
895056	4585.6	-4086501	3588.76	72198.9	1639.23	0
895346	4585.7	-4086211	3588.86	72193.8	1640.2	0
890252	4584.9	-4091306	3588.06	72283.8	1641.17	0
889586	4584.9	-4091971	3588.06	72295.6	1642.14	0
896898	4584.9	-4084659	3588.06	72166.4	1643.23	0
899845	4586.4	-4081712	3589.56	72114.3	1644.2	0
887228	4586	-4094328	3589.16	72337.2	1645.17	0
896026	4584.8	-4085531	3587.96	72181.8	1646.14	0
895206	4586.5	-4086351	3589.66	72196.3	1647.22	0
892723	4585.5	-4088834	3588.66	72240.1	1648.19	0
895896	4585.8	-4085661	3588.96	72184.1	1649.16	0
884751	4585.5	-4096806	3588.66	72381	1650.13	0
902000	4585.5	-4079557	3588.66	72076.2	1651.22	0
895358	4585.1	-4086199	3588.26	72193.6	1652.19	0
897391	4585.9	-4084166	3589.06	72157.7	1653.16	0
896514	4586.1	-4085043	3589.26	72173.2	1654.25	0
893979	4585.8	-4087578	3588.96	72217.9	1655.21	0
899288	4585.8	-4082269	3588.96	72124.1	1656.19	0
897480	4585.8	-4084076	3588.96	72156.1	1657.16	0
891395	4585.8	-4090162	3588.96	72263.6	1658.24	0
883631	4584.7	-4097926	3587.86	72400.8	1659.21	0
888894	4584.6	-4092664	3587.76	72307.8	1660.18	0
882978	4586.2	-4098579	3589.36	72412.3	1661.15	0
881735	4584.7	-4099822	3587.86	72434.3	1662.23	0
880478	4584.8	-4101079	3587.96	72456.5	1663.2	0
889478	4584.9	-4092079	3588.06	72297.5	1664.17	0
892093	4586.7	-4089464	3589.86	72251.3	1665.15	0
883873	4586.6	-4097684	3589.76	72396.5	1666.23	0
884712	4587	-4096845	3590.16	72381.7	1667.2	0
883692	4585.6	-4097865	3588.76	72399.7	1668.17	0
883442	4585.6	-4098115	3588.76	72404.1	1669.26	0
887091	4586	-4094466	3589.16	72339.6	1670.23	0
888052	4586	-4093505	3589.16	72322.7	1671.19	0
886941	4586.2	-4094616	3589.36	72342.3	1672.16	0
892757	4584.9	-4088800	3588.06	72239.5	1673.24	0
883884	4586.3	-4097673	3589.46	72396.3	1674.21	0
883456	4586.3	-4098101	3589.46	72403.9	1675.18	0
884098	4586.8	-4097459	3589.96	72392.5	1676.27	0
885947	4585.7	-4095610	3588.86	72359.8	1677.23	0
891045	4587.1	-4090512	3590.26	72269.8	1678.2	0
882328	4586.5	-4099229	3589.66	72423.8	1679.17	0
892901	4585.2	-4088656	3588.36	72237	1680.26	0
897338	4587.1	-4084219	3590.26	72158.6	1681.23	0
893737	4585.7	-4087820	3588.86	72222.2	1682.19	0
892314	4585.6	-4089243	3588.76	72247.4	1683.17	0
891752	4585.3	-4089805	3588.46	72257.3	1684.25	0
893438	4586.1	-4088119	3589.26	72227.5	1685.22	0
892702	4586.1	-4088855	3589.26	72240.5	1686.19	0
883956	4585.4	-4097601	3588.56	72395	1687.27	0
889564	4584.7	-4091992	3587.86	72295.9	1688.24	0
897866	4585.7	-4083691	3588.86	72149.3	1689.21	0
889099	4586.3	-4092458	3589.46	72304.2	1690.18	0
890908	4584.8	-4090649	3587.96	72272.2	1691.27	0
890166	4585.6	-4091391	3588.76	72285.3	1692.23	0
905263	4585.5	-4076294	3588.66	72018.6	1693.2	0
895996	4586.4	-4085561	3589.56	72182.3	1694.17	0
909315	4588.1	-4072242	3591.26	71947	1695.26	0
889797	4585.5	-4091760	3588.66	72291.8	1696.23	0
891958	4585	-4089599	3588.16	72253.6	1697.2	0
893804	4585.2	-4087753	3588.36	72221	1698.18	0
894863	4585.9	-4086694	3589.06	72202.3	1699.27	0
905180	4587.4	-4076377	3590.56	72020.1	1700.24	0
894468	4587.4	-4087089	3590.56	72209.3	1701.2	0
894815	4585.6	-4086742	3588.76	72203.2	1702.17	0
889726	4586.3	-4091831	3589.46	72293.1	1703.26	0
891061	4585.6	-4090496	3588.76	72269.5	1704.23	0
894772	4585.8	-4086785	3588.96	72203.9	1705.2	0
897181	4585.2	-4084376	3588.36	72161.4	1706.29	0
888664	4585.9	-4092893	3589.06	72311.9	1707.26	0
891036	4585.4	-4090521	3588.56	72269.9	1708.22	0
893381	4584.9	-4088176	3588.06	72228.5	1709.19	0
885286	4584.8	-4096271	3587.96	72371.5	1710.28	0
895984	4585.9	-4085573	3589.06	72182.5	1711.24	0
885347	4585.1	-4096210	3588.26	72370.4	1712.21	0
890505	4584.9	-4091052	3588.06	72279.3	1713.18	0
891920	4585.4	-4089637	3588.56	72254.3	1714.27	0
888109	4585.4	-4093448	3588.56	72321.6	1715.23	0
887602	4585.1	-4093955	3588.26	72330.6	1716.2	0
898278	4585.3	-4083279	3588.46	72142	1717.29	0
899474	4585.9	-4082083	3589.06	72120.9	1718.26	0
892205	4586.1	-4089352	3589.26	72249.3	1719.23	0
890706	4585.4	-4090851	3588.56	72275.8	1720.19	0
893838	4585.6	-4087719	3588.76	72220.4	1721.28	0
893067	4584.4	-4088490	3587.56	72234.1	1722.24	0
895170	4586.6	-4086387	3589.76	72196.9	1723.22	0
894332	4584.9	-4087225	3588.06	72211.7	1724.3	0
897335	4586.3	-4084222	3589.46	72158.6	1725.28	0
887923	4585.6	-4093634	3588.76	72324.9	1726.24	0
894793	4586	-4086764	3589.16	72203.6	1727.21	0
887378	4585.8	-4094179	3588.96	72334.6	1728.3	0
887437	4585.2	-4094120	3588.36	72333.5	1729.27	0
890048	4585.2	-4091509	3588.36	72287.4	1730.24	0
894344	4585.6	-4087213	3588.76	72211.5	1731.2	0
890654	4585.4	-4090903	3588.56	72276.7	1732.29	0
889300	4585.5	-4092257	3588.66	72300.6	1733.26	0
889014	4585.5	-4092543	3588.66	72305.7	1734.23	0
890167	4585.2	-4091390	3588.36	72285.3	1735.2	0
901052	4586.7	-4080505	3589.86	72093	1736.29	0
894876	4586.3	-4086681	3589.46	72202.1	1737.26	0
894848	4586.5	-4086709	3589.66	72202.6	1738.22	0
896092	4585.4	-4085465	3588.56	72180.6	1739.31	0
898629	4586.5	-4082928	3589.66	72135.8	1740.28	0
897254	4585.9	-4084303	3589.06	72160.1	1741.24	0
889957	4585.4	-4091600	3588.56	72289	1742.22	0
892978	4585.7	-4088579	3588.86	72235.6	1743.3	0
901317	4586	-4080240	3589.16	72088.3	1744.27	0
886871	4586	-4094686	3589.16	72343.5	1745.24	0
888630	4584.9	-4092927	3588.06	72312.4	1746.22	0
896666	4585.6	-4084891	3588.76	72170.5	1747.3	0
894888	4586.2	-4086669	3589.36	72201.9	1748.27	0
892420	4586	-4089137	3589.16	72245.5	1749.24	0
892711	4584.8	-4088846	3587.96	72240.3	1750.22	0
894706	4586.3	-4086851	3589.46	72205.1	1751.3	0
902666	4586	-4078891	3589.16	72064.5	1752.28	0
895373	4587.3	-4086184	3590.46	72193.3	1753.24	0
892711	4585.5	-4088846	3588.66	72240.3	1754.33	0
892349	4585.9	-4089208	3589.06	72246.8	1755.3	0
889222	4585.1	-4092335	3588.26	72302	1756.27	0
894984	4586	-4086573	3589.16	72200.2	1757.24	0
891150	4586	-4090407	3589.16	72267.9	1758.33	0
898517	4586	-4083040	3589.16	72137.8	1759.3	0
890867	4586.7	-4090690	3589.86	72272.9	1760.27	0
897072	4585.5	-4084485	3588.66	72163.3	1761.23	0
895506	4586.1	-4086051	3589.26	72191	1762.32	0
891686	4586	-4089871	3589.16	72258.4	1763.29	0
897587	4585.6	-4083970	3588.76	72154.2	1764.26	0
892327	4586	-4089230	3589.16	72247.1	1765.23	0
889642	4586.5	-4091915	3589.66	72294.6	1766.31	0
893799	4585	-4087758	3588.16	72221.1	1767.28	0
893524	4586.3	-4088033	3589.46	72226	1768.25	0
891460	4585.7	-4090097	3588.86	72262.4	1769.34	0
894256	4586.2	-4087301	3589.36	72213.1	1770.31	0
896721	4585.6	-4084836	3588.76	72169.5	1771.28	0
900559	4586.5	-4080998	3589.66	72101.7	1772.24	0
896237	4586.3	-4085320	3589.46	72178.1	1773.33	0
899118	4586.3	-4082439	3589.46	72127.1	1774.3	0
892138	4586.5	-4089419	3589.66	72250.5	1775.27	0
896358	4585.9	-4085200	3589.06	72175.9	1776.24	0
905085	4586.5	-4076472	3589.66	72021.7	1777.32	0
895897	4585.8	-4085660	3588.96	72184.1	1778.29	0
887072	4586.4	-4094485	3589.56	72340	1779.26	0
889943	4585.4	-4091614	3588.56	72289.2	1780.35	0
895364	4585.4	-4086193	3588.56	72193.5	1781.32	0
895537	4586.3	-4086020	3589.46	72190.4	1782.29	0
896817	4585.7	-4084740	3588.86	72167.8	1783.26	0
889696	4586.5	-4091861	3589.66	72293.6	1784.34	0
891683	4585	-4089874	3588.16	72258.5	1785.31	0
894452	4585.7	-4087105	3588.86	72209.6	1786.28	0
898237	4586.7	-4083320	3589.86	72142.7	1787.25	0
894631	4585.9	-4086926	3589.06	72206.4	1788.33	0
900356	4585.9	-4081201	3589.06	72105.3	1789.3	0
895068	4586.9	-4086489	3590.06	72198.7	1790.27	0
896065	4586.2	-4085492	3589.36	72181.1	1791.36	0
898011	4585.8	-4083546	3588.96	72146.7	1792.33	0
895176	4586	-4086381	3589.16	72196.8	1793.3	0
894380	4586.4	-4087177	3589.56	72210.9	1794.27	0
898171	4586	-4083386	3589.16	72143.9	1795.35	0
887650	4585.7	-4093907	3588.86	72329.8	1796.32	0
888301	4584.1	-4093256	3587.26	72318.3	1797.29	0
890902	4585.9	-4090655	3589.06	72272.3	1798.26	0
894787	4585.4	-4086770	3588.56	72203.7	1799.35	0
893347	4585.8	-4088210	3588.96	72229.1	1800.32	0
896289	4586.2	-4085268	3589.36	72177.1	1801.29	0
897486	4586.2	-4084071	3589.36	72156	1802.26	0
892545	4586.2	-4089012	3589.36	72243.3	1803.35	0
896547	4585.9	-4085010	3589.06	72172.6	1804.32	0
896182	4586.3	-4085375	3589.46	72179	1805.29	0
903555	4586.7	-4078002	3589.86	72048.8	1806.37	0
892342	4586.5	-4089215	3589.66	72246.9	1807.34	0
891227	4586.9	-4090330	3590.06	72266.6	1808.31	0
891739	4585.4	-4089818	3588.56	72257.5	1809.28	0
897149	4586	-4084408	3589.16	72161.9	1810.36	0
899547	4587.3	-4082010	3590.46	72119.6	1811.33	0
897508	4586.4	-4084049	3589.56	72155.6	1812.3	0
892539	4586.2	-4089018	3589.36	72243.4	1813.27	0
897924	4585.9	-4083633	3589.06	72148.2	1814.36	0
895919	4586.1	-4085638	3589.26	72183.7	1815.33	0
897779	4586.4	-4083778	3589.56	72150.8	1816.3	0
891807	4586.4	-4089750	3589.56	72256.3	1817.27	0
892562	4586	-4088995	3589.16	72243	1818.35	0
898432	4585.8	-4083125	3588.96	72139.3	1819.33	0
891462	4586.6	-4090095	3589.76	72262.4	1820.3	0
900123	4586.2	-4081434	3589.36	72109.4	1821.38	0
891399	4586.9	-4090158	3590.06	72263.5	1822.35	0
886779	4585.5	-4094778	3588.66	72345.1	1823.32	0
901518	4585.8	-4080039	3588.96	72084.8	1824.29	0
892724	4586.6	-4088833	3589.76	72240.1	1825.37	0
896865	4586.4	-4084692	3589.56	72166.9	1826.34	0
897835	4586.1	-4083722	3589.26	72149.8	1827.31	0
891168	4586.1	-4090389	3589.26	72267.6	1828.29	0
892483	4585.7	-4089074	3588.86	72244.4	1829.37	0
903155	4587.2	-4078402	3590.36	72055.8	1830.34	0
897072	4586.8	-4084485	3589.96	72163.3	1831.31	0
887825	4585	-4093732	3588.16	72326.7	1832.39	0
884752	4585	-4096805	3588.16	72381	1833.36	0
897321	4585.1	-4084236	3588.26	72158.9	1834.33	0
893905	4586.1	-4087652	3589.26	72219.2	1835.3	0
901246	4586.3	-4080311	3589.46	72089.6	1836.38	0
900646	4587.6	-4080911	3590.76	72100.1	1837.35	0
891037	4586.6	-4090520	3589.76	72269.9	1838.32	0
898330	4586.7	-4083227	3589.86	72141.1	1839.29	0
900808	4587.3	-4080749	3590.46	72097.3	1840.38	0
896414	4586.5	-4085143	3589.66	72174.9	1841.35	0
902314	4587.3	-4079243	3590.46	72070.7	1842.32	0
896558	4586.9	-4084999	3590.06	72172.4	1843.3	0
895474	4586.1	-4086083	3589.26	72191.5	1844.38	0
895112	4586.7	-4086445	3589.86	72197.9	1845.35	0
901110	4587.5	-4080447	3590.66	72092	1846.32	0
892030	4585.7	-4089526	3588.86	72252.4	1847.4	0
898046	4585.7	-4083511	3588.86	72146.1	1848.37	0
897539	4586.7	-4084018	3589.86	72155.1	1849.34	0
898212	4586.7	-4083345	3589.86	72143.2	1850.31	0
898526	4586.8	-4083031	3589.96	72137.6	1851.39	0
894825	4586.7	-4086732	3589.86	72203	1852.36	0
897068	4586.5	-4084489	3589.66	72163.4	1853.33	0
895368	4587.1	-4086189	3590.26	72193.4	1854.41	0
894764	4586.2	-4086793	3589.36	72204.1	1855.38	0
901131	4586.3	-4080426	3589.46	72091.6	1856.35	0
890787	4586.6	-4090770	3589.76	72274.3	1857.32	0
901131	4587	-4080426	3590.16	72091.6	1858.4	0
897212	4586.7	-4084345	3589.86	72160.8	1859.37	0
894400	4586.8	-4087157	3589.96	72210.5	1860.34	0
888222	4586.8	-4093335	3589.96	72319.7	1861.32	0
894224	4586.2	-4087333	3589.36	72213.6	1862.4	0
900236	4586.5	-4081321	3589.66	72107.4	1863.37	0
892864	4587.4	-4088693	3590.56	72237.6	1864.34	0
899747	4586.6	-4081810	3589.76	72116	1865.31	0
895064	4587.5	-4086493	3590.66	72198.8	1866.4	0
888178	4586.7	-4093379	3589.86	72320.4	1867.37	0
897237	4585.9	-4084320	3589.06	72160.4	1868.34	0
900301	4587.4	-4081256	3590.56	72106.2	1869.42	0
898509	4587.7	-4083048	3590.86	72137.9	1870.39	0
897448	4588.1	-4084109	3591.26	72156.6	1871.36	0
897853	4587.4	-4083704	3590.56	72149.5	1872.33	0
901579	4588.2	-4079978	3591.36	72083.7	1873.41	0
891387	4587.1	-4090170	3590.26	72263.7	1874.38	0
896706	4587.5	-4084851	3590.66	72169.8	1875.36	0
897173	4587.5	-4084384	3590.66	72161.5	1876.33	0
894210	4587.9	-4087347	3591.06	72213.9	1877.41	0
889873	4587	-4091684	3590.16	72290.5	1878.38	0
898916	4586.9	-4082642	3590.06	72130.7	1879.35	0
898506	4587.9	-4083051	3591.06	72137.9	1880.43	0
898922	4587.6	-4082635	3590.76	72130.6	1881.4	0
894890	4586.7	-4086667	3589.86	72201.8	1882.37	0
891931	4586.6	-4089626	3589.76	72254.1	1883.34	0
894460	4587.2	-4087098	3590.36	72209.4	1884.43	0
896877	4586.9	-4084680	3590.06	72166.7	1885.4	0
896110	4587.3	-4085447	3590.46	72180.3	1886.37	0
895165	4586.4	-4086392	3589.56	72197	1887.34	0
892495	4586.9	-4089062	3590.06	72244.2	1888.43	0
893800	4586.5	-4087757	3589.66	72221.1	1889.4	0
892125	4586.4	-4089432	3589.56	72250.7	1890.37	0
888210	4586.4	-4093347	3589.56	72319.9	1891.34	0
889913	4586.5	-4091644	3589.66	72289.8	1892.43	0
894536	4586.2	-4087021	3589.36	72208.1	1893.4	0
895086	4587.1	-4086471	3590.26	72198.4	1894.37	0
894816	4586.4	-4086740	3589.56	72203.1	1895.34	0
896798	4587.2	-4084759	3590.36	72168.1	1896.43	0
896375	4587.7	-4085182	3590.86	72175.6	1897.4	0
890122	4586.7	-4091435	3589.86	72286.1	1898.37	0
894756	4586	-4086801	3589.16	72204.2	1899.34	0
892889	4587.5	-4088668	3590.66	72237.2	1900.42	0
888873	4586.3	-4092684	3589.46	72308.1	1901.4	0
902120	4588	-4079437	3591.16	72074.1	1902.37	0
893221	4586.9	-4088336	3590.06	72231.3	1903.45	0
889314	4586.3	-4092243	3589.46	72300.4	1904.42	0
886438	4586.3	-4095119	3589.46	72351.2	1905.39	0
895384	4586.3	-4086173	3589.46	72193.1	1906.36	0
893405	4587	-4088152	3590.16	72228.1	1907.44	0
891186	4587.3	-4090371	3590.46	72267.3	1908.41	0
891318	4586.7	-4090239	3589.86	72264.9	1909.38	0
894139	4586.3	-4087418	3589.46	72215.1	1910.35	0
891030	4586.6	-4090527	3589.76	72270	1911.44	0
891478	4587.2	-4090079	3590.36	72262.1	1912.41	0
894317	4586.5	-4087240	3589.66	72212	1913.38	0
896089	4586.2	-4085468	3589.36	72180.7	1914.35	0
897050	4587	-4084507	3590.16	72163.7	1915.44	0
892515	4587.5	-4089042	3590.66	72243.8	1916.41	0
899525	4587.3	-4082032	3590.46	72120	1917.38	0
898967	4587.6	-4082590	3590.76	72129.8	1918.46	0
893910	4586.9	-4087647	3590.06	72219.2	1919.43	0
888999	4586.9	-4092558	3590.06	72305.9	1920.4	0
891679	4587.1	-4089878	3590.26	72258.6	1921.37	0
891025	4586.7	-4090532	3589.86	72270.1	1922.45	0
894922	4586.6	-4086635	3589.76	72201.3	1923.42	0
888154	4586.4	-4093403	3589.56	72320.9	1924.4	0
902722	4586.7	-4078835	3589.86	72063.5	1925.37	0
894872	4587.9	-4086685	3591.06	72202.2	1926.45	0
882647	4585.5	-4098910	3588.66	72418.2	1927.42	0
892553	4586.4	-4089004	3589.56	72243.1	1928.39	0
900825	4588.1	-4080732	3591.26	72097	1929.47	0
889528	4585.8	-4092029	3588.96	72296.6	1930.44	0
901127	4588.1	-4080430	3591.26	72091.7	1931.41	0
896792	4587.6	-4084765	3590.76	72168.2	1932.38	0
888050	4586.4	-4093507	3589.56	72322.7	1933.46	0
895764	4587.1	-4085793	3590.26	72186.4	1934.43	0
896100	4587.1	-4085457	3590.26	72180.5	1935.4	0
889906	4587.7	-4091651	3590.86	72289.9	1936.37	0
898481	4586	-4083076	3589.16	72138.4	1937.45	0
897155	4587	-4084402	3590.16	72161.8	1938.42	0
895527	4587.5	-4086030	3590.66	72190.6	1939.39	0
889123	4586.8	-4092434	3589.96	72303.7	1940.47	0
896572	4586	-4084985	3589.16	72172.1	1941.44	0
898137	4586.8	-4083420	3589.96	72144.5	1942.41	0
896950	4587.4	-4084607	3590.56	72165.4	1943.38	0
897951	4587.8	-4083606	3590.96	72147.8	1944.47	0
894430	4586.4	-4087127	3589.56	72210	1945.44	0
895694	4587.6	-4085863	3590.76	72187.6	1946.41	0
891867	4586.4	-4089690	3589.56	72255.3	1947.38	0
900066	4587.6	-4081490	3590.76	72110.4	1948.47	0
894014	4587	-4087543	3590.16	72217.3	1949.44	0
902400	4587	-4079157	3590.16	72069.2	1950.41	0
892285	4587.8	-4089272	3590.96	72247.9	1951.39	0
889871	4586.8	-4091686	3589.96	72290.5	1952.47	0
888860	4586.8	-4092697	3589.96	72308.4	1953.44	0
901816	4586.6	-4079741	3589.76	72079.5	1954.41	0
897043	4587.3	-4084514	3590.46	72163.8	1955.39	0
895924	4587.6	-4085633	3590.76	72183.6	1956.47	0
893553	4586.7	-4088004	3589.86	72225.5	1957.44	0
900193	4587.3	-4081364	3590.46	72108.2	1958.41	0
897536	4587.5	-4084021	3590.66	72155.1	1959.49	0
897928	4587.2	-4083629	3590.36	72148.2	1960.46	0
896318	4588.2	-4085239	3591.36	72176.6	1961.43	0
899514	4588.1	-4082043	3591.26	72120.1	1962.4	0
894340	4587	-4087217	3590.16	72211.6	1963.48	0
900277	4587	-4081280	3590.16	72106.7	1964.45	0
898121	4587.8	-4083436	3590.96	72144.8	1965.42	0
894395	4587.2	-4087162	3590.36	72210.6	1966.4	0
892249	4587.4	-4089308	3590.56	72248.5	1967.48	0
902942	4587.2	-4078615	3590.36	72059.6	1968.45	0
898069	4587.7	-4083488	3590.86	72145.7	1969.42	0
898896	4587.8	-4082661	3590.96	72131.1	1970.4	0
895608	4587.6	-4085949	3590.76	72189.2	1971.48	0
894849	4587.3	-4086708	3590.46	72202.6	1972.45	0
896076	4587.1	-4085481	3590.26	72180.9	1973.42	0
893139	4587.4	-4088418	3590.56	72232.8	1974.51	0
902199	4587.9	-4079358	3591.06	72072.7	1975.48	0
901459	4587.9	-4080098	3591.06	72085.8	1976.44	0
1.06246e+06	4593.1	-3919098	3596.26	69241.3	1977.41	0
2147967	4596.5	-2833590	3599.66	50062.9	1978.5	0
4.68961e+06	4596.5	-291943	3599.66	5157.95	1979.47	0
4.98418e+06	3750.1	2627.4	2753.26	-46.42	1980.44	0
4.98403e+06	3461.5	2476.4	2464.66	-43.7522	1981.41	0
4.98389e+06	3307.2	2333.1	2310.36	-41.2204	1982.5	0
4.98376e+06	3193.3	2204.3	2196.46	-38.9448	1983.47	0
4.98365e+06	3099.6	2091.6	2102.76	-36.9537	1984.44	0
4.98355e+06	3026.7	1993.2	2029.86	-35.2152	1985.41	0
4.98346e+06	2971.9	1901.7	1975.06	-33.5986	1986.5	0
4983378	2933.4	1821	1936.56	-32.1728	1987.47	0
4.98331e+06	2907.2	1750.3	1910.36	-30.9237	1988.44	0
4.98324e+06	2890.1	1685.4	1893.26	-29.7771	1989.41	0
4.98319e+06	2882.4	1631.9	1885.56	-28.8319	1990.5	0
4.98314e+06	2876.2	1586.3	1879.36	-28.0262	1991.47	0
4.98311e+06	2873.4	1551.7	1876.56	-27.4149	1992.44	0
4.98308e+06	2873	1525.1	1876.16	-26.9449	1993.53	0
4983063	2873	1506	1876.16	-26.6075	1994.5	0
4.98305e+06	2874.5	1495.1	1877.66	-26.4149	1995.46	0
[truncated: 919 more rows]

## Sheet: Cont. mode_1
SRS QCM200 Data File							the droplet is cooled simultaneously with the soot coated QCM surface
Data Taken on 1/27/2021 at 1:39:23 PM							the droplet's recalescent freezing is marked as the first value of frequency increase following the observed temperature-induced frequency decrease
Tag Definitions							the droplet's initial thawing is marked as the first frequency value after getting back to resonance
Zero Rel F = 1							the droplet's full thawing is marked as the last frequency value, where steady signal fluctuations occur
Zero Rel R = 2
Zero Rel F and R = 3							The above legend applies to all three contour freezing assays
User Tag = 4
Begining of File = 5
The Sauerbrey model was used to calculate the relative mass change.
Notes:
Raw F (Hz)	Raw R (Ohms)	Delta F (Hz)	Delta R (Ohms)	Delta Mass (ug/cm2)	Time (s)	Tag
4.98127e+06	1498.3	0	0	0	0.049	5
4.98127e+06	1498.3	0	0	0	13.874	0
4.98127e+06	1498.3	0	0	0	14.622	0
4.98127e+06	1498.3	0	0	0	15.712	0
4.98127e+06	1498.3	0	0	0	16.687	0
4.98127e+06	1498.3	0	0	0	17.665	0
4.98127e+06	1498.3	0.1	0	-0.00176677	18.644	0
4.98127e+06	1498.3	0	0	0	19.624	0
4.98127e+06	1498.2	0	-0.1	0	20.716	0
4.98127e+06	1498.2	0	-0.1	0	21.694	0
4.98127e+06	1498.2	0.1	-0.1	-0.00176677	22.665	0
4.98127e+06	1498.2	0.1	-0.1	-0.00176677	23.643	0
4.98127e+06	1498.2	0	-0.1	0	24.618	0
4.98127e+06	1498.2	0.1	-0.1	-0.00176677	25.707	0
4.98127e+06	1498.2	0.2	-0.1	-0.00353353	26.677	0
4.98127e+06	1498.2	0	-0.1	0	27.657	0
4.98127e+06	1498.2	0.2	-0.1	-0.00353353	28.628	0
4.98127e+06	1498.2	0	-0.1	0	29.717	0
4.98127e+06	1498.2	0.2	-0.1	-0.00353353	30.688	0
4.98127e+06	1498.2	0.1	-0.1	-0.00176677	31.665	0
4.98127e+06	1498.2	0.1	-0.1	-0.00176677	32.635	0
4.98127e+06	1498.2	0.2	-0.1	-0.00353353	33.73	0
4.98127e+06	1498.2	0.2	-0.1	-0.00353353	34.703	0
4.98127e+06	1498.2	0	-0.1	0	35.677	0
4.98127e+06	1498.2	0	-0.1	0	36.648	0
4.98127e+06	1498.2	0.1	-0.1	-0.00176677	37.629	0
4.98127e+06	1498.2	0.1	-0.1	-0.00176677	38.715	0
4.98127e+06	1498.2	0.1	-0.1	-0.00176677	39.69	0
4.98127e+06	1498.2	0	-0.1	0	40.663	0
4.98127e+06	1498.2	0.2	-0.1	-0.00353353	41.642	0
4.98127e+06	1498.2	0.1	-0.1	-0.00176677	42.73	0
4.98127e+06	1498.2	0.1	-0.1	-0.00176677	43.707	0
4.98127e+06	1498.2	0.1	-0.1	-0.00176677	44.677	0
4.98127e+06	1498.2	0.1	-0.1	-0.00176677	45.648	0
4.98127e+06	1498.2	0.2	-0.1	-0.00353353	46.74	0
4.98127e+06	1498.2	0.1	-0.1	-0.00176677	47.711	0
4.98127e+06	1498.2	0.2	-0.1	-0.00353353	48.687	0
4.98127e+06	1498.2	0.2	-0.1	-0.00353353	49.658	0
4.98127e+06	1498.2	0.1	-0.1	-0.00176677	50.744	0
4.98127e+06	1498.2	0.2	-0.1	-0.00353353	51.718	0
4.98127e+06	1498.2	0.2	-0.1	-0.00353353	52.689	0
4.98127e+06	1498.2	0.2	-0.1	-0.00353353	53.662	0
4.98127e+06	1498.2	0.1	-0.1	-0.00176677	54.748	0
4.98127e+06	1498.3	0.2	0	-0.00353353	55.718	0
4.98127e+06	1498.3	0.2	0	-0.00353353	56.697	0
4.98127e+06	1498.2	0.2	-0.1	-0.00353353	57.666	0
4.98127e+06	1498.3	0.2	0	-0.00353353	58.75	0
4.98127e+06	1498.3	0.2	0	-0.00353353	59.718	0
4.98127e+06	1498.3	0.2	0	-0.00353353	60.689	0
4.98127e+06	1498.3	0.2	0	-0.00353353	61.666	0
4.98127e+06	1498.2	0.2	-0.1	-0.00353353	62.75	0
4.98127e+06	1498.2	0.2	-0.1	-0.00353353	63.718	0
4.98127e+06	1498.2	0.2	-0.1	-0.00353353	64.689	0
4.98127e+06	1498.2	0.2	-0.1	-0.00353353	65.662	0
4.98127e+06	1498.2	0.2	-0.1	-0.00353353	66.75	0
4.98127e+06	1498.2	0.2	-0.1	-0.00353353	67.718	0
4.98127e+06	1498.2	0.2	-0.1	-0.00353353	68.689	0
4.98127e+06	1498.2	0.2	-0.1	-0.00353353	69.662	0
4.98127e+06	1498.2	0.2	-0.1	-0.00353353	70.748	0
4.98127e+06	1498.2	0.2	-0.1	-0.00353353	71.726	0
4.98127e+06	1498.2	0.3	-0.1	-0.0053003	72.697	0
4.98127e+06	1498.2	0.3	-0.1	-0.0053003	73.667	0
4.98127e+06	1498.2	0.3	-0.1	-0.0053003	74.749	0
4.98127e+06	1498.2	0.3	-0.1	-0.0053003	75.719	0
4.98127e+06	1498.2	0.4	-0.1	-0.00706706	76.698	0
4.98127e+06	1498.2	0.4	-0.1	-0.00706706	77.67	0
4.98127e+06	1498.2	0.4	-0.1	-0.00706706	78.756	0
4.98127e+06	1498.2	0.3	-0.1	-0.0053003	79.728	0
4.98127e+06	1498.2	0.2	-0.1	-0.00353353	80.699	0
4.98127e+06	1498.2	0.4	-0.1	-0.00706706	81.676	0
4.98127e+06	1498.2	0.3	-0.1	-0.0053003	82.76	0
4.98127e+06	1498.2	0.4	-0.1	-0.00706706	83.731	0
4.98127e+06	1498.2	0.4	-0.1	-0.00706706	84.704	0
4.98127e+06	1498.2	0.3	-0.1	-0.0053003	85.676	0
4.98127e+06	1498.2	0.4	-0.1	-0.00706706	86.771	0
4.98127e+06	1498.2	0.3	-0.1	-0.0053003	87.744	0
4.98127e+06	1498.2	0.4	-0.1	-0.00706706	88.716	0
4.98127e+06	1498.2	0.4	-0.1	-0.00706706	89.687	0
4.98127e+06	1498.2	0.4	-0.1	-0.00706706	90.773	0
4.98127e+06	1498.2	0.4	-0.1	-0.00706706	91.749	0
4.98127e+06	1498.2	0.4	-0.1	-0.00706706	92.719	0
4.98127e+06	1498.2	0.4	-0.1	-0.00706706	93.69	0
4.98127e+06	1498.2	0.4	-0.1	-0.00706706	94.778	0
4.98127e+06	1498.2	0.4	-0.1	-0.00706706	95.749	0
4.98127e+06	1498.2	0.4	-0.1	-0.00706706	96.727	0
4.98127e+06	1498.2	0.4	-0.1	-0.00706706	97.698	0
4.98127e+06	1498.2	0.4	-0.1	-0.00706706	98.782	0
4.98127e+06	1498.2	0.4	-0.1	-0.00706706	99.753	0
4.98127e+06	1498.3	0.4	0	-0.00706706	100.723	0
4.98127e+06	1498.2	0.3	-0.1	-0.0053003	101.7	0
4.98127e+06	1498.2	0.4	-0.1	-0.00706706	102.782	0
4.98127e+06	1498.2	0.4	-0.1	-0.00706706	103.753	0
4.98127e+06	1498.2	0.4	-0.1	-0.00706706	104.723	0
4.98127e+06	1498.2	0.4	-0.1	-0.00706706	105.696	0
4.98127e+06	1498.2	0.4	-0.1	-0.00706706	106.782	0
4.98127e+06	1498.3	0.4	0	-0.00706706	107.753	0
4.98127e+06	1498.2	0.4	-0.1	-0.00706706	108.723	0
4.98127e+06	1498.2	0.4	-0.1	-0.00706706	109.696	0
4.98127e+06	1498.2	0.4	-0.1	-0.00706706	110.782	0
4.98127e+06	1498.2	0.4	-0.1	-0.00706706	111.76	0
4.98127e+06	1498.2	0.4	-0.1	-0.00706706	112.731	0
4.98127e+06	1498.2	0.5	-0.1	-0.00883383	113.704	0
4.98127e+06	1498.2	0.4	-0.1	-0.00706706	114.789	0
4.98127e+06	1498.2	0.5	-0.1	-0.00883383	115.759	0
4.98127e+06	1498.2	0.4	-0.1	-0.00706706	116.73	0
4.98127e+06	1498.2	0.5	-0.1	-0.00883383	117.703	0
4.98127e+06	1498.2	0.4	-0.1	-0.00706706	118.789	0
4.98127e+06	1498.2	0.4	-0.1	-0.00706706	119.759	0
4.98127e+06	1498.2	0.4	-0.1	-0.00706706	120.73	0
4.98127e+06	1498.2	0.5	-0.1	-0.00883383	121.708	0
4.98127e+06	1498.2	0.5	-0.1	-0.00883383	122.792	0
4.98127e+06	1498.2	0.5	-0.1	-0.00883383	123.76	0
4.98127e+06	1498.2	0.5	-0.1	-0.00883383	124.731	0
4.98127e+06	1498.2	0.5	-0.1	-0.00883383	125.706	0
4.98127e+06	1498.2	0.5	-0.1	-0.00883383	126.79	0
4.98127e+06	1498.2	0.5	-0.1	-0.00883383	127.76	0
4.98127e+06	1498.2	0.5	-0.1	-0.00883383	128.731	0
4.98127e+06	1498.2	0.5	-0.1	-0.00883383	129.704	0
4.98127e+06	1498.2	0.5	-0.1	-0.00883383	130.79	0
4.98127e+06	1498.2	0.5	-0.1	-0.00883383	131.768	0
4.98127e+06	1498.2	0.5	-0.1	-0.00883383	132.739	0
4.98127e+06	1498.2	0.5	-0.1	-0.00883383	133.708	0
4.98127e+06	1498.2	0.5	-0.1	-0.00883383	134.792	0
4.98127e+06	1498.2	0.5	-0.1	-0.00883383	135.76	0
4.98127e+06	1498.2	0.5	-0.1	-0.00883383	136.731	0
4.98127e+06	1498.2	0.5	-0.1	-0.00883383	137.819	0
4.98127e+06	1498.2	0.5	-0.1	-0.00883383	138.79	0
4.98127e+06	1498.2	0.5	-0.1	-0.00883383	139.76	0
4.98127e+06	1498.2	0.5	-0.1	-0.00883383	140.731	0
4.98127e+06	1498.2	0.5	-0.1	-0.00883383	141.822	0
4.98127e+06	1498.2	0.5	-0.1	-0.00883383	142.791	0
4.98127e+06	1498.2	0.5	-0.1	-0.00883383	143.761	0
4.98127e+06	1498.2	0.5	-0.1	-0.00883383	144.734	0
4.98127e+06	1498.2	0.5	-0.1	-0.00883383	145.822	0
4.98127e+06	1498.2	0.5	-0.1	-0.00883383	146.791	0
4.98127e+06	1498.2	0.5	-0.1	-0.00883383	147.761	0
4.98127e+06	1498.2	0.5	-0.1	-0.00883383	148.734	0
4.98127e+06	1498.2	0.5	-0.1	-0.00883383	149.822	0
4.98127e+06	1498.2	0.5	-0.1	-0.00883383	150.791	0
4981271	1498.2	0.6	-0.1	-0.0106006	151.769	0
4981271	1498.2	0.6	-0.1	-0.0106006	152.741	0
4981271	1498.2	0.6	-0.1	-0.0106006	153.825	0
4.98127e+06	1498.2	0.5	-0.1	-0.00883383	154.798	0
4.98127e+06	1498.2	0.5	-0.1	-0.00883383	155.77	0
4981271	1498.2	0.6	-0.1	-0.0106006	156.741	0
4981271	1498.2	0.6	-0.1	-0.0106006	157.825	0
4981271	1498.2	0.6	-0.1	-0.0106006	158.798	0
4981271	1498.2	0.6	-0.1	-0.0106006	159.77	0
4981271	1498.2	0.6	-0.1	-0.0106006	160.741	0
4981271	1498.2	0.6	-0.1	-0.0106006	161.832	0
4981271	1498.2	0.6	-0.1	-0.0106006	162.802	0
4981271	1498.2	0.6	-0.1	-0.0106006	163.773	0
4981271	1498.2	0.6	-0.1	-0.0106006	164.746	0
4981271	1498.2	0.6	-0.1	-0.0106006	165.832	0
4981271	1498.2	0.6	-0.1	-0.0106006	166.802	0
4981271	1498.2	0.6	-0.1	-0.0106006	167.773	0
4981271	1498.2	0.6	-0.1	-0.0106006	168.746	0
4981271	1498.2	0.6	-0.1	-0.0106006	169.832	0
4981271	1498.2	0.6	-0.1	-0.0106006	170.802	0
4981271	1498.2	0.6	-0.1	-0.0106006	171.781	0
4981271	1498.2	0.6	-0.1	-0.0106006	172.75	0
4981271	1498.2	0.6	-0.1	-0.0106006	173.832	0
4981271	1498.2	0.6	-0.1	-0.0106006	174.802	0
4981271	1498.2	0.6	-0.1	-0.0106006	175.773	0
4981271	1498.2	0.6	-0.1	-0.0106006	176.75	0
4981271	1498.2	0.6	-0.1	-0.0106006	177.832	0
4981271	1498.2	0.6	-0.1	-0.0106006	178.802	0
4981271	1498.2	0.6	-0.1	-0.0106006	179.773	0
4981271	1498.2	0.6	-0.1	-0.0106006	180.861	0
4981271	1498.2	0.6	-0.1	-0.0106006	181.837	0
4.98127e+06	1498.2	0.7	-0.1	-0.0123674	182.809	0
4.98127e+06	1498.2	0.9	-0.1	-0.0159009	183.781	0
4.98127e+06	1498.3	1.1	0	-0.0194344	184.753	0
4.98127e+06	1498.3	0.7	0	-0.0123674	185.84	0
4981271	1498.2	0.6	-0.1	-0.0106006	186.812	0
4981271	1498.2	0.6	-0.1	-0.0106006	187.783	0
4981271	1498.2	0.6	-0.1	-0.0106006	188.758	0
4981271	1498.2	0.6	-0.1	-0.0106006	189.843	0
4981271	1498.2	0.6	-0.1	-0.0106006	190.814	0
4.98127e+06	1498.2	0.7	-0.1	-0.0123674	191.787	0
4981271	1498.2	0.6	-0.1	-0.0106006	192.761	0
4.98127e+06	1498.2	0.7	-0.1	-0.0123674	193.847	0
4.98127e+06	1498.2	0.7	-0.1	-0.0123674	194.82	0
4981271	1498.2	0.6	-0.1	-0.0106006	195.791	0
4.98127e+06	1498.2	0.7	-0.1	-0.0123674	196.875	0
4981271	1498.2	0.6	-0.1	-0.0106006	197.843	0
4.98127e+06	1498.2	0.7	-0.1	-0.0123674	198.814	0
4.98127e+06	1498.2	0.7	-0.1	-0.0123674	199.787	0
4.98127e+06	1498.2	0.7	-0.1	-0.0123674	200.873	0
4.98127e+06	1498.2	0.7	-0.1	-0.0123674	201.851	0
4.98127e+06	1498.2	0.7	-0.1	-0.0123674	202.822	0
4.98127e+06	1498.2	0.7	-0.1	-0.0123674	203.791	0
4.98127e+06	1498.2	0.7	-0.1	-0.0123674	204.875	0
4.98127e+06	1498.2	0.7	-0.1	-0.0123674	205.843	0
4.98127e+06	1498.2	0.7	-0.1	-0.0123674	206.814	0
4.98127e+06	1498.2	0.7	-0.1	-0.0123674	207.787	0
4.98127e+06	1498.2	0.7	-0.1	-0.0123674	208.873	0
4.98127e+06	1498.2	0.8	-0.1	-0.0141341	209.843	0
4.98127e+06	1498.2	0.7	-0.1	-0.0123674	210.814	0
4.98127e+06	1498.2	0.7	-0.1	-0.0123674	211.787	0
4.98127e+06	1498.2	0.7	-0.1	-0.0123674	212.873	0
4.98127e+06	1498.2	0.8	-0.1	-0.0141341	213.843	0
4.98127e+06	1498.2	0.7	-0.1	-0.0123674	214.814	0
4.98127e+06	1498.2	0.7	-0.1	-0.0123674	215.787	0
4.98127e+06	1498.2	0.8	-0.1	-0.0141341	216.873	0
4.98127e+06	1498.2	0.7	-0.1	-0.0123674	217.843	0
4.98127e+06	1498.2	0.7	-0.1	-0.0123674	218.814	0
4.98127e+06	1498.2	0.8	-0.1	-0.0141341	219.791	0
4.98127e+06	1498.2	0.8	-0.1	-0.0141341	220.875	0
4.98127e+06	1498.2	0.7	-0.1	-0.0123674	221.853	0
4.98127e+06	1498.2	0.8	-0.1	-0.0141341	222.824	0
4.98127e+06	1498.2	0.7	-0.1	-0.0123674	223.795	0
4.98127e+06	1498.2	0.8	-0.1	-0.0141341	224.881	0
4.98127e+06	1498.2	0.8	-0.1	-0.0141341	225.853	0
4.98127e+06	1498.2	0.9	-0.1	-0.0159009	226.824	0
4.98127e+06	1498.2	0.9	-0.1	-0.0159009	227.799	0
4.98127e+06	1498.2	0.8	-0.1	-0.0141341	228.884	0
4.98127e+06	1498.2	0.8	-0.1	-0.0141341	229.855	0
4.98127e+06	1498.2	0.8	-0.1	-0.0141341	230.828	0
4.98127e+06	1498.2	0.8	-0.1	-0.0141341	231.8	0
4.98127e+06	1498.2	0.9	-0.1	-0.0159009	232.884	0
4.98127e+06	1498.2	0.9	-0.1	-0.0159009	233.855	0
4.98127e+06	1498.3	0.9	0	-0.0159009	234.828	0
4.98127e+06	1498.2	0.8	-0.1	-0.0141341	235.804	0
4.98127e+06	1498.2	0.9	-0.1	-0.0159009	236.892	0
4.98127e+06	1498.5	-0.1	0.2	0.00176677	237.865	0
4.98127e+06	1498.5	-5.3	0.2	0.0936386	238.842	0
4.98124e+06	1499.1	-31.3	0.8	0.552998	239.814	0
4.98115e+06	1498.9	-124.6	0.6	2.20139	240.904	0
4.98109e+06	1498.1	-182.8	-0.2	3.22965	241.885	0
4.98107e+06	1499.7	-201.5	1.4	3.56003	242.861	0
4.98106e+06	1500.2	-210.9	1.9	3.72611	243.836	0
4.98106e+06	1500.7	-214.8	2.4	3.79501	244.813	0
4.98105e+06	1500.9	-216.1	2.6	3.81798	245.902	0
4.98106e+06	1501.1	-215.2	2.8	3.80208	246.873	0
4.98106e+06	1501.3	-212.8	3	3.75968	247.844	0
4.98106e+06	1501.5	-209.7	3.2	3.70491	248.815	0
4.98106e+06	1501.7	-205.8	3.4	3.636	249.903	0
4.98107e+06	1501.8	-201.5	3.5	3.56003	250.875	0
4.98107e+06	1501.9	-196.9	3.6	3.47876	251.843	0
4.98108e+06	1501.9	-192.3	3.6	3.39749	252.814	0
4981083	1502	-187.4	3.7	3.31092	253.902	0
4.98109e+06	1502	-182.7	3.7	3.22788	254.873	0
4.98109e+06	1502.1	-177.9	3.8	3.14308	255.843	0
4981097	1502.1	-173.4	3.8	3.06357	256.928	0
4.9811e+06	1502.1	-169	3.8	2.98583	257.901	0
4.98111e+06	1502.1	-164.5	3.8	2.90633	258.874	0
4.98111e+06	1502.1	-160.2	3.8	2.83036	259.844	0
4.98111e+06	1502.1	-156	3.8	2.75616	260.928	0
4.98112e+06	1502.1	-152	3.8	2.68548	261.907	0
4.98112e+06	1502.1	-148.1	3.8	2.61658	262.878	0
4981126	1502.2	-144.4	3.9	2.55121	263.848	0
4.98113e+06	1502.2	-140.8	3.9	2.48761	264.936	0
4.98113e+06	1502.2	-137.3	3.9	2.42577	265.907	0
4.98114e+06	1502.3	-134	4	2.36747	266.878	0
4.98114e+06	1502.3	-130.8	4	2.31093	267.875	0
4.98114e+06	1502.2	-127.8	3.9	2.25793	268.844	0
4.98115e+06	1502.3	-124.8	4	2.20492	269.855	0
4.98115e+06	1502.3	-122.2	4	2.15899	270.94	0
4.98115e+06	1502.3	-119.7	4	2.11482	271.912	0
4.98115e+06	1502.3	-117.3	4	2.07242	272.883	0
4.98116e+06	1502.3	-114.8	4	2.02825	273.854	0
4.98116e+06	1502.4	-112.5	4.1	1.98761	274.938	0
4.98116e+06	1502.4	-110.2	4.1	1.94698	275.906	0
4.98116e+06	1502.5	-107.9	4.2	1.90634	276.874	0
4.98116e+06	1502.5	-105.8	4.2	1.86924	277.843	0
4.98117e+06	1502.5	-103.6	4.2	1.83037	278.925	0
4.98117e+06	1502.5	-101.8	4.2	1.79857	279.896	0
4.98117e+06	1502.5	-99.8	4.2	1.76323	280.864	0
4.98117e+06	1502.6	-98	4.3	1.73143	281.947	0
4.98117e+06	1502.6	-96.3	4.3	1.7014	282.917	0
4.98118e+06	1502.6	-94.6	4.3	1.67136	283.885	0
4.98118e+06	1502.6	-93.1	4.3	1.64486	284.856	0
4.98118e+06	1502.7	-91.5	4.4	1.61659	285.944	0
4.98118e+06	1502.7	-90	4.4	1.59009	286.915	0
4981182	1502.7	-88.4	4.4	1.56182	287.885	0
4.98118e+06	1502.7	-86.9	4.4	1.53532	288.856	0
4.98118e+06	1502.8	-85.5	4.5	1.51059	289.944	0
4.98119e+06	1502.8	-84.1	4.5	1.48585	290.915	0
4.98119e+06	1502.8	-82.8	4.5	1.46288	291.885	0
4.98119e+06	1502.8	-81.5	4.5	1.43991	292.856	0
4.98119e+06	1502.8	-80.3	4.5	1.41871	293.944	0
4.98119e+06	1502.8	-79.2	4.5	1.39928	294.915	0
4.98119e+06	1502.8	-78.1	4.5	1.37984	295.885	0
4.98119e+06	1502.8	-77.1	4.5	1.36218	296.86	0
4.98119e+06	1502.8	-76	4.5	1.34274	297.946	0
4.9812e+06	1502.8	-75.1	4.5	1.32684	298.917	0
4.9812e+06	1502.8	-74.1	4.5	1.30917	299.885	0
4981197	1502.8	-73.4	4.5	1.29681	300.858	0
4.9812e+06	1502.9	-72.5	4.6	1.2809	301.948	0
4.9812e+06	1502.9	-71.8	4.6	1.26854	302.917	0
4.9812e+06	1502.9	-71.1	4.6	1.25617	303.885	0
4981200	1502.9	-70.4	4.6	1.2438	304.969	0
4.9812e+06	1502.9	-69.9	4.6	1.23497	305.94	0
4.9812e+06	1502.9	-69.3	4.6	1.22437	306.913	0
4.9812e+06	1502.9	-68.7	4.6	1.21377	307.885	0
4.9812e+06	1502.9	-68.1	4.6	1.20317	308.969	0
4.9812e+06	1503	-67.6	4.7	1.19433	309.94	0
4.9812e+06	1503	-67.1	4.7	1.1855	310.913	0
4.9812e+06	1503	-66.6	4.7	1.17667	311.885	0
4.9812e+06	1503	-66.1	4.7	1.16783	312.969	0
4.9812e+06	1503	-65.7	4.7	1.16077	313.94	0
4.98121e+06	1503	-65.2	4.7	1.15193	314.913	0
4.98121e+06	1503	-64.8	4.7	1.14486	315.885	0
4981206	1503	-64.4	4.7	1.1378	316.969	0
4.98121e+06	1503	-64	4.7	1.13073	317.94	0
4.98121e+06	1503	-63.6	4.7	1.12366	318.913	0
4.98121e+06	1503	-63.2	4.7	1.1166	319.885	0
4.98121e+06	1503	-62.8	4.7	1.10953	320.969	0
4.98121e+06	1503	-62.5	4.7	1.10423	321.947	0
4.98121e+06	1503	-62.1	4.7	1.09716	322.916	0
4.98121e+06	1503	-61.7	4.7	1.0901	323.886	0
4981209	1503	-61.4	4.7	1.08479	324.972	0
4.98121e+06	1503	-61.1	4.7	1.07949	325.945	0
4.98121e+06	1503	-60.7	4.7	1.07243	326.916	0
4.98121e+06	1503	-60.5	4.7	1.06889	327.886	0
4.98121e+06	1503	-60.3	4.7	1.06536	328.972	0
4.98121e+06	1502.9	-60	4.6	1.06006	329.945	0
4.98121e+06	1502.9	-59.6	4.6	1.05299	330.916	0
4.98121e+06	1503	-59.5	4.7	1.05123	331.89	0
4.98121e+06	1503	-59.3	4.7	1.04769	332.978	0
4.98121e+06	1503	-59	4.7	1.04239	333.949	0
4.98121e+06	1503	-58.8	4.7	1.03886	334.92	0
4.98121e+06	1503	-58.5	4.7	1.03356	335.892	0
4.98121e+06	1503	-58.3	4.7	1.03002	336.98	0
4.98121e+06	1503	-58.1	4.7	1.02649	337.953	0
4.98121e+06	1503	-57.8	4.7	1.02119	338.925	0
4.98121e+06	1503	-57.7	4.7	1.01942	339.896	0
4.98121e+06	1502.9	-57.5	4.6	1.01589	340.984	0
4.98121e+06	1502.9	-57.2	4.6	1.01059	341.961	0
4.98121e+06	1502.9	-57.1	4.6	1.00882	342.931	0
4.98121e+06	1502.9	-56.8	4.6	1.00352	343.904	0
4.98121e+06	1502.9	-56.7	4.6	1.00176	344.99	0
4.98121e+06	1502.9	-56.5	4.6	0.998223	345.961	0
4981214	1502.9	-56.4	4.6	0.996456	346.931	0
4.98121e+06	1502.9	-56.1	4.6	0.991156	347.904	0
4.98121e+06	1502.9	-56	4.6	0.989389	348.99	0
4.98121e+06	1502.9	-55.9	4.6	0.987622	349.961	0
4.98121e+06	1502.9	-55.6	4.6	0.982322	350.931	0
4.98121e+06	1502.9	-55.5	4.6	0.980555	351.908	0
4981215	1502.9	-55.4	4.6	0.978788	352.994	0
4.98122e+06	1502.9	-55.3	4.6	0.977022	353.966	0
4.98122e+06	1502.9	-55	4.6	0.971721	354.939	0
4.98122e+06	1502.9	-55	4.6	0.971721	355.912	0
4.98122e+06	1502.9	-54.8	4.6	0.968188	356.998	0
4.98122e+06	1502.9	-54.6	4.6	0.964654	357.968	0
4.98122e+06	1502.9	-54.5	4.6	0.962888	358.939	0
4981216	1502.9	-54.4	4.6	0.961121	359.914	0
4.98122e+06	1502.9	-54.3	4.6	0.959354	360.998	0
4.98122e+06	1502.9	-54.1	4.6	0.95582	361.968	0
4.98122e+06	1502.9	-54.1	4.6	0.95582	362.939	0
4.98122e+06	1502.9	-54	4.6	0.954054	363.912	0
4.98122e+06	1502.9	-53.8	4.6	0.95052	364.998	0
4.98122e+06	1502.9	-53.7	4.6	0.948753	365.968	0
4.98122e+06	1502.9	-53.6	4.6	0.946987	366.939	0
4.98122e+06	1502.9	-53.5	4.6	0.94522	368.027	0
4981217	1502.9	-53.4	4.6	0.943453	368.998	0
4.98122e+06	1502.9	-53.3	4.6	0.941686	369.968	0
4.98122e+06	1502.9	-53.1	4.6	0.938153	370.939	0
4.98122e+06	1502.9	-53.1	4.6	0.938153	372.027	0
4.98122e+06	1502.9	-53	4.6	0.936386	372.998	0
4.98122e+06	1502.8	-53	4.5	0.936386	373.968	0
4.98122e+06	1502.9	-52.9	4.6	0.934619	374.939	0
4.98122e+06	1502.9	-52.8	4.6	0.932852	376.027	0
4.98122e+06	1502.9	-52.6	4.6	0.929319	377.006	0
4.98122e+06	1502.9	-52.6	4.6	0.929319	377.978	0
4.98122e+06	1502.9	-52.5	4.6	0.927552	378.949	0
4981218	1502.9	-52.4	4.6	0.925785	380.033	0
4981218	1502.9	-52.4	4.6	0.925785	381.018	0
4.98122e+06	1502.8	-52.3	4.5	0.924019	381.994	0
4.98122e+06	1502.8	-52.2	4.5	0.922252	382.966	0
4.98122e+06	1502.8	-52.1	4.5	0.920485	383.935	0
4.98122e+06	1502.8	-52.1	4.5	0.920485	385.022	0
4.98122e+06	1502.8	-52	4.5	0.918718	385.994	0
4.98122e+06	1502.8	-51.9	4.5	0.916952	386.966	0
4.98122e+06	1502.8	-51.8	4.5	0.915185	387.939	0
4.98122e+06	1502.8	-51.8	4.5	0.915185	389.026	0
4.98122e+06	1502.8	-51.6	4.5	0.911651	389.998	0
4.98122e+06	1502.8	-51.7	4.5	0.913418	390.967	0
4.98122e+06	1502.8	-51.5	4.5	0.909884	391.937	0
4.98122e+06	1502.8	-51.5	4.5	0.909884	393.022	0
4981219	1502.8	-51.4	4.5	0.908118	393.994	0
4981219	1502.8	-51.4	4.5	0.908118	394.966	0
4981219	1502.8	-51.4	4.5	0.908118	396.051	0
4.98122e+06	1502.8	-51.3	4.5	0.906351	397.022	0
4.98122e+06	1502.8	-51.3	4.5	0.906351	397.995	0
4.98122e+06	1502.8	-51.2	4.5	0.904584	398.967	0
4.98122e+06	1502.8	-51.1	4.5	0.902818	400.053	0
4.98122e+06	1502.8	-51.1	4.5	0.902818	401.032	0
4.98122e+06	1502.8	-51	4.5	0.901051	402.003	0
4.98122e+06	1502.8	-51	4.5	0.901051	402.973	0
4.98122e+06	1502.8	-51	4.5	0.901051	404.061	0
4.98122e+06	1502.8	-51	4.5	0.901051	405.032	0
4.98122e+06	1502.8	-50.8	4.5	0.897517	406.003	0
4.98122e+06	1502.8	-50.7	4.5	0.89575	406.973	0
4.98122e+06	1502.8	-50.7	4.5	0.89575	408.061	0
4.98122e+06	1502.7	-50.7	4.4	0.89575	409.032	0
4.98122e+06	1502.8	-50.6	4.5	0.893984	410.003	0
4.98122e+06	1502.7	-50.6	4.4	0.893984	410.973	0
4.98122e+06	1502.8	-50.5	4.5	0.892217	412.061	0
4.98122e+06	1502.7	-50.5	4.4	0.892217	413.032	0
4.98122e+06	1502.7	-50.5	4.4	0.892217	414.003	0
4981220	1502.7	-50.4	4.4	0.89045	414.973	0
4981220	1502.7	-50.4	4.4	0.89045	416.061	0
4981220	1502.7	-50.4	4.4	0.89045	417.032	0
4.98122e+06	1502.7	-50.3	4.4	0.888683	418.003	0
4.98122e+06	1502.7	-50.3	4.4	0.888683	418.973	0
4.98122e+06	1502.7	-50.2	4.4	0.886917	420.061	0
4.98122e+06	1502.7	-50.1	4.4	0.88515	421.032	0
4.98122e+06	1502.5	-50	4.2	0.883383	422.003	0
4.98122e+06	1502.6	-50	4.3	0.883383	422.973	0
4.98122e+06	1502.5	-50	4.2	0.883383	424.061	0
4.98122e+06	1502.5	-50	4.2	0.883383	425.032	0
4.98122e+06	1502.5	-50	4.2	0.883383	426.01	0
4.98122e+06	1502.5	-49.8	4.2	0.879849	426.981	0
4.98122e+06	1502.5	-49.8	4.2	0.879849	428.069	0
4.98122e+06	1502.5	-49.8	4.2	0.879849	429.04	0
4.98122e+06	1502.5	-49.8	4.2	0.879849	430.01	0
4.98122e+06	1502.5	-49.7	4.2	0.878083	430.981	0
4.98122e+06	1502.5	-49.7	4.2	0.878083	432.069	0
4.98122e+06	1502.5	-49.6	4.2	0.876316	433.04	0
4.98122e+06	1502.5	-49.6	4.2	0.876316	434.01	0
4.98122e+06	1502.5	-49.6	4.2	0.876316	434.983	0
4.98122e+06	1502.5	-49.6	4.2	0.876316	436.071	0
4.98122e+06	1502.5	-49.5	4.2	0.874549	437.042	0
4.98122e+06	1502.5	-49.5	4.2	0.874549	438.01	0
4.98122e+06	1502.5	-49.5	4.2	0.874549	438.981	0
4.98122e+06	1502.5	-49.5	4.2	0.874549	440.069	0
4981221	1502.6	-49.4	4.3	0.872783	441.04	0
4981221	1502.6	-49.4	4.3	0.872783	442.01	0
4.98122e+06	1502.6	-49.3	4.3	0.871016	443.094	0
4.98122e+06	1502.6	-49.3	4.3	0.871016	444.065	0
4.98122e+06	1502.6	-49.3	4.3	0.871016	445.038	0
4.98122e+06	1502.6	-49.2	4.3	0.869249	446.01	0
4.98122e+06	1502.6	-49.2	4.3	0.869249	447.094	0
4.98122e+06	1502.6	-49.1	4.3	0.867482	448.065	0
4.98122e+06	1502.5	-49.1	4.2	0.867482	449.038	0
4.98122e+06	1502.6	-49.1	4.3	0.867482	450.01	0
4.98122e+06	1502.5	-49	4.2	0.865715	451.104	0
4.98122e+06	1502.5	-48.9	4.2	0.863949	452.075	0
4.98122e+06	1502.5	-48.8	4.2	0.862182	453.048	0
4.98122e+06	1502.5	-48.9	4.2	0.863949	454.02	0
4.98122e+06	1502.5	-48.8	4.2	0.862182	455.106	0
4.98122e+06	1502.5	-48.8	4.2	0.862182	456.079	0
4.98122e+06	1502.5	-48.8	4.2	0.862182	457.051	0
4.98122e+06	1502.5	-48.8	4.2	0.862182	458.022	0
4.98122e+06	1502.5	-48.7	4.2	0.860415	459.11	0
4.98122e+06	1502.5	-48.7	4.2	0.860415	460.081	0
4.98122e+06	1502.5	-48.6	4.2	0.858648	461.051	0
4.98122e+06	1502.5	-48.6	4.2	0.858648	462.022	0
4.98122e+06	1502.4	-48.6	4.1	0.858648	463.11	0
4.98122e+06	1502.4	-48.6	4.1	0.858648	464.081	0
4.98122e+06	1502.5	-49	4.2	0.865715	465.051	0
4.98122e+06	1502.5	-48.8	4.2	0.862182	466.022	0
4.98122e+06	1502.5	-48.6	4.2	0.858648	467.11	0
4.98122e+06	1502.5	-48.6	4.2	0.858648	468.081	0
4.98122e+06	1502.4	-48.6	4.1	0.858648	469.051	0
4981222	1502.4	-48.4	4.1	0.855115	470.022	0
4.98122e+06	1502.4	-48.2	4.1	0.851581	471.11	0
4.98122e+06	1502.4	-47.9	4.1	0.846281	472.081	0
4.98122e+06	1502.4	-47.6	4.1	0.840981	473.051	0
4.98122e+06	1502.4	-47.3	4.1	0.83568	474.022	0
4.98122e+06	1502.4	-47	4.1	0.83038	475.11	0
4.98122e+06	1502.4	-46.5	4.1	0.821546	476.081	0
4.98122e+06	1502.3	-46.1	4	0.814479	477.051	0
4.98122e+06	1502.4	-45.6	4.1	0.805645	478.022	0
4.98123e+06	1502.3	-45.1	4	0.796812	479.11	0
4.98123e+06	1502.3	-44.6	4	0.787978	480.081	0
4.98123e+06	1502.4	-44.3	4.1	0.782677	481.051	0
4.98123e+06	1502.5	-43.8	4.2	0.773844	482.026	0
4.98123e+06	1503	-44	4.7	0.777377	483.114	0
4.98123e+06	1503.7	-44	5.4	0.777377	484.083	0
4.98123e+06	1504.5	-44.5	6.2	0.786211	485.052	0
4.98123e+06	1505.6	-45.2	7.3	0.798578	486.028	0
4.98122e+06	1510.6	-49.6	12.3	0.876316	487.115	0
4.98122e+06	1510.6	-48.9	12.3	0.863949	488.087	0
4.98122e+06	1510.1	-46.3	11.8	0.818013	489.059	0
4.98123e+06	1507.9	-45.3	9.6	0.800345	490.032	0
4.98123e+06	1507.3	-44.2	9	0.780911	491.116	0
4.98123e+06	1506.5	-43.1	8.2	0.761476	492.087	0
4.98123e+06	1506	-42.7	7.7	0.754409	493.059	0
4.98122e+06	1506.3	-46.7	8	0.82508	494.036	0
4.98122e+06	1517.1	-55.1	18.8	0.973488	495.122	0
4.98122e+06	1516.4	-48.7	18.1	0.860415	496.093	0
4.98123e+06	1510.1	-44.5	11.8	0.786211	497.063	0
4.98123e+06	1508.5	-43.5	10.2	0.768543	498.04	0
4.98123e+06	1508.7	-43.3	10.4	0.76501	499.124	0
4.98123e+06	1509.2	-43.6	10.9	0.77031	500.094	0
4.98122e+06	1513.9	-48.1	15.6	0.849815	501.073	0
4.98122e+06	1513.9	-47.3	15.6	0.83568	502.042	0
4.98123e+06	1513.6	-43.7	15.3	0.772077	503.124	0
4.98123e+06	1510.1	-44.3	11.8	0.782677	504.094	0
4.98122e+06	1512.8	-50.3	14.5	0.888683	505.065	0
4.98122e+06	1516.5	-45.9	18.2	0.810946	506.153	0
4981225	1512.4	-45.4	14.1	0.802112	507.124	0
4981219	1516	-51.4	17.7	0.908118	508.094	0
4981219	1519.6	-51.4	21.3	0.908118	509.065	0
4.98122e+06	1519.6	-51.1	21.3	0.902818	510.154	0
4.98122e+06	1519.1	-50.5	20.8	0.892217	511.125	0
4.98122e+06	1519.7	-50.6	21.4	0.893984	512.093	0
4.98122e+06	1516.3	-46.3	18	0.818013	513.064	0
4.98122e+06	1516.6	-48.6	18.3	0.858648	514.152	0
4.98122e+06	1520.1	-50.7	21.8	0.89575	515.123	0
4.98122e+06	1519.8	-50.3	21.5	0.888683	516.094	0
4.98122e+06	1519.8	-50.6	21.5	0.893984	517.065	0
4.98122e+06	1520.2	-50.3	21.9	0.888683	518.153	0
4.98122e+06	1520	-50.1	21.7	0.88515	519.124	0
4.98122e+06	1520	-49.8	21.7	0.879849	520.094	0
4.98122e+06	1519.6	-49.2	21.3	0.869249	521.065	0
4.98122e+06	1518.9	-48.8	20.6	0.862182	522.153	0
4.98122e+06	1519.4	-49.2	21.1	0.869249	523.124	0
4.98122e+06	1519.3	-48.8	21	0.862182	524.094	0
4.98122e+06	1518.6	-47.7	20.3	0.842747	525.065	0
4.98122e+06	1517.3	-46.5	19	0.821546	526.153	0
4.98122e+06	1516.7	-46.3	18.4	0.818013	527.124	0
4.98122e+06	1517.3	-46.8	19	0.826847	528.094	0
4.98122e+06	1517.6	-47	19.3	0.83038	529.067	0
4981223	1518.2	-47.4	19.9	0.837447	530.155	0
4.98122e+06	1518	-47.3	19.7	0.83568	531.124	0
4.98122e+06	1518	-47	19.7	0.83038	532.094	0
4.98122e+06	1517.9	-46.6	19.6	0.823313	533.07	0
4.98122e+06	1517.6	-46.3	19.3	0.818013	534.156	0
4.98122e+06	1517.3	-46.1	19	0.814479	535.125	0
4.98122e+06	1517.3	-46.2	19	0.816246	536.093	0
4.98122e+06	1517.3	-46	19	0.812712	537.177	0
4.98122e+06	1517.1	-45.7	18.8	0.807412	538.148	0
4981224	1517	-46.4	18.7	0.819779	539.121	0
4.98122e+06	1520.1	-49.3	21.8	0.871016	540.093	0
4981221	1521	-49.4	22.7	0.872783	541.177	0
4.98122e+06	1522	-50.2	23.7	0.886917	542.148	0
4.98122e+06	1522.3	-50.2	24	0.886917	543.122	0
4.98122e+06	1522.5	-50.3	24.2	0.888683	544.092	0
4.98122e+06	1522.6	-50.3	24.3	0.888683	545.176	0
4.98122e+06	1522.7	-50.2	24.4	0.886917	546.148	0
4.98122e+06	1522.7	-50.3	24.4	0.888683	547.121	0
4.98122e+06	1522.9	-46.9	24.6	0.828613	548.093	0
4.98123e+06	1518.7	-45.3	20.4	0.800345	549.177	0
4.98122e+06	1519.2	-49.9	20.9	0.881616	550.148	0
4.98122e+06	1523.3	-50.5	25	0.892217	551.125	0
4.98122e+06	1523.8	-50.5	25.5	0.892217	552.094	0
4.98122e+06	1524	-50.6	25.7	0.893984	553.184	0
4.98122e+06	1524.3	-50.6	26	0.893984	554.157	0
4.98122e+06	1524.5	-50.6	26.2	0.893984	555.125	0
4.98122e+06	1524.8	-50.8	26.5	0.897517	556.094	0
4.98122e+06	1525.2	-50.9	26.9	0.899284	557.177	0
4.98122e+06	1525.4	-51	27.1	0.901051	558.147	0
4.98122e+06	1526.2	-51.5	27.9	0.909884	559.119	0
4981219	1526.2	-51.4	27.9	0.908118	560.094	0
4.98122e+06	1525.2	-50.3	26.9	0.888683	561.177	0
4.98122e+06	1525.2	-49.6	26.9	0.876316	562.147	0
4.98122e+06	1525.2	-50.8	26.9	0.897517	563.119	0
4.98122e+06	1526.4	-50.6	28.1	0.893984	564.092	0
4.98122e+06	1526.5	-50.7	28.2	0.89575	565.175	0
4.98122e+06	1526.7	-50.3	28.4	0.888683	566.146	0
4.98122e+06	1525.9	-49.7	27.6	0.878083	567.119	0
4.98122e+06	1526.6	-50	28.3	0.883383	568.205	0
4.98122e+06	1526.6	-49.8	28.3	0.879849	569.175	0
4981221	1526.6	-49.4	28.3	0.872783	570.146	0
4.98122e+06	1526.1	-48.5	27.8	0.856882	571.119	0
4.98122e+06	1524.7	-46.7	26.4	0.82508	572.205	0
4.98123e+06	1522.3	-44.2	24	0.780911	573.175	0
4.98123e+06	1522.4	-44.6	24.1	0.787978	574.146	0
4.98123e+06	1522.4	-44.5	24.1	0.786211	575.119	0
4.98123e+06	1522.9	-45	24.6	0.795045	576.204	0
4.98123e+06	1523.6	-44.6	25.3	0.787978	577.176	0
4.98123e+06	1523.4	-44.2	25.1	0.780911	578.147	0
4.98123e+06	1523.3	-43.8	25	0.773844	579.12	0
4981227	1523.2	-43.4	24.9	0.766776	580.206	0
4.98123e+06	1522.9	-42.8	24.6	0.756176	581.176	0
4.98123e+06	1522.6	-42.2	24.3	0.745575	582.147	0
4981229	1522.2	-41.4	23.9	0.731441	583.12	0
4.98123e+06	1521.8	-40.8	23.5	0.720841	584.206	0
4.98123e+06	1521.3	-39.8	23	0.703173	585.176	0
4.98123e+06	1520.9	-39.6	22.6	0.699639	586.147	0
4981231	1521.2	-39.4	22.9	0.696106	587.12	0
4.98123e+06	1520.9	-38.8	22.6	0.685505	588.206	0
4.98123e+06	1520.8	-38.3	22.5	0.676671	589.176	0
4.98123e+06	1520.8	-37.9	22.5	0.669604	590.147	0
4.98123e+06	1520.7	-37.5	22.4	0.662537	591.122	0
4.98123e+06	1520.6	-37.1	22.3	0.65547	592.206	0
4.98123e+06	1520.5	-36.5	22.2	0.64487	593.176	0
4.98123e+06	1520.2	-35.5	21.9	0.627202	594.147	0
4981236	1519.4	-34.4	21.1	0.607768	595.12	0
4.98124e+06	1518.7	-33.6	20.4	0.593633	596.206	0
4.98124e+06	1518.3	-33.2	20	0.586566	597.176	0
4.98124e+06	1518.2	-32.7	19.9	0.577732	598.147	0
4.98124e+06	1518.1	-32.3	19.8	0.570665	599.235	0
4.98124e+06	1518.1	-31.8	19.8	0.561832	600.206	0
4.98124e+06	1519	-33.5	20.7	0.591867	601.185	0
4.98123e+06	1523.3	-36.1	25	0.637803	602.157	0
4.98123e+06	1523.4	-35.9	25.1	0.634269	603.128	0
4.98123e+06	1523.6	-35.6	25.3	0.628969	604.212	0
4981235	1523.6	-35.4	25.3	0.625435	605.181	0
4.98124e+06	1523.7	-35.1	25.4	0.620135	606.154	0
4.98124e+06	1523.8	-34.9	25.5	0.616601	607.24	0
4.98124e+06	1524	-34.6	25.7	0.611301	608.211	0
4981236	1524.1	-34.4	25.8	0.607768	609.181	0
4.98124e+06	1524.3	-34.2	26	0.604234	610.153	0
4.98124e+06	1524.6	-34.1	26.3	0.602467	611.239	0
4.98124e+06	1525	-34.2	26.7	0.604234	612.208	0
4981236	1525.7	-34.4	27.4	0.607768	613.178	0
4.98124e+06	1526.4	-35	28.1	0.618368	614.151	0
4.98123e+06	1527.7	-35.5	29.4	0.627202	615.238	0
4.98123e+06	1528.4	-35.8	30.1	0.632502	616.207	0
4.98123e+06	1529.1	-36	30.8	0.636036	617.177	0
4.98123e+06	1529.9	-36.3	31.6	0.641336	618.147	0
4.98123e+06	1530.7	-36.5	32.4	0.64487	619.235	0
4.98123e+06	1530.7	-36.5	32.4	0.64487	620.207	0
4.98123e+06	1531.2	-36.5	32.9	0.64487	621.176	0
4.98123e+06	1531.5	-36.5	33.2	0.64487	622.149	0
4.98123e+06	1532.1	-36.7	33.8	0.648403	623.237	0
4.98123e+06	1532.7	-36.6	34.4	0.646636	624.208	0
4.98123e+06	1533.4	-36.6	35.1	0.646636	625.178	0
4.98123e+06	1533.9	-36.5	35.6	0.64487	626.152	0
4.98123e+06	1534.2	-35.8	35.9	0.632502	627.238	0
4.98124e+06	1533.5	-34.7	35.2	0.613068	628.207	0
4.98124e+06	1533.4	-34.3	35.1	0.606001	629.176	0
4.98124e+06	1533.8	-33.9	35.5	0.598934	630.26	0
4.98124e+06	1534.4	-33.8	36.1	0.597167	631.231	0
4981236	1535.2	-34.4	36.9	0.607768	632.204	0
4.98123e+06	1538.5	-37	40.2	0.653703	633.175	0
4.98123e+06	1540.5	-38.1	42.2	0.673138	634.259	0
4.98122e+06	1540.5	-54.7	42.2	0.966421	635.231	0
4.98122e+06	1560.3	-52.8	62	0.932852	636.204	0
4.98122e+06	1557.7	-50.8	59.4	0.897517	637.176	0
4.98122e+06	1556.2	-49	57.9	0.865715	638.26	0
4.98122e+06	1555.2	-48	56.9	0.848048	639.231	0
4981223	1555.3	-47.4	57	0.837447	640.204	0
4.98122e+06	1555.8	-47.1	57.5	0.832147	641.176	0
4.98122e+06	1556.9	-48.3	58.6	0.853348	642.261	0
4.98122e+06	1559.3	-48.3	61	0.853348	643.234	0
4.98123e+06	1555.4	-41.8	57.1	0.738508	644.206	0
4.98123e+06	1550.6	-38.3	52.3	0.676671	645.176	0
4.98123e+06	1550.1	-37.3	51.8	0.659004	646.259	0
4981235	1548.7	-35.4	50.4	0.625435	647.229	0
4.98124e+06	1548.9	-34.8	50.6	0.614835	648.2	0
4.98124e+06	1548.9	-34.1	50.6	0.602467	649.174	0
4.98124e+06	1548.9	-33.5	50.6	0.591867	650.26	0
4.98124e+06	1549.1	-33.1	50.8	0.5848	651.239	0
4.98124e+06	1549.5	-32.7	51.2	0.577732	652.208	0
4.98124e+06	1550	-32.5	51.7	0.574199	653.177	0
4981238	1550.6	-32.4	52.3	0.572432	654.264	0
4.98124e+06	1551.2	-32.2	52.9	0.568899	655.238	0
4.98124e+06	1551.8	-32.2	53.5	0.568899	656.207	0
4.98124e+06	1552.6	-31.5	54.3	0.556531	657.18	0
4.98125e+06	1548	-23.7	49.7	0.418724	658.268	0
4.98125e+06	1541.5	-18.9	43.2	0.333919	659.239	0
4.98125e+06	1538.5	-15.8	40.2	0.279149	660.208	0
4.98126e+06	1537.1	-14.3	38.8	0.252648	661.177	0
4.98126e+06	1537.4	-13.8	39.1	0.243814	662.264	0
4981257	1537.6	-13.4	39.3	0.236747	663.236	0
4.98126e+06	1537.6	-12.2	39.3	0.215546	664.208	0
4.98126e+06	1537.1	-11.3	38.8	0.199645	665.292	0
4.98126e+06	1536.8	-10.5	38.5	0.18551	666.261	0
4.98126e+06	1536.9	-10	38.6	0.176677	667.235	0
4.98126e+06	1537.1	-9.7	38.8	0.171376	668.207	0
4.98126e+06	1537.8	-11	39.5	0.194344	669.291	0
4.98126e+06	1541.1	-13.3	42.8	0.23498	670.26	0
4.98126e+06	1542.4	-12.7	44.1	0.224379	671.231	0
4.98126e+06	1542.7	-12.3	44.4	0.217312	672.205	0
4.98126e+06	1542.5	-11.1	44.2	0.196111	673.29	0
4.98126e+06	1541.9	-10	43.6	0.176677	674.261	0
4.98126e+06	1541.8	-9.2	43.5	0.162543	675.234	0
4.98126e+06	1541.8	-8.6	43.5	0.151942	676.207	0
4.98126e+06	1542.4	-8.5	44.1	0.150175	677.292	0
4.98126e+06	1544.5	-9.8	46.2	0.173143	678.26	0
4.98126e+06	1544.5	-10.1	46.2	0.178443	679.23	0
4.98126e+06	1545.4	-10	47.1	0.176677	680.203	0
4.98126e+06	1545.9	-10.1	47.6	0.178443	681.288	0
4.98126e+06	1546.7	-10.3	48.4	0.181977	682.259	0
4.98126e+06	1547.5	-14.8	49.2	0.261481	683.23	0
4.98125e+06	1557.1	-20.6	58.8	0.363954	684.204	0
4.98125e+06	1559.7	-20.1	61.4	0.35512	685.289	0
4.98125e+06	1560	-19.7	61.7	0.348053	686.26	0
4.98125e+06	1560.2	-19.1	61.9	0.337452	687.234	0
4.98125e+06	1559.9	-18.3	61.6	0.323318	688.208	0
4.98125e+06	1560	-17.8	61.7	0.314484	689.291	0
4.98125e+06	1560.1	-17.3	61.8	0.30565	690.26	0
4.98125e+06	1560	-16.8	61.7	0.296817	691.234	0
4.98125e+06	1560	-16.5	61.7	0.291516	692.206	0
4.98125e+06	1560.2	-16.3	61.9	0.287983	693.291	0
4.98125e+06	1560.2	-16	61.9	0.282683	694.26	0
4.98125e+06	1560.5	-15.6	62.2	0.275616	695.231	0
4.98126e+06	1560.7	-15.1	62.4	0.266782	696.318	0
4.98126e+06	1560.9	-14.8	62.6	0.261481	697.29	0
4981256	1561.2	-14.4	62.9	0.254414	698.261	0
4.98126e+06	1561.5	-14.1	63.2	0.249114	699.235	0
4.98126e+06	1561.3	-13.3	63	0.23498	700.322	0
4.98126e+06	1561.3	-13	63	0.22968	701.301	0
4.98126e+06	1561.5	-12.6	63.2	0.222612	702.273	0
4.98126e+06	1561.7	-12.5	63.4	0.220846	703.247	0
4.98126e+06	1562	-12.3	63.7	0.217312	704.222	0
4.98126e+06	1562.3	-12	64	0.212012	705.311	0
4.98126e+06	1562.6	-11.8	64.3	0.208478	706.283	0
4.98126e+06	1562.8	-11.5	64.5	0.203178	707.257	0
4.98126e+06	1562.8	-11.2	64.5	0.197878	708.23	0
4.98126e+06	1563	-10.5	64.7	0.18551	709.315	0
4.98126e+06	1562.7	-9.8	64.4	0.173143	710.289	0
4.98126e+06	1562.4	-9	64.1	0.159009	711.26	0
4.98126e+06	1562.1	-8.3	63.8	0.146642	712.234	0
4.98126e+06	1561.8	-7.6	63.5	0.134274	713.321	0
4.98126e+06	1561.6	-7	63.3	0.123674	714.291	0
4.98126e+06	1561.4	-6.5	63.1	0.11484	715.26	0
4.98126e+06	1561.3	-6	63	0.106006	716.234	0
4.98127e+06	1560.6	-4.2	62.3	0.0742042	717.321	0
4.98127e+06	1558.3	-2.1	60	0.0371021	718.291	0
4.98127e+06	1557.7	-1.3	59.4	0.022968	719.26	0
4.98127e+06	1557.6	-0.9	59.3	0.0159009	720.23	0
4.98127e+06	1557.7	-0.5	59.4	0.00883383	721.315	0
4.98127e+06	1557.7	-0.3	59.4	0.0053003	722.287	0
4.98127e+06	1557.8	0.1	59.5	-0.00176677	723.258	0
4.98127e+06	1557.9	0.5	59.6	-0.00883383	724.343	0
4.98127e+06	1558	0.9	59.7	-0.0159009	725.313	0
4.98127e+06	1557.9	1.3	59.6	-0.022968	726.283	0
4.98127e+06	1558	1.9	59.7	-0.0335686	727.253	0
4.98127e+06	1557.8	2.4	59.5	-0.0424024	728.336	0
4.98127e+06	1557.7	3	59.4	-0.053003	729.303	0
4.98128e+06	1556.7	5	58.4	-0.0883383	730.273	0
4.98128e+06	1555.5	5.7	57.2	-0.100706	731.245	0
4.98128e+06	1555.3	6.4	57	-0.113073	732.33	0
4981277	1555.3	6.6	57	-0.116607	733.301	0
4.98128e+06	1555.4	6.8	57.1	-0.12014	734.271	0
4.98128e+06	1556.2	6.3	57.9	-0.111306	735.249	0
4.98128e+06	1557.6	5.4	59.3	-0.0954054	736.332	0
4.98128e+06	1557.6	5.9	59.3	-0.104239	737.303	0
4.98128e+06	1557.4	7.8	59.1	-0.137808	738.277	0
4.98128e+06	1555.8	9.2	57.5	-0.162543	739.253	0
4.98128e+06	1554.8	9.9	56.5	-0.17491	740.34	0
4.98128e+06	1554.3	10.5	56	-0.18551	741.313	0
4.98128e+06	1554	11	55.7	-0.194344	742.287	0
4.98128e+06	1553.8	11.5	55.5	-0.203178	743.26	0
4.98128e+06	1553.5	12	55.2	-0.212012	744.347	0
4.98128e+06	1553.4	12.4	55.1	-0.219079	745.321	0
4.98128e+06	1552.4	13.9	54.1	-0.245581	746.291	0
4981285	1551.6	14.6	53.3	-0.257948	747.26	0
4.98129e+06	1551.6	14.7	53.3	-0.259715	748.347	0
4.98129e+06	1551.4	15.2	53.1	-0.268548	749.321	0
4.98129e+06	1551.4	15.4	53.1	-0.272082	750.291	0
4.98129e+06	1551.4	15.5	53.1	-0.273849	751.27	0
4.98129e+06	1551.5	15.5	53.2	-0.273849	752.359	0
4.98129e+06	1551.7	15.5	53.4	-0.273849	753.331	0
4.98129e+06	1551.9	15.5	53.6	-0.273849	754.302	0
4.98129e+06	1552.1	15.2	53.8	-0.268548	755.276	0
4.98129e+06	1552.7	14.9	54.4	-0.263248	756.363	0
4981285	1553.2	14.6	54.9	-0.257948	757.333	0
4.98128e+06	1553.6	14.5	55.3	-0.256181	758.302	0
4.98128e+06	1553.9	14.5	55.6	-0.256181	759.276	0
4981285	1554.1	14.6	55.8	-0.257948	760.363	0
4.98129e+06	1553.8	15	55.5	-0.265015	761.332	0
4981286	1553.3	15.6	55	-0.275616	762.303	0
4.98129e+06	1553.1	16	54.8	-0.282683	763.277	0
4.98129e+06	1553	16.2	54.7	-0.286216	764.364	0
4.98129e+06	1552.9	16.5	54.6	-0.291516	765.336	0
4.98129e+06	1552.9	16.7	54.6	-0.29505	766.309	0
4981287	1552.8	16.6	54.5	-0.293283	767.281	0
4981286	1553.2	15.6	54.9	-0.275616	768.366	0
4.98128e+06	1554.6	13.8	56.3	-0.243814	769.34	0
4981284	1556.2	13.6	57.9	-0.24028	770.313	0
4.98128e+06	1556.6	13.5	58.3	-0.238513	771.287	0
4.98128e+06	1556.9	13.2	58.6	-0.233213	772.374	0
4.98128e+06	1557.2	13	58.9	-0.22968	773.343	0
4.98128e+06	1557.5	13	59.2	-0.22968	774.315	0
4.98128e+06	1557.6	13.2	59.3	-0.233213	775.289	0
4981284	1557.1	13.6	58.8	-0.24028	776.374	0
4.98128e+06	1556.9	14.2	58.6	-0.250881	777.343	0
4.98129e+06	1555.9	15.1	57.6	-0.266782	778.315	0
4.98129e+06	1555.9	15.2	57.6	-0.268548	779.289	0
4.98129e+06	1555.4	15.9	57.1	-0.280916	780.374	0
4.98129e+06	1555.4	16.8	57.1	-0.296817	781.343	0
4.98129e+06	1554.4	17.4	56.1	-0.307417	782.315	0
4.98129e+06	1554.1	17.7	55.8	-0.312718	783.291	0
4.98129e+06	1553.8	18.3	55.5	-0.323318	784.374	0
4.98129e+06	1553.4	18.7	55.1	-0.330385	785.343	0
4.98129e+06	1553.1	18.9	54.8	-0.333919	786.315	0
4.98129e+06	1553.1	18.9	54.8	-0.333919	787.289	0
4.98129e+06	1553.2	18.9	54.9	-0.333919	788.374	0
4.98129e+06	1553.3	19	55	-0.335686	789.343	0
4981290	1553	19.6	54.7	-0.346286	790.315	0
4.98129e+06	1552.7	19.7	54.4	-0.348053	791.404	0
4.98129e+06	1552.7	19.7	54.4	-0.348053	792.374	0
4.98129e+06	1552.7	19.8	54.4	-0.34982	793.343	0
4.98129e+06	1552.8	19.7	54.5	-0.348053	794.315	0
4.98129e+06	1553.3	19.5	55	-0.344519	795.404	0
4.98129e+06	1553.3	19.5	55	-0.344519	796.374	0
4.98129e+06	1553.3	19.5	55	-0.344519	797.343	0
4.98129e+06	1553.4	19.4	55.1	-0.342753	798.315	0
4.98129e+06	1553.6	19.5	55.3	-0.344519	799.404	0
4.98129e+06	1553.4	19.7	55.1	-0.348053	800.374	0
4.98129e+06	1553.6	18.9	55.3	-0.333919	801.354	0
4.98129e+06	1554.5	18.8	56.2	-0.332152	802.328	0
4.98129e+06	1554.4	18.7	56.1	-0.330385	803.415	0
4.98129e+06	1555.2	17.3	56.9	-0.30565	804.386	0
4.98129e+06	1557.6	15.4	59.3	-0.272082	805.36	0
4.98129e+06	1558.1	15.5	59.8	-0.273849	806.332	0
4.98129e+06	1558.1	15.4	59.8	-0.272082	807.417	0
4.98128e+06	1560.2	13.1	61.9	-0.231446	808.386	0
4.98128e+06	1559.8	13.9	61.5	-0.245581	809.36	0
4.98128e+06	1559.8	13.9	61.5	-0.245581	810.332	0
4.98128e+06	1559.7	14	61.4	-0.247347	811.417	0
4.98128e+06	1559.6	14.2	61.3	-0.250881	812.386	0
4.98128e+06	1559.5	14.2	61.2	-0.250881	813.36	0
4.98128e+06	1559.5	14.4	61.2	-0.254414	814.332	0
4.98128e+06	1559.4	14.4	61.1	-0.254414	815.417	0
4.98128e+06	1559.5	14.5	61.2	-0.256181	816.386	0
4981285	1559.4	14.6	61.1	-0.257948	817.36	0
4981285	1559.4	14.6	61.1	-0.257948	818.332	0
4.98129e+06	1559.4	14.7	61.1	-0.259715	819.417	0
4981285	1559.4	14.6	61.1	-0.257948	820.386	0
4981285	1559.6	14.6	61.3	-0.257948	821.36	0
4.98129e+06	1559.6	14.7	61.3	-0.259715	822.332	0
4.98129e+06	1559.6	14.8	61.3	-0.261481	823.417	0
4.98129e+06	1559.6	14.7	61.3	-0.259715	824.386	0
4.98129e+06	1559.6	14.7	61.3	-0.259715	825.36	0
4.98129e+06	1559.7	14.7	61.4	-0.259715	826.332	0
4.98129e+06	1559.8	14.7	61.5	-0.259715	827.417	0
4981285	1559.8	14.6	61.5	-0.257948	828.386	0
4981285	1559.9	14.6	61.6	-0.257948	829.36	0
4981285	1559.9	14.6	61.6	-0.257948	830.334	0
4981285	1560	14.6	61.7	-0.257948	831.417	0
4.98128e+06	1560.1	14.5	61.8	-0.256181	832.386	0
4.98128e+06	1560.1	14.5	61.8	-0.256181	833.36	0
4.98129e+06	1559.9	14.9	61.6	-0.263248	834.332	0
4.98129e+06	1559.5	15.2	61.2	-0.268548	835.417	0
4.98129e+06	1559.2	15.5	60.9	-0.273849	836.386	0
4.98129e+06	1559	15.7	60.7	-0.277382	837.36	0
4.98129e+06	1558.7	15.9	60.4	-0.280916	838.447	0
4.98129e+06	1558.6	16.2	60.3	-0.286216	839.417	0
4.98129e+06	1558.6	16.5	60.3	-0.291516	840.386	0
4.98129e+06	1558.1	17.2	59.8	-0.303884	841.36	0
4.98129e+06	1557.6	17.3	59.3	-0.30565	842.447	0
4.98129e+06	1557.4	17.4	59.1	-0.307417	843.417	0
4.98129e+06	1557.3	17.2	59	-0.303884	844.386	0
4.98129e+06	1557.7	17	59.4	-0.30035	845.36	0
4.98129e+06	1557.7	17.1	59.4	-0.302117	846.447	0
4.98129e+06	1557.8	17.1	59.5	-0.302117	847.417	0
4.98129e+06	1557.9	16.9	59.6	-0.298584	848.386	0
4.98129e+06	1558	16.9	59.7	-0.298584	849.36	0
4.98129e+06	1558	17.1	59.7	-0.302117	850.447	0
4.98129e+06	1558	17	59.7	-0.30035	851.426	0
4.98129e+06	1558.1	17.1	59.8	-0.302117	852.398	0
4.98129e+06	1558.1	17.1	59.8	-0.302117	853.372	0
4.98129e+06	1558.1	17.1	59.8	-0.302117	854.457	0
4.98129e+06	1558.1	17	59.8	-0.30035	855.428	0
4.98129e+06	1558.1	17.1	59.8	-0.302117	856.402	0
4.98129e+06	1558.2	16.9	59.9	-0.298584	857.374	0
4.98129e+06	1558.3	16.7	60	-0.29505	858.457	0
4981287	1558.6	16.6	60.3	-0.293283	859.428	0
4.98129e+06	1558.5	16.7	60.2	-0.29505	860.402	0
4.98129e+06	1558.5	16.8	60.2	-0.296817	861.374	0
4.98129e+06	1558.5	16.9	60.2	-0.298584	862.457	0
4.98129e+06	1558.5	16.9	60.2	-0.298584	863.428	0
4.98129e+06	1558.4	17	60.1	-0.30035	864.402	0
4.98129e+06	1558.2	17.1	59.9	-0.302117	865.374	0
4.98129e+06	1558.1	17.2	59.8	-0.303884	866.457	0
4.98129e+06	1558	17.3	59.7	-0.30565	867.428	0
4.98129e+06	1558	17.3	59.7	-0.30565	868.402	0
4.98129e+06	1558	17.3	59.7	-0.30565	869.374	0
4.98129e+06	1558	17.2	59.7	-0.303884	870.457	0
4.98129e+06	1558	17.2	59.7	-0.303884	871.428	0
4.98129e+06	1558.1	17.1	59.8	-0.302117	872.402	0
4.98129e+06	1558.2	17.2	59.9	-0.303884	873.374	0
4.98129e+06	1558.2	17.1	59.9	-0.302117	874.457	0
4.98129e+06	1558.3	17.2	60	-0.303884	875.428	0
4.98129e+06	1558.3	17.3	60	-0.30565	876.402	0
4.98129e+06	1558.3	17.2	60	-0.303884	877.376	0
4.98129e+06	1558.2	17.2	59.9	-0.303884	878.461	0
4.98129e+06	1558.3	17.1	60	-0.302117	879.434	0
4.98129e+06	1558.4	16.9	60.1	-0.298584	880.406	0
4.98129e+06	1559	16.2	60.7	-0.286216	881.378	0
4.98129e+06	1559	16.1	60.7	-0.284449	882.465	0
4.98129e+06	1558.9	16.2	60.6	-0.286216	883.438	0
4.98129e+06	1558.9	16	60.6	-0.282683	884.412	0
4.98129e+06	1558.9	16.1	60.6	-0.284449	885.385	0
4.98129e+06	1558.9	16.2	60.6	-0.286216	886.472	0
4.98129e+06	1558.9	16.2	60.6	-0.286216	887.446	0
4.98129e+06	1558.8	16.4	60.5	-0.28975	888.416	0
4.98129e+06	1558.9	16.2	60.6	-0.286216	889.385	0
4.98129e+06	1559	16.2	60.7	-0.286216	890.472	0
4.98129e+06	1559.1	16.1	60.8	-0.284449	891.446	0
4.98129e+06	1559.2	16.1	60.9	-0.284449	892.416	0
4.98129e+06	1559.3	16	61	-0.282683	893.389	0
4.98129e+06	1559.4	16	61.1	-0.282683	894.478	0
4.98129e+06	1559.5	15.9	61.2	-0.280916	895.45	0
4.98129e+06	1559.5	15.7	61.2	-0.277382	896.424	0
4.98129e+06	1559.6	15.7	61.3	-0.277382	897.397	0
4.98129e+06	1559.6	15.5	61.3	-0.273849	898.486	0
4.98129e+06	1559.6	15.4	61.3	-0.272082	899.458	0
4.98129e+06	1559.7	15.2	61.4	-0.268548	900.427	0
4.98129e+06	1559.7	15	61.4	-0.265015	901.407	0
4.98129e+06	1559.8	14.9	61.5	-0.263248	902.494	0
4.98129e+06	1559.8	14.7	61.5	-0.259715	903.467	0
4.98128e+06	1559.9	14.5	61.6	-0.256181	904.439	0
4.98128e+06	1559.9	14.3	61.6	-0.252648	905.413	0
4.98128e+06	1560	14	61.7	-0.247347	906.498	0
4.98128e+06	1560	13.7	61.7	-0.242047	907.469	0
4.98128e+06	1560.1	13.5	61.8	-0.238513	908.443	0
4.98128e+06	1560.1	13.2	61.8	-0.233213	909.415	0
4.98128e+06	1560.2	13	61.9	-0.22968	910.5	0
4981283	1560.2	12.6	61.9	-0.222612	911.469	0
4.98128e+06	1561.4	11.2	63.1	-0.197878	912.443	0
4.98128e+06	1561.4	10.9	63.1	-0.192578	913.415	0
4.98128e+06	1561.5	10.7	63.2	-0.189044	914.5	0
4.98128e+06	1561.5	10.5	63.2	-0.18551	915.469	0
4.98128e+06	1561.5	10.2	63.2	-0.18021	916.443	0
4.98128e+06	1561.4	10	63.1	-0.176677	917.415	0
4.98128e+06	1561.3	9.7	63	-0.171376	918.5	0
4.98128e+06	1561.4	9.4	63.1	-0.166076	919.469	0
4.98128e+06	1561.4	9.1	63.1	-0.160776	920.443	0
4.98128e+06	1561.4	8.7	63.1	-0.153709	921.415	0
4.98128e+06	1561.4	8.3	63.1	-0.146642	922.5	0
4.98128e+06	1561.4	7.8	63.1	-0.137808	923.469	0
4.98128e+06	1561.4	7.4	63.1	-0.130741	924.443	0
4.98128e+06	1562	6.1	63.7	-0.107773	925.417	0
4.98128e+06	1562.5	5.4	64.2	-0.0954054	926.5	0
4.98128e+06	1562.5	5	64.2	-0.0883383	927.469	0
4981275	1562.5	4.6	64.2	-0.0812712	928.443	0
4.98127e+06	1562.6	4.2	64.3	-0.0742042	929.415	0
4.98127e+06	1562.6	3.9	64.3	-0.0689039	930.5	0
4.98127e+06	1562.4	3.7	64.1	-0.0653703	931.469	0
4.98127e+06	1562.2	3.3	63.9	-0.0583033	932.443	0
4.98127e+06	1562.2	2.7	63.9	-0.0477027	933.53	0
4.98127e+06	1562.2	2.3	63.9	-0.0406356	934.5	0
4.98127e+06	1562.2	1.9	63.9	-0.0335686	935.469	0
4981272	1562.2	1.6	63.9	-0.0282683	936.443	0
4.98127e+06	1562.2	1.4	63.9	-0.0247347	937.53	0
4.98127e+06	1562.3	1	64	-0.0176677	938.5	0
4.98127e+06	1562.3	0.9	64	-0.0159009	939.469	0
4.98127e+06	1562.3	0.7	64	-0.0123674	940.443	0
4981271	1562.4	0.6	64.1	-0.0106006	941.53	0
4981271	1562.4	0.6	64.1	-0.0106006	942.5	0
4.98127e+06	1562.4	0.5	64.1	-0.00883383	943.469	0
4.98127e+06	1562.4	0.5	64.1	-0.00883383	944.439	0
4981271	1562.4	0.6	64.1	-0.0106006	945.526	0
4.98127e+06	1562.5	0.7	64.2	-0.0123674	946.498	0
4.98127e+06	1562.5	0.8	64.2	-0.0141341	947.467	0
4.98127e+06	1562.5	0.9	64.2	-0.0159009	948.437	0
4.98127e+06	1562.6	1.2	64.3	-0.0212012	949.522	0
4.98127e+06	1562.6	1.4	64.3	-0.0247347	950.494	0
4981272	1562.6	1.6	64.3	-0.0282683	951.466	0
4.98127e+06	1562.6	1.9	64.3	-0.0335686	952.441	0
4.98127e+06	1562.6	2.3	64.3	-0.0406356	953.53	0
4981273	1562.7	2.6	64.4	-0.0459359	954.5	0
4.98127e+06	1562.7	2.9	64.4	-0.0512362	955.469	0
4.98127e+06	1562.7	3.3	64.4	-0.0583033	956.445	0
4.98127e+06	1562.6	3.8	64.3	-0.0671371	957.532	0
4.98127e+06	1562.7	4.2	64.4	-0.0742042	958.506	0
4981275	1562.7	4.6	64.4	-0.0812712	959.479	0
4.98128e+06	1562.7	5.2	64.4	-0.0918718	960.453	0
4981276	1562.7	5.6	64.4	-0.0989389	961.54	0
4.98128e+06	1562.7	6.1	64.4	-0.107773	962.511	0
4.98128e+06	1562.7	6.8	64.4	-0.12014	963.485	0
4.98128e+06	1562.7	7.2	64.4	-0.127207	964.457	0
4.98128e+06	1562.6	7.9	64.3	-0.139574	965.542	0
4.98128e+06	1562.6	8.5	64.3	-0.150175	966.511	0
4.98128e+06	1562.6	8.9	64.3	-0.157242	967.485	0
4.98128e+06	1562.7	9.4	64.4	-0.166076	968.457	0
4.98128e+06	1562.9	9.9	64.6	-0.17491	969.542	0
4.98128e+06	1563	10.4	64.7	-0.183744	970.511	0
4.98128e+06	1563	10.7	64.7	-0.189044	971.485	0
4.98128e+06	1563	10.7	64.7	-0.189044	972.459	0
4.98128e+06	1563.5	10.4	65.2	-0.183744	973.542	0
4.98128e+06	1564.1	7.7	65.8	-0.136041	974.511	0
4.98128e+06	1568.4	4.7	70.1	-0.083038	975.485	0
4.98128e+06	1569.6	5.8	71.3	-0.102472	976.457	0
4.98127e+06	1571.6	-0.6	73.3	0.0106006	977.542	0
4.98127e+06	1576.1	-1.1	77.8	0.0194344	978.514	0
4.98128e+06	1572	8	73.7	-0.141341	979.488	0
4.98128e+06	1567.5	8.4	69.2	-0.148408	980.573	0
4981279	1567.4	8.6	69.1	-0.151942	981.545	0
4981279	1567.6	8.6	69.3	-0.151942	982.518	0
4.98128e+06	1566.6	10	68.3	-0.176677	983.49	0
4.98128e+06	1565.5	11.1	67.2	-0.196111	984.575	0
4.98128e+06	1564.3	12.5	66	-0.220846	985.549	0
4.98128e+06	1564.3	13.2	66	-0.233213	986.522	0
4.98128e+06	1563.8	13.9	65.5	-0.245581	987.496	0
4.98128e+06	1563.3	14.2	65	-0.250881	988.469	0
4.98128e+06	1563.2	13.4	64.9	-0.236747	989.556	0
4.98128e+06	1564.4	13.2	66.1	-0.233213	990.53	0
4.98128e+06	1564.1	12.9	65.8	-0.227913	991.5	0
4.98128e+06	1565.1	11.5	66.8	-0.203178	992.583	0
4.98128e+06	1567.5	9.7	69.2	-0.171376	993.552	0
4.98128e+06	1568.1	9.7	69.8	-0.171376	994.526	0
4981280	1568.1	9.6	69.8	-0.169609	995.498	0
4981280	1568.2	9.6	69.9	-0.169609	996.583	0
4981280	1568.2	9.6	69.9	-0.169609	997.552	0
4.98128e+06	1568.3	9.5	70	-0.167843	998.526	0
4.98128e+06	1568.4	9.4	70.1	-0.166076	999.498	0
4.98128e+06	1568.5	9.4	70.2	-0.166076	1000.58	0
4.98128e+06	1568.5	9.7	70.2	-0.171376	1001.56	0
4.98128e+06	1568.1	10	69.8	-0.176677	1002.54	0
4.98128e+06	1568	10	69.7	-0.176677	1003.51	0
4.98128e+06	1568	9.9	69.7	-0.17491	1004.48	0
4.98128e+06	1568	9.9	69.7	-0.17491	1005.57	0
4.98128e+06	1568.2	9.8	69.9	-0.173143	1006.54	0
4981280	1568.3	9.6	70	-0.169609	1007.51	0
4.98128e+06	1568.5	9.4	70.2	-0.166076	1008.6	0
4.98128e+06	1568.8	9.3	70.5	-0.164309	1009.57	0
4.98128e+06	1569	9.1	70.7	-0.160776	1010.54	0
4.98128e+06	1569.3	8.9	71	-0.157242	1011.51	0
4.98128e+06	1569.6	8.7	71.3	-0.153709	1012.6	0
4.98128e+06	1569.8	8.5	71.5	-0.150175	1013.57	0
4.98128e+06	1570.2	8.3	71.9	-0.146642	1014.54	0
4.98128e+06	1570.2	7.8	71.9	-0.137808	1015.51	0
4981278	1570.8	7.6	72.5	-0.134274	1016.6	0
4.98128e+06	1571.2	7.3	72.9	-0.128974	1017.57	0
4.98128e+06	1571.7	6.8	73.4	-0.12014	1018.54	0
4.98128e+06	1572.3	5.4	74	-0.0954054	1019.51	0
4.98128e+06	1574.1	5.4	75.8	-0.0954054	1020.6	0
4981269	1575.9	-1.4	77.6	0.0247347	1021.57	0
4.98127e+06	1581.3	0.4	83	-0.00706706	1022.54	0
4.98127e+06	1576.3	4.2	78	-0.0742042	1023.51	0
4.98128e+06	1574.8	4.7	76.5	-0.083038	1024.6	0
4.98128e+06	1574.9	4.7	76.6	-0.083038	1025.57	0
4.98128e+06	1574.9	5	76.6	-0.0883383	1026.54	0
4.98128e+06	1574.2	5.7	75.9	-0.100706	1027.51	0
4.98128e+06	1574.4	5.5	76.1	-0.0971721	1028.6	0
4.98128e+06	1575.2	4.9	76.9	-0.0865715	1029.57	0
4.98127e+06	1575.2	4	76.9	-0.0706706	1030.54	0
4981273	1576.1	2.6	77.8	-0.0459359	1031.51	0
4981273	1577.6	2.6	79.3	-0.0459359	1032.6	0
4.98127e+06	1577.6	2.7	79.3	-0.0477027	1033.57	0
4.98127e+06	1577.4	3.8	79.1	-0.0671371	1034.55	0
4.98127e+06	1576.5	4.3	78.2	-0.0759709	1035.52	0
4.98127e+06	1576.4	4	78.1	-0.0706706	1036.61	0
4.98127e+06	1576.6	4.2	78.3	-0.0742042	1037.58	0
4.98127e+06	1576.9	4	78.6	-0.0706706	1038.55	0
4.98127e+06	1577.1	3.9	78.8	-0.0689039	1039.53	0
4.98127e+06	1577.2	3.9	78.9	-0.0689039	1040.61	0
4.98127e+06	1577.3	3.9	79	-0.0689039	1041.59	0
4.98127e+06	1577.5	3.7	79.2	-0.0653703	1042.56	0
4981274	1577.7	3.6	79.4	-0.0636036	1043.53	0
4.98127e+06	1577.9	3.5	79.6	-0.0618368	1044.62	0
4.98127e+06	1577.9	3.4	79.6	-0.06007	1045.59	0
4.98127e+06	1578.2	-3.5	79.9	0.0618368	1046.56	0
4.98127e+06	1586	-3	87.7	0.053003	1047.54	0
4.98127e+06	1583.7	0	85.4	0	1048.62	0
4.98127e+06	1581.5	0.5	83.2	-0.00883383	1049.59	0
4.98127e+06	1581.1	1	82.8	-0.0176677	1050.57	0
4.98127e+06	1580.8	1	82.5	-0.0176677	1051.54	0
4.98127e+06	1580.7	1.4	82.4	-0.0247347	1052.62	0
4981272	1580.5	1.6	82.2	-0.0282683	1053.59	0
4981272	1580.3	1.6	82	-0.0282683	1054.57	0
4.98127e+06	1580.6	1.5	82.3	-0.0265015	1055.54	0
4.98127e+06	1580.8	1.3	82.5	-0.022968	1056.62	0
4.98127e+06	1580.5	1.8	82.2	-0.0318018	1057.59	0
4.98127e+06	1580.3	2	82	-0.0353353	1058.57	0
4.98127e+06	1580.3	3.7	82	-0.0653703	1059.54	0
4.98128e+06	1578.7	4.9	80.4	-0.0865715	1060.62	0
4.98127e+06	1577.6	3.8	79.3	-0.0671371	1061.59	0
4981274	1578.9	3.6	80.6	-0.0636036	1062.57	0
4.98127e+06	1579	3.8	80.7	-0.0671371	1063.54	0
4.98127e+06	1578.9	3.7	80.6	-0.0653703	1064.62	0
4.98127e+06	1578.7	3.9	80.4	-0.0689039	1065.59	0
4981274	1579	3.6	80.7	-0.0636036	1066.57	0
4.98128e+06	1578.3	4.9	80	-0.0865715	1067.54	0
4.98128e+06	1577.7	5.2	79.4	-0.0918718	1068.62	0
4.98128e+06	1577.6	5.2	79.3	-0.0918718	1069.59	0
4.98128e+06	1577.6	5.2	79.3	-0.0918718	1070.57	0
4.98128e+06	1577.7	5.2	79.4	-0.0918718	1071.65	0
4.98128e+06	1577.5	5.5	79.2	-0.0971721	1072.62	0
4.98128e+06	1577.2	5.8	78.9	-0.102472	1073.59	0
4.98128e+06	1577.2	5.7	78.9	-0.100706	1074.56	0
4.98128e+06	1577.3	5.7	79	-0.100706	1075.66	0
4981276	1577.4	5.6	79.1	-0.0989389	1076.62	0
4.98128e+06	1577.5	5.7	79.2	-0.100706	1077.59	0
4.98128e+06	1577.5	5.5	79.2	-0.0971721	1078.56	0
4.98128e+06	1577.8	5	79.5	-0.0883383	1079.65	0
4.98127e+06	1578.8	3.8	80.5	-0.0671371	1080.62	0
4.98127e+06	1579.7	3.4	81.4	-0.06007	1081.59	0
4.98127e+06	1579.8	3.7	81.5	-0.0653703	1082.56	0
4981274	1579.8	3.6	81.5	-0.0636036	1083.65	0
4.98127e+06	1580	3.5	81.7	-0.0618368	1084.62	0
4981274	1579.9	3.6	81.6	-0.0636036	1085.59	0
4.98127e+06	1579.9	3.7	81.6	-0.0653703	1086.56	0
4.98127e+06	1579.7	3.9	81.4	-0.0689039	1087.65	0
4.98127e+06	1579.4	4	81.1	-0.0706706	1088.62	0
4.98127e+06	1579.4	3.9	81.1	-0.0689039	1089.59	0
4981274	1579.4	3.6	81.1	-0.0636036	1090.57	0
4.98127e+06	1579.7	3.3	81.4	-0.0583033	1091.65	0
4.98127e+06	1580	3.5	81.7	-0.0618368	1092.62	0
4981274	1579.7	3.6	81.4	-0.0636036	1093.59	0
4.98127e+06	1579.7	3.5	81.4	-0.0618368	1094.57	0
4981274	1579.8	3.6	81.5	-0.0636036	1095.65	0
4.98127e+06	1579.8	3.8	81.5	-0.0671371	1096.62	0
4.98127e+06	1579.8	3.9	81.5	-0.0689039	1097.59	0
4.98127e+06	1580	3.8	81.7	-0.0671371	1098.57	0
4.98127e+06	1580.3	3.7	82	-0.0653703	1099.66	0
4.98127e+06	1580.6	3.9	82.3	-0.0689039	1100.63	0
4.98127e+06	1580.7	4.5	82.4	-0.0795045	1101.61	0
4981275	1580.7	4.6	82.4	-0.0812712	1102.58	0
4981275	1580.6	4.6	82.3	-0.0812712	1103.67	0
4.98127e+06	1580.6	4.5	82.3	-0.0795045	1104.63	0
4.98127e+06	1580.7	4	82.4	-0.0706706	1105.61	0
4981274	1581.4	3.6	83.1	-0.0636036	1106.58	0
4981274	1581.5	3.6	83.2	-0.0636036	1107.67	0
4981274	1581.3	3.6	83	-0.0636036	1108.63	0
4.98127e+06	1581.2	3.5	82.9	-0.0618368	1109.61	0
4.98127e+06	1581.3	2.7	83	-0.0477027	1110.58	0
4.98127e+06	1582.2	2.1	83.9	-0.0371021	1111.67	0
4.98127e+06	1582.5	2	84.2	-0.0353353	1112.63	0
4.98127e+06	1582.7	2.1	84.4	-0.0371021	1113.61	0
4.98127e+06	1582.8	2.2	84.5	-0.0388689	1114.58	0
4.98127e+06	1582.6	2.5	84.3	-0.0441691	1115.67	0
4.98127e+06	1582.5	2.3	84.2	-0.0406356	1116.63	0
4.98127e+06	1582.9	1.9	84.6	-0.0335686	1117.61	0
4.98127e+06	1583.2	2.3	84.9	-0.0406356	1118.7	0
4.98127e+06	1583.2	2	84.9	-0.0353353	1119.67	0
4.98127e+06	1583.3	2.2	85	-0.0388689	1120.63	0
4.98127e+06	1582.7	2.4	84.4	-0.0424024	1121.61	0
4.98127e+06	1582.5	2.2	84.2	-0.0388689	1122.7	0
4.98127e+06	1582.6	2.1	84.3	-0.0371021	1123.67	0
4.98127e+06	1582.7	2	84.4	-0.0353353	1124.63	0
4.98127e+06	1582.9	1.7	84.6	-0.030035	1125.61	0
4.98127e+06	1583	1.7	84.7	-0.030035	1126.7	0
4981272	1583	1.6	84.7	-0.0282683	1127.67	0
4981272	1583	1.6	84.7	-0.0282683	1128.63	0
4.98127e+06	1583.1	1.3	84.8	-0.022968	1129.61	0
4.98127e+06	1583.3	1.1	85	-0.0194344	1130.7	0
4.98127e+06	1583.7	0.7	85.4	-0.0123674	1131.67	0
4.98127e+06	1584.1	0.2	85.8	-0.00353353	1132.63	0
4.98127e+06	1584.1	-0.3	85.8	0.0053003	1133.61	0
4.98127e+06	1584.5	-0.1	86.2	0.00176677	1134.7	0
4.98127e+06	1584.3	0.1	86	-0.00176677	1135.67	0
4.98127e+06	1584.2	0	85.9	0	1136.63	0
4.98127e+06	1584.3	0.2	86	-0.00353353	1137.61	0
4981271	1584.5	0.6	86.2	-0.0106006	1138.7	0
4.98127e+06	1585	1.8	86.7	-0.0318018	1139.67	0
4.98127e+06	1584.5	2.2	86.2	-0.0388689	1140.63	0
4.98127e+06	1584.1	2.3	85.8	-0.0406356	1141.61	0
4.98127e+06	1583.9	2	85.6	-0.0353353	1142.7	0
4.98127e+06	1583.9	1.8	85.6	-0.0318018	1143.67	0
4.98127e+06	1583.8	1.8	85.5	-0.0318018	1144.63	0
4981272	1583.8	1.6	85.5	-0.0282683	1145.61	0
4.98127e+06	1584.3	1	86	-0.0176677	1146.7	0
4.98127e+06	1584.9	0.3	86.6	-0.0053003	1147.67	0
4.98127e+06	1584.9	-0.1	86.6	0.00176677	1148.63	0
4.98127e+06	1585.2	-0.5	86.9	0.00883383	1149.72	0
4.98127e+06	1585.5	-0.6	87.2	0.0106006	1150.7	0
4.98127e+06	1585.7	-1	87.4	0.0176677	1151.67	0
4.98127e+06	1586.4	-2.8	88.1	0.0494694	1152.63	0
4.98127e+06	1588	-3.1	89.7	0.0547697	1153.72	0
4981267	1588.1	-3.4	89.8	0.06007	1154.7	0
4.98127e+06	1588.1	-3.5	89.8	0.0618368	1155.67	0
4.98127e+06	1588.1	-3.5	89.8	0.0618368	1156.63	0
4.98127e+06	1588.2	-3.7	89.9	0.0653703	1157.72	0
4.98127e+06	1588.6	-4.2	90.3	0.0742042	1158.7	0
4981266	1588.8	-4.4	90.5	0.0777377	1159.67	0
4.98127e+06	1589.3	-5	91	0.0883383	1160.63	0
4.98126e+06	1590.2	-5.8	91.9	0.102472	1161.72	0
4.98126e+06	1590.4	-6.1	92.1	0.107773	1162.7	0
4.98126e+06	1590.4	-6.3	92.1	0.111306	1163.67	0
4.98126e+06	1590.5	-6.5	92.2	0.11484	1164.64	0
4.98126e+06	1590.7	-7.5	92.4	0.132508	1165.73	0
4.98126e+06	1591	-7.7	92.7	0.136041	1166.7	0
4981263	1591.1	-7.4	92.8	0.130741	1167.67	0
4.98126e+06	1590.7	-6.8	92.4	0.12014	1168.64	0
4.98126e+06	1590.1	-5.7	91.8	0.100706	1169.72	0
4.98126e+06	1589.7	-6.1	91.4	0.107773	1170.69	0
4.98126e+06	1590	-6	91.7	0.106006	1171.66	0
4.98126e+06	1590	-6.1	91.7	0.107773	1172.64	0
4.98126e+06	1589.9	-6	91.6	0.106006	1173.72	0
4.98126e+06	1589.8	-6	91.5	0.106006	1174.69	0
4.98126e+06	1589.7	-5.9	91.4	0.104239	1175.66	0
4.98126e+06	1589.7	-6	91.4	0.106006	1176.64	0
4.98126e+06	1589.6	-6	91.3	0.106006	1177.72	0
4.98126e+06	1589.5	-5.8	91.2	0.102472	1178.7	0
4.98126e+06	1589.4	-5.8	91.1	0.102472	1179.67	0
4.98126e+06	1589.3	-5.8	91	0.102472	1180.64	0
4.98126e+06	1589.3	-5.9	91	0.104239	1181.73	0
4981264	1589.4	-6.4	91.1	0.113073	1182.71	0
4.98126e+06	1589.8	-6.6	91.5	0.116607	1183.68	0
4.98126e+06	1590	-6.7	91.7	0.118373	1184.65	0
4.98126e+06	1589.9	-6.8	91.6	0.12014	1185.74	0
4.98126e+06	1590	-6.9	91.7	0.121907	1186.71	0
4.98126e+06	1590	-7	91.7	0.123674	1187.68	0
4.98126e+06	1589.9	-6.9	91.6	0.121907	1188.65	0
4.98126e+06	1589.9	-7	91.6	0.123674	1189.74	0
4.98126e+06	1589.9	-7.1	91.6	0.12544	1190.71	0
4.98126e+06	1589.9	-7.1	91.6	0.12544	1191.68	0
4.98126e+06	1589.9	-7.1	91.6	0.12544	1192.66	0
4.98126e+06	1589.8	-7.2	91.5	0.127207	1193.74	0
4.98126e+06	1589.9	-7.3	91.6	0.128974	1194.72	0
4.98126e+06	1590	-7.3	91.7	0.128974	1195.69	0
4981263	1590	-7.4	91.7	0.130741	1196.66	0
4.98126e+06	1590	-7.5	91.7	0.132508	1197.75	0
4.98126e+06	1590	-7.6	91.7	0.134274	1198.72	0
4.98126e+06	1590	-7.7	91.7	0.136041	1199.69	0
4.98126e+06	1590	-7.9	91.7	0.139574	1200.66	0
4.98126e+06	1590.1	-8	91.8	0.141341	1201.76	0
4.98126e+06	1590.1	-8.2	91.8	0.144875	1202.73	0
4.98126e+06	1590.2	-8.3	91.9	0.146642	1203.7	0
4.98126e+06	1590.2	-8.5	91.9	0.150175	1204.67	0
4.98126e+06	1590.3	-8.5	92	0.150175	1205.76	0
4.98126e+06	1590.4	-8.6	92.1	0.151942	1206.73	0
4.98126e+06	1590.4	-8.6	92.1	0.151942	1207.71	0
4.98126e+06	1590.4	-8.9	92.1	0.157242	1208.68	0
4.98126e+06	1590.5	-8.9	92.2	0.157242	1209.76	0
4.98126e+06	1590.6	-9.1	92.3	0.160776	1210.74	0
4.98126e+06	1590.6	-9.1	92.3	0.160776	1211.71	0
4.98126e+06	1590.6	-9.1	92.3	0.160776	1212.68	0
4.98126e+06	1590.6	-9.3	92.3	0.164309	1213.76	0
4.98126e+06	1590.7	-9.5	92.4	0.167843	1214.74	0
4.98126e+06	1590.9	-9.6	92.6	0.169609	1215.71	0
4.98126e+06	1591.1	-10.1	92.8	0.178443	1216.68	0
4.98126e+06	1591.3	-10.1	93	0.178443	1217.76	0
4.98126e+06	1591.4	-10.3	93.1	0.181977	1218.74	0
4.98126e+06	1591.4	-10.3	93.1	0.181977	1219.71	0
4.98126e+06	1591.4	-10.8	93.1	0.190811	1220.68	0
4.98126e+06	1592.3	-11.2	94	0.197878	1221.77	0
4.98126e+06	1592.3	-11.1	94	0.196111	1222.74	0
4.98126e+06	1592.4	-11.3	94.1	0.199645	1223.71	0
4.98126e+06	1592.3	-11.1	94	0.196111	1224.68	0
4.98126e+06	1592.3	-11.3	94	0.199645	1225.77	0
4.98126e+06	1592.4	-11.3	94.1	0.199645	1226.75	0
4.98126e+06	1592.5	-11.3	94.2	0.199645	1227.72	0
4.98126e+06	1592.6	-11.3	94.3	0.199645	1228.69	0
4.98126e+06	1592.6	-11.3	94.3	0.199645	1229.78	0
4.98126e+06	1592.7	-11.3	94.4	0.199645	1230.75	0
4.98126e+06	1592.7	-11.3	94.4	0.199645	1231.72	0
4.98126e+06	1592.8	-11.3	94.5	0.199645	1232.69	0
4.98126e+06	1592.9	-11.2	94.6	0.197878	1233.78	0
4.98126e+06	1592.9	-11.1	94.6	0.196111	1234.75	0
4.98126e+06	1592.9	-10.8	94.6	0.190811	1235.72	0
4.98126e+06	1592.9	-11	94.6	0.194344	1236.69	0
4.98126e+06	1592.9	-11	94.6	0.194344	1237.78	0
4.98126e+06	1593	-11.1	94.7	0.196111	1238.75	0
4.98126e+06	1593.1	-11.1	94.8	0.196111	1239.72	0
4.98126e+06	1593.1	-11	94.8	0.194344	1240.69	0
4.98126e+06	1593	-10.8	94.7	0.190811	1241.78	0
4.98126e+06	1592.7	-10.6	94.4	0.187277	1242.75	0
4.98126e+06	1592.7	-10.7	94.4	0.189044	1243.72	0
4.98126e+06	1592.8	-10.8	94.5	0.190811	1244.81	0
4.98126e+06	1592.8	-10.9	94.5	0.192578	1245.78	0
4.98126e+06	1592.7	-10.9	94.4	0.192578	1246.75	0
4.98126e+06	1592.7	-11	94.4	0.194344	1247.72	0
4.98126e+06	1592.7	-11	94.4	0.194344	1248.81	0
4.98126e+06	1592.7	-11.1	94.4	0.196111	1249.78	0
4.98126e+06	1592.7	-11.1	94.4	0.196111	1250.75	0
4.98126e+06	1592.6	-11.2	94.3	0.197878	1251.72	0
4.98126e+06	1592.6	-11.3	94.3	0.199645	1252.81	0
4981259	1592.6	-11.4	94.3	0.201411	1253.78	0
4981259	1592.7	-11.4	94.4	0.201411	1254.75	0
4.98126e+06	1592.7	-11.5	94.4	0.203178	1255.72	0
4.98126e+06	1592.8	-11.6	94.5	0.204945	1256.81	0
4.98126e+06	1592.8	-11.9	94.5	0.210245	1257.78	0
4.98126e+06	1592.8	-11.9	94.5	0.210245	1258.75	0
4.98126e+06	1592.8	-12	94.5	0.212012	1259.72	0
4.98126e+06	1592.8	-12	94.5	0.212012	1260.81	0
4.98126e+06	1592.8	-12.1	94.5	0.213779	1261.78	0
4.98126e+06	1592.8	-12.1	94.5	0.213779	1262.75	0
4.98126e+06	1592.8	-12.3	94.5	0.217312	1263.72	0
4981258	1592.9	-12.4	94.6	0.219079	1264.81	0
4.98126e+06	1592.9	-12.5	94.6	0.220846	1265.78	0
4.98126e+06	1592.9	-12.6	94.6	0.222612	1266.75	0
4.98126e+06	1593	-13.1	94.7	0.231446	1267.72	0
4.98126e+06	1593.3	-13.3	95	0.23498	1268.81	0
4981257	1593.4	-13.4	95.1	0.236747	1269.78	0
4.98126e+06	1593.4	-13.5	95.1	0.238513	1270.76	0
4.98126e+06	1593.4	-13.6	95.1	0.24028	1271.73	0
4.98126e+06	1593.5	-13.7	95.2	0.242047	1272.82	0
4.98126e+06	1593.5	-13.8	95.2	0.243814	1273.79	0
4.98126e+06	1593.5	-13.8	95.2	0.243814	1274.76	0
4.98126e+06	1593.6	-14.3	95.3	0.252648	1275.73	0
4.98126e+06	1594.5	-15	96.2	0.265015	1276.82	0
4.98126e+06	1594.5	-15	96.2	0.265015	1277.79	0
4.98126e+06	1594.4	-14.8	96.1	0.261481	1278.76	0
4.98126e+06	1594.4	-15	96.1	0.265015	1279.73	0
4.98126e+06	1594.4	-15.1	96.1	0.266782	1280.82	0
4.98126e+06	1594.4	-15.1	96.1	0.266782	1281.79	0
4.98126e+06	1594.5	-15.1	96.2	0.266782	1282.76	0
4981255	1594.6	-15.4	96.3	0.272082	1283.73	0
4.98126e+06	1595	-15.3	96.7	0.270315	1284.82	0
4981255	1594	-15.4	95.7	0.272082	1285.79	0
4.98125e+06	1594.2	-15.5	95.9	0.273849	1286.76	0
4.98125e+06	1594.3	-16.1	96	0.284449	1287.73	0
4981254	1594.6	-16.4	96.3	0.28975	1288.82	0
4.98125e+06	1594.7	-16.5	96.4	0.291516	1289.79	0
4.98125e+06	1594.7	-16.6	96.4	0.293283	1290.76	0
4.98125e+06	1594.7	-16.8	96.4	0.296817	1291.85	0
4.98125e+06	1594.8	-17	96.5	0.30035	1292.82	0
4.98125e+06	1594.8	-17.1	96.5	0.302117	1293.79	0
4.98125e+06	1594.8	-17.2	96.5	0.303884	1294.76	0
4981253	1594.9	-17.4	96.6	0.307417	1295.85	0
4.98125e+06	1594.9	-17.5	96.6	0.309184	1296.82	0
4.98125e+06	1595	-17.7	96.7	0.312718	1297.8	0
4.98125e+06	1595.1	-18	96.8	0.318018	1298.77	0
4.98125e+06	1595.1	-18.2	96.8	0.321551	1299.86	0
4.98125e+06	1595	-18.3	96.7	0.323318	1300.83	0
4.98125e+06	1595	-18.5	96.7	0.326852	1301.81	0
4.98125e+06	1595.1	-18.7	96.8	0.330385	1302.78	0
4.98125e+06	1595.2	-19.1	96.9	0.337452	1303.76	0
4.98125e+06	1595.2	-19.3	96.9	0.340986	1304.84	0
4.98125e+06	1595.2	-19.6	96.9	0.346286	1305.81	0
4.98125e+06	1595.7	-20.2	97.4	0.356887	1306.79	0
4981250	1595.3	-20.4	97	0.36042	1307.76	0
4.98125e+06	1595.4	-20.6	97.1	0.363954	1308.84	0
4.98125e+06	1595.4	-20.8	97.1	0.367487	1309.82	0
4.98125e+06	1595.4	-21.3	97.1	0.376321	1310.79	0
4.98125e+06	1595.5	-21.7	97.2	0.383388	1311.76	0
4.98125e+06	1595.5	-22.1	97.2	0.390455	1312.85	0
4.98125e+06	1595.6	-22.5	97.3	0.397522	1313.82	0
4.98125e+06	1595.6	-23.3	97.3	0.411656	1314.79	0
4.98125e+06	1595.9	-23.5	97.6	0.41519	1315.77	0
4981247	1595.5	-23.4	97.2	0.413423	1316.85	0
4.98125e+06	1595.3	-24	97	0.424024	1317.83	0
4981246	1595.3	-24.4	97	0.431091	1318.8	0
4.98125e+06	1595.3	-25	97	0.441692	1319.77	0
4.98125e+06	1595.3	-25.3	97	0.446992	1320.86	0
4.98124e+06	1595.3	-25.8	97	0.455826	1321.83	0
4.98124e+06	1595.3	-26.1	97	0.461126	1322.8	0
4981244	1595.3	-26.4	97	0.466426	1323.78	0
4.98124e+06	1595.4	-26.7	97.1	0.471726	1324.86	0
4.98124e+06	1595.4	-27	97.1	0.477027	1325.84	0
4.98124e+06	1595.4	-27.2	97.1	0.48056	1326.81	0
4.98124e+06	1595.5	-27.5	97.2	0.485861	1327.78	0
4.98124e+06	1595.5	-27.7	97.2	0.489394	1328.87	0
4.98124e+06	1595.6	-27.6	97.3	0.487627	1329.84	0
4.98124e+06	1595.5	-27.8	97.2	0.491161	1330.81	0
4.98124e+06	1595.5	-27.9	97.2	0.492928	1331.79	0
4.98124e+06	1595.5	-28	97.2	0.494694	1332.87	0
4.98124e+06	1595.6	-28	97.3	0.494694	1333.84	0
4.98124e+06	1595.6	-28	97.3	0.494694	1334.82	0
4.98124e+06	1595.7	-27.9	97.4	0.492928	1335.79	0
4.98124e+06	1595.7	-27.9	97.4	0.492928	1336.87	0
4.98124e+06	1595.7	-27.8	97.4	0.491161	1337.84	0
4.98124e+06	1595.7	-27.6	97.4	0.487627	1338.82	0
4.98124e+06	1595.8	-27.5	97.5	0.485861	1339.79	0
4981243	1595.8	-27.4	97.5	0.484094	1340.88	0
4.98124e+06	1595.8	-27.2	97.5	0.48056	1341.84	0
4.98124e+06	1595.8	-26.9	97.5	0.47526	1342.82	0
4.98124e+06	1595.9	-26.6	97.6	0.46996	1343.79	0
4981244	1596	-26.4	97.7	0.466426	1344.88	0
4.98124e+06	1596	-26.1	97.7	0.461126	1345.84	0
4.98124e+06	1596.1	-25.9	97.8	0.457592	1346.82	0
4.98124e+06	1596.3	-25.6	98	0.452292	1347.79	0
4.98124e+06	1596.5	-25.5	98.2	0.450525	1348.88	0
4981244	1597.5	-26.4	99.2	0.466426	1349.86	0
4.98124e+06	1598.7	-26.6	100.4	0.46996	1350.83	0
4.98124e+06	1598.8	-26.3	100.5	0.46466	1351.8	0
4.98124e+06	1598.9	-25.8	100.6	0.455826	1352.88	0
4.98124e+06	1598.9	-25.5	100.6	0.450525	1353.86	0
4.98125e+06	1599.1	-25.2	100.8	0.445225	1354.83	0
4.98125e+06	1599.3	-24.9	101	0.439925	1355.8	0
4.98125e+06	1599.5	-25	101.2	0.441692	1356.89	0
4.98125e+06	1599.9	-25.2	101.6	0.445225	1357.86	0
4.98124e+06	1600.5	-25.6	102.2	0.452292	1358.84	0
4.98124e+06	1601.1	-26.2	102.8	0.462893	1359.81	0
4.98124e+06	1602	-26.3	103.7	0.46466	1360.89	0
4.98124e+06	1602.1	-26.2	103.8	0.462893	1361.87	0
4.98124e+06	1602.4	-26.3	104.1	0.46466	1362.84	0
4.98124e+06	1603.3	-27.6	105	0.487627	1363.81	0
4981241	1606.2	-29.4	107.9	0.519429	1364.89	0
4.98124e+06	1604.6	-27.6	106.3	0.487627	1365.87	0
4.98124e+06	1605.7	-28.8	107.4	0.508829	1366.84	0
4.98124e+06	1606.9	-29.8	108.6	0.526496	1367.92	0
4.98124e+06	1606.9	-30.3	108.6	0.53533	1368.89	0
4.98124e+06	1607.7	-31.3	109.4	0.552998	1369.86	0
4.98124e+06	1608.6	-32.1	110.3	0.567132	1370.83	0
4.98121e+06	1610.7	-63.3	112.4	1.11836	1371.92	0
4.98122e+06	1645.5	-53.7	147.2	0.948753	1372.89	0
4.98119e+06	1640.5	-77.5	142.2	1.36924	1373.86	0
4981191	1656.2	-79.4	157.9	1.40281	1374.83	0
4.98118e+06	1662.5	-86.1	164.2	1.52119	1375.92	0
4.98202e+06	1882.1	749.5	383.8	-13.2419	1376.89	0
4.98247e+06	2921.2	1199.7	1422.9	-21.1959	1377.87	0
4.98114e+06	1826.5	-129.3	328.2	2.28443	1378.84	0
4.98115e+06	1672.2	-124.8	173.9	2.20492	1379.93	0
4.98145e+06	2406.3	178.2	908	-3.14838	1380.9	0
4.98122e+06	1635.6	-55.2	137.3	0.975255	1381.87	0
4.98114e+06	1635.6	-130.3	137.3	2.3021	1382.84	0
4.98116e+06	1718.6	-113.9	220.3	2.01235	1383.93	0
4.97643e+06	1688.7	-4839.7	190.4	85.5062	1384.9	0
4.98324e+06	1886.5	1973.2	388.2	-34.8618	1385.87	0
4.9811e+06	2644.2	-173	1145.9	3.05651	1386.84	0
4.98114e+06	1762.4	-133.3	264.1	2.3551	1387.93	0
4.98117e+06	1709	-102.6	210.7	1.8127	1388.9	0
4.98126e+06	1644.7	-11.3	146.4	0.199645	1389.87	0
4.96991e+06	1892	-11364.6	393.7	200.786	1390.84	0
4.97373e+06	1898.9	-7545.3	400.6	133.308	1391.93	0
4.98216e+06	1788.1	893	289.8	-15.7772	1392.9	0
4.98205e+06	1966.7	774.7	468.4	-13.6871	1393.87	0
4.98287e+06	2290.8	1597.9	792.5	-28.2312	1394.84	0
4983195	2142.5	1924.6	644.2	-34.0032	1395.92	0
4.98322e+06	2200.5	1954.3	702.2	-34.5279	1396.89	0
4.98325e+06	2200.5	1983.3	702.2	-35.0403	1397.86	0
4.98329e+06	2212.5	2019.4	714.2	-35.6781	1398.94	0
4.9837e+06	2469.4	2429.5	971.1	-42.9236	1399.91	0
4.98405e+06	2592.6	2781.7	1094.3	-49.1461	1400.88	0
4.98435e+06	2693.9	3076.5	1195.6	-54.3546	1401.87	0
4.98463e+06	2769.7	3354.9	1271.4	-59.2732	1402.84	0
4.9847e+06	2672.3	3432.9	1174	-60.6513	1403.92	0
4.98467e+06	2554.5	3402.7	1056.2	-60.1178	1404.9	0
4.98455e+06	2522.2	3281.2	1023.9	-57.9711	1405.87	0
4.98448e+06	2680.2	3212.4	1181.9	-56.7556	1406.84	0
4984503	2659.2	3232.6	1160.9	-57.1125	1407.92	0
4.98424e+06	2893.7	2967.4	1395.4	-52.427	1408.9	0
4.98442e+06	3031.8	3145.4	1533.5	-55.5719	1409.87	0
4984737	3172	3466.6	1673.7	-61.2467	1410.84	0
4.98499e+06	3108.3	3723.3	1610	-65.782	1411.93	0
4.98512e+06	3108.3	3849.3	1610	-68.0081	1412.9	0
4.98503e+06	3022.7	3759.9	1524.4	-66.4286	1413.88	0
4.98489e+06	2938.4	3622.9	1440.1	-64.0082	1414.96	0
4.98487e+06	2902.8	3596.4	1404.5	-63.54	1415.93	0
4.98471e+06	2917.1	3438.7	1418.8	-60.7538	1416.9	0
4.98461e+06	3067.8	3340.5	1569.5	-59.0188	1417.87	0
4984503	3263.8	3232.6	1765.5	-57.1125	1418.96	0
4.98471e+06	3459.3	3437.4	1961	-60.7308	1419.93	0
4.98492e+06	3560.2	3651.9	2061.9	-64.5205	1420.9	0
4.98524e+06	3703.1	3974.1	2204.8	-70.213	1421.87	0
4.98543e+06	3679.7	4155.9	2181.4	-73.425	1422.96	0
4.98538e+06	3530.6	4106.2	2032.3	-72.5469	1423.93	0
4.98537e+06	3492.5	4096.4	1994.2	-72.3738	1424.9	0
4.98536e+06	3422.8	4088	1924.5	-72.2254	1425.87	0
4.98525e+06	3563	3980.7	2064.7	-70.3297	1426.96	0
4985311	3563	4040.6	2064.7	-71.388	1427.93	0
4.98528e+06	3735.1	4006.2	2236.8	-70.7802	1428.9	0
4.98519e+06	3800	3915.1	2301.7	-69.1707	1429.87	0
4.98505e+06	3923.9	3778.8	2425.6	-66.7626	1430.96	0
2.73626e+06	4135.7	-2245008	2637.4	39664	1431.93	0
1.83406e+06	4604.3	-3147211	3106	55603.8	1432.9	0
1.63547e+06	4605	-3345798	3106.7	59112.4	1433.88	0
2066674	4603.1	-2914596	3104.8	51494.1	1434.97	0
4008328	4348.2	-972942	2849.9	17189.6	1435.94	0
4.98565e+06	3974.4	4381.4	2476.1	-77.4091	1436.91	0
4.98549e+06	3941.5	4218.9	2443.2	-74.5381	1437.88	0
4.9853e+06	4139.2	4033.2	2640.9	-71.2572	1438.97	0
3.45515e+06	4370.9	-1526121	2872.6	26963	1439.94	0
780895	4592.5	-4200375	3094.2	74210.8	1440.91	0
774259	4592.5	-4207011	3094.2	74328.1	1441.88	0
795491	4591.6	-4185779	3093.3	73952.9	1442.97	0
780341	4594.3	-4200930	3096	74220.6	1443.94	0
778327	4592.5	-4202943	3094.2	74256.2	1444.9	0
939394	4592.9	-4041876	3094.6	71410.5	1445.87	0
835423	4599.5	-4145848	3101.2	73247.4	1446.96	0
779404	4592.8	-4201867	3094.5	74237.2	1447.92	0
781979	4588.1	-4199291	3089.8	74191.7	1448.89	0
773312	4586.1	-4207958	3087.8	74344.8	1449.98	0
781490	4587.5	-4199780	3089.2	74200.3	1450.95	0
780663	4588.8	-4200607	3090.5	74214.9	1451.91	0
783948	4589.7	-4197322	3091.4	74156.9	1452.88	0
774389	4589	-4206881	3090.7	74325.8	1453.97	0
774928	4588.1	-4206342	3089.8	74316.2	1454.94	0
777377	4588.1	-4203893	3089.8	74273	1455.91	0
774297	4589.5	-4206973	3091.2	74327.4	1456.99	0
821887	4592.8	-4159383	3094.5	73486.6	1457.95	0
780437	4597.5	-4200834	3099.2	74218.9	1458.92	0
788941	4594.4	-4192329	3096.1	74068.6	1459.9	0
774776	4593	-4206494	3094.7	74318.9	1460.98	0
773967	4591.7	-4207303	3093.4	74333.2	1461.95	0
775744	4591.1	-4205526	3092.8	74301.8	1462.92	0
772456	4590.7	-4208815	3092.4	74359.9	1463.89	0
776832	4592.2	-4204438	3093.9	74282.6	1464.98	0
776659	4588.8	-4204611	3090.5	74285.6	1465.95	0
778095	4589.8	-4203175	3091.5	74260.3	1466.92	0
768693	4588.3	-4212577	3090	74426.4	1468	0
776814	4589.3	-4204456	3091	74282.9	1468.97	0
780080	4591.4	-4201191	3093.1	74225.2	1469.94	0
776388	4591.4	-4204883	3093.1	74290.4	1470.91	0
778430	4590.3	-4202840	3092	74254.4	1471.99	0
783362	4592.5	-4197908	3094.2	74167.2	1472.96	0
783569	4589.5	-4197701	3091.2	74163.6	1473.93	0
776794	4590.7	-4204476	3092.4	74283.3	1474.9	0
782688	4590.3	-4198582	3092	74179.1	1475.99	0
777700	4591.9	-4203570	3093.6	74267.2	1476.95	0
776291	4589.7	-4204979	3091.4	74292.1	1477.92	0
777405	4588.2	-4203865	3089.9	74272.5	1479.01	0
775275	4589.3	-4205995	3091	74310.1	1479.98	0
773783	4589.8	-4207487	3091.5	74336.5	1480.95	0
777978	4590.8	-4203292	3092.5	74262.4	1481.92	0
780706	4589.1	-4200564	3090.8	74214.1	1483.01	0
780465	4589.4	-4200805	3091.1	74218.4	1483.98	0
770138	4589.4	-4211132	3091.1	74400.9	1484.95	0
778065	4589.4	-4203205	3091.1	74260.8	1485.92	0
786658	4588.7	-4194612	3090.4	74109	1487.01	0
779553	4593.1	-4201718	3094.8	74234.5	1487.97	0
784273	4588	-4196997	3089.7	74151.1	1488.95	0
779801	4590.6	-4201469	3092.3	74230.1	1489.91	0
780266	4587.3	-4201004	3089	74221.9	1491	0
779277	4590.7	-4201993	3092.4	74239.4	1491.97	0
779449	4590.8	-4201821	3092.5	74236.4	1492.94	0
782871	4589.8	-4198399	3091.5	74175.9	1494.02	0
781915	4589.1	-4199355	3090.8	74192.8	1494.99	0
781518	4589.4	-4199752	3091.1	74199.8	1495.97	0
785372	4590.7	-4195898	3092.4	74131.7	1496.94	0
810654	4595.4	-4170616	3097.1	73685	1498.02	0
787647	4594	-4193624	3095.7	74091.5	1498.99	0
786894	4594	-4194376	3095.7	74104.8	1499.96	0
773236	4589.7	-4208034	3091.4	74346.1	1500.93	0
773896	4591.9	-4207374	3093.6	74334.5	1502.02	0
776390	4595.7	-4204880	3097.4	74290.4	1502.99	0
776151	4595.3	-4205119	3097	74294.6	1503.96	0
779786	4592.7	-4201484	3094.4	74230.4	1504.93	0
783787	4590	-4197483	3091.7	74159.7	1506.02	0
778597	4588.4	-4202673	3090.1	74251.4	1506.99	0
780501	4587.1	-4200769	3088.8	74217.8	1507.95	0
785503	4588.1	-4195768	3089.8	74129.4	1508.92	0
787587	4588.9	-4193683	3090.6	74092.6	1510.01	0
785554	4590.3	-4195716	3092	74128.5	1510.98	0
788525	4588.9	-4192745	3090.6	74076	1511.95	0
782532	4586.6	-4198738	3088.3	74181.9	1513.03	0
789663	4588.3	-4191607	3090	74055.9	1514	0
793063	4588.3	-4188207	3090	73995.8	1514.97	0
786321	4590.4	-4194950	3092.1	74114.9	1515.94	0
785411	4589.3	-4195859	3091	74131	1517.03	0
786593	4590.9	-4194677	3092.6	74110.1	1518	0
776767	4593.3	-4204503	3095	74283.7	1518.97	0
782741	4588.9	-4198530	3090.6	74178.2	1519.94	0
780782	4590	-4200489	3091.7	74212.8	1521.02	0
784320	4590.7	-4196950	3092.4	74150.3	1521.99	0
785051	4592.1	-4196219	3093.8	74137.4	1522.96	0
785044	4591.7	-4196226	3093.4	74137.5	1524.05	0
779712	4590.5	-4201558	3092.2	74231.7	1525.01	0
781731	4591.3	-4199539	3093	74196	1525.98	0
782743	4592	-4198527	3093.7	74178.2	1526.95	0
783383	4590.7	-4197887	3092.4	74166.9	1528.04	0
783108	4590	-4198162	3091.7	74171.7	1529.01	0
784344	4590	-4196926	3091.7	74149.9	1529.98	0
783708	4590.9	-4197562	3092.6	74161.1	1530.95	0
785270	4589.1	-4196000	3090.8	74133.5	1532.03	0
785261	4589.6	-4196009	3091.3	74133.7	1533	0
786455	4591.1	-4194815	3092.8	74112.6	1533.97	0
779810	4589.2	-4201460	3090.9	74230	1535.05	0
791571	4590.6	-4189700	3092.3	74022.2	1536.02	0
784035	4591	-4197235	3092.7	74155.3	1536.99	0
788139	4591.8	-4193131	3093.5	74082.8	1537.95	0
782299	4590.2	-4198971	3091.9	74186	1539.04	0
787179	4589.6	-4194091	3091.3	74099.8	1540.01	0
789012	4589.1	-4192258	3090.8	74067.4	1540.98	0
789588	4589.3	-4191682	3091	74057.2	1541.95	0
788096	4589	-4193174	3090.7	74083.6	1543.04	0
778765	4589	-4202505	3090.7	74248.4	1544.01	0
776206	4591.4	-4205064	3093.1	74293.6	1544.98	0
781907	4591.4	-4199363	3093.1	74192.9	1546.07	0
782323	4591.6	-4198947	3093.3	74185.6	1547.04	0
781502	4590.4	-4199768	3092.1	74200.1	1548.01	0
784113	4590.3	-4197158	3092	74154	1548.98	0
777678	4590.7	-4203593	3092.4	74267.6	1550.06	0
792218	4589.5	-4189052	3091.2	74010.8	1551.03	0
787546	4589.9	-4193724	3091.6	74093.3	1552.01	0
787014	4590.7	-4194257	3092.4	74102.7	1552.98	0
794100	4589.9	-4187171	3091.6	73977.5	1554.06	0
788967	4590.1	-4192303	3091.8	74068.2	1555.03	0
789053	4590.2	-4192217	3091.9	74066.7	1556	0
782834	4588.4	-4198436	3090.1	74176.6	1556.97	0
782751	4586.8	-4198519	3088.5	74178	1558.06	0
790429	4586.8	-4190841	3088.5	74042.4	1559.03	0
810968	4588	-4170302	3089.7	73679.5	1560	0
801104	4588.7	-4180166	3090.4	73853.8	1560.97	0
786821	4586.6	-4194449	3088.3	74106.1	1562.05	0
784890	4583.2	-4196380	3084.9	74140.2	1563.02	0
792541	4582.9	-4188729	3084.6	74005.1	1563.99	0
792196	4583.6	-4189075	3085.3	74011.1	1565.07	0
791859	4584.3	-4189411	3086	74017.1	1566.04	0
776941	4580.9	-4204329	3082.6	74280.7	1567.01	0
784878	4584.4	-4196392	3086.1	74140.4	1567.98	0
788115	4586.9	-4193156	3088.6	74083.2	1569.07	0
793516	4587.6	-4187754	3089.3	73987.8	1570.04	0
794300	4586.6	-4186971	3088.3	73974	1571.01	0
790630	4586.1	-4190641	3087.8	74038.8	1571.98	0
796706	4589.4	-4184564	3091.1	73931.5	1573.07	0
794870	4589.4	-4186400	3091.1	73963.9	1574.04	0
792494	4588.2	-4188776	3089.9	74005.9	1575.01	0
792719	4586.6	-4188551	3088.3	74001.9	1575.98	0
794752	4586.2	-4186518	3087.9	73966	1577.07	0
797215	4589.1	-4184055	3090.8	73922.5	1578.04	0
790319	4586.5	-4190951	3088.2	74044.3	1579.01	0
798582	4587.5	-4182688	3089.2	73898.3	1580.09	0
795070	4586.5	-4186200	3088.2	73960.4	1581.06	0
795388	4587.4	-4185882	3089.1	73954.8	1582.03	0
791579	4588.1	-4189691	3089.8	74022.1	1583	0
789750	4588.9	-4191520	3090.6	74054.4	1584.08	0
771349	4582.3	-4209921	3084	74379.5	1585.05	0
772342	4584.9	-4208928	3086.6	74361.9	1586.02	0
788698	4587.8	-4192572	3089.5	74072.9	1586.99	0
782158	4587.3	-4199112	3089	74188.5	1588.07	0
782446	4587.3	-4198824	3089	74183.4	1589.04	0
786348	4588.1	-4194922	3089.8	74114.5	1590.01	0
783993	4587.2	-4197277	3088.9	74156.1	1591.09	0
792649	4588.6	-4188621	3090.3	74003.1	1592.06	0
785419	4588.2	-4195851	3089.9	74130.9	1593.03	0
784635	4589	-4196635	3090.7	74144.7	1594.01	0
785476	4585.9	-4195795	3087.6	74129.9	1595.09	0
782805	4585.5	-4198465	3087.2	74177.1	1596.06	0
783054	4587.5	-4198216	3089.2	74172.7	1597.03	0
789486	4586.6	-4191784	3088.3	74059	1598.01	0
787097	4588.1	-4194173	3089.8	74101.2	1599.09	0
790115	4587.5	-4191155	3089.2	74047.9	1600.06	0
786494	4585.5	-4194776	3087.2	74111.9	1601.04	0
797937	4585.5	-4183333	3087.2	73909.7	1602.01	0
792582	4586.8	-4188688	3088.5	74004.3	1603.09	0
788720	4586.8	-4192551	3088.5	74072.6	1604.06	0
793275	4588.7	-4187995	3090.4	73992.1	1605.03	0
790433	4586.7	-4190837	3088.4	74042.3	1606.11	0
793493	4589.8	-4187777	3091.5	73988.2	1607.08	0
783312	4588.5	-4197958	3090.2	74168.1	1608.05	0
784195	4590.1	-4197075	3091.8	74152.5	1609.02	0
790386	4591.9	-4190884	3093.6	74043.1	1610.11	0
786690	4589.9	-4194581	3091.6	74108.4	1611.08	0
778418	4589.3	-4202852	3091	74254.6	1612.05	0
784968	4590.6	-4196302	3092.3	74138.9	1613.02	0
786284	4590	-4194986	3091.7	74115.6	1614.11	0
789247	4587.8	-4192023	3089.5	74063.2	1615.08	0
789691	4588.8	-4191580	3090.5	74055.4	1616.05	0
787957	4588.8	-4193314	3090.5	74086	1617.02	0
785341	4589.2	-4195929	3090.9	74132.3	1618.11	0
785846	4588.7	-4195424	3090.4	74123.3	1619.08	0
783781	4586.7	-4197490	3088.4	74159.8	1620.05	0
783430	4587.5	-4197840	3089.2	74166	1621.02	0
782993	4587.7	-4198277	3089.4	74173.7	1622.1	0
781899	4589.7	-4199371	3091.4	74193.1	1623.07	0
780067	4590.2	-4201203	3091.9	74225.4	1624.04	0
781362	4588.1	-4199908	3089.8	74202.6	1625.12	0
783592	4587.9	-4197678	3089.6	74163.2	1626.09	0
781783	4589.1	-4199488	3090.8	74195.1	1627.06	0
782278	4588.9	-4198992	3090.6	74186.4	1628.03	0
789142	4590.3	-4192128	3092	74065.1	1629.11	0
788754	4589.3	-4192516	3091	74072	1630.08	0
795809	4590.5	-4185461	3092.2	73947.3	1631.05	0
788663	4587.5	-4192607	3089.2	74073.6	1632.13	0
792663	4587.5	-4188607	3089.2	74002.9	1633.1	0
792633	4588.9	-4188637	3090.6	74003.4	1634.07	0
795530	4588.5	-4185740	3090.2	73952.2	1635.04	0
792982	4590.2	-4188288	3091.9	73997.3	1636.12	0
793799	4589.3	-4187471	3091	73982.8	1637.09	0
789671	4587.5	-4191599	3089.2	74055.8	1638.06	0
794403	4590.1	-4186868	3091.8	73972.2	1639.14	0
793714	4589.7	-4187556	3091.4	73984.3	1640.12	0
795614	4590.2	-4185657	3091.9	73950.8	1641.08	0
787744	4589.2	-4193526	3090.9	74089.8	1642.05	0
794387	4589.5	-4186883	3091.2	73972.4	1643.14	0
791545	4588.2	-4189725	3089.9	74022.6	1644.11	0
789834	4587.2	-4191436	3088.9	74052.9	1645.08	0
793894	4589.4	-4187376	3091.1	73981.1	1646.05	0
791180	4588	-4190090	3089.7	74029.1	1647.13	0
797498	4588	-4183772	3089.7	73917.5	1648.1	0
790720	4588.3	-4190550	3090	74037.2	1649.07	0
786764	4586.5	-4194506	3088.2	74107.1	1650.15	0
786947	4584.6	-4194324	3086.3	74103.9	1651.12	0
789439	4585.7	-4191831	3087.4	74059.9	1652.09	0
793402	4587.4	-4187868	3089.1	73989.8	1653.06	0
797328	4585.7	-4183942	3087.4	73920.5	1654.15	0
792356	4588.1	-4188914	3089.8	74008.3	1655.12	0
796343	4587.5	-4184927	3089.2	73937.9	1656.09	0
785532	4584.9	-4195738	3086.6	74128.9	1657.06	0
792492	4585.5	-4188778	3087.2	74005.9	1658.14	0
788770	4585.8	-4192500	3087.5	74071.7	1659.11	0
789089	4586.1	-4192181	3087.8	74066	1660.08	0
791712	4586.1	-4189558	3087.8	74019.7	1661.05	0
789416	4587.7	-4191854	3089.4	74060.3	1662.14	0
793393	4584.8	-4187878	3086.5	73990	1663.11	0
794546	4586.7	-4186724	3088.4	73969.6	1664.08	0
790621	4586.8	-4190649	3088.5	74039	1665.16	0
793435	4588.6	-4187835	3090.3	73989.2	1666.13	0
792339	4587.4	-4188931	3089.1	74008.6	1667.11	0
785875	4588	-4195395	3089.7	74122.8	1668.07	0
788994	4586.5	-4192276	3088.2	74067.7	1669.15	0
790388	4587.3	-4190882	3089	74043.1	1670.12	0
790141	4588.7	-4191129	3090.4	74047.4	1671.09	0
799462	4590.9	-4181808	3092.6	73882.8	1672.06	0
794013	4589.3	-4187257	3091	73979	1673.14	0
790934	4590.5	-4190336	3092.2	74033.4	1674.11	0
790043	4591.1	-4191227	3092.8	74049.2	1675.08	0
797223	4590.3	-4184047	3092	73922.3	1676.16	0
793885	4590.3	-4187385	3092	73981.3	1677.13	0
795014	4591	-4186256	3092.7	73961.4	1678.1	0
788761	4590.9	-4192509	3092.6	74071.8	1679.07	0
798228	4588.2	-4183042	3089.9	73904.6	1680.15	0
792945	4590.6	-4188326	3092.3	73997.9	1681.12	0
786053	4589.2	-4195217	3090.9	74119.7	1682.09	0
790499	4589.3	-4190771	3091	74041.1	1683.18	0
785456	4588.6	-4195814	3090.3	74130.2	1684.15	0
790808	4588.2	-4190463	3089.9	74035.7	1685.12	0
792070	4590	-4189200	3091.7	74013.4	1686.09	0
796299	4590.2	-4184972	3091.9	73938.7	1687.17	0
794895	4591.5	-4186376	3093.2	73963.5	1688.14	0
791306	4589.8	-4189964	3091.5	74026.9	1689.11	0
790844	4589.8	-4190426	3091.5	74035	1690.08	0
792954	4591.1	-4188316	3092.8	73997.8	1691.17	0
792477	4591.1	-4188793	3092.8	74006.2	1692.14	0
795485	4590	-4185786	3091.7	73953	1693.11	0
793418	4591.2	-4187852	3092.9	73989.6	1694.08	0
789045	4588.7	-4192225	3090.4	74066.8	1695.16	0
796616	4590.4	-4184654	3092.1	73933.1	1696.13	0
794318	4590.3	-4186952	3092	73973.7	1697.1	0
797039	4589.8	-4184231	3091.5	73925.6	1698.19	0
796896	4591.1	-4184375	3092.8	73928.1	1699.16	0
790055	4588.3	-4191215	3090	74049	1700.13	0
789425	4589.4	-4191845	3091.1	74060.1	1701.1	0
795403	4590.3	-4185868	3092	73954.5	1702.19	0
792576	4591.5	-4188694	3093.2	74004.4	1703.16	0
792634	4589.5	-4188636	3091.2	74003.4	1704.12	0
790637	4589.5	-4190633	3091.2	74038.7	1705.1	0
794573	4589.6	-4186697	3091.3	73969.1	1706.18	0
795685	4588.9	-4185585	3090.6	73949.5	1707.15	0
789970	4589.1	-4191300	3090.8	74050.5	1708.12	0
788967	4589.2	-4192303	3090.9	74068.2	1709.09	0
788360	4588.7	-4192910	3090.4	74078.9	1710.18	0
787892	4587.2	-4193378	3088.9	74087.2	1711.14	0
795413	4589.1	-4185857	3090.8	73954.3	1712.12	0
795727	4590.8	-4185543	3092.5	73948.8	1713.2	0
792103	4590.6	-4189167	3092.3	74012.8	1714.16	0
797028	4590.6	-4184242	3092.3	73925.8	1715.13	0
794580	4590.8	-4186691	3092.5	73969	1716.1	0
794965	4590.5	-4186305	3092.2	73962.2	1717.19	0
796869	4591.6	-4184401	3093.3	73928.6	1718.16	0
792132	4590.7	-4189138	3092.4	74012.3	1719.13	0
795584	4591	-4185687	3092.7	73951.3	1720.21	0
794233	4591	-4187037	3092.7	73975.2	1721.17	0
796158	4591.3	-4185113	3093	73941.1	1722.15	0
795834	4591.9	-4185436	3093.6	73946.9	1723.12	0
793063	4591.1	-4188207	3092.8	73995.8	1724.2	0
796624	4591.6	-4184646	3093.3	73932.9	1725.17	0
792743	4589.9	-4188528	3091.6	74001.5	1726.14	0
791187	4590.9	-4190083	3092.6	74029	1727.11	0
794235	4590	-4187036	3091.7	73975.1	1728.2	0
800151	4590.5	-4181119	3092.2	73870.6	1729.16	0
789745	4589.5	-4191525	3091.2	74054.4	1730.13	0
788925	4587	-4192345	3088.7	74068.9	1731.22	0
794081	4588.5	-4187189	3090.2	73977.8	1732.19	0
790182	4590	-4191088	3091.7	74046.7	1733.15	0
792330	4590	-4188940	3091.7	74008.8	1734.12	0
786117	4589.5	-4195153	3091.2	74118.6	1735.21	0
797701	4589.5	-4183569	3091.2	73913.9	1736.18	0
796317	4591.3	-4184953	3093	73938.3	1737.15	0
792473	4590.9	-4188797	3092.6	74006.2	1738.12	0
796298	4590.6	-4184972	3092.3	73938.7	1739.2	0
797241	4591.3	-4184029	3093	73922	1740.17	0
795273	4589.7	-4185997	3091.4	73956.8	1741.14	0
793553	4589	-4187717	3090.7	73987.2	1742.23	0
795291	4588.6	-4185979	3090.3	73956.5	1743.2	0
798226	4590.8	-4183044	3092.5	73904.6	1744.17	0
786976	4590	-4194295	3091.7	74103.4	1745.14	0
794727	4589.6	-4186544	3091.3	73966.4	1746.23	0
794610	4590.5	-4186660	3092.2	73968.5	1747.2	0
792044	4590.7	-4189226	3092.4	74013.8	1748.16	0
794679	4590.7	-4186591	3092.4	73967.3	1749.13	0
793411	4590.4	-4187859	3092.1	73989.7	1750.22	0
794972	4591.3	-4186299	3093	73962.1	1751.19	0
793630	4590.2	-4187640	3091.9	73985.8	1752.16	0
793498	4589.6	-4187772	3091.3	73988.1	1753.13	0
794280	4591	-4186991	3092.7	73974.3	1754.22	0
791999	4592.1	-4189271	3093.8	74014.6	1755.19	0
799411	4592.3	-4181860	3094	73883.7	1756.16	0
799061	4592.3	-4182209	3094	73889.9	1757.13	0
797132	4592.1	-4184138	3093.8	73923.9	1758.21	0
804024	4591.9	-4177246	3093.6	73802.2	1759.19	0
796582	4592.7	-4184688	3094.4	73933.7	1760.16	0
798228	4591	-4183043	3092.7	73904.6	1761.24	0
796723	4592.9	-4184547	3094.6	73931.2	1762.2	0
798826	4592.2	-4182444	3093.9	73894	1763.17	0
797841	4592.2	-4183429	3093.9	73911.4	1764.14	0
803009	4592.1	-4178261	3093.8	73820.1	1765.23	0
797874	4592.7	-4183396	3094.4	73910.8	1766.2	0
799054	4591.7	-4182216	3093.4	73890	1767.17	0
797675	4592.5	-4183595	3094.2	73914.4	1768.14	0
797381	4592.3	-4183890	3094	73919.5	1769.23	0
799823	4592.6	-4181448	3094.3	73876.4	1770.2	0
802168	4592.7	-4179103	3094.4	73835	1771.17	0
795700	4592.4	-4185570	3094.1	73949.2	1772.14	0
799945	4592.1	-4181325	3093.8	73874.2	1773.23	0
795748	4593.1	-4185522	3094.8	73948.4	1774.2	0
798271	4592.9	-4183000	3094.6	73903.8	1775.17	0
798294	4592.8	-4182976	3094.5	73903.4	1776.26	0
800523	4593.3	-4180747	3095	73864	1777.23	0
797313	4592.5	-4183957	3094.2	73920.7	1778.2	0
797205	4592.5	-4184065	3094.2	73922.6	1779.17	0
799271	4592.7	-4181999	3094.4	73886.1	1780.26	0
802112	4592.6	-4179158	3094.3	73835.9	1781.22	0
800932	4592.3	-4180338	3094	73856.8	1782.2	0
804394	4593.3	-4176877	3095	73795.6	1783.17	0
805289	4594.1	-4175982	3095.8	73779.8	1784.25	0
799568	4592.7	-4181702	3094.4	73880.9	1785.22	0
809356	4593.2	-4171914	3094.9	73708	1786.18	0
798474	4592.3	-4182796	3094	73900.2	1787.16	0
802874	4592.6	-4178396	3094.3	73822.5	1788.24	0
801096	4592.7	-4180174	3094.4	73853.9	1789.21	0
799619	4592.9	-4181651	3094.6	73880	1790.18	0
799306	4591.7	-4181964	3093.4	73885.5	1791.27	0
796282	4592.5	-4184988	3094.2	73938.9	1792.24	0
803386	4593.1	-4177884	3094.8	73813.4	1793.22	0
805024	4593.1	-4176246	3094.8	73784.5	1794.19	0
803114	4593.9	-4178156	3095.6	73818.2	1795.27	0
800532	4592.8	-4180738	3094.5	73863.9	1796.24	0
803367	4592.3	-4177904	3094	73813.8	1797.21	0
801868	4593.6	-4179402	3095.3	73840.3	1798.18	0
800105	4593.3	-4181165	3095	73871.4	1799.26	0
803671	4593.3	-4177599	3095	73808.4	1800.23	0
800913	4593.2	-4180357	3094.9	73857.1	1801.2	0
806990	4593.8	-4174280	3095.5	73749.8	1802.17	0
804980	4593.7	-4176290	3095.4	73785.3	1803.26	0
799295	4592.9	-4181975	3094.6	73885.7	1804.23	0
805859	4593.5	-4175411	3095.2	73769.8	1805.2	0
798045	4591.9	-4183225	3093.6	73907.8	1806.28	0
801801	4593.5	-4179469	3095.2	73841.4	1807.25	0
805642	4593.5	-4175628	3095.2	73773.6	1808.22	0
799245	4593.7	-4182025	3095.4	73886.6	1809.18	0
806875	4592.3	-4174395	3094	73751.8	1810.27	0
805211	4593.4	-4176059	3095.1	73781.2	1811.24	0
802147	4593.8	-4179124	3095.5	73835.3	1812.21	0
803401	4594.3	-4177869	3096	73813.2	1813.18	0
805700	4592.4	-4175570	3094.1	73772.6	1814.26	0
803781	4593.5	-4177490	3095.2	73806.5	1815.23	0
804991	4593.3	-4176279	3095	73785.1	1816.2	0
806776	4593.4	-4174495	3095.1	73753.6	1817.28	0
809384	4593.8	-4171887	3095.5	73707.5	1818.25	0
807438	4593.8	-4173832	3095.5	73741.9	1819.22	0
804313	4593.2	-4176958	3094.9	73797.1	1820.19	0
803777	4592.6	-4177493	3094.3	73806.5	1821.28	0
800219	4591.9	-4181051	3093.6	73869.4	1822.25	0
803852	4591.9	-4177418	3093.6	73805.2	1823.22	0
804254	4593.1	-4177016	3094.8	73798.1	1824.19	0
798775	4593.2	-4182495	3094.9	73894.9	1825.27	0
790388	4590.1	-4190883	3091.8	74043.1	1826.24	0
792297	4590.2	-4188973	3091.9	74009.4	1827.21	0
792769	4587.6	-4188501	3089.3	74001	1828.3	0
790921	4589.1	-4190350	3090.8	74033.7	1829.27	0
794552	4588	-4186718	3089.7	73969.5	1830.24	0
799440	4590.4	-4181830	3092.1	73883.2	1831.2	0
796719	4589.5	-4184551	3091.2	73931.2	1832.29	0
798270	4590.2	-4183000	3091.9	73903.8	1833.26	0
793349	4591.2	-4187921	3092.9	73990.8	1834.23	0
790730	4590.2	-4190541	3091.9	74037.1	1835.2	0
794994	4590.5	-4186276	3092.2	73961.7	1836.29	0
796762	4590.6	-4184508	3092.3	73930.5	1837.26	0
795341	4590.6	-4185929	3092.3	73955.6	1838.23	0
790167	4589.7	-4191103	3091.4	74047	1839.31	0
797105	4590.2	-4184165	3091.9	73924.4	1840.28	0
796476	4590.6	-4184794	3092.3	73935.5	1841.25	0
800501	4592.2	-4180769	3093.9	73864.4	1842.22	0
804740	4591.9	-4176531	3093.6	73789.5	1843.3	0
797652	4591.5	-4183618	3093.2	73914.8	1844.27	0
797514	4591.9	-4183756	3093.6	73917.2	1845.24	0
798342	4592.6	-4182928	3094.3	73902.6	1846.21	0
792336	4591.1	-4188934	3092.8	74008.7	1847.3	0
791796	4591.5	-4189474	3093.2	74018.2	1848.27	0
778160	4592.4	-4203111	3094.1	74259.1	1849.24	0
778151	4593	-4203119	3094.7	74259.3	1850.32	0
785186	4593.3	-4196084	3095	74135	1851.29	0
784299	4593.3	-4196971	3095	74150.7	1852.26	0
781493	4593.7	-4199777	3095.4	74200.2	1853.23	0
785773	4593.6	-4195497	3095.3	74124.6	1854.32	0
787424	4593	-4193847	3094.7	74095.5	1855.29	0
782190	4590.4	-4199080	3092.1	74187.9	1856.26	0
782384	4592	-4198886	3093.7	74184.5	1857.23	0
790251	4590.8	-4191020	3092.5	74045.5	1858.32	0
785650	4591.4	-4195620	3093.1	74126.8	1859.29	0
793917	4591.2	-4187353	3092.9	73980.7	1860.26	0
961485	4601.4	-4019786	3103.1	71020.2	1861.23	0
962368	4607.7	-4018903	3109.4	71004.6	1862.31	0
962389	4605.8	-4018881	3107.5	71004.2	1863.29	0
963957	4606.1	-4017313	3107.8	70976.5	1864.26	0
964142	4604.8	-4017128	3106.5	70973.3	1865.23	0
964657	4607.5	-4016613	3109.2	70964.2	1866.31	0
960821	4607.5	-4020449	3109.2	71031.9	1867.28	0
960497	4608.1	-4020773	3109.8	71037.7	1868.25	0
964091	4606.1	-4017179	3107.8	70974.2	1869.33	0
964824	4606.1	-4016447	3107.8	70961.2	1870.3	0
965611	4605.5	-4015659	3107.2	70947.3	1871.27	0
964216	4605.6	-4017055	3107.3	70972	1872.24	0
962923	4605.6	-4018347	3107.3	70994.8	1873.32	0
963335	4605.7	-4017935	3107.4	70987.5	1874.29	0
962308	4605.7	-4018962	3107.4	71005.7	1875.26	0
948614	4605.6	-4032656	3107.3	71247.6	1876.34	0
945427	4605.7	-4035843	3107.4	71303.9	1877.31	0
942608	4605.4	-4038662	3107.1	71353.7	1878.28	0
941572	4605.1	-4039698	3106.8	71372	1879.26	0
939324	4605.1	-4041946	3106.8	71411.7	1880.34	0
942355	4605.5	-4038915	3107.2	71358.2	1881.31	0
942954	4605.5	-4038316	3107.2	71347.6	1882.28	0
944942	4605.3	-4036328	3107	71312.5	1883.25	0
960521	4605.2	-4020749	3106.9	71037.2	1884.33	0
961718	4605.6	-4019552	3107.3	71016.1	1885.3	0
964676	4605.6	-4016594	3107.3	70963.8	1886.27	0
966004	4605.8	-4015266	3107.5	70940.4	1887.36	0
965516	4606.1	-4015754	3107.8	70949	1888.33	0
963231	4605.8	-4018039	3107.5	70989.4	1889.3	0
963178	4606.1	-4018093	3107.8	70990.3	1890.27	0
964317	4606.1	-4016954	3107.8	70970.2	1891.35	0
962785	4605.6	-4018485	3107.3	70997.2	1892.32	0
957921	4605.3	-4023349	3107	71083.2	1893.29	0
951039	4605.3	-4030231	3107	71204.8	1894.26	0
940216	4604.6	-4041054	3106.3	71396	1895.34	0
951961	4605.2	-4029310	3106.9	71188.5	1896.31	0
961587	4605.2	-4019683	3106.9	71018.4	1897.28	0
965607	4605.5	-4015663	3107.2	70947.4	1898.36	0
967292	4605.7	-4013978	3107.4	70917.6	1899.33	0
967134	4605.7	-4014137	3107.4	70920.4	1900.3	0
964147	4605.7	-4017124	3107.4	70973.2	1901.27	0
963259	4605.6	-4018012	3107.3	70988.9	1902.35	0
965538	4605.5	-4015732	3107.2	70948.6	1903.32	0
967137	4605.7	-4014133	3107.4	70920.4	1904.29	0
965207	4605.5	-4016063	3107.2	70954.4	1905.26	0
966532	4605.6	-4014738	3107.3	70931	1906.35	0
966900	4605.5	-4014370	3107.2	70924.5	1907.32	0
967548	4605.6	-4013723	3107.3	70913.1	1908.29	0
965552	4605.6	-4015718	3107.3	70948.4	1909.26	0
953162	4605.3	-4028108	3107	71167.2	1910.34	0
943464	4605.3	-4037806	3107	71338.6	1911.31	0
937427	4604.8	-4043843	3106.5	71445.2	1912.28	0
929047	4604.5	-4052224	3106.2	71593.3	1913.36	0
924365	4604.3	-4056905	3106	71676	1914.33	0
916134	4603.5	-4065137	3105.2	71821.4	1915.3	0
914455	4602.9	-4066815	3104.6	71851.1	1916.27	0
912758	4603.1	-4068512	3104.8	71881.1	1917.36	0
908239	4602.6	-4073031	3104.3	71960.9	1918.33	0
909556	4602.3	-4071714	3104	71937.7	1919.3	0
913704	4602.5	-4067566	3104.2	71864.4	1920.27	0
928153	4603.4	-4053117	3105.1	71609.1	1921.36	0
939868	4604.6	-4041402	3106.3	71402.1	1922.33	0
947347	4605.1	-4033923	3106.8	71270	1923.3	0
959129	4605.4	-4022141	3107.1	71061.8	1924.27	0
954867	4605.1	-4026404	3106.8	71137.1	1925.36	0
959098	4605.1	-4022172	3106.8	71062.4	1926.33	0
961883	4605.5	-4019387	3107.2	71013.2	1927.3	0
961936	4605.6	-4019334	3107.3	71012.2	1928.38	0
955845	4605.5	-4025425	3107.2	71119.9	1929.35	0
955731	4605.3	-4025539	3107	71121.9	1930.33	0
964074	4605.5	-4017196	3107.2	70974.5	1931.3	0
966469	4605.7	-4014802	3107.4	70932.1	1932.38	0
961910	4605.8	-4019360	3107.5	71012.7	1933.35	0
964595	4605.7	-4016675	3107.4	70965.3	1934.32	0
965319	4605.6	-4015951	3107.3	70952.5	1935.29	0
968177	4605.7	-4013093	3107.4	70902	1936.37	0
965849	4605.6	-4015421	3107.3	70943.1	1937.34	0
965720	4605.7	-4015550	3107.4	70945.4	1938.31	0
961586	4605.5	-4019684	3107.2	71018.4	1939.4	0
943427	4604.7	-4037843	3106.4	71339.2	1940.37	0
918702	4604.7	-4062568	3106.4	71776.1	1941.34	0
901425	4603.2	-4079845	3104.9	72081.3	1942.31	0
899057	4601.4	-4082213	3103.1	72123.2	1943.4	0
920144	4601.4	-4061126	3103.1	71750.6	1944.37	0
928915	4603.5	-4052355	3105.2	71595.6	1945.34	0
929447	4604.1	-4051823	3105.8	71586.2	1946.31	0
906826	4603.5	-4074444	3105.2	71985.9	1947.4	0
869336	4598.7	-4111934	3100.4	72648.3	1948.37	0
842936	4592.8	-4138334	3094.5	73114.7	1949.34	0
822160	4586.5	-4159110	3088.2	73481.8	1950.31	0
819608	4584.3	-4161662	3086	73526.8	1951.4	0
823387	4585.5	-4157883	3087.2	73460.1	1952.37	0
817151	4584.3	-4164119	3086	73570.2	1953.34	0
820019	4582.9	-4161251	3084.6	73519.6	1954.31	0
825095	4584.1	-4156175	3085.8	73429.9	1955.4	0
816767	4584.1	-4164503	3085.8	73577	1956.37	0
836484	4584.6	-4144786	3086.3	73228.7	1957.34	0
840344	4590.4	-4140926	3092.1	73160.5	1958.31	0
845771	4590.7	-4135499	3092.4	73064.6	1959.4	0
843026	4591.7	-4138244	3093.4	73113.1	1960.37	0
850503	4591.6	-4130767	3093.3	72981	1961.34	0
847610	4591.2	-4133660	3092.9	73032.1	1962.31	0
852536	4593.3	-4128734	3095	72945.1	1963.4	0
848435	4593.2	-4132835	3094.9	73017.5	1964.37	0
847777	4592.7	-4133493	3094.4	73029.2	1965.34	0
852128	4593.9	-4129142	3095.6	72952.3	1966.31	0
858075	4594.9	-4123195	3096.6	72847.2	1967.4	0
875244	4599.1	-4106026	3100.8	72543.9	1968.37	0
894414	4599.1	-4086857	3100.8	72205.2	1969.34	0
858121	4595.4	-4123149	3097.1	72846.4	1970.42	0
867627	4595.4	-4113643	3097.1	72678.5	1971.39	0
854615	4596.8	-4126656	3098.5	72908.4	1972.36	0
840114	4592.4	-4141156	3094.1	73164.6	1973.33	0
833164	4589.8	-4148106	3091.5	73287.3	1974.41	0
862385	4589.8	-4118885	3091.5	72771.1	1975.38	0
897778	4599.4	-4083492	3101.1	72145.8	1976.35	0
900640	4601.5	-4080630	3103.2	72095.2	1977.32	0
900505	4601.9	-4080765	3103.6	72097.6	1978.41	0
857571	4596.7	-4123699	3098.4	72856.1	1979.38	0
831598	4590	-4149672	3091.7	73315	1980.34	0
825053	4584.5	-4156217	3086.2	73430.6	1981.42	0
825876	4584.3	-4155394	3086	73416.1	1982.39	0
832946	4586.6	-4148324	3088.3	73291.2	1983.36	0
866558	4586.6	-4114712	3088.3	72697.3	1984.33	0
869603	4597.6	-4111667	3099.3	72643.6	1985.41	0
878227	4597.6	-4103043	3099.3	72491.2	1986.38	0
937441	4599.9	-4043829	3101.6	71445	1987.36	0
967786	4605.2	-4013484	3106.9	70908.9	1988.33	0
962612	4605.6	-4018658	3107.3	71000.3	1989.41	0
959103	4605.7	-4022167	3107.4	71062.3	1990.38	0
938401	4605	-4042869	3106.7	71428.1	1991.36	0
914876	4604	-4066394	3105.7	71843.7	1992.44	0
889856	4601	-4091415	3102.7	72285.7	1993.41	0
871405	4598.4	-4109865	3100.1	72611.7	1994.38	0
860404	4595.2	-4120867	3096.9	72806.1	1995.36	0
862547	4596.1	-4118723	3097.8	72768.2	1996.44	0
847201	4592.6	-4134069	3094.3	73039.3	1997.41	0
821794	4583.7	-4159476	3085.4	73488.2	1998.38	0
807712	4583.7	-4173558	3085.4	73737	1999.36	0
794322	4580.5	-4186948	3082.2	73973.6	2000.44	0
799030	4574.1	-4182240	3075.8	73890.4	2001.42	0
796889	4576.1	-4184382	3077.8	73928.2	2002.39	0
[truncated: 1,513 more rows]

## Sheet: Cont. mode_2
SRS QCM200 Data File
Data Taken on 1/28/2021 at 1:25:03 PM
Tag Definitions
Zero Rel F = 1
Zero Rel R = 2
Zero Rel F and R = 3
User Tag = 4
Begining of File = 5
The Sauerbrey model was used to calculate the relative mass change.
Notes:
Raw F (Hz)	Raw R (Ohms)	Delta F (Hz)	Delta R (Ohms)	Delta Mass (ug/cm2)	Time (s)	Tag
4.98367e+06	864.09	0	0	0	0.049	5
4.98367e+06	864.1	-0.1	0.01	0.00176677	3.964	0
4.98367e+06	864.1	-0.1	0.01	0.00176677	4.947	0
4.98367e+06	864.11	-0.2	0.02	0.00353353	5.926	0
4.98367e+06	864.11	-0.2	0.02	0.00353353	6.906	0
4.98367e+06	864.11	-0.2	0.02	0.00353353	7.885	0
4.98367e+06	864.1	-0.2	0.01	0.00353353	8.977	0
4.98367e+06	864.09	-0.1	0	0.00176677	9.955	0
4.98367e+06	864.08	0	-0.01	0	10.934	0
4.98367e+06	864.07	0	-0.02	0	11.912	0
4.98367e+06	864.05	0	-0.04	0	12.889	0
4.98367e+06	864.04	0	-0.05	0	13.978	0
4.98367e+06	864.03	0	-0.06	0	14.957	0
4.98367e+06	864.02	0	-0.07	0	15.935	0
4.98367e+06	864.02	0.1	-0.07	-0.00176677	16.914	0
4.98367e+06	864.02	0	-0.07	0	17.895	0
4.98367e+06	864.01	0.1	-0.08	-0.00176677	18.99	0
4983675	864	0.2	-0.09	-0.00353353	19.968	0
4983675	863.99	0.2	-0.1	-0.00353353	20.948	0
4.98368e+06	863.96	0.3	-0.13	-0.0053003	21.925	0
4.98368e+06	863.94	0.4	-0.15	-0.00706706	22.897	0
4.98368e+06	863.88	0.6	-0.21	-0.0106006	23.995	0
4.98368e+06	863.84	0.7	-0.25	-0.0123674	24.968	0
4.98368e+06	863.79	1	-0.3	-0.0176677	25.949	0
4.98368e+06	863.76	1	-0.33	-0.0176677	26.925	0
4.98368e+06	863.73	1.1	-0.36	-0.0194344	27.903	0
4983676	863.71	1.2	-0.38	-0.0212012	28.996	0
4983676	863.7	1.2	-0.39	-0.0212012	29.976	0
4.98368e+06	863.68	1.3	-0.41	-0.022968	30.948	0
4.98368e+06	863.68	1.4	-0.41	-0.0247347	31.93	0
4.98368e+06	863.68	1.3	-0.41	-0.022968	32.902	0
4.98368e+06	863.67	1.5	-0.42	-0.0265015	33.997	0
4.98368e+06	863.67	1.3	-0.42	-0.022968	34.969	0
4.98368e+06	863.68	1.5	-0.41	-0.0265015	35.947	0
4.98368e+06	863.66	1.4	-0.43	-0.0247347	36.918	0
4.98368e+06	863.67	1.5	-0.42	-0.0265015	38.009	0
4.98368e+06	863.66	1.4	-0.43	-0.0247347	38.988	0
4.98368e+06	863.66	1.5	-0.43	-0.0265015	39.959	0
4.98368e+06	863.66	1.5	-0.43	-0.0265015	40.93	0
4.98368e+06	863.66	1.5	-0.43	-0.0265015	42.02	0
4.98368e+06	863.66	1.5	-0.43	-0.0265015	42.991	0
4.98368e+06	863.65	1.5	-0.44	-0.0265015	43.968	0
4.98368e+06	863.65	1.5	-0.44	-0.0265015	44.938	0
4.98368e+06	863.64	1.5	-0.45	-0.0265015	46.022	0
4.98368e+06	863.64	1.6	-0.45	-0.0282683	47	0
4.98368e+06	863.64	1.5	-0.45	-0.0265015	47.969	0
4.98368e+06	863.64	1.6	-0.45	-0.0282683	48.948	0
4.98368e+06	863.65	1.5	-0.44	-0.0265015	49.919	0
4.98368e+06	863.65	1.5	-0.44	-0.0265015	51.005	0
4.98368e+06	863.66	1.5	-0.43	-0.0265015	51.979	0
4.98368e+06	863.66	1.5	-0.43	-0.0265015	52.95	0
4.98368e+06	863.66	1.5	-0.43	-0.0265015	53.927	0
4.98368e+06	863.66	1.5	-0.43	-0.0265015	55.011	0
4.98368e+06	863.69	1.5	-0.4	-0.0265015	55.989	0
4.98368e+06	863.71	1.5	-0.38	-0.0265015	56.96	0
4.98368e+06	863.66	1.3	-0.43	-0.022968	57.931	0
4.98368e+06	863.66	1.3	-0.43	-0.022968	59.017	0
4.98368e+06	863.66	1.3	-0.43	-0.022968	59.988	0
4.98368e+06	863.65	1.3	-0.44	-0.022968	60.959	0
4.98368e+06	863.65	1.3	-0.44	-0.022968	61.936	0
4.98368e+06	863.65	1.3	-0.44	-0.022968	63.02	0
4.98368e+06	863.65	1.3	-0.44	-0.022968	63.991	0
4.98368e+06	863.65	1.3	-0.44	-0.022968	64.964	0
4.98368e+06	863.66	1.3	-0.43	-0.022968	65.936	0
4.98368e+06	863.64	1.3	-0.45	-0.022968	67.029	0
4.98368e+06	863.66	1.3	-0.43	-0.022968	68	0
4.98368e+06	863.66	1.3	-0.43	-0.022968	68.969	0
4.98368e+06	863.66	1.3	-0.43	-0.022968	69.941	0
4.98368e+06	863.66	1.3	-0.43	-0.022968	71.029	0
4.98368e+06	863.66	1.3	-0.43	-0.022968	72.009	0
4.98368e+06	863.68	1.3	-0.41	-0.022968	72.979	0
4.98368e+06	863.68	1.4	-0.41	-0.0247347	73.95	0
4.98368e+06	863.69	1.3	-0.4	-0.022968	75.039	0
4.98368e+06	863.7	1.3	-0.39	-0.022968	76.018	0
4.98368e+06	863.7	1.3	-0.39	-0.022968	76.99	0
4.98368e+06	863.7	1.4	-0.39	-0.0247347	77.963	0
4.98368e+06	863.71	1.3	-0.38	-0.022968	79.049	0
4.98368e+06	863.71	1.4	-0.38	-0.0247347	80.019	0
4.98368e+06	863.72	1.3	-0.37	-0.022968	80.999	0
4.98368e+06	863.72	1.4	-0.37	-0.0247347	81.968	0
4.98368e+06	863.73	1.3	-0.36	-0.022968	83.052	0
4.98368e+06	863.74	1.3	-0.35	-0.022968	84.022	0
4.98368e+06	863.74	1.3	-0.35	-0.022968	84.995	0
4.98368e+06	863.75	1.3	-0.34	-0.022968	85.968	0
4.98368e+06	863.75	1.3	-0.34	-0.022968	87.06	0
4.98368e+06	863.76	1.3	-0.33	-0.022968	88.031	0
4.98368e+06	863.76	1.3	-0.33	-0.022968	89.002	0
4.98368e+06	863.76	1.3	-0.33	-0.022968	89.976	0
4.98368e+06	863.76	1.3	-0.33	-0.022968	91.06	0
4.98368e+06	863.76	1.3	-0.33	-0.022968	92.04	0
4.98368e+06	863.77	1.3	-0.32	-0.022968	93.011	0
4.98368e+06	863.77	1.3	-0.32	-0.022968	93.979	0
4983676	863.77	1.2	-0.32	-0.0212012	95.063	0
4.98368e+06	863.78	1.3	-0.31	-0.022968	96.041	0
4.98368e+06	863.79	1.3	-0.3	-0.022968	97.01	0
4983676	863.8	1.2	-0.29	-0.0212012	97.98	0
4.98368e+06	863.79	1.3	-0.3	-0.022968	99.066	0
4983676	863.8	1.2	-0.29	-0.0212012	100.039	0
4983676	863.81	1.2	-0.28	-0.0212012	101.018	0
4983676	863.81	1.2	-0.28	-0.0212012	101.99	0
4.98368e+06	863.81	1.3	-0.28	-0.022968	103.078	0
4.98368e+06	863.81	1.3	-0.28	-0.022968	104.051	0
4983676	863.8	1.2	-0.29	-0.0212012	105.021	0
4.98368e+06	863.8	1.3	-0.29	-0.022968	105.995	0
4983676	863.8	1.2	-0.29	-0.0212012	107.083	0
4983676	863.81	1.2	-0.28	-0.0212012	108.052	0
4983676	863.81	1.2	-0.28	-0.0212012	109.022	0
4983676	863.8	1.2	-0.29	-0.0212012	109.995	0
4983676	863.83	1.2	-0.26	-0.0212012	111.083	0
4983676	863.84	1.2	-0.25	-0.0212012	112.061	0
4.98368e+06	863.84	1.1	-0.25	-0.0194344	113.032	0
4.98368e+06	863.83	1.1	-0.26	-0.0194344	114.005	0
4.98367e+06	863.91	-0.4	-0.18	0.00706706	114.979	0
4983670	864.58	-4.8	0.49	0.0848048	116.063	0
4.98365e+06	865.74	-25.3	1.65	0.446992	117.041	0
4.9836e+06	867.06	-72.1	2.97	1.27384	118.019	0
4.98358e+06	867.91	-93	3.82	1.64309	118.996	0
4983575	868.56	-99.8	4.47	1.76323	120.085	0
4.98357e+06	868.56	-100.7	4.47	1.77913	121.062	0
4.98357e+06	869.07	-100.4	4.98	1.77383	122.033	0
4.98358e+06	869.2	-99.6	5.11	1.7597	123.007	0
4983576	869.26	-98.8	5.17	1.74557	124.093	0
4.98358e+06	869.3	-97.9	5.21	1.72966	125.063	0
4983578	869.33	-96.8	5.24	1.71023	126.034	0
4983579	869.38	-95.8	5.29	1.69256	127.007	0
4.98358e+06	869.41	-94.7	5.32	1.67313	128.093	0
4.98358e+06	869.43	-93.7	5.34	1.65546	129.063	0
4.98358e+06	869.46	-92.5	5.37	1.63426	130.034	0
4.98358e+06	869.49	-91.5	5.4	1.61659	131.011	0
4.98358e+06	869.51	-90.5	5.42	1.59892	132.093	0
4.98359e+06	869.52	-89.5	5.43	1.58126	133.063	0
4.98359e+06	869.53	-88.5	5.44	1.56359	134.034	0
4.98359e+06	869.53	-87.7	5.44	1.54945	135.007	0
4983588	869.54	-86.8	5.45	1.53355	136.093	0
4.98359e+06	869.56	-85.9	5.47	1.51765	137.023	0
4.98359e+06	869.61	-85.2	5.52	1.50528	138.108	0
4.98359e+06	869.64	-84.4	5.55	1.49115	139.08	0
4.98359e+06	869.64	-83.7	5.55	1.47878	140.05	0
4.98359e+06	869.69	-82.9	5.6	1.46465	141.02	0
4.98359e+06	869.72	-82.3	5.63	1.45405	142.103	0
4.98359e+06	869.73	-81.7	5.64	1.44345	143.073	0
4.98359e+06	869.75	-81	5.66	1.43108	144.043	0
4.98359e+06	869.76	-80.5	5.67	1.42225	145.011	0
4.98359e+06	869.79	-79.9	5.7	1.41165	146.094	0
4.9836e+06	869.82	-79.5	5.73	1.40458	147.063	0
4.9836e+06	869.84	-78.9	5.75	1.39398	148.033	0
4.9836e+06	869.87	-78.5	5.78	1.38691	149.12	0
4.9836e+06	869.87	-78.1	5.78	1.37984	150.092	0
4.9836e+06	869.87	-77.7	5.78	1.37278	151.061	0
4.9836e+06	869.9	-77.2	5.81	1.36394	152.031	0
4983598	869.9	-76.8	5.81	1.35688	153.116	0
4.9836e+06	869.92	-76.5	5.83	1.35158	154.088	0
4.9836e+06	869.93	-76.2	5.84	1.34628	155.06	0
4983599	869.95	-75.8	5.86	1.33921	156.031	0
4.9836e+06	869.99	-75.5	5.9	1.33391	157.117	0
4.9836e+06	869.99	-75.1	5.9	1.32684	158.09	0
4983600	870	-74.8	5.91	1.32154	159.062	0
4.9836e+06	870.02	-74.5	5.93	1.31624	160.033	0
4.9836e+06	870.02	-74.3	5.93	1.31271	161.126	0
4.9836e+06	870.02	-74	5.93	1.30741	162.097	0
4.9836e+06	870.04	-73.7	5.95	1.30211	163.067	0
4.9836e+06	870.04	-73.4	5.95	1.29681	164.04	0
4.9836e+06	870.04	-73.1	5.95	1.29151	165.126	0
4983602	870.05	-72.8	5.96	1.28621	166.097	0
4.9836e+06	870.07	-72.5	5.98	1.2809	167.067	0
4.9836e+06	870.08	-72.1	5.99	1.27384	168.04	0
4983603	870.08	-71.8	5.99	1.26854	169.126	0
4.9836e+06	870.09	-71.4	6	1.26147	170.097	0
4.9836e+06	870.09	-71.2	6	1.25794	171.073	0
4983604	870.1	-70.8	6.01	1.25087	172.044	0
4.9836e+06	870.12	-70.5	6.03	1.24557	173.13	0
4.9836e+06	870.11	-70.2	6.02	1.24027	174.102	0
4.9836e+06	870.11	-69.9	6.02	1.23497	175.073	0
4.98361e+06	870.13	-69.6	6.04	1.22967	176.044	0
4.98361e+06	870.14	-69.4	6.05	1.22614	177.13	0
4.98361e+06	870.13	-69	6.04	1.21907	178.102	0
4.98361e+06	870.13	-68.7	6.04	1.21377	179.073	0
4.98361e+06	870.13	-68.4	6.04	1.20847	180.044	0
4.98361e+06	870.14	-68.1	6.05	1.20317	181.134	0
4.98361e+06	870.15	-67.9	6.06	1.19963	182.104	0
4.98361e+06	870.14	-67.7	6.05	1.1961	183.075	0
4.98361e+06	870.16	-67.4	6.07	1.1908	184.048	0
4.98361e+06	870.16	-67.2	6.07	1.18727	185.134	0
4.98361e+06	870.16	-66.9	6.07	1.18197	186.104	0
4983608	870.19	-66.8	6.1	1.1802	187.075	0
4.98361e+06	870.19	-66.5	6.1	1.1749	188.048	0
4.98361e+06	870.18	-66.4	6.09	1.17313	189.134	0
4.98361e+06	870.2	-66	6.11	1.16607	190.104	0
4.98361e+06	870.2	-65.9	6.11	1.1643	191.075	0
4983609	870.23	-65.8	6.14	1.16253	192.052	0
4.98361e+06	870.22	-65.5	6.13	1.15723	193.136	0
4.98361e+06	870.22	-65.3	6.13	1.1537	194.105	0
4.98361e+06	870.23	-65.2	6.14	1.15193	195.079	0
4.98361e+06	870.23	-65	6.14	1.1484	196.05	0
4983610	870.24	-64.8	6.15	1.14486	197.134	0
4.98361e+06	870.26	-64.7	6.17	1.1431	198.104	0
4.98361e+06	870.27	-64.5	6.18	1.13956	199.075	0
[truncated: 3,618 more rows]

## Sheet: Cont. mode_3
SRS QCM200 Data File
[truncated: 2,680 more rows]
